# Supplementary material
Source: publisher figshare collection journal article supplement (https://acs.figshare.com/ndownloader/files/6014382)
Supplement: Supplementary file 1 [file 6014382]

_publ_title
;
Highly efficient thermally activated delayed fluorescence in dinuclear Ag(I) complexes
with a bis-bidentate tetraphosphane bridging ligand 
;
  
_publ_author_name
;
 Jin Chen, Teng Teng, Liju Kang, Xu-Ling Chen, Xiao-Yuan Wu,
 Rongmin Yu,*  and Can-Zhong Lu*
;

_publ_author_address
;
Fujian Institute of Research on the Structure of Matter,
Chinese Academy of Sciences,
Fuzhou, Fujian, 350002 P. R. China
;

_publ_contact_author_email        czlu@fjirsm.ac.cn,rongminyu@fjirsm.ac.cn
_publ_contact_author_phone        (+86)-591-63173162   

#================================================================end    
data_compound2
 
_audit_creation_method            'SHELXL-2014/7'
_shelx_SHELXL_version_number      '2014/7'
_chemical_name_systematic         ?
_chemical_name_common             ?
_chemical_melting_point           ?
_chemical_formula_moiety          ?
_chemical_formula_sum
 'C90 H72 Ag2 Br2 P6' 
_chemical_formula_weight          1714.85

loop_
 _atom_type_symbol
 _atom_type_description
 _atom_type_scat_dispersion_real
 _atom_type_scat_dispersion_imag
 _atom_type_scat_source
 'C'  'C'   0.0181   0.0091
 'International Tables Vol C Tables 4.2.6.8 and 6.1.1.4'
 'H'  'H'   0.0000   0.0000
 'International Tables Vol C Tables 4.2.6.8 and 6.1.1.4'
 'P'  'P'   0.2955   0.4335
 'International Tables Vol C Tables 4.2.6.8 and 6.1.1.4'
 'Ag'  'Ag'   0.1306   4.2820
 'International Tables Vol C Tables 4.2.6.8 and 6.1.1.4'
 'Br'  'Br'  -0.6763   1.2805
 'International Tables Vol C Tables 4.2.6.8 and 6.1.1.4'
 
_space_group_crystal_system       triclinic
_space_group_IT_number            2
_space_group_name_H-M_alt         'P -1'
_space_group_name_Hall            '-P 1'
 
_shelx_space_group_comment
;
The symmetry employed for this shelxl refinement is uniquely defined
by the following loop, which should always be used as a source of
symmetry information in preference to the above space-group names.
They are only intended as comments.
;
 
loop_
 _space_group_symop_operation_xyz
 'x, y, z'
 '-x, -y, -z'
 
_cell_length_a                    11.5439(5)
_cell_length_b                    12.3705(3)
_cell_length_c                    15.2295(6)
_cell_angle_alpha                 100.985(3)
_cell_angle_beta                  109.494(4)
_cell_angle_gamma                 101.165(3)
_cell_volume                      1933.29(13)
_cell_formula_units_Z             1
_cell_measurement_temperature     100(2)
_cell_measurement_reflns_used   8973
_cell_measurement_theta_min     3.1650
_cell_measurement_theta_max     76.3560
 
_exptl_crystal_description        block 
_exptl_crystal_colour             yellow 
_exptl_crystal_density_meas       ?
_exptl_crystal_density_method     ?
_exptl_crystal_density_diffrn     1.473          
_exptl_crystal_F_000              866
_exptl_transmission_factor_min    ?
_exptl_transmission_factor_max    ?
_exptl_crystal_size_max           0.250
_exptl_crystal_size_mid           0.100
_exptl_crystal_size_min           0.040
_exptl_absorpt_coefficient_mu     6.798
_shelx_estimated_absorpt_T_min    0.281
_shelx_estimated_absorpt_T_max    0.773
_exptl_absorpt_correction_type    multi-scan 
_exptl_absorpt_correction_T_min   0.464 
_exptl_absorpt_correction_T_max   0.773 
_exptl_absorpt_process_details    
;
CrysAlisPro, Agilent Technologies,
Version 1.171.37.35 (release 13-08-2014 CrysAlis171 .NET)
(compiled Aug 13 2014,18:06:01)
Empirical absorption correction using spherical harmonics,
 implemented in SCALE3 ABSPACK scaling algorithm.
;
 
_exptl_special_details 
;
CrysAlisPro, Agilent Technologies,
Version 1.171.36.32 (release 02-08-2013 CrysAlis171 .NET)
(compiled Aug  2 2013,16:46:58)
Empirical absorption correction using spherical harmonics,
 implemented in SCALE3 ABSPACK scaling algorithm.
;
_exptl_absorpt_special_details    ?
_diffrn_ambient_temperature       100(2)
_diffrn_radiation_wavelength      1.54184
_diffrn_radiation_type            CuK\a
_diffrn_radiation_source 'SuperNova (Cu) X-ray Source'
_diffrn_radiation_monochromator 'mirror'
_diffrn_measurement_device_type 'SuperNova, Dual, Cu at zero, Atlas'
_diffrn_detector_area_resol_mean 10.3503
_diffrn_measurement_method        '\w scans'  
_diffrn_reflns_number             13185
_diffrn_reflns_av_unetI/netI      0.0276
_diffrn_reflns_av_R_equivalents   0.0209
_diffrn_reflns_limit_h_min        -14
_diffrn_reflns_limit_h_max        12
_diffrn_reflns_limit_k_min        -8
_diffrn_reflns_limit_k_max        15
_diffrn_reflns_limit_l_min        -18
_diffrn_reflns_limit_l_max        19
_diffrn_reflns_theta_min          3.203
_diffrn_reflns_theta_max          76.319
_diffrn_reflns_theta_full         67.684
_diffrn_measured_fraction_theta_max   0.965
_diffrn_measured_fraction_theta_full  1.000
_diffrn_reflns_Laue_measured_fraction_max    0.965
_diffrn_reflns_Laue_measured_fraction_full   1.000
_diffrn_reflns_point_group_measured_fraction_max   0.965
_diffrn_reflns_point_group_measured_fraction_full  1.000
_reflns_number_total              7840
_reflns_number_gt                 7371
_reflns_threshold_expression      'I > 2\s(I)'
_reflns_Friedel_coverage          0.000
_reflns_Friedel_fraction_max      .
_reflns_Friedel_fraction_full     .
 
_reflns_special_details
;
 Reflections were merged by SHELXL according to the crystal
 class for the calculation of statistics and refinement.
 
 _reflns_Friedel_fraction is defined as the number of unique
 Friedel pairs measured divided by the number that would be
 possible theoretically, ignoring centric projections and
 systematic absences.
;
 
_computing_data_collection        
;
CrysAlisPro, Agilent Technologies,
Version 1.171.36.32 (release 02-08-2013 CrysAlis171 .NET)
(compiled Aug  2 2013,16:46:58)
;
_computing_cell_refinement        
;
CrysAlisPro, Agilent Technologies,
Version 1.171.36.32 (release 02-08-2013 CrysAlis171 .NET)
(compiled Aug  2 2013,16:46:58)
; 
_computing_data_reduction         
;
CrysAlisPro, Agilent Technologies,
Version 1.171.36.32 (release 02-08-2013 CrysAlis171 .NET)
(compiled Aug  2 2013,16:46:58)
;
_computing_structure_solution   'SHELXS-2014/7 (Sheldrick, 2014)'
_computing_structure_refinement 'SHELXL-2014/7 (Sheldrick, 2014)'
_computing_molecular_graphics     ?
_computing_publication_material   ?
_refine_special_details           ?
_refine_ls_structure_factor_coef  Fsqd
_refine_ls_matrix_type            full
_refine_ls_weighting_scheme       calc
_refine_ls_weighting_details
'w=1/[\s^2^(Fo^2^)+(0.0370P)^2^+0.9258P] where P=(Fo^2^+2Fc^2^)/3'
_atom_sites_solution_primary      ?
_atom_sites_solution_secondary    ?
_atom_sites_solution_hydrogens    geom
_refine_ls_hydrogen_treatment     constr
_refine_ls_extinction_method      none
_refine_ls_extinction_coef        .
_refine_ls_number_reflns          7840
_refine_ls_number_parameters      451
_refine_ls_number_restraints      0
_refine_ls_R_factor_all           0.0274
_refine_ls_R_factor_gt            0.0253
_refine_ls_wR_factor_ref          0.0668
_refine_ls_wR_factor_gt           0.0649
_refine_ls_goodness_of_fit_ref    1.025
_refine_ls_restrained_S_all       1.025
_refine_ls_shift/su_max           0.001
_refine_ls_shift/su_mean          0.000
 
loop_
 _atom_site_label
 _atom_site_type_symbol
 _atom_site_fract_x
 _atom_site_fract_y
 _atom_site_fract_z
 _atom_site_U_iso_or_equiv
 _atom_site_adp_type
 _atom_site_occupancy
 _atom_site_site_symmetry_order  
 _atom_site_calc_flag
 _atom_site_refinement_flags_posn
 _atom_site_refinement_flags_adp
 _atom_site_refinement_flags_occupancy
 _atom_site_disorder_assembly
 _atom_site_disorder_group
Ag1 Ag 0.32954(2) 0.34120(2) 0.68048(2) 0.01494(5) Uani 1 1 d . . . . .
Br1 Br 0.14436(2) 0.40467(2) 0.72869(2) 0.02071(6) Uani 1 1 d . . . . .
P1 P 0.42003(5) 0.26800(4) 0.82805(3) 0.01302(10) Uani 1 1 d . . . . .
P2 P 0.50926(5) 0.51424(4) 0.79210(3) 0.01216(10) Uani 1 1 d . . . . .
P3 P 0.27649(5) 0.23389(4) 0.51639(3) 0.01238(10) Uani 1 1 d . . . . .
C1 C 0.46597(18) 0.39877(17) 0.92554(14) 0.0120(4) Uani 1 1 d . . . . .
C2 C 0.50346(18) 0.50629(17) 0.90951(14) 0.0122(4) Uani 1 1 d . . . . .
C3 C 0.46264(18) 0.39465(17) 1.01559(14) 0.0126(4) Uani 1 1 d . . . . .
H3A H 0.4365 0.3222 1.0261 0.015 Uiso 1 1 calc R U . . .
C4 C 0.5711(2) 0.23226(18) 0.84796(17) 0.0203(4) Uani 1 1 d . . . . .
C5 C 0.5879(3) 0.1753(2) 0.7669(2) 0.0330(6) Uani 1 1 d . . . . .
H5A H 0.5214 0.1552 0.7046 0.040 Uiso 1 1 calc R U . . .
C6 C 0.7023(4) 0.1478(3) 0.7771(3) 0.0561(11) Uani 1 1 d . . . . .
H6A H 0.7138 0.1090 0.7218 0.067 Uiso 1 1 calc R U . . .
C7 C 0.7991(3) 0.1769(3) 0.8677(4) 0.0588(11) Uani 1 1 d . . . . .
H7A H 0.8769 0.1578 0.8746 0.071 Uiso 1 1 calc R U . . .
C8 C 0.7834(3) 0.2334(3) 0.9479(3) 0.0483(9) Uani 1 1 d . . . . .
H8A H 0.8505 0.2531 1.0099 0.058 Uiso 1 1 calc R U . . .
C9 C 0.6701(2) 0.2619(2) 0.9390(2) 0.0307(5) Uani 1 1 d . . . . .
H9A H 0.6600 0.3015 0.9947 0.037 Uiso 1 1 calc R U . . .
C10 C 0.32690(19) 0.16070(17) 0.86404(14) 0.0151(4) Uani 1 1 d . . . . .
C11 C 0.3794(2) 0.09476(19) 0.92291(17) 0.0226(4) Uani 1 1 d . . . . .
H11A H 0.4689 0.1039 0.9463 0.027 Uiso 1 1 calc R U . . .
C12 C 0.3012(2) 0.0156(2) 0.94761(18) 0.0263(5) Uani 1 1 d . . . . .
H12A H 0.3378 -0.0283 0.9885 0.032 Uiso 1 1 calc R U . . .
C13 C 0.1715(2) 0.0008(2) 0.91306(19) 0.0308(5) Uani 1 1 d . . . . .
H13A H 0.1183 -0.0528 0.9303 0.037 Uiso 1 1 calc R U . . .
C14 C 0.1184(2) 0.0646(3) 0.8529(2) 0.0406(7) Uani 1 1 d . . . . .
H14A H 0.0285 0.0534 0.8282 0.049 Uiso 1 1 calc R U . . .
C15 C 0.1956(2) 0.1446(2) 0.82844(19) 0.0310(5) Uani 1 1 d . . . . .
H15A H 0.1585 0.1881 0.7874 0.037 Uiso 1 1 calc R U . . .
C16 C 0.5067(2) 0.66133(17) 0.79336(14) 0.0156(4) Uani 1 1 d . . . . .
C17 C 0.6103(2) 0.74417(19) 0.79781(16) 0.0214(4) Uani 1 1 d . . . . .
H17A H 0.6884 0.7263 0.8034 0.026 Uiso 1 1 calc R U . . .
C18 C 0.5994(2) 0.8536(2) 0.79410(18) 0.0275(5) Uani 1 1 d . . . . .
H18A H 0.6698 0.9099 0.7960 0.033 Uiso 1 1 calc R U . . .
C19 C 0.4869(3) 0.8809(2) 0.78760(18) 0.0291(5) Uani 1 1 d . . . . .
H19A H 0.4804 0.9559 0.7858 0.035 Uiso 1 1 calc R U . . .
C20 C 0.3833(2) 0.7987(2) 0.78373(17) 0.0264(5) Uani 1 1 d . . . . .
H20A H 0.3062 0.8177 0.7797 0.032 Uiso 1 1 calc R U . . .
C21 C 0.3921(2) 0.68855(19) 0.78573(16) 0.0206(4) Uani 1 1 d . . . . .
H21A H 0.3206 0.6320 0.7819 0.025 Uiso 1 1 calc R U . . .
C22 C 0.6722(2) 0.51000(18) 0.81079(15) 0.0162(4) Uani 1 1 d . . . . .
C23 C 0.6951(2) 0.44675(19) 0.73516(16) 0.0215(4) Uani 1 1 d . . . . .
H23A H 0.6271 0.4116 0.6738 0.026 Uiso 1 1 calc R U . . .
C24 C 0.8173(2) 0.4349(2) 0.74923(19) 0.0283(5) Uani 1 1 d . . . . .
H24A H 0.8324 0.3921 0.6974 0.034 Uiso 1 1 calc R U . . .
C25 C 0.9163(2) 0.4855(2) 0.8385(2) 0.0289(5) Uani 1 1 d . . . . .
H25A H 0.9991 0.4763 0.8484 0.035 Uiso 1 1 calc R U . . .
C26 C 0.8948(2) 0.5498(2) 0.91384(18) 0.0265(5) Uani 1 1 d . . . . .
H26A H 0.9635 0.5855 0.9748 0.032 Uiso 1 1 calc R U . . .
C27 C 0.7740(2) 0.5621(2) 0.90070(16) 0.0209(4) Uani 1 1 d . . . . .
H27A H 0.7600 0.6059 0.9527 0.025 Uiso 1 1 calc R U . . .
C28 C 0.16538(19) 0.27759(17) 0.42267(14) 0.0151(4) Uani 1 1 d . . . . .
C29 C 0.0910(2) 0.34311(19) 0.44941(16) 0.0194(4) Uani 1 1 d . . . . .
H29A H 0.1024 0.3671 0.5155 0.023 Uiso 1 1 calc R U . . .
C30 C -0.0001(2) 0.3736(2) 0.37955(18) 0.0256(5) Uani 1 1 d . . . . .
H30A H -0.0510 0.4179 0.3981 0.031 Uiso 1 1 calc R U . . .
C31 C -0.0165(2) 0.3395(2) 0.28314(18) 0.0269(5) Uani 1 1 d . . . . .
H31A H -0.0797 0.3593 0.2355 0.032 Uiso 1 1 calc R U . . .
C32 C 0.0589(2) 0.2765(2) 0.25609(16) 0.0242(5) Uani 1 1 d . . . . .
H32A H 0.0485 0.2543 0.1900 0.029 Uiso 1 1 calc R U . . .
C33 C 0.1499(2) 0.24558(18) 0.32529(15) 0.0193(4) Uani 1 1 d . . . . .
H33A H 0.2018 0.2026 0.3065 0.023 Uiso 1 1 calc R U . . .
C34 C 0.41599(19) 0.24200(18) 0.48415(14) 0.0149(4) Uani 1 1 d . . . . .
C35 C 0.4823(2) 0.15913(19) 0.49326(15) 0.0190(4) Uani 1 1 d . . . . .
H35A H 0.4480 0.0914 0.5074 0.023 Uiso 1 1 calc R U . . .
C36 C 0.5985(2) 0.1752(2) 0.48174(17) 0.0244(5) Uani 1 1 d . . . . .
H36A H 0.6431 0.1183 0.4877 0.029 Uiso 1 1 calc R U . . .
C37 C 0.6493(2) 0.2744(2) 0.46159(16) 0.0242(5) Uani 1 1 d . . . . .
H37A H 0.7291 0.2857 0.4545 0.029 Uiso 1 1 calc R U . . .
C38 C 0.5836(2) 0.3567(2) 0.45179(15) 0.0217(4) Uani 1 1 d . . . . .
H38A H 0.6180 0.4242 0.4374 0.026 Uiso 1 1 calc R U . . .
C39 C 0.4675(2) 0.34095(19) 0.46291(15) 0.0181(4) Uani 1 1 d . . . . .
H39A H 0.4227 0.3977 0.4560 0.022 Uiso 1 1 calc R U . . .
C40 C 0.20430(18) 0.08054(17) 0.49266(14) 0.0142(4) Uani 1 1 d . . . . .
C41 C 0.18487(19) 0.04092(19) 0.56779(15) 0.0179(4) Uani 1 1 d . . . . .
H41A H 0.2121 0.0930 0.6301 0.022 Uiso 1 1 calc R U . . .
C42 C 0.1259(2) -0.07424(19) 0.55241(16) 0.0208(4) Uani 1 1 d . . . . .
H42A H 0.1140 -0.1007 0.6042 0.025 Uiso 1 1 calc R U . . .
C43 C 0.0848(2) -0.15007(19) 0.46142(17) 0.0203(4) Uani 1 1 d . . . . .
H43A H 0.0436 -0.2285 0.4505 0.024 Uiso 1 1 calc R U . . .
C44 C 0.1037(2) -0.11132(19) 0.38598(16) 0.0201(4) Uani 1 1 d . . . . .
H44A H 0.0754 -0.1635 0.3236 0.024 Uiso 1 1 calc R U . . .
C45 C 0.1636(2) 0.00280(18) 0.40132(15) 0.0173(4) Uani 1 1 d . . . . .
H45A H 0.1772 0.0285 0.3497 0.021 Uiso 1 1 calc R U . . .
 
loop_
 _atom_site_aniso_label
 _atom_site_aniso_U_11
 _atom_site_aniso_U_22
 _atom_site_aniso_U_33
 _atom_site_aniso_U_23
 _atom_site_aniso_U_13
 _atom_site_aniso_U_12
Ag1 0.01693(8) 0.01739(8) 0.00951(7) 0.00153(5) 0.00495(5) 0.00497(6)
Br1 0.01924(11) 0.02147(12) 0.02384(12) 0.00394(9) 0.01136(9) 0.00776(9)
P1 0.0180(2) 0.0115(2) 0.0098(2) 0.00203(17) 0.00630(18) 0.00384(18)
P2 0.0156(2) 0.0133(2) 0.0086(2) 0.00349(17) 0.00603(18) 0.00346(18)
P3 0.0140(2) 0.0141(2) 0.0097(2) 0.00328(17) 0.00489(18) 0.00478(18)
C1 0.0131(9) 0.0129(9) 0.0093(8) 0.0018(7) 0.0042(7) 0.0035(7)
C2 0.0127(9) 0.0160(9) 0.0100(8) 0.0054(7) 0.0053(7) 0.0053(7)
C3 0.0152(9) 0.0128(9) 0.0108(9) 0.0049(7) 0.0055(7) 0.0036(7)
C4 0.0239(11) 0.0142(10) 0.0325(12) 0.0122(9) 0.0177(9) 0.0085(8)
C5 0.0499(16) 0.0252(12) 0.0487(16) 0.0182(11) 0.0395(14) 0.0204(12)
C6 0.077(2) 0.0386(17) 0.107(3) 0.0383(19) 0.081(3) 0.0365(17)
C7 0.0409(17) 0.0430(18) 0.132(4) 0.052(2) 0.058(2) 0.0292(15)
C8 0.0208(13) 0.0351(15) 0.094(3) 0.0324(17) 0.0179(15) 0.0121(11)
C9 0.0211(11) 0.0266(12) 0.0451(15) 0.0141(11) 0.0096(11) 0.0095(10)
C10 0.0194(10) 0.0116(9) 0.0113(9) 0.0008(7) 0.0052(8) 0.0013(7)
C11 0.0220(11) 0.0210(11) 0.0274(11) 0.0113(9) 0.0098(9) 0.0066(9)
C12 0.0314(12) 0.0221(11) 0.0279(12) 0.0144(9) 0.0105(10) 0.0072(10)
C13 0.0286(12) 0.0276(12) 0.0351(13) 0.0153(11) 0.0126(11) -0.0018(10)
C14 0.0191(12) 0.0519(17) 0.0521(17) 0.0303(15) 0.0103(12) 0.0034(11)
C15 0.0223(11) 0.0371(14) 0.0352(14) 0.0218(11) 0.0080(10) 0.0056(10)
C16 0.0243(10) 0.0142(9) 0.0086(8) 0.0040(7) 0.0068(8) 0.0042(8)
C17 0.0257(11) 0.0205(11) 0.0199(10) 0.0070(8) 0.0116(9) 0.0039(9)
C18 0.0359(13) 0.0191(11) 0.0271(12) 0.0076(9) 0.0143(10) 0.0019(10)
C19 0.0470(15) 0.0171(11) 0.0284(12) 0.0097(9) 0.0171(11) 0.0123(10)
C20 0.0341(13) 0.0247(12) 0.0274(12) 0.0118(9) 0.0144(10) 0.0146(10)
C21 0.0247(11) 0.0217(11) 0.0183(10) 0.0069(8) 0.0103(9) 0.0078(9)
C22 0.0188(10) 0.0166(10) 0.0171(10) 0.0083(8) 0.0098(8) 0.0048(8)
C23 0.0231(11) 0.0223(11) 0.0216(11) 0.0037(9) 0.0141(9) 0.0043(9)
C24 0.0315(13) 0.0278(12) 0.0378(14) 0.0106(10) 0.0251(11) 0.0124(10)
C25 0.0229(11) 0.0339(13) 0.0441(15) 0.0228(12) 0.0208(11) 0.0135(10)
C26 0.0197(11) 0.0345(13) 0.0264(12) 0.0153(10) 0.0072(9) 0.0063(9)
C27 0.0189(10) 0.0270(11) 0.0182(10) 0.0076(9) 0.0085(8) 0.0054(9)
C28 0.0147(9) 0.0153(9) 0.0142(9) 0.0056(7) 0.0044(7) 0.0026(8)
C29 0.0199(10) 0.0226(11) 0.0207(10) 0.0097(8) 0.0105(8) 0.0079(8)
C30 0.0247(11) 0.0307(12) 0.0335(13) 0.0184(10) 0.0161(10) 0.0161(10)
C31 0.0216(11) 0.0314(13) 0.0275(12) 0.0175(10) 0.0037(9) 0.0084(10)
C32 0.0268(11) 0.0262(12) 0.0164(10) 0.0099(9) 0.0034(9) 0.0050(9)
C33 0.0231(10) 0.0198(10) 0.0161(10) 0.0068(8) 0.0069(8) 0.0078(8)
C34 0.0153(9) 0.0195(10) 0.0081(8) 0.0024(7) 0.0036(7) 0.0039(8)
C35 0.0181(10) 0.0218(11) 0.0194(10) 0.0086(8) 0.0081(8) 0.0061(8)
C36 0.0203(11) 0.0307(12) 0.0282(12) 0.0105(10) 0.0122(9) 0.0124(9)
C37 0.0169(10) 0.0351(13) 0.0227(11) 0.0080(10) 0.0109(9) 0.0061(9)
C38 0.0226(11) 0.0245(11) 0.0177(10) 0.0070(8) 0.0096(9) 0.0021(9)
C39 0.0199(10) 0.0210(10) 0.0136(9) 0.0043(8) 0.0068(8) 0.0056(8)
C40 0.0118(9) 0.0155(9) 0.0163(9) 0.0049(8) 0.0058(7) 0.0049(7)
C41 0.0174(10) 0.0221(11) 0.0147(9) 0.0054(8) 0.0063(8) 0.0058(8)
C42 0.0190(10) 0.0231(11) 0.0236(11) 0.0112(9) 0.0101(9) 0.0052(9)
C43 0.0142(9) 0.0177(10) 0.0281(11) 0.0070(9) 0.0074(8) 0.0028(8)
C44 0.0164(10) 0.0209(11) 0.0196(10) 0.0018(8) 0.0050(8) 0.0046(8)
C45 0.0192(10) 0.0201(10) 0.0148(10) 0.0053(8) 0.0080(8) 0.0069(8)
 
_geom_special_details
;
 All esds (except the esd in the dihedral angle between two l.s. planes)
 are estimated using the full covariance matrix.  The cell esds are taken
 into account individually in the estimation of esds in distances, angles
 and torsion angles; correlations between esds in cell parameters are only
 used when they are defined by crystal symmetry.  An approximate (isotropic)
 treatment of cell esds is used for estimating esds involving l.s. planes.
;
 
loop_
 _geom_bond_atom_site_label_1
 _geom_bond_atom_site_label_2
 _geom_bond_distance
 _geom_bond_site_symmetry_2
 _geom_bond_publ_flag
Ag1 P3 2.4046(5) . ?
Ag1 P2 2.5131(5) . ?
Ag1 P1 2.5568(5) . ?
Ag1 Br1 2.6838(3) . ?
Ag1 Ag1 8.9173(6) 2_667 ?
P1 C4 1.823(2) . ?
P1 C1 1.825(2) . ?
P1 C10 1.826(2) . ?
P2 C22 1.819(2) . ?
P2 C16 1.822(2) . ?
P2 C2 1.8319(19) . ?
P3 C28 1.821(2) . ?
P3 C34 1.824(2) . ?
P3 C40 1.830(2) . ?
C1 C3 1.395(3) . ?
C1 C2 1.410(3) . ?
C2 C3 1.393(3) 2_667 ?
C3 C2 1.393(3) 2_667 ?
C4 C5 1.393(3) . ?
C4 C9 1.396(3) . ?
C5 C6 1.393(4) . ?
C6 C7 1.381(6) . ?
C7 C8 1.372(5) . ?
C8 C9 1.390(3) . ?
C10 C15 1.387(3) . ?
C10 C11 1.394(3) . ?
C11 C12 1.393(3) . ?
C12 C13 1.373(3) . ?
C13 C14 1.387(4) . ?
C14 C15 1.390(3) . ?
C16 C17 1.389(3) . ?
C16 C21 1.401(3) . ?
C17 C18 1.394(3) . ?
C18 C19 1.381(4) . ?
C19 C20 1.388(4) . ?
C20 C21 1.391(3) . ?
C22 C23 1.396(3) . ?
C22 C27 1.403(3) . ?
C23 C24 1.396(3) . ?
C24 C25 1.381(4) . ?
C25 C26 1.388(4) . ?
C26 C27 1.385(3) . ?
C28 C29 1.392(3) . ?
C28 C33 1.400(3) . ?
C29 C30 1.393(3) . ?
C30 C31 1.385(3) . ?
C31 C32 1.384(3) . ?
C32 C33 1.389(3) . ?
C34 C35 1.394(3) . ?
C34 C39 1.398(3) . ?
C35 C36 1.391(3) . ?
C36 C37 1.389(3) . ?
C37 C38 1.385(3) . ?
C38 C39 1.388(3) . ?
C40 C41 1.394(3) . ?
C40 C45 1.400(3) . ?
C41 C42 1.392(3) . ?
C42 C43 1.385(3) . ?
C43 C44 1.391(3) . ?
C44 C45 1.384(3) . ?
 
loop_
 _geom_angle_atom_site_label_1
 _geom_angle_atom_site_label_2
 _geom_angle_atom_site_label_3
 _geom_angle
 _geom_angle_site_symmetry_1
 _geom_angle_site_symmetry_3
 _geom_angle_publ_flag
P3 Ag1 P2 132.037(17) . . ?
P3 Ag1 P1 123.855(17) . . ?
P2 Ag1 P1 79.159(16) . . ?
P3 Ag1 Br1 118.685(14) . . ?
P2 Ag1 Br1 96.686(13) . . ?
P1 Ag1 Br1 95.769(13) . . ?
P3 Ag1 Ag1 166.682(12) . 2_667 ?
P2 Ag1 Ag1 45.537(11) . 2_667 ?
P1 Ag1 Ag1 45.522(11) . 2_667 ?
Br1 Ag1 Ag1 73.448(7) . 2_667 ?
C4 P1 C1 102.62(10) . . ?
C4 P1 C10 104.83(10) . . ?
C1 P1 C10 103.69(9) . . ?
C4 P1 Ag1 117.14(7) . . ?
C1 P1 Ag1 100.37(6) . . ?
C10 P1 Ag1 124.86(7) . . ?
C22 P2 C16 106.04(10) . . ?
C22 P2 C2 101.60(9) . . ?
C16 P2 C2 102.48(9) . . ?
C22 P2 Ag1 118.09(7) . . ?
C16 P2 Ag1 123.90(7) . . ?
C2 P2 Ag1 100.77(6) . . ?
C28 P3 C34 104.28(9) . . ?
C28 P3 C40 104.87(9) . . ?
C34 P3 C40 104.93(9) . . ?
C28 P3 Ag1 115.78(7) . . ?
C34 P3 Ag1 112.80(6) . . ?
C40 P3 Ag1 113.14(7) . . ?
C3 C1 C2 119.09(18) . . ?
C3 C1 P1 121.19(15) . . ?
C2 C1 P1 119.70(14) . . ?
C3 C2 C1 119.02(17) 2_667 . ?
C3 C2 P2 120.95(15) 2_667 . ?
C1 C2 P2 120.02(15) . . ?
C2 C3 C1 121.88(18) 2_667 . ?
C5 C4 C9 119.3(2) . . ?
C5 C4 P1 117.3(2) . . ?
C9 C4 P1 123.32(18) . . ?
C4 C5 C6 120.1(3) . . ?
C7 C6 C5 120.0(3) . . ?
C8 C7 C6 120.3(3) . . ?
C7 C8 C9 120.5(3) . . ?
C8 C9 C4 119.8(3) . . ?
C15 C10 C11 119.2(2) . . ?
C15 C10 P1 116.56(16) . . ?
C11 C10 P1 124.22(16) . . ?
C12 C11 C10 120.4(2) . . ?
C13 C12 C11 120.1(2) . . ?
C12 C13 C14 119.7(2) . . ?
C13 C14 C15 120.6(2) . . ?
C10 C15 C14 119.9(2) . . ?
C17 C16 C21 119.8(2) . . ?
C17 C16 P2 123.06(17) . . ?
C21 C16 P2 117.13(16) . . ?
C16 C17 C18 119.8(2) . . ?
C19 C18 C17 120.5(2) . . ?
C18 C19 C20 120.0(2) . . ?
C19 C20 C21 120.2(2) . . ?
C20 C21 C16 119.8(2) . . ?
C23 C22 C27 119.0(2) . . ?
C23 C22 P2 118.88(16) . . ?
C27 C22 P2 121.97(16) . . ?
C22 C23 C24 120.4(2) . . ?
C25 C24 C23 120.0(2) . . ?
C24 C25 C26 120.0(2) . . ?
C27 C26 C25 120.4(2) . . ?
C26 C27 C22 120.1(2) . . ?
C29 C28 C33 119.18(19) . . ?
C29 C28 P3 118.09(15) . . ?
C33 C28 P3 122.71(16) . . ?
C28 C29 C30 120.3(2) . . ?
C31 C30 C29 120.1(2) . . ?
C32 C31 C30 120.1(2) . . ?
C31 C32 C33 120.2(2) . . ?
C32 C33 C28 120.2(2) . . ?
C35 C34 C39 119.14(19) . . ?
C35 C34 P3 121.23(16) . . ?
C39 C34 P3 119.03(15) . . ?
C36 C35 C34 120.3(2) . . ?
C37 C36 C35 120.1(2) . . ?
C38 C37 C36 120.0(2) . . ?
C37 C38 C39 120.2(2) . . ?
C38 C39 C34 120.3(2) . . ?
C41 C40 C45 119.02(19) . . ?
C41 C40 P3 118.39(16) . . ?
C45 C40 P3 122.54(15) . . ?
C42 C41 C40 120.6(2) . . ?
C43 C42 C41 119.8(2) . . ?
C42 C43 C44 120.0(2) . . ?
C45 C44 C43 120.3(2) . . ?
C44 C45 C40 120.24(19) . . ?
 
_refine_diff_density_max    0.378
_refine_diff_density_min   -0.871
_refine_diff_density_rms    0.074

_shelx_res_file
;

    xl.res created by SHELXL-2014/7


TITL xl in P-1
CELL 1.54184  11.5439  12.3705  15.2295 100.985 109.494 101.165
ZERR   1.00   0.0005   0.0003   0.0006   0.003   0.004   0.003
LATT  1
SFAC C H P Ag Br
UNIT 90 72 6 2 2

L.S. 4
temp -173
size 0.25 0.10 0.04
eqiv $1 1-x,1-y, 2-z
mpla P1 Ag1 P2
mpla Br1 Ag1 P3
mpla P1_$1 Ag1_$1 P2_$1
mpla P1 Ag1 P2
mpla 6 c1 c2 c3 c1_$1 c2_$1 c3_$1 P1 P2 P1_$1 P2_$1 ag1 ag1_$1
mpla 10 c1 c2 c3 c1_$1 c2_$1 c3_$1 P1 P2 P1_$1 P2_$1 ag1 ag1_$1
mpla P1 Ag1 P2
bind Ag1 Ag1_$1
BOND
FMAP 2
acta
PLAN 10

WGHT    0.037000    0.925800
FVAR       0.44428
AG1   4    0.329538    0.341204    0.680480    11.00000    0.01693    0.01739 =
         0.00951    0.00153    0.00495    0.00497
BR1   5    0.144360    0.404670    0.728691    11.00000    0.01924    0.02147 =
         0.02384    0.00394    0.01136    0.00776
P1    3    0.420030    0.268004    0.828051    11.00000    0.01798    0.01154 =
         0.00979    0.00203    0.00630    0.00384
P2    3    0.509262    0.514237    0.792104    11.00000    0.01558    0.01332 =
         0.00863    0.00349    0.00603    0.00346
P3    3    0.276492    0.233887    0.516390    11.00000    0.01404    0.01406 =
         0.00969    0.00328    0.00489    0.00478
C1    1    0.465975    0.398775    0.925537    11.00000    0.01310    0.01294 =
         0.00925    0.00181    0.00421    0.00346
C2    1    0.503456    0.506290    0.909512    11.00000    0.01275    0.01605 =
         0.00998    0.00535    0.00531    0.00531
C3    1    0.462642    0.394646    1.015590    11.00000    0.01521    0.01282 =
         0.01081    0.00493    0.00550    0.00356
AFIX  43
H3A   2    0.436501    0.322193    1.026125    11.00000   -1.20000
AFIX   0
C4    1    0.571082    0.232262    0.847963    11.00000    0.02391    0.01423 =
         0.03251    0.01224    0.01774    0.00848
C5    1    0.587937    0.175300    0.766902    11.00000    0.04995    0.02522 =
         0.04874    0.01823    0.03954    0.02036
AFIX  43
H5A   2    0.521363    0.155185    0.704580    11.00000   -1.20000
AFIX   0
C6    1    0.702346    0.147799    0.777144    11.00000    0.07710    0.03855 =
         0.10719    0.03830    0.08098    0.03653
AFIX  43
H6A   2    0.713792    0.109001    0.721818    11.00000   -1.20000
AFIX   0
C7    1    0.799087    0.176946    0.867721    11.00000    0.04089    0.04296 =
         0.13244    0.05153    0.05770    0.02917
AFIX  43
H7A   2    0.876885    0.157828    0.874573    11.00000   -1.20000
AFIX   0
C8    1    0.783393    0.233385    0.947871    11.00000    0.02077    0.03515 =
         0.09402    0.03244    0.01791    0.01215
AFIX  43
H8A   2    0.850457    0.253122    1.009918    11.00000   -1.20000
AFIX   0
C9    1    0.670064    0.261911    0.938964    11.00000    0.02110    0.02656 =
         0.04510    0.01413    0.00963    0.00948
AFIX  43
H9A   2    0.660027    0.301488    0.994685    11.00000   -1.20000
AFIX   0
C10   1    0.326905    0.160698    0.864036    11.00000    0.01938    0.01158 =
         0.01134    0.00078    0.00516    0.00128
C11   1    0.379357    0.094756    0.922905    11.00000    0.02198    0.02099 =
         0.02735    0.01127    0.00980    0.00663
AFIX  43
H11A  2    0.468935    0.103900    0.946311    11.00000   -1.20000
AFIX   0
C12   1    0.301232    0.015562    0.947609    11.00000    0.03137    0.02212 =
         0.02794    0.01437    0.01052    0.00719
AFIX  43
H12A  2    0.337793   -0.028347    0.988457    11.00000   -1.20000
AFIX   0
C13   1    0.171505    0.000809    0.913063    11.00000    0.02858    0.02765 =
         0.03506    0.01534    0.01258   -0.00181
AFIX  43
H13A  2    0.118290   -0.052841    0.930279    11.00000   -1.20000
AFIX   0
C14   1    0.118446    0.064550    0.852922    11.00000    0.01913    0.05189 =
         0.05213    0.03028    0.01030    0.00340
AFIX  43
H14A  2    0.028515    0.053427    0.828221    11.00000   -1.20000
AFIX   0
C15   1    0.195580    0.144551    0.828440    11.00000    0.02225    0.03709 =
         0.03523    0.02184    0.00798    0.00563
AFIX  43
H15A  2    0.158459    0.188074    0.787427    11.00000   -1.20000
AFIX   0
C16   1    0.506717    0.661330    0.793362    11.00000    0.02431    0.01422 =
         0.00855    0.00403    0.00680    0.00425
C17   1    0.610345    0.744169    0.797812    11.00000    0.02568    0.02053 =
         0.01988    0.00702    0.01156    0.00392
AFIX  43
H17A  2    0.688447    0.726280    0.803369    11.00000   -1.20000
AFIX   0
C18   1    0.599353    0.853622    0.794097    11.00000    0.03591    0.01906 =
         0.02712    0.00762    0.01430    0.00190
AFIX  43
H18A  2    0.669770    0.909851    0.796050    11.00000   -1.20000
AFIX   0
C19   1    0.486876    0.880894    0.787601    11.00000    0.04701    0.01708 =
         0.02842    0.00974    0.01712    0.01226
AFIX  43
H19A  2    0.480383    0.955894    0.785784    11.00000   -1.20000
AFIX   0
C20   1    0.383307    0.798708    0.783726    11.00000    0.03406    0.02473 =
         0.02738    0.01176    0.01440    0.01458
AFIX  43
H20A  2    0.306155    0.817727    0.779690    11.00000   -1.20000
AFIX   0
C21   1    0.392102    0.688546    0.785732    11.00000    0.02465    0.02169 =
         0.01827    0.00692    0.01026    0.00783
AFIX  43
H21A  2    0.320646    0.631995    0.781943    11.00000   -1.20000
AFIX   0
C22   1    0.672206    0.510002    0.810786    11.00000    0.01878    0.01661 =
         0.01715    0.00831    0.00984    0.00478
C23   1    0.695070    0.446751    0.735161    11.00000    0.02314    0.02230 =
         0.02156    0.00367    0.01413    0.00428
AFIX  43
H23A  2    0.627075    0.411552    0.673773    11.00000   -1.20000
AFIX   0
C24   1    0.817289    0.434932    0.749235    11.00000    0.03149    0.02784 =
         0.03783    0.01062    0.02513    0.01244
AFIX  43
H24A  2    0.832390    0.392104    0.697399    11.00000   -1.20000
AFIX   0
C25   1    0.916296    0.485489    0.838509    11.00000    0.02291    0.03394 =
         0.04411    0.02276    0.02079    0.01349
AFIX  43
H25A  2    0.999119    0.476280    0.848375    11.00000   -1.20000
AFIX   0
C26   1    0.894841    0.549759    0.913839    11.00000    0.01969    0.03448 =
         0.02644    0.01528    0.00717    0.00629
AFIX  43
H26A  2    0.963526    0.585518    0.974792    11.00000   -1.20000
AFIX   0
C27   1    0.773973    0.562073    0.900697    11.00000    0.01886    0.02696 =
         0.01818    0.00756    0.00848    0.00537
AFIX  43
H27A  2    0.759957    0.605875    0.952681    11.00000   -1.20000
AFIX   0
C28   1    0.165384    0.277592    0.422668    11.00000    0.01468    0.01535 =
         0.01421    0.00563    0.00444    0.00257
C29   1    0.091003    0.343109    0.449406    11.00000    0.01985    0.02261 =
         0.02067    0.00975    0.01051    0.00790
AFIX  43
H29A  2    0.102413    0.367114    0.515548    11.00000   -1.20000
AFIX   0
C30   1   -0.000105    0.373618    0.379554    11.00000    0.02471    0.03072 =
         0.03346    0.01837    0.01614    0.01613
AFIX  43
H30A  2   -0.051048    0.417913    0.398097    11.00000   -1.20000
AFIX   0
C31   1   -0.016542    0.339493    0.283142    11.00000    0.02161    0.03145 =
         0.02755    0.01751    0.00375    0.00839
AFIX  43
H31A  2   -0.079686    0.359348    0.235493    11.00000   -1.20000
AFIX   0
C32   1    0.058928    0.276472    0.256087    11.00000    0.02685    0.02623 =
         0.01636    0.00988    0.00344    0.00503
AFIX  43
H32A  2    0.048473    0.254298    0.190043    11.00000   -1.20000
AFIX   0
C33   1    0.149907    0.245583    0.325287    11.00000    0.02307    0.01984 =
         0.01610    0.00679    0.00694    0.00777
AFIX  43
H33A  2    0.201764    0.202620    0.306480    11.00000   -1.20000
AFIX   0
C34   1    0.415986    0.242003    0.484153    11.00000    0.01528    0.01951 =
         0.00811    0.00239    0.00359    0.00395
C35   1    0.482290    0.159131    0.493256    11.00000    0.01809    0.02182 =
         0.01940    0.00861    0.00812    0.00609
AFIX  43
H35A  2    0.448008    0.091375    0.507380    11.00000   -1.20000
AFIX   0
C36   1    0.598459    0.175235    0.481743    11.00000    0.02034    0.03067 =
         0.02816    0.01054    0.01223    0.01237
AFIX  43
H36A  2    0.643056    0.118319    0.487675    11.00000   -1.20000
AFIX   0
C37   1    0.649306    0.274396    0.461590    11.00000    0.01690    0.03506 =
         0.02274    0.00801    0.01089    0.00615
AFIX  43
H37A  2    0.729143    0.285736    0.454528    11.00000   -1.20000
AFIX   0
C38   1    0.583564    0.356741    0.451795    11.00000    0.02264    0.02453 =
         0.01775    0.00699    0.00957    0.00209
AFIX  43
H38A  2    0.618042    0.424237    0.437427    11.00000   -1.20000
AFIX   0
C39   1    0.467461    0.340946    0.462908    11.00000    0.01992    0.02100 =
         0.01357    0.00429    0.00684    0.00561
AFIX  43
H39A  2    0.422731    0.397685    0.456039    11.00000   -1.20000
AFIX   0
C40   1    0.204305    0.080538    0.492663    11.00000    0.01180    0.01546 =
         0.01629    0.00491    0.00582    0.00490
C41   1    0.184871    0.040921    0.567794    11.00000    0.01739    0.02215 =
         0.01467    0.00543    0.00632    0.00576
AFIX  43
H41A  2    0.212091    0.092958    0.630060    11.00000   -1.20000
AFIX   0
C42   1    0.125919   -0.074243    0.552414    11.00000    0.01899    0.02311 =
         0.02358    0.01117    0.01008    0.00517
AFIX  43
H42A  2    0.113953   -0.100750    0.604206    11.00000   -1.20000
AFIX   0
C43   1    0.084759   -0.150074    0.461423    11.00000    0.01416    0.01771 =
         0.02811    0.00704    0.00738    0.00284
AFIX  43
H43A  2    0.043612   -0.228521    0.450547    11.00000   -1.20000
AFIX   0
C44   1    0.103697   -0.111316    0.385979    11.00000    0.01637    0.02092 =
         0.01962    0.00179    0.00504    0.00465
AFIX  43
H44A  2    0.075356   -0.163458    0.323618    11.00000   -1.20000
AFIX   0
C45   1    0.163608    0.002801    0.401318    11.00000    0.01924    0.02009 =
         0.01480    0.00533    0.00804    0.00688
AFIX  43
H45A  2    0.177178    0.028502    0.349672    11.00000   -1.20000

AFIX   0
HKLF 4

REM  xl in P-1
REM R1 =  0.0253 for    7371 Fo > 4sig(Fo)  and  0.0274 for all    7840 data
REM    451 parameters refined using      0 restraints

END

WGHT      0.0370      0.9256

REM Highest difference peak  0.378,  deepest hole -0.871,  1-sigma level  0.074
Q1    1   0.3772  0.2112  0.8470  11.00000  0.05    0.38
Q2    1   0.5028  0.4999  0.8601  11.00000  0.05    0.35
Q3    1   0.3442  0.3397  0.5885  11.00000  0.05    0.34
Q4    1   0.4958  0.4522  0.9154  11.00000  0.05    0.34
Q5    1   0.5057  0.2424  0.8400  11.00000  0.05    0.34
Q6    1   0.2215  0.1406  0.4926  11.00000  0.05    0.33
Q7    1   0.1377  0.1155  0.9113  11.00000  0.05    0.32
Q8    1   0.3544  0.2274  0.4941  11.00000  0.05    0.32
Q9    1   0.5913  0.5084  0.8043  11.00000  0.05    0.32
Q10   1   0.3998  0.7394  0.7892  11.00000  0.05    0.32
;
_shelx_res_checksum   22271

_shelx_hkl_file
;
   0   0  -1  627.73    4.83
   0   0  -1  614.12    5.35
   0   0  -2 1928.49   11.97
   0   0  -2 1860.02   13.00
   0   0  -3 1941.33   14.74
   0   0  -3 1945.43   16.32
   0   0  -4 2544.41   21.80
   0   0  -4 2508.61   19.28
   0   0  -5 1084.03   16.04
   0   0  -5 1119.58   14.52
   0   0  -6  309.41    9.58
   0   0  -6  294.06    8.36
   0   0  -7  140.97    7.16
   0   0  -7  141.79    6.43
   0   0   8  945.54   18.61
   0   0  -8 1005.63   20.75
   0   0  -8  951.94   17.88
   0   0   9    3.95    1.58
   0   0  -9    0.60    1.77
   0   0  10  244.88   10.88
   0   0  11   26.65    4.16
   0   0  12  115.30    9.07
   0   0  13    9.24    3.28
   0   0  14  116.53    8.70
   0   0  15  271.19   12.19
   0   0  16   16.22    2.95
   0   0  17  754.65   13.49
   0  -1  17  113.98    5.91
   0  -1  16    2.31    1.73
   0  -1  15   -0.79    2.45
   0  -1  14   83.12    7.39
   0  -1  13  399.38   16.73
   0  -1  12  223.81   12.49
   0  -1  11   21.35    3.63
   0  -1  11   18.21    4.18
   0  -1  10   14.16    2.71
   0  -1   9    7.85    2.17
   0   1  -8   62.93    5.45
   0   1  -8   65.20    5.01
   0   1  -7 1011.84   17.52
   0   1  -7 1051.92   19.44
   0   1  -6  934.34   16.61
   0   1  -6  868.09   14.82
   0   1  -5 2988.40   26.69
   0   1  -5 2899.42   24.50
   0   1  -4 5297.90   31.31
   0   1  -4 5465.52   29.98
   0   1  -3  849.98   10.39
   0   1  -3  794.04   10.42
   0   1  -2 2424.52   14.41
   0   1  -2 2478.30   14.87
   0   1  -1 2416.77   11.38
   0   1   0 2251.25    7.40
   0   1   1 1157.33    7.52
   0  -1  -1 1155.60    5.21
   0  -1  -2 4389.24   15.82
   0  -1  -2 4424.96   21.02
   0  -1  -3 1603.58   12.52
   0  -1  -3 1603.28   15.45
   0  -1  -4  903.79   13.43
   0  -1  -4  909.59   11.07
   0  -1  -5  112.61    5.36
   0  -1  -5  110.19    4.44
   0  -1  -6  515.68   10.65
   0  -1  -6  533.20   12.77
   0  -1  -7   50.07    3.82
   0  -1  -7   50.72    4.54
   0   1   8 1050.93   18.91
   0  -1  -8 1054.13   21.45
   0  -1  -9  120.28    8.09
   0  -1 -10  118.89    8.44
   0   1  11  627.50   18.94
   0   1  11  668.07   21.04
   0   1  11  682.78   22.14
   0   1  12  275.07   12.54
   0   1  12  289.97   14.06
   0   1  13  655.56   18.44
   0   1  13  655.91   20.67
   0   1  14   27.07    4.36
   0   1  15  619.10   17.09
   0   1  16    0.78    1.55
   0  -2  17    5.16    1.80
   0  -2  16    3.29    2.24
   0  -2  15   39.33    5.36
   0  -2  14    8.87    3.20
   0  -2  13   56.74    6.71
   0  -2  12  229.64   12.72
   0  -2  12  220.33   11.82
   0  -2  11  117.68    8.43
   0  -2  11  132.15    9.14
   0  -2  10   78.16    6.61
   0  -2   9  433.33   14.33
   0   2  -8  257.73    9.95
   0   2  -7  396.65   11.38
   0   2  -6 4864.31   36.27
   0   2  -5   21.48    2.50
   0   2  -4 1594.12   17.30
   0   2  -3 1708.94   15.90
   0   2  -2 1612.06   13.23
   0   2  -1 3373.23   12.30
   0  -2   1 3289.31   16.22
   0   2   0 1124.61    7.30
   0  -2   0 1129.16    6.43
   0   2   1  118.90    3.24
   0  -2  -1  119.29    3.20
   0   2   1  121.88    3.19
   0  -2  -2 1028.41   11.16
   0  -2  -2 1011.47    6.83
   0  -2  -3 4394.93   19.09
   0  -2  -3 4503.78   27.13
   0  -2  -4 4263.29   30.56
   0  -2  -4 4187.62   22.10
   0  -2  -5  368.48   10.07
   0  -2  -5  384.06    7.80
   0  -2  -6  470.10   12.46
   0  -2  -6  496.79    9.99
   0  -2  -7  128.75    7.24
   0  -2  -8   16.79    3.13
   0   2   9  139.01    9.48
   0  -2  -9  131.70    8.63
   0   2  10   16.27    3.57
   0   2  10   17.39    3.50
   0   2  10   23.30    4.46
   0  -2 -10   15.95    3.48
   0   2  11  622.72   20.21
   0   2  11  636.31   19.67
   0   2  12   15.20    3.58
   0   2  12    9.14    2.83
   0   2  13  570.53   18.59
   0   2  13  565.01   17.32
   0   2  14  555.39   15.29
   0   2  14  526.55   16.43
   0   2  15  211.75    9.09
   0   2  16  256.69    7.61
   0  -3  17   52.11    4.35
   0  -3  16   12.67    3.19
   0  -3  15   42.97    5.29
   0   3 -14  135.89    8.59
   0  -3  14  137.70    9.59
   0  -3  13  288.24   14.07
   0   3 -13  300.03   13.35
   0   3 -12    3.63    2.48
   0  -3  12   11.19    3.18
   0  -3  12    6.71    3.14
   0  -3  11    6.47    2.96
   0  -3  11    8.82    2.65
   0  -3  10    6.07    2.40
   0  -3   9  163.53    9.19
   0  -3   8 2578.15   33.72
   0   3  -8 2596.29   32.41
   0   3  -7 2459.24   29.34
   0   3  -6  936.88   16.90
   0   3  -5 1947.17   22.31
   0   3  -4 1088.27   15.13
   0  -3   2  865.77   11.13
   0  -3   1 4521.33   20.51
   0   3  -1 4528.64   16.84
   0   3   0  388.78    6.91
   0   3   0  388.67    5.24
   0   3   0  399.01    7.24
   0  -3   0  404.80    4.51
   0   3   1   10.26    1.33
   0  -3  -1   11.68    1.28
   0  -3  -2  848.54   11.24
   0   3   2  835.77   11.66
   0   3   2  837.97   10.73
   0   3   3  812.37   13.97
   0  -3  -3  833.97    6.92
   0  -3  -4  333.76    9.07
   0  -3  -4  346.65    5.63
   0   3   4  298.61    9.81
   0   3   4  314.68    5.42
   0  -3  -5   53.15    4.14
   0   3   5   52.88    4.73
   0   3   6   57.29    5.44
   0  -3  -6   41.13    3.96
   0   3   7   10.25    2.60
   0  -3  -7   12.82    2.54
   0  -3  -8  255.25   11.36
   0   3   8  253.28   12.76
   0   3   9  130.40    9.89
   0  -3  -9  144.00    9.34
   0   3   9  136.19    9.25
   0   3  10   49.22    6.35
   0  -3 -10   43.33    5.24
   0   3  10   39.79    5.50
   0   3  10   43.93    5.24
   0   3  11  401.43   15.97
   0   3  11  380.32   15.68
   0   3  12  330.25   14.09
   0   3  12  331.12   14.23
   0   3  13   28.50    4.16
   0   3  13   22.08    3.94
   0   3  14  874.33   19.02
   0   3  14  876.86   18.60
   0   3  15    2.60    1.43
   0  -4  17   38.77    3.69
   0  -4  16   76.57    6.17
   0  -4  15    7.28    2.81
   0   4 -15    6.01    2.56
   0   4 -14   16.39    3.73
   0  -4  14   16.34    3.78
   0  -4  13  616.40   20.08
   0   4 -13  588.82   19.36
   0   4 -12  584.84   19.19
   0  -4  12  561.49   19.77
   0  -4  12  579.76   19.36
   0  -4  11    0.82    1.32
   0   4 -11    3.40    2.20
   0  -4  10  547.64   18.14
   0  -4   9  442.29   15.54
   0  -4   8  149.96    8.60
   0  -4   7 2472.77   32.13
   0   4  -6  163.41    7.51
   0  -4   6  165.18    7.76
   0   4  -5 4460.38   35.65
   0  -4   5 4648.31   37.94
   0  -4   4 1750.35   21.39
   0  -4   3 4119.72   29.37
   0  -4   2  919.03   12.10
   0   4  -1 1431.64   15.57
   0  -4   1 1426.86   12.29
   0   4  -1 1393.59   15.53
   0  -4   0  266.58    3.99
   0  -4   0  273.55    5.90
   0   4   0  251.82    4.88
   0   4   0  263.81    6.93
   0   4   0  265.73    6.67
   0  -4  -1  287.87    6.57
   0   4   1  281.20    6.03
   0   4   1  280.39    6.96
   0   4   1  283.70    7.49
   0  -4  -2  432.47    8.91
   0   4   2  424.16    8.84
   0   4   2  410.19    8.66
   0   4   3  725.59   13.90
   0  -4  -3  747.07   13.11
   0  -4  -4  211.61    7.73
   0   4   4  188.46    8.27
   0   4   5   90.69    6.53
   0  -4  -5   92.61    5.79
   0   4   6  145.64    9.03
   0  -4  -6  161.53    8.20
   0   4   7   41.20    5.21
   0  -4  -7   44.80    4.74
   0  -4  -8  188.43   10.18
   0   4   8  170.83   11.17
   0   4   9 1175.34   30.18
   0   4   9 1160.75   27.46
   0  -4  -9 1234.52   27.47
   0   4  10  665.08   21.05
   0   4  10  679.91   20.45
   0   4  11   11.14    3.49
   0   4  11    1.62    1.68
   0   4  12  175.79   10.32
   0   4  12  172.28    9.79
   0   4  13   55.01    4.96
   0   4  13   52.15    5.28
   0   4  14  266.20    9.64
   0   4  15  400.54    9.95
   0  -5  17   98.14    5.34
   0   5 -16  112.85    6.68
   0  -5  16  117.64    7.10
   0  -5  15  154.18    9.15
   0   5 -15  141.87    8.75
   0   5 -14  111.87    8.29
   0  -5  14  117.80    8.49
   0  -5  13    5.92    3.17
   0   5 -13    2.40    2.75
   0  -5  12  170.09   10.46
   0   5 -12  180.41   11.18
   0  -5  11  104.98    8.16
   0   5 -11  102.56    8.46
   0  -5  11  117.33    9.14
   0  -5  10  804.62   22.58
   0  -5   9 2397.13   37.28
   0  -5   8   66.89    6.21
   0  -5   7  971.72   21.26
   0  -5   6 1061.47   20.63
   0  -5   5 2549.26   29.73
   0  -5   4 3037.60   29.23
   0  -5   3  215.15    7.05
   0  -5   2  289.40    6.99
   0   5  -2  284.74    8.19
   0   5  -1  373.10    6.02
   0  -5   1  395.30    6.76
   0   5  -1  381.99    9.26
   0   5  -1  372.65    9.32
   0  -5   0   12.67    1.60
   0   5   0   12.33    1.85
   0   5   0   10.54    1.15
   0   5   0    8.14    1.67
   0   5   1  359.78    9.66
   0   5   1  365.11    7.22
   0  -5  -1  362.68    8.36
   0   5   1  352.85    8.84
   0   5   2  739.69   13.18
   0  -5  -2  736.76   12.86
   0   5   2  761.83   12.47
   0   5   2  736.26   14.45
   0   5   3  475.25   12.27
   0   5   3  463.16   11.60
   0  -5  -4  228.18    8.65
   0   5   4  224.42    8.90
   0   5   4  212.53    9.05
   0  -5  -5    6.72    1.81
   0   5   5    8.29    2.35
   0  -5  -6  112.41    7.18
   0   5   6   89.58    7.46
   0  -5  -7    9.10    2.51
   0  -5  -8 1549.53   29.58
   0   5   8 1586.25   32.01
   0   5   9    6.62    2.45
   0   5  10 1454.37   31.17
   0   5  11   70.29    6.91
   0   5  12  217.52   10.86
   0   5  13  317.70   11.49
   0   5  13  311.97   12.26
   0   5  14    3.32    1.53
   0   6 -17  260.89    8.00
   0  -6  16    7.68    1.78
   0   6 -16    4.90    1.94
   0   6 -15   12.72    2.68
   0   6 -15    6.96    2.85
   0  -6  15   11.36    2.62
   0  -6  14    4.26    1.91
   0   6 -14    4.13    2.59
   0   6 -14    5.18    2.73
   0  -6  13  434.46   16.01
   0   6 -13  415.88   16.90
   0   6 -12   47.39    6.11
   0   6 -11 1296.46   29.68
   0   6 -11 1227.58   26.42
   0  -6  10   83.08    7.93
   0   6 -10   83.98    7.69
   0   6 -10   84.00    7.39
   0  -6   9 3025.56   43.33
   0  -6   8  572.70   18.08
   0  -6   7  201.15   10.09
   0  -6   6 1107.70   21.92
   0  -6   5   48.17    4.48
   0  -6   4  955.64   17.05
   0  -6   3  275.05    8.17
   0   6  -3  264.82    9.17
   0  -6   2  401.26    8.59
   0   6  -2  380.02   10.56
   0  -6   1  529.22   10.00
   0   6  -1  510.01   12.28
   0  -6   0  111.47    4.82
   0   6   0  106.96    5.56
   0   6   0  109.28    5.88
   0   6   1  104.42    5.98
   0  -6  -1  111.28    5.12
   0   6   1  107.70    5.62
   0  -6  -2  308.88    9.09
   0   6   2  289.37   10.29
   0   6   3   35.50    3.88
   0  -6  -3   39.34    3.69
   0  -6  -4   50.77    4.50
   0   6   4   51.52    4.89
   0  -6  -5  101.99    6.70
   0   6   5   98.94    6.97
   0  -6  -6  173.82    9.31
   0   6   6  174.14    9.32
   0   6   6  167.07   10.17
   0   6   7   97.77    8.27
   0   6   7   92.39    6.98
   0   6   8 1182.26   28.47
   0   6   9  743.42   22.63
   0   6  10  329.99   14.62
   0   6  11  527.68   17.30
   0   6  11  543.49   19.67
   0   6  12   93.84    7.33
   0   6  12   91.95    6.58
   0   6  13  197.68    8.26
   0   6  13  203.38    8.09
   0   7 -17   38.03    3.18
   0   7 -16  137.36    7.48
   0   7 -15  288.20   12.28
   0   7 -14   42.70    5.28
   0   7 -14   45.15    4.90
   0   7 -13  547.28   19.10
   0   7 -13  464.48   17.86
   0   7 -12  411.13   17.26
   0   7 -12  411.90   15.57
   0   7 -12  438.55   17.96
   0   7 -11  866.00   25.68
   0   7 -11  864.02   24.89
   0   7 -11  858.85   22.86
   0   7 -10 2554.58   39.53
   0   7 -10 2492.50   41.58
   0  -7  10 2646.80   43.76
   0   7 -10 2564.60   40.79
   0  -7   9  351.77   15.40
   0  -7   8  800.46   21.93
   0  -7   7   15.22    3.34
   0  -7   6  834.82   19.78
   0   7  -5 1490.96   26.10
   0  -7   5 1593.18   25.06
   0  -7   4   31.08    3.34
   0   7  -4   29.04    3.79
   0   7  -3  132.78    7.22
   0   7  -2  262.34    9.79
   0   7  -1  572.40   14.02
   0   7   0  113.33    6.79
   0   7   0  111.87    6.28
   0   7   1  115.38    6.42
   0   7   1  115.28    7.04
   0   7   2  393.97   13.31
   0   7   3   15.72    3.14
   0   7   4  217.35   10.72
   0   7   5   57.74    5.88
   0   7   5   61.51    7.37
   0   7   5   61.90    5.91
   0   7   5   51.73    5.68
   0   7   6  746.23   27.21
   0   7   6  747.50   20.54
   0   7   6  736.97   22.15
   0   7   7  522.78   18.92
   0   7   7  537.77   17.12
   0   7   8  104.97    8.72
   0   7   8   87.82    9.81
   0   7   9  643.42   24.18
   0   7   9  671.67   20.82
   0   7  10  383.61   16.92
   0   7  10  388.79   14.98
   0   7  11  185.59   10.31
   0   7  11  199.90    9.81
   0   7  12   90.97    5.88
   0   7  12   99.67    5.94
   0   8 -17  299.83    8.18
   0   8 -16   10.71    2.45
   0   8 -15   72.42    6.25
   0   8 -14   21.10    4.19
   0   8 -13  583.09   19.86
   0   8 -13  620.20   19.44
   0   8 -13  584.54   17.61
   0   8 -12  920.33   25.76
   0   8 -12  967.86   24.16
   0   8 -11   44.08    5.67
   0   8 -11   47.80    6.46
   0   8 -11   53.57    6.74
   0  -8  10 1357.27   32.27
   0   8 -10 1267.24   30.41
   0   8 -10 1269.38   29.06
   0   8 -10 1251.68   28.80
   0   8 -10 1248.55   30.24
   0  -8   9  466.26   18.23
   0   8  -9  441.66   16.74
   0   8  -9  398.30   17.59
   0   8  -9  443.15   17.05
   0   8  -9  390.74   16.86
   0   8  -9  433.60   17.64
   0   8  -8  462.18   17.75
   0  -8   8  479.09   17.70
   0   8  -8  420.56   17.56
   0   8  -8  445.24   17.34
   0   8  -7   88.67    8.04
   0  -8   7  100.03    7.70
   0   8  -6   29.44    4.70
   0  -8   6   27.04    4.22
   0   8  -5  174.17    9.81
   0   8  -4  649.34   17.92
   0   8  -3    2.02    2.00
   0   8  -2  410.32   13.34
   0   8  -1   56.45    5.05
   0   8   0  472.85   14.00
   0   8   1  125.01    7.44
   0   8   2  615.58   18.28
   0   8   3  467.34   19.27
   0   8   3  413.07   15.50
   0   8   3  417.48   15.91
   0   8   3  427.09   17.09
   0   8   4  452.53   16.63
   0   8   4  499.25   21.22
   0   8   4  451.30   16.40
   0   8   4  455.67   16.79
   0   8   5  879.43   23.78
   0   8   5  910.95   29.93
   0   8   5  923.17   23.72
   0   8   6  102.45    7.92
   0   8   6   90.04    8.10
   0   8   6   97.60    9.99
   0   8   7  668.86   19.15
   0   8   7  635.29   20.64
   0   8   8   48.62    7.14
   0   8   8   56.72    5.46
   0   8   8   63.96    6.62
   0   8   9    1.93    1.91
   0   8   9    0.50    2.51
   0   8  10  279.24   12.62
   0   8  10  283.15   11.47
   0   8  11    2.36    1.75
   0   8  11    3.52    1.80
   0   9 -16  398.87   11.25
   0   9 -15  105.95    6.99
   0   9 -14  581.76   15.34
   0   9 -14  603.03   18.28
   0   9 -13    2.46    2.08
   0   9 -13    2.90    2.48
   0   9 -12  441.66   16.50
   0   9 -12  440.66   17.64
   0   9 -12  459.85   17.04
   0   9 -11  356.46   15.80
   0   9 -11  335.66   15.19
   0   9 -11  323.24   15.59
   0   9 -10    6.45    2.56
   0   9 -10    5.91    2.47
   0   9 -10    1.99    2.84
   0   9 -10    0.13    2.64
   0   9  -9  290.90   14.78
   0   9  -9  297.00   14.61
   0   9  -9  284.26   13.61
   0   9  -9  279.52   14.29
   0   9  -8  145.28   10.49
   0   9  -8  134.28    9.90
   0   9  -8  132.72   10.60
   0   9  -7 1024.42   25.98
   0   9  -7  950.59   26.98
   0   9  -6  240.05   12.31
   0   9  -6  227.75   12.78
   0   9  -5   99.54    8.16
   0   9  -5  107.71    7.97
   0   9  -4   64.32    6.38
   0   9  -3  144.38    8.90
   0   9  -2   29.61    4.17
   0   9  -1   61.72    5.81
   0   9   0   10.67    2.52
   0   9   0    5.91    2.18
   0   9   0    6.71    2.49
   0   9   1  379.57   15.39
   0   9   1  424.99   17.50
   0   9   1  423.70   16.46
   0   9   2   11.81    3.60
   0   9   2    6.75    3.10
   0   9   2    8.89    2.87
   0   9   3 1160.02   27.64
   0   9   3 1143.34   31.75
   0   9   4   44.46    6.00
   0   9   4   32.45    4.72
   0   9   4   28.94    5.78
   0   9   5  986.19   25.09
   0   9   5  989.21   24.96
   0   9   6   95.22    7.76
   0   9   6   89.21    7.67
   0   9   6   79.92    9.33
   0   9   7   72.00    6.85
   0   9   7   62.77    7.70
   0   9   7   79.03    6.49
   0   9   8  117.60    9.45
   0   9   8  132.31    7.32
   0   9   8  124.57    8.21
   0   9   9  144.72    9.04
   0   9   9  146.86    8.03
   0   9  10  210.81    8.71
   0  10 -16  393.23    9.85
   0  10 -15   72.92    5.44
   0  10 -14  729.28   16.27
   0  10 -14  747.63   19.01
   0  10 -13  358.92   14.51
   0  10 -13  354.45   13.10
   0  10 -12    1.57    2.28
   0  10 -12    0.40    2.28
   0  10 -11  173.81   11.31
   0  10 -11  177.94   11.00
   0  10 -10    2.97    1.80
   0  10 -10    9.06    3.38
   0  10  -9  250.38   14.11
   0  10  -9  273.30   14.55
   0  10  -8  661.71   22.72
   0  10  -8  660.50   22.34
   0  10  -8  643.09   21.84
   0  10  -7   45.67    5.63
   0  10  -6  591.86   19.97
   0  10  -6  564.57   20.84
   0  10  -5   22.91    4.08
   0  10  -5   16.81    4.47
   0  10  -4    3.10    2.03
   0  10  -4    1.76    2.32
   0  10  -3   11.47    2.97
   0  10  -3   14.69    3.19
   0  10  -3    9.46    3.18
   0  10  -2  202.35   10.95
   0  10  -2  205.15   11.69
   0  10  -2  195.85   10.74
   0  10  -2  201.22   11.18
   0  10  -1    9.34    3.17
   0  10  -1   13.15    3.73
   0  10  -1   10.80    2.93
   0  10  -1   13.69    3.45
   0  10   0  181.20   11.07
   0  10   0  175.86   10.11
   0  10   0  185.41   11.42
   0  10   0  181.53   11.60
   0  10   1  758.08   23.23
   0  10   1  738.16   24.31
   0  10   1  705.67   21.91
   0  10   2  389.78   16.50
   0  10   2  422.82   18.03
   0  10   2  414.30   18.85
   0  10   3   13.71    3.70
   0  10   3    5.67    3.35
   0  10   4  203.15   11.66
   0  10   4  197.33   13.61
   0  10   5  413.86   15.18
   0  10   5  420.67   15.91
   0  10   6 1041.64   23.22
   0  10   6  985.44   22.80
   0  10   7   50.77    4.93
   0  10   7   47.66    5.96
   0  10   7   50.73    4.85
   0  10   8   81.02    6.42
   0  10   9  187.62    7.67
   0  11 -15  274.79    8.63
   0  11 -14   49.34    4.06
   0  11 -14   46.66    4.49
   0  11 -13  435.23   14.67
   0  11 -13  413.36   13.25
   0  11 -12  100.54    7.83
   0  11 -12   99.25    7.51
   0  11 -11   -1.99    2.50
   0  11 -11   -1.35    2.51
   0  11 -10  294.59   14.24
   0  11 -10  301.38   14.71
   0  11  -9   46.28    6.27
   0  11  -9   38.54    5.33
   0  11  -8  136.29   10.70
   0  11  -8  149.03   10.79
   0  11  -7  222.83   12.88
   0  11  -7  237.58   14.19
   0  11  -6    3.44    2.05
   0  11  -6   -4.93    4.10
   0  11  -5   77.22    7.60
   0  11  -4   86.59    7.90
   0  11  -3  102.42    8.56
   0  11  -3   96.60    7.42
   0  11  -3   88.92    7.87
   0  11  -2   24.46    4.26
   0  11  -2   29.37    4.58
   0  11  -2   28.33    4.82
   0  11  -1  440.01   18.33
   0  11  -1  442.10   17.55
   0  11  -1  438.92   17.13
   0  11   0   81.65    8.31
   0  11   0   85.48    7.98
   0  11   0   83.99    8.03
   0  11   1  256.74   14.72
   0  11   1  259.60   13.40
   0  11   1  267.94   14.12
   0  11   2  181.91   11.24
   0  11   2  157.52   11.78
   0  11   3   61.57    6.55
   0  11   3   41.92    6.55
   0  11   4  397.59   17.95
   0  11   4  494.06   17.12
   0  11   5  335.17   13.18
   0  11   5  258.62   13.67
   0  11   6    6.75    2.63
   0  11   6    5.57    2.15
   0  11   7  196.01    9.13
   0  11   8    0.49    1.01
   0  12 -14  161.41    6.24
   0  12 -14  170.79    6.15
   0  12 -13    8.34    2.31
   0  12 -13    4.71    1.85
   0  12 -12  123.75    7.34
   0  12 -12  130.81    7.83
   0  12 -11   79.02    6.94
   0  12 -11   84.68    6.66
   0  12 -10  101.39    8.41
   0  12  -9  327.14   15.55
   0  12  -8   20.55    4.59
   0  12  -7  183.25   11.53
   0  12  -7  173.37   12.19
   0  12  -6   12.20    3.20
   0  12  -6    5.02    2.86
   0  12  -6   11.52    3.07
   0  12  -5   16.39    3.29
   0  12  -5   19.41    4.07
   0  12  -5   11.97    3.52
   0  12  -4    6.13    3.24
   0  12  -4   10.12    3.32
   0  12  -4    7.87    2.83
   0  12  -4    6.62    2.13
   0  12  -3   47.29    5.88
   0  12  -3   58.44    5.79
   0  12  -3   52.69    6.62
   0  12  -2  157.31   10.56
   0  12  -2  160.07   10.94
   0  12  -2  160.93   10.14
   0  12  -1  137.98    9.70
   0  12  -1  136.76    9.93
   0  12  -1  138.10   10.42
   0  12   0 1224.86   30.55
   0  12   0 1198.79   28.24
   0  12   1    1.97    1.97
   0  12   1   -1.60    2.34
   0  12   2   82.38    7.51
   0  12   2   69.92    7.68
   0  12   3    2.06    2.48
   0  12   3    3.47    2.73
   0  12   4   87.20    6.74
   0  12   4   65.81    6.46
   0  12   5  741.17   18.58
   0  12   6  463.15   11.98
   0  13 -13   45.89    3.42
   0  13 -12    0.01    1.60
   0  13 -11  117.03    7.37
   0  13 -10   19.18    3.92
   0  13  -9  202.28   11.42
   0  13  -8  192.93    9.69
   0  13  -8  211.49   12.31
   0  13  -7    8.12    2.21
   0  13  -7   -0.96    2.26
   0  13  -6   37.07    4.91
   0  13  -6   39.12    5.52
   0  13  -6   32.28    5.33
   0  13  -5   28.36    4.84
   0  13  -5   26.33    4.56
   0  13  -5   19.74    4.57
   0  13  -4  108.39    8.58
   0  13  -4   90.07    8.09
   0  13  -3  133.02    9.86
   0  13  -3  133.11    9.32
   0  13  -2  654.70   21.38
   0  13  -2  628.87   19.90
   0  13  -1  103.98    8.83
   0  13  -1  103.32    7.94
   0  13   0  199.48   10.81
   0  13   0  203.53   11.90
   0  13   1  119.52    8.99
   0  13   2  178.29   10.15
   0  13   3  109.64    7.18
   0  13   4  301.62    9.91
   0  14 -11  123.93    6.12
   0  14 -10    5.04    2.25
   0  14  -9    6.45    2.41
   0  14  -8   14.24    3.22
   0  14  -7   22.30    3.68
   0  14  -6   78.25    6.26
   0  14  -6   84.50    6.21
   0  14  -5  108.29    8.42
   0  14  -5  107.01    7.21
   0  14  -4  244.19   12.21
   0  14  -3  107.18    8.26
   0  14  -2  129.43    8.85
   0  14  -1   93.74    7.17
   0  14   0    2.37    2.00
   0  14   1  152.95    7.90
  -1  14   2  297.51    9.91
  -1  14   1    3.35    2.22
  -1  14   0  193.23   10.04
  -1  14  -1   16.93    3.80
  -1  14  -2 1039.66   24.68
  -1  14  -3  278.45   13.08
  -1  14  -3  294.43   13.16
  -1  14  -4   13.11    3.49
  -1  14  -4   13.94    3.72
  -1  14  -5   59.94    6.12
  -1  14  -5   64.20    6.87
  -1  14  -6   20.52    3.41
  -1  14  -6   15.11    3.19
  -1  14  -7  312.60   12.74
  -1  14  -7  320.82   12.24
  -1  14  -8   86.97    6.00
  -1  14  -8   94.39    7.14
  -1  14  -9    9.06    2.96
  -1  14  -9    9.30    2.07
  -1  14 -10    0.33    1.60
  -1  14 -11   29.26    3.16
  -1  13   4   98.29    6.24
  -1  13   3   38.58    4.69
  -1  13   3   28.77    4.25
  -1  13   2  466.57   16.62
  -1  13   2  588.87   17.88
  -1  13   1  136.71    9.48
  -1  13   1  144.48    9.35
  -1  13   0  723.32   22.20
  -1  13   0  748.06   21.13
  -1  13  -1  505.13   18.82
  -1  13  -1  505.49   18.30
  -1  13  -1  519.60   17.42
  -1  13  -2   70.67    7.40
  -1  13  -2   91.11    8.42
  -1  13  -2   91.92    7.23
  -1  13  -3  392.79   13.87
  -1  13  -3  373.38   15.79
  -1  13  -3  395.56   16.63
  -1  13  -4    1.03    2.50
  -1  13  -4    0.25    2.12
  -1  13  -5   26.68    4.66
  -1  13  -5   34.81    5.36
  -1  13  -5   33.59    5.14
  -1  13  -6   75.94    7.26
  -1  13  -6   85.43    8.03
  -1  13  -6   81.87    8.02
  -1  13  -7   61.70    6.29
  -1  13  -7   65.13    7.10
  -1  13  -8  372.07   15.91
  -1  13  -9  128.85    9.10
  -1  13 -10    1.68    2.52
  -1  13 -11   12.87    2.84
  -1  13 -12    5.20    1.81
  -1  13 -13    4.40    1.34
  -1  12   6   55.55    4.62
  -1  12   6   56.74    4.55
  -1  12   5   27.66    3.95
  -1  12   5   24.18    4.08
  -1  12   4  459.72   17.13
  -1  12   4  591.45   17.68
  -1  12   3  466.67   18.18
  -1  12   3  554.52   18.37
  -1  12   2   16.11    3.99
  -1  12   2   14.09    3.46
  -1  12   1  675.89   21.85
  -1  12   1  641.63   22.05
  -1  12   1  643.55   20.81
  -1  12   0  144.32   10.54
  -1  12   0  146.44   10.39
  -1  12   0  147.05   10.10
  -1  12  -1 1344.31   29.30
  -1  12  -1 1289.24   30.09
  -1  12  -1 1339.41   31.31
  -1  12  -2   48.31    6.46
  -1  12  -2   55.00    6.72
  -1  12  -2   56.98    6.06
  -1  12  -3   37.38    5.65
  -1  12  -3   32.71    5.39
  -1  12  -3   24.03    4.13
  -1  12  -4   73.50    7.57
  -1  12  -4   67.00    7.04
  -1  12  -4   66.72    7.05
  -1  12  -5    4.39    3.22
  -1  12  -5    5.78    3.10
  -1  12  -6  184.30   12.27
  -1  12  -6  195.46   11.94
  -1  12  -7  433.46   18.52
  -1  12  -7  408.83   17.21
  -1  12  -8   31.26    5.53
  -1  12  -9    9.47    3.55
  -1  12 -10   56.32    6.33
  -1  12 -11    8.73    2.91
  -1  12 -11    7.45    2.28
  -1  12 -12   -1.13    2.02
  -1  12 -12    3.09    1.38
  -1  12 -13  247.78    8.90
  -1  12 -13  247.19    8.95
  -1  12 -14   32.68    2.63
  -1  11   8  169.99    7.27
  -1  11   7   59.97    4.82
  -1  11   7   52.10    5.14
  -1  11   6  689.48   20.89
  -1  11   6  831.87   19.73
  -1  11   5  384.23   16.89
  -1  11   5  493.44   16.65
  -1  11   4  106.41    8.42
  -1  11   4   92.10    9.08
  -1  11   3  450.77   19.35
  -1  11   3  479.89   18.05
  -1  11   2    5.14    2.47
  -1  11   2    6.71    2.98
  -1  11   2    5.05    3.28
  -1  11   1 1237.92   29.79
  -1  11   1 1206.83   30.60
  -1  11   1 1192.27   28.80
  -1  11   0  325.94   14.94
  -1  11   0  326.75   15.22
  -1  11   0  341.92   16.05
  -1  11  -1  209.39   11.73
  -1  11  -1  213.29   12.44
  -1  11  -1  207.12   12.03
  -1  11  -2  498.29   17.18
  -1  11  -2  456.51   17.45
  -1  11  -2  474.91   18.23
  -1  11  -3   65.65    6.84
  -1  11  -3   71.16    6.55
  -1  11  -3   65.55    7.26
  -1  11  -4   46.15    5.92
  -1  11  -4   37.15    5.08
  -1  11  -5  153.21   11.43
  -1  11  -5  173.52   11.04
  -1  11  -6  173.53   11.26
  -1  11  -6  166.16   12.05
  -1  11  -7   41.14    5.99
  -1  11  -7   38.74    6.03
  -1  11  -8   46.41    6.27
  -1  11  -9   12.96    3.68
  -1  11  -9    9.78    3.14
  -1  11 -10   20.89    4.63
  -1  11 -10   20.75    4.09
  -1  11 -11   20.23    4.14
  -1  11 -11   27.89    4.59
  -1  11 -12  153.73    9.02
  -1  11 -12  151.49    9.38
  -1  11 -13  101.84    7.22
  -1  11 -13  105.72    6.64
  -1  11 -14  565.76   14.14
  -1  11 -14  519.60   11.88
  -1  11 -15   15.02    2.15
  -1  10   9   43.88    3.98
  -1  10   9   39.10    4.00
  -1  10   8    6.68    1.97
  -1  10   8   11.13    2.86
  -1  10   8    7.72    3.10
  -1  10   7  362.19   13.72
  -1  10   7  374.58   13.34
  -1  10   7  329.73   15.49
  -1  10   6  138.80    8.81
  -1  10   6  126.41    8.66
  -1  10   5 1612.45   31.87
  -1  10   5 1395.82   35.30
  -1  10   4   14.13    4.22
  -1  10   4   18.08    3.87
  -1  10   3  369.56   16.79
  -1  10   3  342.49   15.54
  -1  10   3  348.56   17.21
  -1  10   2  333.93   15.59
  -1  10   2  326.02   16.17
  -1  10   2  327.31   15.13
  -1  10   1  381.94   16.10
  -1  10   1  402.86   16.49
  -1  10   1  377.72   16.76
  -1  10   0  681.17   20.00
  -1  10   0  629.52   20.08
  -1  10   0  642.73   20.29
  -1  10   0  662.16   21.28
  -1  10  -1  492.10   18.02
  -1  10  -1  508.23   17.18
  -1  10  -1  478.84   17.17
  -1  10  -1  502.88   17.48
  -1  10  -2    2.27    2.38
  -1  10  -2    0.81    0.96
  -1  10  -2   -0.65    2.14
  -1  10  -3   48.17    5.99
  -1  10  -3   39.72    4.74
  -1  10  -3   43.84    5.36
  -1  10  -4  213.12   12.14
  -1  10  -4  207.67   11.51
  -1  10  -5  104.60    8.26
  -1  10  -5  100.09    8.84
  -1  10  -5  106.25    9.15
  -1  10  -6  210.39   11.96
  -1  10  -6  215.58   12.99
  -1  10  -6  217.88   12.95
  -1  10  -7   25.83    4.63
  -1  10  -7   22.77    4.31
  -1  10  -8   41.44    5.84
  -1  10  -8   39.51    6.07
  -1  10  -9    6.20    3.15
  -1  10  -9    5.40    3.60
  -1  10 -10   60.62    6.88
  -1  10 -10   51.67    6.50
  -1  10 -11   27.74    4.79
  -1  10 -11   27.52    4.58
  -1  10 -12  252.55   11.93
  -1  10 -12  271.74   13.22
  -1  10 -13  199.80    9.65
  -1  10 -13  211.82   10.91
  -1  10 -14  525.57   13.20
  -1  10 -14  546.71   15.65
  -1  10 -15  399.66   11.48
  -1   9  11    9.02    1.76
  -1   9  11    3.56    1.15
  -1   9  10   21.22    3.11
  -1   9  10   16.96    3.22
  -1   9   9  203.15    8.32
  -1   9   9  183.19    9.68
  -1   9   9  183.83   10.77
  -1   9   8   26.10    3.88
  -1   9   8   30.95    4.58
  -1   9   8   31.49    5.37
  -1   9   7 1072.07   24.21
  -1   9   7 1083.40   26.02
  -1   9   6  443.11   17.04
  -1   9   6  458.10   16.82
  -1   9   5  747.04   22.02
  -1   9   5  710.00   21.28
  -1   9   4 1100.45   31.28
  -1   9   4 1169.19   27.76
  -1   9   3   84.88    7.62
  -1   9   3   93.93    8.68
  -1   9   3   86.87    8.04
  -1   9   3   82.22    7.80
  -1   9   2  732.24   21.95
  -1   9   2  718.14   22.85
  -1   9   2  711.31   21.41
  -1   9   2  697.94   21.22
  -1   9   1   85.88    7.35
  -1   9   1   85.76    6.88
  -1   9   1   85.99    7.63
  -1   9   1   80.54    7.09
  -1   9   0   26.94    4.09
  -1   9  -1  338.71   13.18
  -1   9  -2   49.60    5.28
  -1   9  -3  578.97   17.72
  -1   9  -4  392.51   15.04
  -1   9  -5    2.10    1.97
  -1   9  -6   46.37    5.38
  -1   9  -6   46.61    5.95
  -1   9  -7    5.56    2.84
  -1   9  -7   13.89    3.50
  -1   9  -7    9.31    2.80
  -1   9  -7    2.18    2.10
  -1   9  -7    7.96    2.50
  -1   9  -8  214.88   12.97
  -1   9  -8  221.33   13.20
  -1   9  -8  217.33   12.71
  -1   9  -8  226.30   12.60
  -1   9  -9    4.63    3.02
  -1   9  -9    1.74    2.68
  -1   9  -9    3.14    2.46
  -1   9 -10  883.86   25.61
  -1   9 -10  854.49   24.48
  -1   9 -10  832.05   26.41
  -1   9 -11   42.99    6.03
  -1   9 -11   45.12    6.31
  -1   9 -11   45.28    6.15
  -1   9 -12  238.37   13.35
  -1   9 -12  242.34   12.93
  -1   9 -12  241.21   12.06
  -1   9 -13  518.85   15.89
  -1   9 -13  536.66   17.74
  -1   9 -13  499.38   17.51
  -1   9 -14   13.26    2.59
  -1   9 -14    9.62    3.01
  -1   9 -14   11.68    2.37
  -1   9 -15  354.00   11.86
  -1   9 -16    6.41    1.73
  -1   8  12   82.47    4.96
  -1   8  12   75.28    4.47
  -1   8  11  268.08   11.02
  -1   8  11  275.99   10.74
  -1   8  10    0.89    2.38
  -1   8  10    2.45    1.93
  -1   8   9  527.87   20.83
  -1   8   9  552.06   18.21
  -1   8   8  611.87   17.66
  -1   8   8  607.66   20.07
  -1   8   7  690.91   19.97
  -1   8   7  666.97   21.17
  -1   8   6 1707.93   33.68
  -1   8   6 1778.79   32.73
  -1   8   5  157.41   10.12
  -1   8   5  139.84    9.99
  -1   8   5  164.11   12.34
  -1   8   5  152.99   10.00
  -1   8   4  487.56   17.35
  -1   8   4  491.95   20.13
  -1   8   4  475.21   17.46
  -1   8   4  490.61   18.33
  -1   8   3   21.52    3.86
  -1   8   2 1036.52   24.01
  -1   8   1  328.15   12.00
  -1   8   1  322.74   13.07
  -1   8   0  325.38   11.78
  -1   8   0  316.40   12.40
  -1   8  -1   53.66    5.05
  -1   8  -2  361.95   12.52
  -1   8  -3  116.36    7.36
  -1   8  -4  372.20   13.52
   1  -8   5  381.35   13.11
  -1   8  -5  355.82   13.79
  -1   8  -6  232.27   11.68
   1  -8   6  247.88   11.61
   1  -8   7  138.54    9.29
  -1   8  -7  141.83    9.63
  -1   8  -8  303.56   14.20
   1  -8   8  316.47   14.86
  -1   8  -8  288.14   14.85
  -1   8  -8  288.40   13.99
  -1   8  -8  275.38   13.61
   1  -8   9  405.50   17.49
  -1   8  -9  350.94   17.11
  -1   8  -9  390.41   16.27
  -1   8  -9  345.15   15.61
  -1   8  -9  399.18   16.78
  -1   8 -10  841.53   23.72
  -1   8 -10  808.02   26.23
  -1   8 -10  790.76   24.10
  -1   8 -11  380.62   18.09
  -1   8 -11  393.76   16.10
  -1   8 -11  351.98   16.21
  -1   8 -12   19.09    4.68
  -1   8 -12    9.62    3.63
  -1   8 -13  209.36   10.29
  -1   8 -13  213.89   11.89
  -1   8 -13  233.75   12.63
  -1   8 -14  152.89    8.99
  -1   8 -14  137.39    8.89
  -1   8 -15   32.78    3.59
  -1   8 -15   31.05    4.10
  -1   8 -16  485.15   12.32
  -1   7  13  351.89    9.98
  -1   7  13  327.13    9.05
  -1   7  12  285.25   11.31
  -1   7  12  284.55   10.87
  -1   7  11  316.35   14.20
  -1   7  11  311.72   12.88
  -1   7  10  396.19   15.60
  -1   7  10  377.35   17.50
  -1   7   9  220.78   14.54
  -1   7   9  235.04   12.60
  -1   7   8 1836.41   30.87
  -1   7   8 1818.64   35.24
  -1   7   7  132.97   11.62
  -1   7   7  152.92    9.30
  -1   7   7  151.15   10.09
  -1   7   6  148.00    9.82
  -1   7   6  129.56    8.73
  -1   7   6  142.15    9.70
  -1   7   6  124.21   10.90
  -1   7   5  277.61   12.94
  -1   7   4  633.03   18.48
  -1   7   3 1558.86   27.85
  -1   7   2   72.94    5.41
  -1   7   2   70.85    5.81
  -1   7   1   35.87    3.78
  -1   7   1   34.20    4.11
  -1   7   0  110.46    6.59
  -1   7   0  108.33    6.17
  -1   7  -1  133.26    7.07
  -1   7  -1  130.41    6.89
  -1   7  -2   12.63    2.49
  -1   7  -3  270.58   10.13
   1  -7   3  287.37    8.94
   1  -7   4   88.51    5.70
  -1   7  -4   64.04    5.31
  -1   7  -5    1.69    1.99
   1  -7   5   -0.24    1.39
   1  -7   6   34.66    4.49
  -1   7  -6   25.98    3.90
   1  -7   7  399.02   15.22
  -1   7  -7  351.71   13.87
   1  -7   8   31.59    4.83
  -1   7  -8   21.69    4.09
  -1   7  -9 1589.63   31.50
   1  -7   9 1986.92   37.26
  -1   7  -9 1700.88   37.26
  -1   7  -9 1859.61   34.99
  -1   7  -9 1855.04   33.73
  -1   7 -10   74.57    7.45
  -1   7 -10   58.00    6.15
   1  -7  10   74.18    7.75
  -1   7 -11  437.90   17.84
  -1   7 -11  438.18   16.46
  -1   7 -12  401.72   16.91
  -1   7 -12  398.26   15.10
  -1   7 -12  441.91   19.15
  -1   7 -13   24.73    4.70
  -1   7 -13   29.50    4.86
  -1   7 -14  338.61   14.11
  -1   7 -14  322.76   13.75
  -1   7 -15  104.68    7.13
  -1   7 -15  104.68    6.80
  -1   7 -16   97.03    5.83
  -1   6  14   71.61    4.35
  -1   6  14   63.28    3.86
  -1   6  13    4.31    1.89
  -1   6  13    4.35    2.00
  -1   6  12  969.57   22.19
  -1   6  12  997.42   24.41
  -1   6  11    2.67    2.47
  -1   6  10 1874.03   35.11
  -1   6   9   49.44    6.26
  -1   6   8  840.84   23.89
  -1   6   7  271.97   12.05
  -1   6   7  270.84   13.16
  -1   6   7  273.33   12.57
  -1   6   5  446.34   15.35
  -1   6   4  819.80   18.34
  -1   6   4  759.56   18.56
  -1   6   3   62.12    4.50
  -1   6   3   64.47    5.25
  -1   6   2 1390.57   20.54
  -1   6   2 1333.16   21.94
  -1   6   2 1388.73   18.53
  -1   6   1  317.32    9.56
  -1   6   1  308.77   10.14
  -1   6   1  309.02    7.97
  -1   6   0  176.28    7.09
  -1   6   0  179.56    5.64
  -1   6   0  174.66    7.33
  -1   6  -1   69.31    4.54
  -1   6  -1   67.31    3.41
  -1   6  -1   70.60    4.63
  -1   6  -2   91.69    5.27
   1  -6   2   94.58    4.44
   1  -6   3   59.07    4.14
  -1   6  -3   50.94    4.12
  -1   6  -4  843.68   16.89
   1  -6   4  876.84   17.47
   1  -6   5 1189.55   22.06
   1  -6   6  349.75   12.88
   1  -6   7 1398.56   27.28
   1  -6   8  400.68   15.60
   1  -6   9 1969.43   36.10
  -1   6 -10  788.94   22.91
  -1   6 -10  765.66   21.16
   1  -6  11   94.84    8.72
  -1   6 -11   99.08    8.54
  -1   6 -11   80.35    7.06
  -1   6 -12  564.43   19.85
  -1   6 -13   75.78    7.30
   1  -6  13   70.35    6.81
  -1   6 -14   50.00    5.84
   1  -6  14   59.23    5.88
  -1   6 -15  490.03   15.14
  -1   6 -15  479.28   15.21
   1  -6  15  504.53   14.72
   1  -6  16  108.78    5.71
  -1   6 -16   98.54    5.51
  -1   6 -16  113.44    6.33
  -1   5  14  459.09   12.97
  -1   5  14  490.15   12.94
  -1   5  13  158.87    8.80
  -1   5  12  437.29   15.97
  -1   5  11  452.96   17.28
  -1   5  10 1549.94   32.38
  -1   5   9  996.53   25.86
  -1   5   9  928.62   27.74
  -1   5   8   -0.87    1.70
  -1   5   8    5.89    2.45
   1  -5  -8    4.18    1.71
  -1   5   7    5.51    2.80
   1  -5  -7    8.18    2.43
   1  -5  -6  310.14   11.03
  -1   5   6  268.41   12.52
   1  -5  -5  173.55    7.53
  -1   5   5  164.33    8.98
   1  -5  -4 1422.42   19.54
  -1   5   4 1331.72   22.29
   1  -5  -3 1284.42   16.82
  -1   5   3 1268.23   19.13
  -1   5   2  673.28   12.08
  -1   5   2  648.37   12.52
   1  -5  -2  676.23   10.66
  -1   5   1    3.96    1.74
   1  -5  -1    7.80    1.15
  -1   5   1    5.40    1.48
  -1   5   1    7.26    1.32
  -1   5   0  457.26   10.40
   1  -5   0  474.88    7.02
   1  -5   0  463.07    5.45
  -1   5   0  446.95    8.23
  -1   5   0  460.88   10.11
  -1   5  -1   21.14    1.84
   1  -5   1   23.03    1.84
  -1   5  -1   16.64    2.18
  -1   5  -1   22.07    2.45
  -1   5  -2  118.50    5.27
  -1   5  -2  126.72    4.49
  -1   5  -3 1344.12   17.86
  -1   5  -3 1404.02   18.65
  -1   5  -4   54.80    4.10
  -1   5  -5 1766.09   24.34
  -1   5  -6  437.92   13.11
  -1   5  -7  735.95   18.12
  -1   5  -8  440.41   14.98
   1  -5   9    1.60    2.17
  -1   5 -10  417.89   16.24
   1  -5  10  437.41   17.26
   1  -5  11  601.33   19.27
  -1   5 -11  608.07   20.27
   1  -5  11  631.67   21.31
  -1   5 -12   94.55    8.54
   1  -5  12   99.03    8.23
   1  -5  13  510.50   17.86
  -1   5 -13  487.08   17.76
   1  -5  14    9.74    3.12
  -1   5 -14   10.32    2.37
  -1   5 -15  212.67   10.01
   1  -5  15  201.90   10.02
   1  -5  16  559.34   14.13
  -1   5 -16  542.82   13.28
   1  -5  17    1.97    1.07
  -1   4  15   42.46    3.74
  -1   4  15   44.12    3.60
  -1   4  14  251.84    9.42
  -1   4  14  274.09   10.68
  -1   4  13  200.07   10.39
  -1   4  13  188.95    9.46
  -1   4  12  254.09   11.91
  -1   4  12  236.47   12.22
  -1   4  11 1786.26   32.67
  -1   4  11 1784.04   34.04
  -1   4  10  143.84   10.94
  -1   4  10  154.15   10.19
  -1   4   9  596.05   19.29
   1  -4  -9  633.36   18.68
  -1   4   8  447.69   17.84
   1  -4  -8  496.77   15.53
  -1   4   7   79.29    7.14
   1  -4  -7   95.14    6.39
  -1   4   6  477.31   15.93
   1  -4  -6  574.16   14.10
   1  -4  -5  745.92   14.61
  -1   4   5  669.17   16.95
  -1   4   4   25.59    3.02
   1  -4  -4   20.96    2.25
   1  -4  -3  964.21   13.38
  -1   4   3  937.91   15.38
  -1   4   2    5.48    1.34
   1  -4  -2    3.87    0.99
  -1   4   1    8.89    1.30
   1  -4  -1    6.83    0.86
   1  -4   0  195.42    3.81
  -1   4   0  185.91    4.87
   1  -4   0  186.78    3.69
  -1   4   0  175.41    5.63
  -1   4   0  199.29    5.83
  -1   4  -1  670.58    9.10
  -1   4  -1  665.38    9.01
  -1   4  -1  699.70   10.94
  -1   4  -1  696.11   10.79
  -1   4  -2    0.63    1.00
  -1   4  -2    3.13    0.90
  -1   4  -2    3.44    1.06
  -1   4  -2    0.34    0.82
  -1   4  -3 1283.60   16.44
  -1   4  -4  851.44   14.77
  -1   4  -5    6.14    2.00
  -1   4  -6  491.96   13.21
  -1   4  -7   12.14    2.56
  -1   4  -8 1118.74   22.72
  -1   4  -9 2198.41   33.96
   1  -4  10  188.12   11.04
   1  -4  11 1181.70   28.52
  -1   4 -11 1146.41   26.91
   1  -4  11 1125.12   26.61
   1  -4  12  539.19   18.86
  -1   4 -12  504.30   18.15
   1  -4  13  547.70   18.93
  -1   4 -13  518.89   18.03
  -1   4 -14  290.67   12.70
   1  -4  14  289.41   13.33
   1  -4  15    9.60    2.58
  -1   4 -15    5.52    2.23
   1  -4  16   37.12    4.06
   1  -4  17   42.01    3.40
  -1   3  16  354.58    9.20
  -1   3  15  527.29   13.30
  -1   3  15  534.70   13.10
  -1   3  14  183.57    9.21
  -1   3  14  182.52    9.35
  -1   3  13  515.44   16.99
  -1   3  13  516.21   17.03
  -1   3  12   59.02    6.39
  -1   3  12   59.23    6.37
  -1   3  11  187.67   11.00
  -1   3  11  192.38   11.24
  -1   3  10  407.63   15.63
  -1   3  10  418.85   16.07
  -1   3  10  411.48   17.70
   1  -3  -9  160.41    9.24
  -1   3   9  141.59   10.14
  -1   3   8 1860.92   33.88
   1  -3  -8 1931.06   29.70
   1  -3  -7  598.85   15.09
  -1   3   7  539.36   17.06
   1  -3  -6  958.39   17.40
  -1   3   6  823.60   19.34
   1  -3  -5   14.61    2.19
  -1   3   5   11.37    2.51
   1  -3  -4  731.97   12.27
  -1   3   4  738.18   14.66
   1  -3  -3  257.56    6.41
  -1   3   3  244.54    7.38
  -1   3   2    5.70    1.24
  -1   3   2    7.40    1.30
   1  -3  -2    7.06    1.05
  -1   3   1   26.14    1.88
   1  -3  -1   29.21    1.47
  -1   3   0 1054.33    8.22
   1  -3   0 1046.83    6.75
  -1   3  -1 2506.47   17.56
  -1   3  -1 2508.07   17.14
  -1   3  -2  914.51   11.74
  -1   3  -3   52.33    3.34
  -1   3  -4 3716.05   29.17
  -1   3  -5   75.72    4.71
  -1   3  -6 2054.33   25.72
  -1   3  -7  399.57   12.29
  -1   3  -8  281.20   11.08
  -1   3  -9 1514.99   27.30
   1  -3  10  835.27   22.51
   1  -3  11  166.11   10.42
   1  -3  11  159.75   10.44
  -1   3 -11  153.44    9.78
   1  -3  12  958.51   25.52
  -1   3 -12  978.43   24.39
  -1   3 -13   81.60    6.95
   1  -3  13   68.96    7.35
  -1   3 -14  948.42   21.62
   1  -3  14  983.83   24.90
   1  -3  15  117.08    8.13
   1  -3  16    0.56    1.52
   1  -3  17    5.42    1.50
  -1   2  16   61.76    4.48
  -1   2  15  623.04   14.70
  -1   2  15  618.34   16.53
  -1   2  14  181.84    9.43
  -1   2  14  193.44   10.39
  -1   2  13  755.12   20.47
  -1   2  13  713.82   21.12
  -1   2  12  633.60   19.50
  -1   2  12  628.65   20.20
  -1   2  11  153.45   11.10
  -1   2  11  160.68   10.12
  -1   2  11  149.92    9.55
  -1   2  10    8.73    3.02
   1  -2  -9 1200.01   24.34
  -1   2   9 1216.91   27.61
   1  -2  -8   30.23    3.86
  -1   2   8   29.82    4.22
  -1   2   7  525.58   15.74
   1  -2  -7  557.58   14.13
  -1   2   7  534.29   11.28
   1  -2  -6  116.49    5.98
  -1   2   6  113.04    4.75
  -1   2   5  506.28   12.84
   1  -2  -5  500.10   10.88
  -1   2   4   77.28    4.52
  -1   2   4   73.70    2.85
   1  -2  -4   73.87    3.77
  -1   2   3 3173.86   24.43
  -1   2   3 3188.08   14.32
  -1   2   2   98.70    3.65
  -1   2   2   93.24    1.60
   1  -2  -2   95.63    3.06
  -1   2   1  667.30    7.96
   1  -2  -1  674.79    5.65
  -1   2   0  114.72    2.52
  -1   2   0  116.69    3.07
  -1   2  -1  306.39    5.28
  -1   2  -1  310.11    5.13
  -1   2  -1  303.30    5.05
  -1   2  -2 2812.08   18.69
  -1   2  -2 2657.55   16.18
  -1   2  -3 3588.32   23.53
  -1   2  -3 3964.43   25.56
  -1   2  -4   44.74    3.28
  -1   2  -4   42.55    3.16
  -1   2  -5 3809.74   31.13
  -1   2  -5 3844.78   31.70
  -1   2  -6  321.95    9.85
  -1   2  -6  324.53   10.39
  -1   2  -7 1191.27   20.40
  -1   2  -7 1209.52   21.87
  -1   2  -8 1439.91   24.12
  -1   2  -8 1392.22   24.91
  -1   2  -9   35.18    4.33
   1  -2  10  343.04   14.07
  -1   2 -10  368.47   14.01
   1  -2  11   34.82    5.44
   1  -2  11   30.42    4.51
   1  -2  12  994.12   26.26
   1  -2  13  686.57   21.63
   1  -2  14    4.99    3.07
   1  -2  15   -2.18    2.28
   1  -2  16    4.49    1.89
   1  -2  17   44.65    3.43
  -1   1  17  561.03   11.58
  -1   1  16  571.18   14.93
  -1   1  15  187.25   10.02
  -1   1  14  938.86   23.99
  -1   1  14  872.77   20.30
  -1   1  13    7.60    3.02
  -1   1  13    9.10    3.10
  -1   1  12  340.30   15.17
  -1   1  12  338.22   13.93
  -1   1  11   24.75    4.12
  -1   1  11   15.95    3.90
  -1   1  11   18.00    3.85
  -1   1  10  415.13   16.34
   1  -1  -9  843.98   19.94
  -1   1   9  787.92   16.98
  -1   1   8 1659.04   22.88
   1  -1  -8 1657.47   25.98
  -1   1   7   42.69    3.51
   1  -1  -7   41.93    4.13
  -1   1   6 1613.39   18.92
   1  -1  -6 1733.19   22.09
  -1   1   5   10.25    1.55
   1  -1  -5   11.43    1.85
  -1   1   4  715.52    9.79
   1  -1  -4  761.58   11.50
  -1   1   3 1000.39    9.58
   1  -1  -3 1007.03   11.24
   1  -1  -2 1933.99   12.42
  -1   1   2 1973.21   10.64
  -1   1   1  743.30    5.17
  -1   1   1  734.40    7.08
  -1   1   0 4497.29   15.83
  -1   1   0 4411.81   14.06
  -1   1  -1 1014.44    7.71
  -1   1  -1 1006.54    8.64
  -1   1  -2  798.15    9.30
  -1   1  -2  813.48    9.38
  -1   1  -3 2578.76   19.40
  -1   1  -3 2590.04   20.08
  -1   1  -4    6.70    1.55
  -1   1  -4    5.09    1.50
  -1   1  -5 1788.50   21.60
  -1   1  -5 1777.82   20.54
  -1   1  -6 2437.59   27.75
  -1   1  -6 2395.79   25.82
  -1   1  -7   -0.53    1.42
  -1   1  -7   15.59    2.63
  -1   1  -8 1000.76   21.43
  -1   1  -8  963.81   19.35
  -1   1  -9  123.07    8.13
  -1   1  -9  113.36    7.21
   1  -1  10  522.71   16.86
   1  -1  11 1509.66   29.88
   1  -1  11 1661.30   33.31
   1  -1  12  155.81   10.54
   1  -1  13  180.19   11.30
   1  -1  14    5.76    3.20
   1  -1  15    0.16    1.51
   1  -1  16    0.81    1.50
   1  -1  17  101.09    4.71
  -1   0  17    1.63    1.50
  -1   0  16  120.82    7.57
  -1   0  15   24.97    4.25
  -1   0  14   41.98    5.52
  -1   0  13  596.43   20.21
  -1   0  12  169.91   11.13
  -1   0  12  165.82   10.69
  -1   0  11  597.84   19.42
  -1   0  10  435.80   13.97
  -1   0   9  438.36   13.12
  -1   0   8  971.90   18.25
   1   0  -7  164.78    7.46
  -1   0   7  152.19    6.76
  -1   0   6   10.11    1.92
   1   0  -6    7.73    1.94
   1   0  -5   83.42    4.40
  -1   0   5   76.12    3.98
   1   0  -4 2567.51   21.00
  -1   0   4 2401.51   19.33
   1   0  -3 2697.28   18.12
  -1   0   3 2721.34   17.52
  -1   0   2 1139.88    9.32
  -1   0   1 2611.02   11.71
  -1   0   1 2675.07   10.77
  -1   0   0 2629.86   10.98
  -1   0   0 2581.88    9.66
  -1   0  -1  125.71    3.05
  -1   0  -2  433.75    6.57
  -1   0  -2  440.60    7.09
  -1   0  -3  499.32    8.26
  -1   0  -3  536.23    9.31
  -1   0  -4   86.74    3.96
  -1   0  -4   82.67    4.37
  -1   0  -5  276.45    7.92
  -1   0  -5  249.09    8.22
  -1   0  -6 5151.86   41.01
  -1   0  -6 4967.88   36.78
  -1   0  -7 4540.84   42.03
  -1   0  -7 4547.78   37.83
  -1   0  -8  722.17   16.36
  -1   0  -8  732.02   18.38
  -1   0  -9  817.31   18.66
  -1   0  -9  812.92   21.10
   1   0  10  338.90   14.63
  -1   0 -10  329.82   14.20
   1   0  11  266.72   13.60
   1   0  12  131.89    9.79
   1   0  13    5.34    2.74
   1   0  14    5.63    2.99
   1   0  15   75.96    6.15
   1   0  16   12.95    2.48
  -1  -1  18  138.42    5.37
  -1  -1  17   67.59    5.01
  -1  -1  16    3.03    2.16
  -1  -1  15  414.60   15.82
  -1  -1  14  126.56    9.60
  -1  -1  13 1034.17   26.68
  -1  -1  12 1476.82   31.21
  -1  -1  11  130.43    8.41
  -1  -1  10   68.92    5.73
  -1  -1   9   72.99    5.62
  -1  -1   8  147.36    7.46
  -1  -1   7   50.78    4.14
  -1  -1   6 1596.37   20.60
  -1  -1   5  183.12    6.41
  -1  -1   4 1444.57   15.92
  -1  -1   3 1892.10   15.98
  -1  -1   2  168.97    4.09
  -1  -1   1 2387.03   12.87
  -1  -1   0 1525.95    9.25
   1   1   0 1517.16    8.58
   1   1   1    9.48    0.64
  -1  -1  -1    8.55    1.06
  -1  -1  -2 5493.53   22.74
  -1  -1  -2 5424.13   27.05
  -1  -1  -3   37.19    2.26
  -1  -1  -3   40.67    2.88
  -1  -1  -4 3635.07   24.48
  -1  -1  -4 3511.96   28.41
  -1  -1  -5 5325.41   39.64
  -1  -1  -5 5410.90   33.95
  -1  -1  -6    1.43    1.25
  -1  -1  -6    1.03    1.38
  -1  -1  -7  926.03   16.70
  -1  -1  -7  865.95   19.10
  -1  -1  -8  380.45   11.53
  -1  -1  -8  393.41   13.89
  -1  -1  -9 1246.36   26.64
  -1  -1 -10  158.68   10.22
   1   1  10  137.29    8.99
   1   1  10  132.99    9.34
   1   1  11  260.40   12.55
   1   1  11  275.05   13.83
   1   1  12   23.26    4.28
   1   1  12   18.82    3.70
   1   1  13   73.80    6.35
   1   1  13   81.29    7.43
   1   1  14   13.85    3.19
   1   1  15  230.95    9.71
   1   1  16  111.31    5.22
  -1  -2  18  111.37    5.16
  -1  -2  17  143.83    7.51
  -1  -2  16   16.53    3.54
  -1  -2  15  129.55    9.19
  -1  -2  14  939.10   25.00
  -1  -2  13  326.10   14.97
  -1  -2  12  431.32   16.87
  -1  -2  12  365.69   14.91
  -1  -2  11   24.06    3.80
  -1  -2  10   67.96    5.92
  -1  -2   9  145.93    8.13
  -1  -2   8  399.01   12.62
  -1  -2   7  426.28   12.08
  -1  -2   6  199.15    7.72
  -1  -2   5  861.11   14.48
  -1  -2   4  229.89    6.82
  -1  -2   3  179.69    5.34
  -1  -2   2  923.03   10.39
  -1  -2   1  722.41    7.96
  -1  -2   0 6768.59   21.50
   1   2   0 6711.56   22.93
   1   2   1  517.71    7.09
   1   2   1  522.52    6.37
  -1  -2  -2 1320.14   14.81
  -1  -2  -2 1233.27   10.73
  -1  -2  -3 1786.65   19.22
  -1  -2  -3 1725.31   14.45
  -1  -2  -4  445.72    8.37
  -1  -2  -4  457.18   10.89
  -1  -2  -5 1389.07   21.04
  -1  -2  -5 1371.51   16.66
  -1  -2  -6  862.02   14.32
  -1  -2  -6  854.17   18.06
  -1  -2  -7  301.55   11.75
  -1  -2  -8  207.86   10.45
  -1  -2  -9  178.57   10.44
  -1  -2 -10   99.31    8.53
   1   2  10   94.93    7.73
   1   2  10   93.80    8.57
   1   2  10  101.68    8.20
   1   2  11  221.74   11.77
   1   2  11  209.56   12.01
   1   2  12  135.21    8.90
   1   2  12  118.43    8.92
   1   2  13   -1.01    1.98
   1   2  13    3.12    2.26
   1   2  14  214.25    9.92
   1   2  14  216.38    8.70
   1   2  15    8.56    1.95
   1   2  16   35.01    2.64
  -1  -3  18  140.79    5.83
  -1  -3  17   80.34    5.61
  -1  -3  16  269.24   11.77
  -1  -3  15   83.84    7.35
   1   3 -14  176.64   10.04
  -1  -3  14  180.94   11.11
  -1  -3  13  631.86   20.67
   1   3 -13  583.61   18.79
  -1  -3  12   48.89    5.98
   1   3 -12   48.17    5.89
  -1  -3  12   48.69    5.58
  -1  -3  11   56.28    5.93
  -1  -3  10   25.00    4.10
  -1  -3   9   63.88    5.73
  -1  -3   8   96.69    6.54
  -1  -3   7 2079.59   27.56
  -1  -3   6  108.25    6.06
  -1  -3   5 1205.94   18.02
  -1  -3   4   13.36    2.08
  -1  -3   3    3.52    1.14
  -1  -3   2   18.82    1.78
  -1  -3   1 9099.15   30.96
   1   3   0  151.86    4.30
   1   3   0  151.13    2.63
  -1  -3  -1 2997.06   22.02
   1   3   1 3009.79   18.88
   1   3   1 2981.79   20.84
   1   3   2   28.33    1.97
  -1  -3  -2   35.84    2.85
   1   3   2   30.94    2.52
  -1  -3  -2   28.83    1.68
   1   3   2   28.17    2.25
  -1  -3  -3 4502.43   22.64
  -1  -3  -3 4595.18   33.14
  -1  -3  -4  803.94   10.82
  -1  -3  -4  789.37   15.23
  -1  -3  -5  318.93   10.74
  -1  -3  -6  423.03   13.46
  -1  -3  -7   19.29    3.50
   1   3   7   18.18    3.52
  -1  -3  -8  708.88   19.90
   1   3   8  670.79   21.06
   1   3   9  212.90   11.60
  -1  -3  -9  245.04   12.58
   1   3   9  231.36   13.19
   1   3   9  221.80   11.86
   1   3  10  197.47   11.50
   1   3  10  179.19   11.05
   1   3  11   66.46    6.57
   1   3  11   62.75    6.40
   1   3  12    8.87    2.51
   1   3  12    7.40    2.76
   1   3  13   35.01    4.04
   1   3  13   34.37    4.43
   1   3  14  143.70    6.97
   1   3  15  278.56    8.66
  -1  -4  18  351.43    8.83
  -1  -4  17   18.11    3.01
   1   4 -16  273.43   10.34
  -1  -4  16  271.04   11.59
  -1  -4  15  145.32    9.54
   1   4 -15  151.41    9.00
  -1  -4  14    0.36    2.22
   1   4 -14    2.41    2.19
  -1  -4  13   90.86    7.84
   1   4 -13   85.71    7.69
  -1  -4  12    6.51    3.20
  -1  -4  12    4.29    1.69
   1   4 -12    6.34    2.37
  -1  -4  11   14.07    3.42
  -1  -4  10   58.86    6.01
  -1  -4   9  237.52   11.22
  -1  -4   8  881.88   20.04
  -1  -4   7  402.39   12.74
  -1  -4   6 1624.47   23.63
  -1  -4   5  121.25    6.11
  -1  -4   4 2007.34   22.04
  -1  -4   3  506.95   10.06
  -1  -4   2   27.61    2.21
   1   4  -1 5048.33   29.43
  -1  -4   1 5038.94   24.69
   1   4   0 1058.82   14.19
   1   4   0 1070.62   13.33
  -1  -4   0 1079.31    9.73
   1   4   0 1028.66    7.43
  -1  -4   0 1046.00   13.81
   1   4   1 2375.58   19.93
  -1  -4  -1 2379.61   22.04
   1   4   1 2407.86   16.31
   1   4   2 2348.62   20.23
  -1  -4  -2 2365.37   23.94
   1   4   2 2348.25   22.64
   1   4   3 1062.70   16.06
  -1  -4  -3 1051.63   17.26
   1   4   3 1024.83   17.13
  -1  -4  -4 1147.72   19.73
   1   4   4 1147.90   17.54
   1   4   5    4.39    1.41
   1   4   5    2.95    1.20
   1   4   6   34.74    4.93
  -1  -4  -6   33.94    4.32
   1   4   7  141.87    9.69
  -1  -4  -7  138.75    8.73
   1   4   8    2.94    2.23
  -1  -4  -8    0.71    2.26
   1   4   9  353.27   14.82
   1   4   9  359.02   15.52
   1   4  10  152.16    9.93
   1   4  10  140.84    9.88
   1   4  11  108.72    8.06
   1   4  11  110.07    8.36
   1   4  12   14.41    3.15
   1   4  12    7.84    2.56
   1   4  13   98.13    5.95
   1   4  13   99.69    6.48
   1   4  14  138.44    6.86
   1   5 -17  566.51   12.49
  -1  -5  17  584.46   13.78
  -1  -5  16    1.19    1.24
   1   5 -16    3.75    1.66
   1   5 -15  125.55    8.48
  -1  -5  15  112.01    7.93
   1   5 -14    4.36    2.05
  -1  -5  14    4.17    2.44
   1   5 -13  179.60   11.04
  -1  -5  13  185.22   10.90
   1   5 -12   63.09    6.98
  -1  -5  12   63.35    6.97
  -1  -5  12   59.61    6.40
   1   5 -11  209.57   11.80
   1   5 -11  196.46   11.30
  -1  -5  11  200.15   11.67
  -1  -5  10   75.53    7.02
  -1  -5   9  239.77   11.70
  -1  -5   8 1810.85   30.02
  -1  -5   7  329.69   12.06
  -1  -5   6  254.45    9.91
  -1  -5   5  651.13   14.60
  -1  -5   4  512.92   11.83
  -1  -5   3 4258.06   30.83
   1   5  -2 1247.48   17.11
  -1  -5   2 1261.54   14.79
  -1  -5   1  107.17    3.77
   1   5  -1   99.85    4.79
   1   5   0  758.68   12.95
  -1  -5   0  760.75   13.06
   1   5   0  749.82   13.72
   1   5   1  506.99   11.60
   1   5   1  489.27   10.41
  -1  -5  -1  511.57   11.35
   1   5   2 3384.62   27.77
  -1  -5  -2 3350.29   31.16
   1   5   3  165.85    7.19
  -1  -5  -3  167.73    7.56
  -1  -5  -4  185.09    8.55
   1   5   4  185.42    7.92
  -1  -5  -5    3.31    1.67
  -1  -5  -6    7.76    2.38
   1   5   7   14.46    3.45
  -1  -5  -7   12.70    3.35
   1   5   8  382.00   16.15
   1   5   9  211.00   12.19
   1   5  10   14.05    3.65
   1   5  11   14.36    3.45
   1   5  12    0.44    1.97
   1   5  13    0.16    1.61
   1   5  14  481.78    9.97
  -1  -6  17  256.62    8.09
   1   6 -17  274.18    9.09
   1   6 -16   52.96    5.06
  -1  -6  16   53.77    4.61
   1   6 -15    1.68    2.18
  -1  -6  15    3.67    2.12
  -1  -6  14   13.86    3.38
   1   6 -14   16.01    3.91
   1   6 -13  109.71    8.82
   1   6 -12  258.05   13.55
   1   6 -11  905.91   24.63
   1   6 -11  858.84   24.18
  -1  -6  11  876.86   25.02
   1   6 -11  812.38   21.34
  -1  -6  10 1097.82   27.02
  -1  -6   9    6.72    2.66
  -1  -6   8   23.89    3.99
  -1  -6   7  240.35   10.79
  -1  -6   6   76.04    5.79
  -1  -6   5 1384.77   22.24
  -1  -6   4 4848.09   38.08
   1   6  -3  871.58   16.66
  -1  -6   3  867.28   14.45
   1   6  -2 1267.11   19.22
  -1  -6   2 1354.22   15.78
   1   6  -1  516.45   12.05
  -1  -6   1  531.48   11.63
  -1  -6   0 2069.90   23.58
   1   6   0 2005.73   23.59
   1   6   1 1104.40   17.47
  -1  -6  -1 1137.36   18.51
   1   6   2  421.87   11.24
   1   6   2  431.69   12.51
  -1  -6  -2  443.23   12.24
  -1  -6  -3  319.37   11.14
   1   6   3  323.96   11.28
   1   6   4   22.82    3.35
  -1  -6  -4   15.14    2.77
  -1  -6  -5   61.90    5.84
   1   6   6   65.93    5.91
  -1  -6  -6   52.52    5.85
   1   6   6   70.75    6.71
   1   6   7  179.99   11.28
   1   6   8    0.19    2.28
   1   6   9  352.30   15.41
   1   6  10  189.69   12.30
   1   6  10  185.20   10.71
   1   6  11    1.76    1.91
   1   6  11    3.05    2.78
   1   6  12   18.36    2.88
   1   6  12   22.27    3.42
   1   6  13  194.36    6.93
   1   7 -17    2.15    1.29
   1   7 -16    5.39    2.20
   1   7 -15    3.28    2.43
   1   7 -14   51.79    5.97
   1   7 -13    1.08    2.20
   1   7 -13    5.43    2.33
   1   7 -12  124.31    9.61
   1   7 -12  149.47    9.58
   1   7 -11  348.31   14.61
  -1  -7  11  376.16   16.89
   1   7 -11  360.26   16.21
   1   7 -11  358.06   15.68
   1   7 -10 1093.55   26.82
  -1  -7  10 1222.98   29.48
  -1  -7   9  241.16   12.63
  -1  -7   8   82.07    7.13
  -1  -7   7    9.13    2.65
  -1  -7   6 1392.53   25.14
  -1  -7   5   31.82    3.77
   1   7  -4 3616.24   39.34
  -1  -7   4 3942.61   34.90
   1   7  -3  422.74   12.78
  -1  -7   2 3013.63   29.54
   1   7  -2 2913.42   32.37
   1   7  -1  109.30    6.20
  -1  -7   1  112.62    5.85
   1   7   0  560.26   13.76
  -1  -7   0  594.60   13.89
   1   7   1  479.28   12.94
  -1  -7  -1  478.38   13.06
  -1  -7  -2  423.02   12.87
   1   7   3   -1.50    1.44
  -1  -7  -3    4.05    2.09
   1   7   4   27.11    4.09
   1   7   4   16.58    3.86
   1   7   4   17.53    3.71
   1   7   5   63.34    6.59
   1   7   5   64.27    8.32
   1   7   5   59.99    6.29
   1   7   6   24.89    4.38
   1   7   6   21.26    4.58
   1   7   6   18.16    4.35
   1   7   7   62.95    7.05
   1   7   7   42.54    7.05
   1   7   7   59.07    5.89
   1   7   8  275.43   13.57
   1   7   8  256.07   15.58
   1   7   9   10.30    3.24
   1   7   9    7.53    3.57
   1   7  10  161.44   10.29
   1   7  10  167.26    9.37
   1   7  11   46.14    4.82
   1   7  11   49.39    4.59
   1   7  12  104.86    5.38
   1   8 -17   54.35    3.94
   1   8 -16  159.73    8.13
   1   8 -15   -1.03    2.35
   1   8 -14  297.97   11.41
   1   8 -14  324.44   14.23
   1   8 -13   45.48    5.32
   1   8 -13   42.98    5.65
   1   8 -12   25.61    4.95
   1   8 -12   29.46    4.94
   1   8 -11  951.99   24.76
   1   8 -11  932.76   25.24
   1   8 -11  927.35   26.35
   1   8 -10  472.04   18.76
   1   8 -10  453.98   17.44
  -1  -8  10  467.62   19.03
   1   8  -9  162.74   10.50
  -1  -8   9  165.06   10.93
  -1  -8   8  115.23    8.79
   1   8  -8  127.62    9.39
  -1  -8   7  180.82   10.15
   1   8  -7  158.26   10.75
  -1  -8   6 3291.12   39.48
   1   8  -6 3010.62   43.34
   1   8  -5 1063.38   24.27
   1   8  -4 1064.51   23.14
   1   8  -3  895.75   20.43
   1   8  -2  411.10   13.37
   1   8  -1  891.39   19.15
   1   8   0   16.26    2.83
   1   8   1  305.55   11.35
   1   8   2   23.75    4.17
   1   8   2   34.29    5.24
   1   8   2   37.20    5.17
   1   8   3  274.65   13.06
   1   8   3  290.57   12.98
   1   8   4  234.30   12.33
   1   8   4  256.50   15.53
   1   8   4  230.68   12.04
   1   8   5  179.84   10.61
   1   8   5  188.22   13.83
   1   8   5  173.09   10.81
   1   8   6    9.42    2.92
   1   8   6    9.91    3.10
   1   8   6    6.66    2.85
   1   8   7   79.35    8.91
   1   8   7   79.06    7.50
   1   8   7   79.33    6.56
   1   8   8   25.22    4.22
   1   8   8   27.09    5.30
   1   8   9  465.63   15.10
   1   8   9  460.70   17.24
   1   8  10    0.29    1.68
   1   8  11  542.31   12.06
   1   9 -17   26.70    2.56
   1   9 -16  137.44    7.07
   1   9 -15   -1.61    1.97
   1   9 -14  158.80    8.28
   1   9 -14  161.00    9.79
   1   9 -13   77.01    6.62
   1   9 -13   76.98    7.35
   1   9 -12  262.90   13.85
   1   9 -12  253.73   12.81
   1   9 -11  117.13    9.13
   1   9 -11  125.45    9.91
   1   9 -11  114.28    8.95
   1   9 -10  426.99   16.98
   1   9 -10  403.48   17.73
   1   9 -10  419.67   17.24
   1   9  -9    6.03    2.14
   1   9  -9    1.07    2.58
   1   9  -8 1910.95   40.22
   1   9  -8 2015.81   38.60
   1   9  -8 1959.43   37.13
   1   9  -8 1966.76   35.71
   1   9  -7  784.00   22.61
   1   9  -7  711.08   23.74
   1   9  -6  907.92   25.29
   1   9  -6  976.45   24.49
   1   9  -5  287.27   13.65
   1   9  -5  299.78   13.29
   1   9  -4   13.25    3.45
   1   9  -4   12.96    3.28
   1   9  -3  290.19   13.13
   1   9  -3  259.72   11.79
   1   9  -2  140.56    8.77
   1   9  -2  144.22    9.06
   1   9  -2  135.63    8.44
   1   9  -2  134.48    9.11
   1   9  -1  413.14   16.50
   1   9  -1  374.36   15.17
   1   9  -1  375.52   14.92
   1   9  -1  389.56   13.74
   1   9   0  158.97   10.16
   1   9   0  142.12    8.39
   1   9   0  160.97   10.73
   1   9   0  146.66    9.73
   1   9   1  181.06   10.90
   1   9   1  187.10   11.62
   1   9   1  205.77   12.68
   1   9   2    7.22    2.59
   1   9   2   12.56    3.60
   1   9   3   11.85    3.35
   1   9   3   12.68    4.03
   1   9   4    3.33    2.10
   1   9   4    5.53    3.97
   1   9   4    5.80    2.70
   1   9   5   39.65    5.34
   1   9   5   34.14    6.25
   1   9   5   43.21    5.35
   1   9   6   83.43    6.86
   1   9   6   69.64    6.84
   1   9   6   67.12    7.94
   1   9   7  305.03   15.53
   1   9   7  317.15   13.09
   1   9   8  144.80    9.57
   1   9   9  552.52   15.37
   1   9  10  210.43    7.21
   1  10 -16   16.48    2.43
   1  10 -15   95.07    6.23
   1  10 -15   78.80    4.47
   1  10 -14    2.17    1.88
   1  10 -14    1.44    2.02
   1  10 -13   33.01    4.52
   1  10 -13   37.41    5.18
   1  10 -12  343.25   14.37
   1  10 -12  378.96   16.11
   1  10 -11   99.79    8.84
   1  10 -11  102.65    8.49
   1  10 -10  510.11   19.73
   1  10 -10  522.88   18.49
   1  10 -10  499.36   19.11
   1  10  -9  740.93   22.14
   1  10  -9  727.87   23.66
   1  10  -8   12.79    3.88
   1  10  -7 1587.35   33.38
   1  10  -6   47.50    6.16
   1  10  -5  447.11   17.65
   1  10  -5  438.99   17.12
   1  10  -4   22.40    3.73
   1  10  -4   22.63    3.90
   1  10  -4   22.99    4.11
   1  10  -4   24.93    4.57
   1  10  -3   26.22    4.07
   1  10  -3   19.43    3.80
   1  10  -3   24.56    3.74
   1  10  -3   21.55    4.63
   1  10  -2  607.08   18.46
   1  10  -2  644.87   21.07
   1  10  -2  614.62   19.36
   1  10  -2  607.09   19.80
   1  10  -1    5.68    2.65
   1  10  -1    9.47    2.89
   1  10  -1   10.87    3.35
   1  10   0    0.66    1.92
   1  10   0   -0.33    1.91
   1  10   0    3.85    2.10
   1  10   1    8.00    2.93
   1  10   1    5.46    2.66
   1  10   2    2.20    2.32
   1  10   2    4.73    2.95
   1  10   3   78.45    7.81
   1  10   3   79.56    8.70
   1  10   4   68.82    8.22
   1  10   4   71.90    7.03
   1  10   5  599.87   18.35
   1  10   5  532.92   21.03
   1  10   6   28.07    4.89
   1  10   7  168.12    9.75
   1  10   8  192.78    8.64
   1  10   9    2.60    0.98
   1  11 -15  125.08    6.15
   1  11 -15   91.73    4.11
   1  11 -14  349.86   10.61
   1  11 -14  372.41   12.29
   1  11 -13  151.85    8.91
   1  11 -13  155.79    8.43
   1  11 -12   72.22    6.66
   1  11 -12   74.79    7.01
   1  11 -11  586.95   19.52
   1  11 -11  576.27   19.19
   1  11 -10   24.22    4.78
   1  11 -10   26.08    5.03
   1  11 -10   24.24    4.00
   1  11  -9 1299.94   31.79
   1  11  -8    4.51    2.50
   1  11  -7 1010.33   26.87
   1  11  -6  130.41    8.87
   1  11  -6  138.47   10.09
   1  11  -5   45.13    6.01
   1  11  -5   53.92    5.94
   1  11  -4  170.11   10.67
   1  11  -4  170.56   11.09
   1  11  -4  160.19    9.65
   1  11  -3   51.49    6.46
   1  11  -3   54.60    6.26
   1  11  -3   53.62    6.00
   1  11  -2   23.24    4.30
   1  11  -2   17.59    3.43
   1  11  -2   19.32    4.22
   1  11  -1  248.38   13.84
   1  11  -1  239.25   13.12
   1  11  -1  241.96   12.97
   1  11   0  155.08   10.65
   1  11   0  155.75   11.33
   1  11   1    9.06    3.16
   1  11   1   11.90    3.54
   1  11   2    7.29    3.42
   1  11   2   11.02    3.49
   1  11   3   10.45    3.29
   1  11   3   17.89    3.73
   1  11   4   30.75    5.29
   1  11   4   39.45    5.14
   1  11   5  386.84   15.40
   1  11   6  404.26   13.83
   1  11   7    1.78    1.10
   1  12 -14   87.86    4.73
   1  12 -14   96.49    4.86
   1  12 -13  279.24    9.92
   1  12 -13  299.76   10.32
   1  12 -12    5.86    2.62
   1  12 -12    5.46    1.94
   1  12 -11  374.18   14.56
   1  12 -10  139.65    9.78
   1  12  -9  389.48   17.06
   1  12  -8  729.68   22.54
   1  12  -8  728.15   24.01
   1  12  -7  123.24   10.42
   1  12  -7  132.32    9.65
   1  12  -6   -1.54    2.56
   1  12  -6    5.48    3.41
   1  12  -6    2.68    1.71
   1  12  -5    6.86    3.11
   1  12  -5    5.05    2.93
   1  12  -5    7.68    2.86
   1  12  -4    3.95    2.67
   1  12  -4    4.27    2.41
   1  12  -4    1.52    1.53
   1  12  -3  131.11    9.93
   1  12  -3  120.97    9.06
   1  12  -2  151.65    9.94
   1  12  -2  160.27   10.42
   1  12  -2  157.06   10.87
   1  12  -1    2.73    2.37
   1  12  -1    5.76    2.92
   1  12   0   62.03    6.64
   1  12   0   70.48    7.79
   1  12   1   55.60    6.80
   1  12   1   56.17    6.31
   1  12   2   61.39    6.76
   1  12   3    6.56    2.68
   1  12   4  668.79   18.28
   1  12   5   11.78    2.53
   1  13 -13  351.65    9.13
   1  13 -12  218.89    8.78
   1  13 -11  165.46    8.79
   1  13 -10  449.36   15.62
   1  13  -9    4.92    2.89
   1  13  -8  199.93   12.04
   1  13  -7   95.62    8.49
   1  13  -7  101.11    8.37
   1  13  -6    4.96    2.91
   1  13  -6    3.52    1.56
   1  13  -5   16.90    3.69
   1  13  -5   18.97    4.06
   1  13  -5   19.55    3.61
   1  13  -4    4.51    2.82
   1  13  -3   35.73    5.37
   1  13  -2   70.12    7.21
   1  13  -1   68.05    7.11
   1  13   0   23.02    4.27
   1  13   1    2.86    2.28
   1  13   2  112.40    7.49
   1  13   3   49.82    4.44
   1  14 -11   41.73    3.61
   1  14 -10  117.33    6.71
   1  14  -9   74.63    5.94
   1  14  -8  101.07    6.99
   1  14  -7   27.84    3.79
   1  14  -6   82.60    7.31
   1  14  -6   66.92    5.43
   1  14  -5  138.48    8.97
   1  14  -4   58.68    6.15
   1  14  -3   24.39    4.25
   1  14  -2   70.05    6.35
   1  14  -1   15.26    3.14
   1  14   0  162.23    8.19
   1  14   1   30.36    3.24
  -2  15  -4  153.76    8.52
  -2  15  -5  376.97   12.79
  -2  15  -6   77.65    5.64
  -2  14   2  320.92   11.61
  -2  14   1  157.04    8.20
  -2  14   1  190.92    9.51
  -2  14   0    9.09    2.53
  -2  14   0   11.82    2.83
  -2  14  -1  260.57   10.86
  -2  14  -1  242.61   11.98
  -2  14  -1  244.36   11.60
  -2  14  -2   -0.31    2.23
  -2  14  -2    0.17    2.87
  -2  14  -3  253.74   12.63
  -2  14  -3  262.76   12.54
  -2  14  -4  377.58   14.99
  -2  14  -4  350.49   14.64
  -2  14  -5   42.83    5.42
  -2  14  -6  528.11   16.00
  -2  14  -6  527.36   17.22
  -2  14  -7    9.19    2.82
  -2  14  -7    5.91    2.53
  -2  14  -8  172.37    9.27
  -2  14  -8  163.54    8.69
  -2  14  -9  284.23   10.11
  -2  14  -9  301.61   11.41
  -2  14 -10   52.64    4.45
  -2  14 -11  103.97    5.21
  -2  13   5    0.45    1.45
  -2  13   4    6.93    2.18
  -2  13   4    8.20    2.51
  -2  13   3  509.61   16.23
  -2  13   3  422.75   14.42
  -2  13   2   13.78    3.52
  -2  13   2   15.25    3.36
  -2  13   1  542.93   18.28
  -2  13   1  539.40   18.14
  -2  13   0   39.84    5.58
  -2  13   0   46.61    5.71
  -2  13   0   35.22    5.35
  -2  13  -1  298.41   14.18
  -2  13  -1  318.59   14.63
  -2  13  -1  308.77   13.43
  -2  13  -2  232.75   12.60
  -2  13  -2  241.49   11.27
  -2  13  -2  213.26   12.06
  -2  13  -3  182.22   11.25
  -2  13  -3  168.73   10.83
  -2  13  -4   90.68    8.25
  -2  13  -4   84.06    7.25
  -2  13  -4   83.80    7.89
  -2  13  -5  204.74   11.59
  -2  13  -5  200.69   11.85
  -2  13  -5  206.94   11.96
  -2  13  -6  221.88   12.41
  -2  13  -7  993.28   25.76
  -2  13  -8    2.23    3.02
  -2  13  -9   84.72    7.07
  -2  13 -10   34.52    4.55
  -2  13 -11   16.57    3.05
  -2  13 -12   19.55    2.73
  -2  12   7   18.24    2.43
  -2  12   6  129.66    7.25
  -2  12   6  111.78    6.53
  -2  12   5   17.97    3.34
  -2  12   5    9.15    2.73
  -2  12   4    2.04    2.47
  -2  12   4    1.72    1.12
  -2  12   3  255.62   12.99
  -2  12   3  229.28   12.46
  -2  12   2  435.33   17.36
  -2  12   2  432.43   17.55
  -2  12   2  437.35   17.32
  -2  12   1   33.02    5.20
  -2  12   1   25.25    4.93
  -2  12   1   26.35    4.94
  -2  12   0  319.15   15.00
  -2  12   0  314.10   14.89
  -2  12   0  323.49   14.87
  -2  12  -1   13.86    3.91
  -2  12  -1   25.43    4.32
  -2  12  -1   16.95    4.04
  -2  12  -2  637.51   21.21
  -2  12  -2  685.66   19.84
  -2  12  -2  645.42   21.20
  -2  12  -3  613.58   20.67
  -2  12  -4   50.16    6.51
  -2  12  -4   54.94    6.56
  -2  12  -5  620.27   21.71
  -2  12  -5  632.79   20.96
  -2  12  -6  146.38   10.89
  -2  12  -6  144.51   10.37
  -2  12  -7  595.54   21.33
  -2  12  -8  129.17   10.05
  -2  12  -9  157.49   10.47
  -2  12 -10   80.73    7.22
  -2  12 -10   74.52    6.36
  -2  12 -11   12.39    2.73
  -2  12 -11    9.90    2.92
  -2  12 -12   -0.69    1.60
  -2  12 -12    5.81    2.12
  -2  12 -13  228.76    7.94
  -2  11   8    5.15    1.52
  -2  11   8    5.25    1.69
  -2  11   7  200.70    9.30
  -2  11   7  180.68    9.49
  -2  11   6    7.14    2.67
  -2  11   6    2.89    1.69
  -2  11   5  139.86   10.16
  -2  11   5  162.48   10.01
  -2  11   4  201.49   11.78
  -2  11   4  181.14   11.87
  -2  11   3    7.29    2.51
  -2  11   3    7.41    2.66
  -2  11   3    0.68    2.19
  -2  11   2  516.34   19.32
  -2  11   2  513.52   19.60
  -2  11   2  500.85   19.07
  -2  11   1   57.25    6.55
  -2  11   1   55.03    6.75
  -2  11   1   57.82    6.74
  -2  11   0  411.78   16.76
  -2  11   0  426.57   17.25
  -2  11   0  430.96   17.19
  -2  11  -1 1591.33   32.53
  -2  11  -1 1699.53   33.64
  -2  11  -1 1694.07   34.34
  -2  11  -1 1595.31   31.83
  -2  11  -2   17.40    3.40
  -2  11  -2   20.75    3.70
  -2  11  -2   22.24    4.40
  -2  11  -3  177.36   11.15
  -2  11  -3  168.01   10.61
  -2  11  -3  181.69   10.91
  -2  11  -4   19.52    3.91
  -2  11  -4   11.95    3.23
  -2  11  -5  287.57   15.14
  -2  11  -5  293.29   14.24
  -2  11  -6 1221.50   30.99
  -2  11  -6 1177.09   28.96
  -2  11  -7   11.59    4.34
  -2  11  -8  342.98   16.17
  -2  11  -9    0.06    2.11
  -2  11  -9   -0.31    1.28
  -2  11 -10  129.59    9.41
  -2  11 -10  134.13    9.34
  -2  11 -11   -0.45    2.51
  -2  11 -11    3.79    2.22
  -2  11 -12   55.05    5.33
  -2  11 -12   49.20    5.50
  -2  11 -13  138.71    7.13
  -2  11 -13  144.34    7.88
  -2  11 -14   59.29    3.70
  -2  11 -14   66.13    4.65
  -2  10  10    9.12    1.95
  -2  10   9   24.52    3.30
  -2  10   9   25.60    3.22
  -2  10   9   22.10    2.76
  -2  10   8   54.60    4.86
  -2  10   8   55.22    5.58
  -2  10   8   46.46    5.30
  -2  10   7  376.41   16.32
  -2  10   7  423.39   15.25
  -2  10   7  418.13   14.80
  -2  10   6  783.27   21.75
  -2  10   6  789.80   21.55
  -2  10   5   24.44    4.80
  -2  10   5   26.06    4.72
  -2  10   4  660.27   21.63
  -2  10   4  629.00   22.60
  -2  10   3   98.64    8.84
  -2  10   3   92.12    8.51
  -2  10   3  106.17    8.98
  -2  10   2   66.98    7.13
  -2  10   2   82.32    7.73
  -2  10   2   85.10    8.00
  -2  10   1  231.05   12.50
  -2  10   1  238.03   12.60
  -2  10   1  218.76   12.28
  -2  10   0   70.88    6.89
  -2  10   0   81.80    7.21
  -2  10   0   76.62    7.34
  -2  10   0   83.49    7.31
  -2  10   0   85.34    7.42
  -2  10  -1 1853.44   33.23
  -2  10  -1 1745.70   32.24
  -2  10  -1 1732.36   32.44
  -2  10  -1 1769.81   33.43
  -2  10  -2  869.22   23.06
  -2  10  -2  859.74   21.49
  -2  10  -2  865.99   22.78
  -2  10  -3  353.96   15.06
  -2  10  -3  318.78   14.03
  -2  10  -3  340.59   14.39
  -2  10  -3  336.43   15.02
  -2  10  -4  272.06   13.93
  -2  10  -4  296.63   14.20
  -2  10  -4  276.18   13.23
  -2  10  -5   92.96    8.52
  -2  10  -5   91.15    8.51
  -2  10  -5   89.65    8.06
  -2  10  -6  659.67   22.32
  -2  10  -6  626.84   20.78
  -2  10  -6  637.24   21.47
  -2  10  -7  651.41   22.36
  -2  10  -8   12.88    3.67
  -2  10  -8    4.40    3.05
  -2  10  -8   11.66    3.06
  -2  10  -9    5.64    2.30
  -2  10  -9    3.69    2.97
  -2  10  -9    8.02    2.85
  -2  10 -10    3.36    2.62
  -2  10 -10    4.85    3.23
  -2  10 -10    2.39    2.26
  -2  10 -11    2.77    2.74
  -2  10 -11    1.49    1.84
  -2  10 -11    4.52    2.39
  -2  10 -12    4.51    2.57
  -2  10 -12    5.27    3.00
  -2  10 -12    5.57    2.82
  -2  10 -13  452.45   13.69
  -2  10 -13  484.76   15.71
  -2  10 -14    4.72    1.46
  -2  10 -14    3.50    1.86
  -2   9  12   73.34    3.91
  -2   9  11   17.50    2.67
  -2   9  11   18.41    2.27
  -2   9  10   46.25    4.82
  -2   9  10   52.30    5.05
  -2   9   9    4.37    1.71
  -2   9   9    3.01    1.76
  -2   9   9    4.62    2.28
  -2   9   8  154.50   11.06
  -2   9   8  174.86    9.50
  -2   9   8  178.64   10.50
  -2   9   7   28.80    4.70
  -2   9   7   24.51    4.90
  -2   9   7   34.77    4.74
  -2   9   6  650.90   20.42
  -2   9   6  634.54   20.46
  -2   9   5  251.89   12.69
  -2   9   5  245.60   14.49
  -2   9   5  252.92   13.20
  -2   9   4   57.18    6.77
  -2   9   4   47.69    6.09
  -2   9   4   44.23    5.88
  -2   9   4   54.53    6.49
  -2   9   3  378.06   15.80
  -2   9   3  380.33   16.17
  -2   9   3  351.38   16.05
  -2   9   3  389.27   16.94
  -2   9   2   30.76    4.60
  -2   9   2   28.89    4.35
  -2   9   2   26.07    4.51
  -2   9   2   27.33    4.72
  -2   9   2   27.41    4.50
  -2   9   1  382.99   14.73
  -2   9   1  365.55   15.11
  -2   9   0 2032.95   32.25
  -2   9  -1   87.67    7.03
  -2   9  -2 1565.51   28.45
  -2   9  -3   50.97    5.61
  -2   9  -4 1545.67   29.85
  -2   9  -5  323.33   14.10
  -2   9  -5  324.12   14.75
  -2   9  -5  342.41   15.14
  -2   9  -6  115.22    8.90
  -2   9  -6  122.06    9.60
  -2   9  -6  125.85    9.08
  -2   9  -6  125.44    9.28
  -2   9  -7  166.13   11.03
  -2   9  -7  154.73   10.53
  -2   9  -7  149.92   11.04
  -2   9  -7  161.71   10.49
  -2   9  -8   11.51    3.66
  -2   9  -8   25.58    5.10
  -2   9  -8   25.86    4.77
  -2   9  -8   28.12    4.65
  -2   9  -9  134.04   10.11
  -2   9  -9  116.09   10.55
  -2   9  -9  134.34   10.09
  -2   9 -10  581.54   20.63
  -2   9 -10  541.33   22.40
  -2   9 -10  581.58   20.02
  -2   9 -11  201.68   11.46
  -2   9 -11  210.84   12.29
  -2   9 -11  225.23   14.02
  -2   9 -12  207.36   12.54
  -2   9 -12  195.29   11.38
  -2   9 -12  195.94   10.58
  -2   9 -13   14.91    3.06
  -2   9 -13   15.05    3.32
  -2   9 -13   15.69    3.68
  -2   9 -14  104.25    5.75
  -2   9 -14  103.70    7.05
  -2   9 -14  108.06    6.94
  -2   9 -15   31.92    3.60
  -2   8  13   56.38    3.62
  -2   8  12   21.83    2.70
  -2   8  12   24.58    3.35
  -2   8  11   12.69    2.81
  -2   8  11   12.99    3.26
  -2   8  10   73.98    7.00
  -2   8  10   81.35    6.94
  -2   8   9    1.92    2.30
  -2   8   9    5.54    2.58
  -2   8   9    0.09    1.43
  -2   8   8  280.84   13.80
  -2   8   8  262.93   15.47
  -2   8   8  266.99   12.21
  -2   8   7  761.24   22.82
  -2   8   7  800.47   21.86
  -2   8   6   46.97    5.80
  -2   8   6   46.21    5.76
  -2   8   6   44.61    6.19
  -2   8   6   33.96    5.01
  -2   8   5  525.69   18.29
  -2   8   5  558.78   19.74
  -2   8   5  495.36   17.72
  -2   8   5  510.49   19.32
  -2   8   5  524.55   20.69
  -2   8   4   43.46    5.47
  -2   8   4   34.77    5.55
  -2   8   4   47.37    5.75
  -2   8   3  982.22   24.58
  -2   8   2 2451.80   37.00
  -2   8   1    0.84    1.68
  -2   8   1    5.25    2.40
  -2   8   0 2101.94   29.91
  -2   8   0 2181.59   32.05
  -2   8  -1  529.01   14.99
  -2   8  -1  578.38   16.06
  -2   8  -2  270.30   10.98
  -2   8  -3  343.04   12.57
  -2   8  -4  106.85    7.35
   2  -8   5  214.44   10.61
  -2   8  -5  203.30   10.42
   2  -8   6   24.67    4.41
  -2   8  -6   24.00    4.14
   2  -8   7  142.06    9.94
  -2   8  -7  133.86    8.96
  -2   8  -7  135.19    9.57
  -2   8  -8    7.51    3.33
   2  -8   8    4.51    2.87
  -2   8  -8    3.34    2.50
  -2   8  -8    1.94    2.79
  -2   8  -8    4.94    2.87
   2  -8   9  220.46   13.42
  -2   8  -9  206.39   12.31
  -2   8  -9  184.43   13.33
  -2   8  -9  199.12   11.81
  -2   8 -10   25.34    5.30
  -2   8 -10   31.96    5.00
  -2   8 -10   33.26    5.58
  -2   8 -11   23.58    4.50
  -2   8 -11   21.88    4.40
  -2   8 -12  286.77   12.82
  -2   8 -12  303.11   14.44
  -2   8 -12  298.27   15.93
  -2   8 -13   67.22    7.21
  -2   8 -13   61.97    6.40
  -2   8 -13   53.39    5.15
  -2   8 -14  138.03    8.69
  -2   8 -14  125.87    8.14
  -2   8 -15  289.06   10.57
  -2   8 -15  288.71    9.86
  -2   7  14    7.61    1.57
  -2   7  13    6.82    1.95
  -2   7  13   10.33    1.95
  -2   7  12  352.83   12.93
  -2   7  12  359.82   12.94
  -2   7  11    6.54    3.14
  -2   7  11    6.68    3.03
  -2   7  10  127.90   10.21
  -2   7  10  140.51    9.66
  -2   7   9  292.52   16.36
  -2   7   9  291.21   12.06
  -2   7   9  303.49   14.46
  -2   7   8   98.37    7.44
  -2   7   8   82.11    8.93
  -2   7   8   87.04    7.78
  -2   7   7 1262.71   27.06
  -2   7   7 1226.61   28.70
  -2   7   7 1225.14   29.43
  -2   7   6  762.72   21.15
  -2   7   6  683.57   24.05
  -2   7   6  710.18   21.12
  -2   7   6  700.79   21.76
  -2   7   5  333.72   14.53
  -2   7   4  948.00   20.98
  -2   7   4  901.04   22.81
  -2   7   3   -0.08    1.26
  -2   7   3    0.38    1.98
  -2   7   2 1924.03   24.77
  -2   7   2 1861.83   29.19
  -2   7   1 1380.01   22.30
  -2   7   1 1427.36   19.93
  -2   7   1 1406.26   24.19
  -2   7   0  375.65    9.85
  -2   7   0  364.33   11.32
  -2   7   0  365.81   11.84
  -2   7  -1  617.11   14.80
  -2   7  -1  660.04   15.32
  -2   7  -1  651.69   12.66
  -2   7  -2  280.81   10.12
   2  -7   3 1329.67   21.64
  -2   7  -3 1251.00   21.77
  -2   7  -4  958.72   19.65
   2  -7   4 1053.20   21.24
   2  -7   5    9.75    2.73
  -2   7  -5    8.23    2.41
   2  -7   6   51.13    5.77
  -2   7  -6   60.44    5.59
   2  -7   7   14.78    3.84
  -2   7  -7    9.20    2.63
  -2   7  -8   74.66    6.28
   2  -7   8   80.83    7.68
  -2   7  -9  552.89   19.44
   2  -7   9  596.97   21.27
  -2   7  -9  574.10   19.24
  -2   7 -10  657.92   21.74
  -2   7 -10  622.20   20.04
  -2   7 -11  110.32    9.18
  -2   7 -11  109.98    8.39
  -2   7 -12    4.28    2.22
  -2   7 -12   -2.23    2.45
  -2   7 -13   98.34    8.75
  -2   7 -13   85.52    7.70
  -2   7 -14   -0.73    2.04
  -2   7 -14    2.70    1.94
  -2   7 -15  644.40   16.00
  -2   7 -15  628.94   16.01
  -2   7 -16  408.21    9.29
  -2   6  14   67.55    4.23
  -2   6  14   75.73    4.98
  -2   6  13  378.51   12.96
  -2   6  13  388.28   13.14
  -2   6  12  317.45   13.31
  -2   6  12  315.10   14.13
  -2   6  11  333.39   14.60
  -2   6  10  201.78   11.90
  -2   6   9  356.33   15.70
  -2   6   8  500.96   18.23
  -2   6   8  467.98   15.81
  -2   6   7   11.47    3.22
  -2   6   6  933.88   24.39
  -2   6   5  133.87    8.48
  -2   6   4 2219.03   30.48
  -2   6   3 3340.79   33.60
  -2   6   2  262.96    8.69
  -2   6   2  273.59    9.33
  -2   6   2  256.75    9.74
  -2   6   1  435.02   11.34
  -2   6   1  436.87   12.01
  -2   6   1  423.18   10.13
  -2   6   0  276.83    8.89
  -2   6   0  270.70    9.07
  -2   6   0  261.67    7.66
  -2   6  -1 2072.79   24.17
  -2   6  -1 1980.01   23.80
   2  -6   1 2075.42   19.87
  -2   6  -1 1979.08   20.82
  -2   6  -2  173.11    6.35
  -2   6  -2  166.67    7.07
  -2   6  -2  165.93    6.30
  -2   6  -2  172.11    6.96
  -2   6  -3   61.17    4.51
  -2   6  -3   61.55    4.40
  -2   6  -4   50.76    4.38
  -2   6  -4   58.24    4.59
  -2   6  -5   78.73    5.43
  -2   6  -5   71.40    5.56
  -2   6  -6    4.36    1.87
  -2   6  -6    4.62    1.88
  -2   6  -7   58.15    5.17
  -2   6  -7   64.87    5.99
  -2   6  -8  196.96    9.52
  -2   6  -8  217.60   11.41
  -2   6  -9  154.85   10.15
   2  -6   9  172.84   11.17
  -2   6 -10  199.23   10.90
   2  -6  10  217.89   13.00
  -2   6 -10  197.29   11.94
  -2   6 -11  444.88   16.05
  -2   6 -11  458.06   18.06
  -2   6 -12  103.34    8.60
   2  -6  13   54.44    5.71
  -2   6 -13   49.94    5.90
  -2   6 -14  636.42   18.54
   2  -6  14  652.17   17.74
  -2   6 -15   45.27    4.44
   2  -6  15   47.50    4.43
  -2   6 -15   46.67    4.70
  -2   6 -16 1127.56   17.00
  -2   5  15   18.45    2.25
  -2   5  15   25.18    2.72
  -2   5  14    7.50    2.21
  -2   5  14    5.84    2.28
  -2   5  13  172.48    9.52
  -2   5  12    2.05    2.76
  -2   5  11  415.69   16.70
  -2   5  10  480.81   18.09
  -2   5   9   55.87    7.16
  -2   5   9   37.21    5.10
  -2   5   8  633.19   22.04
  -2   5   7 1136.84   27.50
   2  -5  -6  723.19   15.54
  -2   5   6  606.71   18.59
   2  -5  -5 3867.53   32.55
  -2   5   5 3497.73   40.35
   2  -5  -4  931.41   14.06
  -2   5   4  880.70   18.18
  -2   5   3 4509.90   36.52
   2  -5  -3 4581.32   26.90
  -2   5   2    8.18    1.97
  -2   5   2   23.65    2.56
  -2   5   1  481.82   10.65
  -2   5   1  487.45   10.16
  -2   5   0   54.20    3.30
  -2   5   0   56.26    2.52
  -2   5   0   54.95    3.67
  -2   5   0   48.24    3.49
  -2   5  -1  213.68    6.41
  -2   5  -1  206.23    5.98
  -2   5  -1  208.06    6.75
  -2   5  -1  211.32    6.96
  -2   5  -2   40.56    3.06
  -2   5  -2   39.39    3.20
  -2   5  -2   41.16    3.00
  -2   5  -2   41.33    3.15
  -2   5  -3 1202.32   18.16
  -2   5  -3 1292.01   17.72
  -2   5  -4   83.73    4.80
  -2   5  -4   88.70    5.51
  -2   5  -5    3.95    1.86
  -2   5  -5    4.34    1.56
  -2   5  -6  174.47    8.71
  -2   5  -7   42.52    4.64
  -2   5  -8    5.16    2.06
  -2   5  -9 1055.54   25.14
   2  -5  10  437.76   16.32
  -2   5 -10  469.98   17.64
   2  -5  10  479.94   18.57
  -2   5 -10  422.16   16.78
  -2   5 -11  717.11   22.12
   2  -5  11  727.53   21.60
   2  -5  12  621.24   20.11
  -2   5 -12  598.27   20.20
  -2   5 -13  153.90   10.02
   2  -5  13  172.40   10.34
   2  -5  14  575.67   17.52
  -2   5 -14  590.78   17.59
   2  -5  15  324.49   11.71
   2  -5  16  218.96    7.78
  -2   5 -16  213.72    7.94
  -2   4  15  224.87    8.67
  -2   4  14   47.37    4.51
  -2   4  14   42.93    4.68
  -2   4  13   11.79    3.12
  -2   4  13   14.48    2.85
  -2   4  12  386.53   15.62
  -2   4  12  377.87   14.62
  -2   4  11    6.56    2.58
  -2   4  11    1.88    2.33
  -2   4  10 1338.70   29.41
  -2   4  10 1346.48   32.97
  -2   4   9 1086.66   28.67
   2  -4  -8 1046.73   21.33
  -2   4   8  874.83   24.45
   2  -4  -7  674.87   15.90
  -2   4   7  549.96   17.99
   2  -4  -6  134.87    6.56
  -2   4   6  119.08    7.77
   2  -4  -5 2014.57   22.28
  -2   4   5 1810.68   26.90
  -2   4   4 2247.21   26.90
   2  -4  -4 2330.68   21.22
   2  -4  -3 2677.25   19.40
  -2   4   3 2722.40   26.50
  -2   4   2  127.41    5.17
   2  -4  -2  120.98    3.29
  -2   4   2  121.44    5.05
  -2   4   1  343.26    4.68
  -2   4   1  349.93    7.85
  -2   4   1  348.75    8.04
  -2   4   0 1438.90   15.18
  -2   4   0 1452.31   15.86
  -2   4  -1  265.81    6.84
  -2   4  -1  257.51    6.53
  -2   4  -1  272.83    6.72
  -2   4  -1  252.26    6.46
  -2   4  -2  936.40   13.01
  -2   4  -2  938.48   12.97
  -2   4  -2  934.68   13.94
  -2   4  -2  949.76   12.29
  -2   4  -3   98.26    5.08
  -2   4  -3   96.74    4.36
  -2   4  -4  195.48    7.67
  -2   4  -5    8.79    2.13
  -2   4  -6    4.58    1.81
  -2   4  -7  914.22   20.16
  -2   4  -8  706.40   18.79
  -2   4  -9  320.61   13.42
   2  -4  10  909.66   23.59
  -2   4 -10  871.37   23.46
  -2   4 -10  928.92   24.12
   2  -4  11    9.82    2.81
  -2   4 -11    9.12    2.95
   2  -4  11    8.60    2.98
   2  -4  12  684.47   21.41
  -2   4 -12  654.76   20.66
   2  -4  13    4.38    3.00
  -2   4 -13    3.74    2.38
  -2   4 -14  402.96   14.05
   2  -4  14  420.40   15.54
   2  -4  15  585.61   16.32
   2  -4  16  116.48    6.12
  -2   3  16   79.50    4.42
  -2   3  16   81.72    4.34
  -2   3  15  227.81    9.36
  -2   3  15  218.88    9.30
  -2   3  14   18.39    3.70
  -2   3  14   19.58    3.67
  -2   3  13   12.20    3.30
  -2   3  13   10.14    2.99
  -2   3  12  603.43   19.32
  -2   3  12  635.23   19.92
  -2   3  11 1439.64   30.19
  -2   3  11 1470.77   29.93
  -2   3  10   33.51    5.06
  -2   3  10   32.95    4.65
  -2   3   9 2853.71   43.87
   2  -3  -8   90.37    6.19
  -2   3   8   84.73    7.23
   2  -3  -7 2766.38   30.94
  -2   3   7 2446.79   35.04
   2  -3  -6   81.39    4.94
  -2   3   6   69.25    5.49
  -2   3   5  132.71    6.94
   2  -3  -5  147.97    5.90
  -2   3   4 1740.15   21.95
   2  -3  -4 1822.72   17.91
  -2   3   3  838.65    6.56
  -2   3   3  840.89   13.51
   2  -3  -3  855.47   10.41
   2  -3  -2 1003.27    8.63
  -2   3   2 1020.33   13.31
  -2   3   2  983.13    6.88
  -2   3   1  184.96    5.14
  -2   3   1  182.05    5.18
  -2   3   1  184.12    3.75
  -2   3   0   23.11    1.69
  -2   3   0   21.54    1.84
  -2   3   0   22.37    1.87
  -2   3  -1    3.67    0.95
  -2   3  -1    5.13    1.09
  -2   3  -1    4.91    1.15
  -2   3  -1    3.20    1.03
  -2   3  -2   27.51    2.37
  -2   3  -2   30.95    2.36
  -2   3  -2   27.76    2.03
  -2   3  -3  951.59   14.34
  -2   3  -3  870.22   12.42
  -2   3  -4    5.57    1.50
  -2   3  -4   11.54    2.15
  -2   3  -5   51.03    4.11
  -2   3  -5   44.93    3.92
  -2   3  -6   72.04    5.28
  -2   3  -6   75.01    5.38
  -2   3  -7   21.97    3.40
  -2   3  -7   16.30    2.88
  -2   3  -8 2481.81   34.32
  -2   3  -9  483.51   16.08
   2  -3  10  670.18   20.55
  -2   3 -10  686.91   20.34
  -2   3 -10  692.52   20.35
   2  -3  11  967.84   25.54
  -2   3 -11  967.95   24.55
   2  -3  11  982.09   26.18
   2  -3  12  469.73   18.07
  -2   3 -12  476.79   17.02
  -2   3 -13 1258.58   26.18
   2  -3  13 1226.52   28.38
   2  -3  14   73.88    6.93
   2  -3  15   88.12    6.56
   2  -3  16   66.99    4.78
  -2   2  17   83.15    4.17
  -2   2  16  417.15   12.16
  -2   2  15   25.09    3.29
  -2   2  15   22.28    3.78
  -2   2  14  106.44    8.09
  -2   2  14  110.67    7.75
  -2   2  13  348.31   14.30
  -2   2  13  317.78   14.14
  -2   2  12   27.25    4.40
  -2   2  12   22.01    4.07
  -2   2  11 1610.09   31.63
  -2   2  11 1585.98   30.65
  -2   2  10  816.22   23.58
  -2   2   9 1314.21   28.21
  -2   2   8  825.98   20.78
  -2   2   7 1149.41   22.52
  -2   2   7 1166.22   16.85
  -2   2   6 3923.92   27.93
  -2   2   6 3940.45   38.17
  -2   2   5   28.28    2.17
  -2   2   5   27.74    3.22
   2  -2  -5   32.48    2.83
   2  -2  -4   46.45    2.85
  -2   2   4   44.68    2.40
  -2   2   4   44.38    3.43
  -2   2   3  337.48    5.58
  -2   2   3  359.18    8.14
  -2   2   2  721.95   10.15
  -2   2   2  707.38    7.26
  -2   2   1   48.03    2.38
  -2   2   1   46.88    2.43
  -2   2   0   17.58    1.55
  -2   2   0   15.93    1.34
  -2   2   0   15.77    0.73
  -2   2   0   16.45    1.38
  -2   2  -1  237.14    5.44
  -2   2  -1  245.70    5.53
  -2   2  -1  244.19    4.60
  -2   2  -1  237.36    4.12
  -2   2  -1  232.87    4.31
  -2   2  -2  149.75    4.50
  -2   2  -2  159.25    3.78
  -2   2  -2  152.60    5.00
  -2   2  -3  643.75   11.22
  -2   2  -3  616.32   10.62
  -2   2  -4 1510.66   18.97
  -2   2  -4 1569.28   19.30
  -2   2  -5  147.95    6.65
  -2   2  -5  144.75    6.64
  -2   2  -6 1859.20   25.73
  -2   2  -6 1808.81   24.97
  -2   2  -7  338.83   12.04
  -2   2  -7  308.43   11.06
  -2   2  -8  824.55   20.40
  -2   2  -8  852.04   19.61
  -2   2  -9  946.54   23.08
  -2   2  -9  965.13   22.27
   2  -2  10  238.09   12.45
  -2   2 -10  230.29   11.65
   2  -2  11 2266.27   38.84
  -2   2 -11 2289.04   36.44
   2  -2  12  257.76   13.52
   2  -2  13  477.22   17.88
   2  -2  14  185.95   10.50
   2  -2  15    1.70    1.92
   2  -2  16    7.17    1.85
  -2   1  17   88.75    5.25
  -2   1  16  132.93    7.80
  -2   1  15  177.78   10.02
  -2   1  14    4.54    2.82
  -2   1  14    6.13    2.26
  -2   1  13  778.20   20.83
  -2   1  13  769.08   22.61
  -2   1  12  659.96   22.18
  -2   1  12  591.39   18.33
  -2   1  12  625.04   20.28
  -2   1  11  126.80    9.23
  -2   1  11  116.88    8.55
  -2   1  10 2217.91   37.00
  -2   1   9   16.58    2.65
  -2   1   9   18.81    3.40
  -2   1   8 3340.54   32.31
  -2   1   8 3419.04   39.62
  -2   1   7  387.21   10.15
  -2   1   7  379.21   12.31
  -2   1   6  545.20   11.00
  -2   1   6  563.23   13.54
  -2   1   5   25.89    2.29
  -2   1   5   24.80    2.85
  -2   1   4  589.25   10.96
  -2   1   4  587.26    9.22
  -2   1   3    2.32    0.94
  -2   1   3    2.36    0.75
  -2   1   2  292.99    5.16
  -2   1   2  299.75    5.90
  -2   1   1 3530.02   18.13
  -2   1   1 3443.99   16.91
  -2   1   0  982.13    9.48
  -2   1   0  957.97    7.49
  -2   1  -1  828.98    5.99
  -2   1  -1  823.73    8.72
  -2   1  -1  808.63    4.43
  -2   1  -1  827.77    9.84
  -2   1  -2 1156.76   12.56
  -2   1  -2 1140.70   12.94
  -2   1  -3  161.63    5.56
  -2   1  -3  166.15    5.57
  -2   1  -4 1252.61   16.67
  -2   1  -4 1236.17   17.31
  -2   1  -5  226.28    7.90
  -2   1  -5  214.01    8.00
  -2   1  -6 1968.73   25.52
  -2   1  -6 1913.69   26.21
  -2   1  -7 2885.35   33.35
  -2   1  -7 2821.97   34.58
  -2   1  -8   60.97    5.61
  -2   1  -8   60.08    5.24
  -2   1  -9  354.03   14.34
  -2   1  -9  371.54   13.69
   2  -1  10  100.52    8.36
  -2   1 -10  110.17    8.57
  -2   1 -10  104.42    7.59
   2  -1  11  238.22   13.03
   2  -1  12  645.54   21.36
   2  -1  13    1.87    2.79
   2  -1  14  125.78    8.67
   2  -1  15   63.28    5.53
   2  -1  16    2.53    1.32
  -2   0  18   25.66    2.54
  -2   0  17   91.81    5.94
  -2   0  16  148.88    8.70
  -2   0  15  477.05   16.96
  -2   0  14  864.46   23.96
  -2   0  13  905.50   24.82
  -2   0  12 2746.50   44.02
  -2   0  12 2729.58   42.49
  -2   0  11  232.41   12.30
  -2   0  10 1003.41   21.02
  -2   0  10  962.96   23.43
  -2   0   9  297.91   10.80
  -2   0   8  550.72   13.59
  -2   0   7  765.59   14.82
  -2   0   6  250.56    7.82
  -2   0   5  180.74    6.05
  -2   0   4  480.07    9.13
  -2   0   4  470.22    8.77
  -2   0   3   61.27    2.85
  -2   0   3   59.58    2.86
  -2   0   2  897.37    9.86
  -2   0   2  921.61    9.00
  -2   0   1 1093.43    8.74
  -2   0   1 1057.06    9.95
  -2   0   0   59.29    2.12
  -2   0   0   51.85    2.27
  -2   0  -1   26.73    1.89
  -2   0  -2  535.42    9.08
  -2   0  -2  514.18    8.57
  -2   0  -3 4241.83   27.27
  -2   0  -3 4187.61   28.96
  -2   0  -4   84.42    4.75
  -2   0  -4   88.96    4.50
  -2   0  -5 3935.24   35.09
  -2   0  -5 3943.85   32.10
  -2   0  -6    1.52    1.56
  -2   0  -6    3.17    1.82
  -2   0  -7 2122.96   28.19
  -2   0  -7 2068.21   30.21
  -2   0  -8  632.67   16.35
  -2   0  -8  652.39   18.31
  -2   0  -9  301.81   11.97
  -2   0  -9  326.50   14.00
  -2   0 -10  454.60   17.55
   2   0  10  442.82   17.33
   2   0  11  377.40   16.45
   2   0  12  230.99   12.73
   2   0  13  337.72   14.69
   2   0  14   -0.23    2.18
   2   0  15  291.29   10.53
   2   0  16  105.08    4.80
  -2  -1  18  115.91    5.59
  -2  -1  17    4.78    2.14
  -2  -1  16  799.57   20.59
  -2  -1  15   79.18    7.32
  -2  -1  14 3421.19   48.21
  -2  -1  13  100.32    8.56
  -2  -1  12  440.74   15.90
  -2  -1  12  468.96   17.86
  -2  -1  12  485.72   17.82
  -2  -1  11    8.84    3.28
  -2  -1  11   10.21    3.01
  -2  -1  10   96.16    6.88
  -2  -1   9  816.27   18.32
  -2  -1   8  118.53    6.58
  -2  -1   7   21.93    2.88
  -2  -1   6 1927.06   22.46
  -2  -1   5   12.47    1.99
  -2  -1   4   23.44    2.25
  -2  -1   3   17.07    1.79
  -2  -1   3   18.10    1.45
  -2  -1   2 1280.01    8.94
  -2  -1   2 1286.80   12.63
  -2  -1   1  628.28    8.21
  -2  -1   1  631.36    5.28
  -2  -1   0  226.51    4.83
  -2  -1  -1 2199.37   17.72
   2   1   1 2083.28    7.31
  -2  -1  -2    2.47    0.94
   2   1   2    2.42    0.53
  -2  -1  -3 2782.44   21.92
   2   1   3 2832.59   14.21
  -2  -1  -3 2789.11   24.96
  -2  -1  -4  792.61   14.85
  -2  -1  -4  794.99   12.98
  -2  -1  -5 2872.24   31.31
  -2  -1  -5 2835.24   26.88
  -2  -1  -6 2059.12   28.99
  -2  -1  -6 2071.58   25.47
  -2  -1  -7   93.05    5.83
  -2  -1  -7   83.23    6.39
  -2  -1  -8  594.45   18.07
   2   1   9   56.80    6.02
   2   1   9   65.81    6.51
  -2  -1  -9   66.82    6.62
   2   1  10  488.05   17.08
  -2  -1 -10  549.46   19.61
   2   1  10  504.61   18.68
   2   1  11 1341.05   27.82
   2   1  11 1369.35   31.00
   2   1  12  190.41   11.39
   2   1  12  182.27    9.84
   2   1  13  126.91    8.86
   2   1  14   19.68    3.34
   2   1  15  100.63    5.62
  -2  -2  18  218.22    7.95
  -2  -2  17   45.77    4.62
  -2  -2  16 1006.15   23.32
  -2  -2  15  974.30   24.87
  -2  -2  14  468.68   17.87
  -2  -2  13  752.79   22.75
  -2  -2  12  500.80   17.93
  -2  -2  12  514.99   18.31
  -2  -2  12  473.52   17.04
  -2  -2  11  459.27   15.94
  -2  -2  10  100.23    7.05
  -2  -2   9   15.13    3.07
  -2  -2   8  201.28    8.89
  -2  -2   7 1059.37   18.80
  -2  -2   6   13.32    2.44
  -2  -2   5  106.14    5.14
  -2  -2   4   46.46    3.23
  -2  -2   3  198.11    5.87
  -2  -2   3  205.10    3.92
  -2  -2   2 5071.54   26.82
  -2  -2   2 4825.47   10.98
  -2  -2   1 3361.68   20.52
  -2  -2   0  176.26    4.53
  -2  -2  -1 3490.91   25.06
   2   2   1 3507.45   18.71
  -2  -2  -2 1001.32   12.15
   2   2   2 1025.24   10.43
  -2  -2  -3 1370.90   15.40
  -2  -2  -3 1402.28   19.01
   2   2   3 1372.58   12.87
  -2  -2  -4  842.55   13.28
  -2  -2  -4  856.99   16.31
   2   2   4  833.74   10.70
  -2  -2  -5    8.00    2.16
  -2  -2  -5    4.29    1.22
  -2  -2  -6 2966.04   29.72
  -2  -2  -6 2852.92   35.98
  -2  -2  -7  585.20   17.45
  -2  -2  -8  229.34   11.72
   2   2   9  228.40   12.42
  -2  -2  -9  231.57   12.35
   2   2   9  223.23   11.85
   2   2  10   82.61    7.31
   2   2  10   84.89    7.88
   2   2  11  230.39   12.54
   2   2  11  219.09   11.47
   2   2  12  253.18   12.54
   2   2  12  241.14   11.30
   2   2  13    4.90    2.12
   2   2  14  277.50    9.96
  -2  -3  18  213.27    7.86
  -2  -3  17  118.74    7.17
  -2  -3  16  352.94   13.82
  -2  -3  15  835.50   22.80
   2   3 -15  850.41   20.49
   2   3 -14   86.34    7.33
  -2  -3  14   85.50    7.95
   2   3 -13  505.46   17.54
  -2  -3  13  568.00   19.49
   2   3 -12  180.70   10.47
  -2  -3  12  179.74   10.76
  -2  -3  12  179.55   10.93
  -2  -3  11  100.66    7.86
  -2  -3  10  333.14   13.37
  -2  -3   9  272.84   11.38
  -2  -3   8   87.33    6.18
  -2  -3   7  689.25   15.88
  -2  -3   6    7.09    2.19
  -2  -3   5   47.90    3.83
  -2  -3   4  366.37    9.24
  -2  -3   3 1521.44    7.33
  -2  -3   3 1590.63   17.49
  -2  -3   2  116.96    4.41
  -2  -3   1 3178.60   20.99
  -2  -3   0  915.00   10.71
   2   3   0  894.59   10.43
  -2  -3  -1 1603.11   18.80
   2   3   1 1634.80   13.58
   2   3   1 1638.06   15.81
  -2  -3  -2 2794.12   20.74
  -2  -3  -2 2813.56   27.08
   2   3   2 2815.35   21.12
   2   3   3  559.87    9.83
  -2  -3  -3  528.12   12.70
  -2  -3  -3  553.43    9.87
  -2  -3  -4  374.27    8.73
  -2  -3  -4  371.48   11.60
  -2  -3  -5 1240.89   22.93
  -2  -3  -6   70.92    6.18
  -2  -3  -7  782.44   21.08
  -2  -3  -8   12.65    3.34
   2   3   8    5.08    2.33
   2   3   8    9.43    2.84
   2   3   9  873.21   24.15
   2   3   9  916.42   24.55
   2   3  10 1009.41   25.96
   2   3  10  993.27   25.41
   2   3  11   47.08    5.88
   2   3  11   40.96    5.15
   2   3  12   13.29    2.87
   2   3  12   14.37    3.29
   2   3  13    4.46    1.79
   2   3  14   31.84    2.92
  -2  -4  18  131.59    5.96
  -2  -4  17  989.95   19.86
   2   4 -16    5.71    2.05
  -2  -4  16    2.18    2.06
   2   4 -15   29.71    4.22
  -2  -4  15   28.99    4.59
   2   4 -14  347.70   14.66
  -2  -4  14  355.26   15.23
  -2  -4  13   23.04    4.64
   2   4 -13   28.16    4.72
  -2  -4  12  901.19   23.73
  -2  -4  12  899.86   24.85
   2   4 -12  889.72   23.62
  -2  -4  11  136.54    9.52
  -2  -4  10    2.42    1.70
  -2  -4   9   40.57    4.75
  -2  -4   8   41.22    4.63
  -2  -4   7   25.66    3.54
  -2  -4   6  116.29    6.47
  -2  -4   5  249.88    8.75
  -2  -4   4    0.74    1.24
  -2  -4   3  155.83    5.83
  -2  -4   2 6602.45   34.76
  -2  -4   1  512.14    8.88
   2   4  -1  491.52    9.34
   2   4   0  853.42   11.97
  -2  -4   0  840.13   10.70
   2   4   1   22.55    1.99
  -2  -4  -1   21.12    2.57
  -2  -4  -2 3596.90   33.47
  -2  -4  -2 3638.10   23.48
   2   4   2 3568.16   28.14
  -2  -4  -3 1585.19   23.57
   2   4   3 1630.61   19.45
  -2  -4  -4   22.53    3.25
  -2  -4  -5  757.82   19.10
  -2  -4  -6  278.59   12.55
   2   4   7  233.88   12.21
  -2  -4  -7  237.92   12.08
   2   4   8 1057.66   26.02
  -2  -4  -8 1090.17   27.13
   2   4   8 1007.56   26.01
   2   4   9    9.86    3.23
   2   4   9    3.78    2.93
   2   4  10  153.77   10.13
   2   4  10  147.73    9.66
   2   4  11    9.04    3.08
   2   4  11   11.14    2.78
   2   4  12    2.81    1.59
   2   4  12   -0.12    0.98
   2   4  13    5.57    1.76
   2   4  14  193.39    6.50
  -2  -5  18  103.82    4.85
   2   5 -17  802.54   16.08
  -2  -5  17  781.11   16.68
  -2  -5  16  160.23    8.88
   2   5 -16  162.77    8.84
  -2  -5  15   23.67    3.98
   2   5 -15   18.44    3.73
  -2  -5  14   25.69    4.50
   2   5 -14   26.99    4.74
   2   5 -13  199.99   11.82
  -2  -5  13  207.75   11.64
   2   5 -12   27.76    5.02
  -2  -5  12   37.51    5.71
  -2  -5  12   27.93    4.71
  -2  -5  11  681.55   21.47
   2   5 -11  694.54   21.25
  -2  -5  10   59.03    6.30
  -2  -5   9    6.22    2.03
  -2  -5   8    3.63    2.04
  -2  -5   7  388.63   13.09
  -2  -5   6  879.34   18.49
  -2  -5   5 2059.75   26.09
  -2  -5   4   56.33    4.11
  -2  -5   3   13.55    2.00
  -2  -5   2 1971.93   19.68
   2   5  -2 1849.80   21.24
  -2  -5   1 2712.78   21.02
   2   5  -1 2590.89   24.18
  -2  -5   0 1870.10   23.19
   2   5   0 1913.16   20.34
   2   5   1 2162.37   21.50
  -2  -5  -1 2171.94   26.34
  -2  -5  -2  177.87    8.13
  -2  -5  -3 1382.03   23.83
   2   5   3 1359.59   20.20
  -2  -5  -4  438.32   14.32
  -2  -5  -5   64.79    5.88
  -2  -5  -6  390.91   15.42
   2   5   6  392.82   15.84
  -2  -5  -7   58.85    6.56
   2   5   7   54.43    6.30
   2   5   8  444.44   17.70
   2   5   9  402.05   16.53
   2   5  10   22.28    4.20
   2   5  11   13.63    3.08
   2   5  11   14.34    3.41
   2   5  12    6.69    2.24
   2   5  13   51.95    3.85
   2   6 -17    5.39    1.79
  -2  -6  17    3.63    1.58
  -2  -6  16   38.60    4.33
   2   6 -16   39.08    4.68
  -2  -6  15  118.69    7.91
   2   6 -15  109.11    8.14
  -2  -6  14   19.75    3.96
   2   6 -14   22.88    4.23
   2   6 -13    3.32    2.67
   2   6 -12  321.78   15.04
   2   6 -11    9.25    3.21
  -2  -6  11   10.13    3.44
  -2  -6  10  301.79   14.31
  -2  -6   9  108.62    8.34
  -2  -6   8  542.08   17.27
  -2  -6   7   11.91    2.96
  -2  -6   6 2830.77   34.65
  -2  -6   5  192.81    8.34
  -2  -6   4 2541.02   27.77
   2   6  -3   62.30    4.65
  -2  -6   3   59.66    3.98
   2   6  -2  208.77    7.99
   2   6  -1  385.08   10.47
  -2  -6   1  370.97   10.93
   2   6   0   -0.29    0.97
  -2  -6   0    0.15    0.97
   2   6   1 1607.89   20.96
  -2  -6  -1 1647.18   25.00
  -2  -6  -2 2588.03   32.77
  -2  -6  -3   61.58    5.44
  -2  -6  -4   40.25    4.75
   2   6   5   54.81    5.72
   2   6   5   57.83    6.35
  -2  -6  -5   62.62    6.27
   2   6   6  441.54   15.47
   2   6   6  449.09   17.47
  -2  -6  -6  446.13   16.79
   2   6   7  938.85   25.60
   2   6   8    1.87    2.33
   2   6   9    9.20    3.00
   2   6   9   19.29    4.56
   2   6  10   -0.02    2.22
   2   6  10    3.96    2.42
   2   6  11    5.77    2.36
   2   6  12    0.89    1.33
   2   7 -17  187.11    7.87
   2   7 -16  145.29    8.27
   2   7 -15   49.93    5.64
   2   7 -14  136.63    9.68
   2   7 -13  142.69    8.78
   2   7 -13  134.92    9.97
   2   7 -12  231.92   12.82
   2   7 -12  224.28   11.65
   2   7 -12  224.19   12.81
   2   7 -11  591.16   20.32
  -2  -7  11  666.15   22.56
  -2  -7  10   -1.46    2.30
   2   7 -10    0.85    1.45
  -2  -7   9   60.25    6.54
  -2  -7   8   60.12    6.27
  -2  -7   7  362.48   13.70
  -2  -7   6 1075.41   21.96
  -2  -7   5 2159.59   28.89
   2   7  -4  384.85   12.99
   2   7  -3 2423.04   30.64
  -2  -7   2   22.76    3.14
   2   7  -2   24.68    3.21
   2   7  -1  326.93   10.68
  -2  -7   1  339.86   11.24
  -2  -7   0  137.00    7.54
   2   7   0  137.07    6.90
  -2  -7  -1  229.44   10.10
  -2  -7  -2 1002.57   21.96
   2   7   3  243.53   12.07
   2   7   3  249.33   12.05
  -2  -7  -3  246.47   11.49
   2   7   4  776.39   21.63
  -2  -7  -4  770.98   21.06
   2   7   4  772.60   22.01
   2   7   4  804.19   26.97
   2   7   5  556.04   18.40
   2   7   5  535.36   18.82
   2   7   5  555.60   23.25
   2   7   6  106.26    7.92
   2   7   6   95.84    8.29
   2   7   6   84.27    9.48
   2   7   7   93.67    8.01
   2   7   7   89.90    9.52
   2   7   8   83.80    7.44
   2   7   8   70.59    8.16
   2   7   9   35.08    5.35
   2   7   9   38.50    4.87
   2   7  10    4.36    2.33
   2   7  11   74.17    5.02
   2   8 -17    1.23    1.40
   2   8 -16  191.92    9.12
   2   8 -15  151.42    9.20
   2   8 -14  173.90    9.02
   2   8 -14  176.23   10.74
   2   8 -13    4.75    2.74
   2   8 -13    2.97    2.63
   2   8 -12   -1.57    2.46
   2   8 -12    4.14    2.68
   2   8 -12    6.68    3.29
   2   8 -11   13.47    3.55
   2   8 -10   85.33    7.88
  -2  -8  10   93.13    8.61
   2   8  -9  642.71   20.61
  -2  -8   9  664.85   21.31
   2   8  -9  663.54   21.82
   2   8  -8 1132.12   26.99
  -2  -8   8 1173.41   26.91
  -2  -8   7  653.82   18.91
   2   8  -6    1.68    2.61
   2   8  -5  894.55   22.35
   2   8  -4  660.60   18.20
   2   8  -3  566.27   16.19
  -2  -8   3  597.55   15.70
   2   8  -2  178.34    8.81
  -2  -8   2  184.90    8.83
   2   8  -1   21.51    3.15
   2   8   0  435.95   15.89
   2   8   0  476.43   17.76
   2   8   1 1417.93   32.06
   2   8   1 1209.96   27.29
   2   8   2   55.17    6.18
   2   8   2   47.22    6.61
   2   8   3 1027.96   30.09
   2   8   3 1027.32   25.86
   2   8   3  971.09   24.29
   2   8   4   38.32    5.38
   2   8   4   40.21    5.17
   2   8   4   35.69    6.37
   2   8   5  596.33   19.23
   2   8   5  589.43   23.66
   2   8   5  567.93   19.21
   2   8   6    5.21    2.53
   2   8   6    2.06    2.21
   2   8   7   44.46    5.65
   2   8   7   42.26    5.94
   2   8   8  191.09   11.37
   2   8   9   84.68    6.73
   2   8  10   27.31    3.10
   2   9 -17   54.04    3.68
   2   9 -16   66.83    5.15
   2   9 -15    3.60    2.16
   2   9 -14    3.94    1.98
   2   9 -14    4.35    2.66
   2   9 -13   85.05    6.93
   2   9 -13   93.16    8.12
   2   9 -12  808.76   22.93
   2   9 -12  819.10   24.36
   2   9 -12  822.19   22.68
   2   9 -11  313.49   14.68
   2   9 -11  339.53   16.16
   2   9 -10  178.38   11.16
   2   9  -9  658.96   22.07
   2   9  -9  653.80   21.21
   2   9  -8  184.62   11.28
   2   9  -8  196.09   11.88
   2   9  -8  176.78   12.44
   2   9  -7  767.33   22.42
   2   9  -7  716.88   21.74
   2   9  -7  732.28   23.89
   2   9  -6   19.75    3.98
   2   9  -6   18.79    3.80
   2   9  -6   19.46    4.43
   2   9  -5  167.45   10.50
   2   9  -5  202.11   11.24
   2   9  -4  934.31   23.03
   2   9  -4  877.96   21.74
   2   9  -3  154.50    9.08
   2   9  -3  153.05    9.46
   2   9  -3  164.98   10.20
   2   9  -2 1147.93   23.74
   2   9  -2 1213.26   26.93
   2   9  -2 1191.21   26.79
   2   9  -1  730.50   21.43
   2   9  -1  787.34   23.23
   2   9  -1  757.03   22.16
   2   9   0   10.00    3.53
   2   9   0    5.77    3.15
   2   9   0    5.60    3.07
   2   9   1  876.32   24.44
   2   9   1  967.17   27.90
   2   9   2    3.79    3.13
   2   9   2    6.34    3.78
   2   9   3    1.97    3.25
   2   9   3    8.71    3.40
   2   9   4   91.82    7.95
   2   9   4   88.87    9.41
   2   9   5   15.34    4.30
   2   9   6    9.55    3.48
   2   9   7   11.17    3.32
   2   9   8  256.65   10.90
   2   9   9   20.85    2.68
   2  10 -16   57.50    4.24
   2  10 -15  141.42    6.09
   2  10 -15  155.14    7.98
   2  10 -14  109.82    6.72
   2  10 -14  112.70    7.81
   2  10 -13   59.46    6.29
   2  10 -13   62.20    5.93
   2  10 -12   10.74    3.59
   2  10 -12   11.61    3.34
   2  10 -12   15.88    3.88
   2  10 -11  686.80   21.54
   2  10 -11  708.82   21.26
   2  10 -11  703.51   22.73
   2  10 -10   32.50    4.85
   2  10 -10   29.06    4.80
   2  10  -9  396.89   16.51
   2  10  -9  399.71   17.83
   2  10  -9  412.47   17.60
   2  10  -8  105.62    8.90
   2  10  -8  102.76    8.77
   2  10  -7  104.23    8.59
   2  10  -7   93.59    8.48
   2  10  -6  598.35   20.18
   2  10  -5  136.29    9.71
   2  10  -4  238.60   11.79
   2  10  -4  248.96   13.09
   2  10  -3  727.55   21.17
   2  10  -3  739.11   22.57
   2  10  -3  747.33   21.74
   2  10  -2  111.00    8.76
   2  10  -2  107.30    9.05
   2  10  -2   96.11    8.05
   2  10  -1  430.12   17.37
   2  10  -1  469.27   18.74
   2  10  -1  477.21   18.32
   2  10   0  155.50   10.68
   2  10   0  186.70   12.35
   2  10   1   29.94    5.08
   2  10   1   21.55    4.93
   2  10   2   29.10    5.10
   2  10   2   29.18    5.52
   2  10   3   45.38    5.73
   2  10   3   46.04    6.57
   2  10   4  210.29   13.22
   2  10   5  234.61   12.82
   2  10   6    5.58    2.81
   2  10   7   69.35    5.49
   2  10   8   23.54    2.51
   2  11 -15    0.06    1.07
   2  11 -15    1.42    0.79
   2  11 -14    0.07    1.25
   2  11 -14    0.64    1.57
   2  11 -13   76.67    5.98
   2  11 -13   75.28    6.28
   2  11 -12  450.25   15.67
   2  11 -12  459.60   16.32
   2  11 -11  118.49    9.02
   2  11 -11  140.92    9.68
   2  11 -11  126.12    8.53
   2  11 -10  526.56   19.47
   2  11 -10  539.47   18.05
   2  11 -10  525.05   18.86
   2  11  -9  271.31   14.23
   2  11  -9  273.73   13.32
   2  11  -8  724.44   22.68
   2  11  -7  151.23   10.49
   2  11  -6    2.43    2.18
   2  11  -5  256.88   13.47
   2  11  -4  118.50    9.35
   2  11  -3  317.20   14.49
   2  11  -3  305.02   14.81
   2  11  -2  506.39   19.31
   2  11  -1  165.23   10.77
   2  11  -1  153.87   11.15
   2  11   0  250.03   13.22
   2  11   0  260.09   14.35
   2  11   1   65.00    7.56
   2  11   2   10.15    3.64
   2  11   3   17.94    4.20
   2  11   4   90.25    7.52
   2  11   5    2.00    2.01
   2  11   6   61.66    4.67
   2  12 -14   67.69    4.04
   2  12 -13   20.63    3.01
   2  12 -13   25.16    3.19
   2  12 -12  231.93   10.40
   2  12 -12  208.19    9.19
   2  12 -11   23.65    4.04
   2  12 -10  348.09   15.09
   2  12  -9  229.32   13.14
   2  12  -8   19.92    4.56
   2  12  -8   16.11    4.29
   2  12  -7  505.80   18.38
   2  12  -6  104.14    8.98
   2  12  -5  201.19   11.99
   2  12  -4  378.57   16.31
   2  12  -3   47.30    6.48
   2  12  -2  929.80   25.48
   2  12  -1   31.07    5.02
   2  12   0   22.17    4.45
   2  12   1   21.82    4.21
   2  12   2    5.32    2.60
   2  12   3   14.27    3.25
   2  12   4  248.72    9.51
   2  13 -13    0.89    1.00
   2  13 -12  100.98    5.93
   2  13 -11    5.88    2.39
   2  13 -10    0.33    1.91
   2  13  -9  346.49   14.42
   2  13  -8  340.62   14.80
   2  13  -7   39.87    5.63
   2  13  -7   44.54    5.52
   2  13  -6  210.36   11.69
   2  13  -6  237.31   12.25
   2  13  -5   61.36    6.02
   2  13  -5   70.97    7.17
   2  13  -4  295.61   13.56
   2  13  -3  153.96    9.80
   2  13  -2   86.06    7.42
   2  13  -1   25.70    4.58
   2  13   0    5.05    2.96
   2  13   1   36.85    4.34
   2  13   2    8.69    2.21
   2  14 -10  507.47   12.66
   2  14  -9   28.03    3.61
   2  14  -8  551.08   14.69
   2  14  -7    2.22    1.16
   2  14  -6  570.87   16.59
   2  14  -5   25.24    3.97
   2  14  -4   43.61    4.84
   2  14  -3   12.45    3.15
   2  14  -2   35.93    4.13
   2  14  -1   41.81    4.10
  -3  15  -3    8.79    2.96
  -3  15  -4  110.10    7.48
  -3  15  -5    3.33    2.17
  -3  15  -6    5.23    1.95
  -3  15  -7  120.21    6.56
  -3  14   4   29.84    3.23
  -3  14   3  198.65    8.83
  -3  14   2    7.25    2.61
  -3  14   1   14.00    3.09
  -3  14   0   59.74    5.61
  -3  14  -1   65.49    5.51
  -3  14  -1   54.94    6.16
  -3  14  -2  204.52   11.25
  -3  14  -3  331.13   14.37
  -3  14  -4    6.73    3.59
  -3  14  -5  210.16   11.52
  -3  14  -6   19.03    3.99
  -3  14  -6   15.63    3.02
  -3  14  -7  325.22   12.44
  -3  14  -7  303.64   12.84
  -3  14  -8  249.82   10.49
  -3  14  -8  215.57   10.10
  -3  14  -9   59.73    4.98
  -3  14  -9   56.95    4.81
  -3  14 -10  574.11   13.09
  -3  13   6  110.86    5.66
  -3  13   5    0.34    1.70
  -3  13   4    3.84    2.45
  -3  13   3   91.79    7.49
  -3  13   2   70.96    6.93
  -3  13   1   94.01    7.97
  -3  13   1   93.82    7.99
  -3  13   0   22.08    4.30
  -3  13   0   19.96    3.83
  -3  13   0   18.47    3.76
  -3  13  -1    0.08    1.80
  -3  13  -1   -3.02    2.40
  -3  13  -2    1.12    1.92
  -3  13  -2    6.40    1.90
  -3  13  -2    7.04    3.32
  -3  13  -3  518.95   17.89
  -3  13  -3  468.77   17.96
  -3  13  -4  146.05    9.94
  -3  13  -4  136.59    8.81
  -3  13  -5  552.91   18.49
  -3  13  -6  418.49   16.33
  -3  13  -7  439.02   16.62
  -3  13  -8  463.13   16.50
  -3  13  -9    1.86    1.94
  -3  13 -10   38.50    4.53
  -3  13 -11  100.56    6.02
  -3  13 -12   10.10    1.81
  -3  12   8  200.80    6.47
  -3  12   7   61.23    4.60
  -3  12   6  232.11   10.16
  -3  12   5   31.75    4.51
  -3  12   4    8.47    3.38
  -3  12   3   31.32    5.03
  -3  12   2   47.70    6.25
  -3  12   2   57.97    6.10
  -3  12   2   50.03    6.27
  -3  12   1   58.31    6.83
  -3  12   1   60.69    6.98
  -3  12   1   58.94    6.21
  -3  12   0   24.48    4.60
  -3  12   0   27.06    4.70
  -3  12   0   28.63    4.68
  -3  12  -1  302.82   13.73
  -3  12  -1  300.62   13.91
  -3  12  -1  283.90   14.01
  -3  12  -2   83.32    6.85
  -3  12  -2   80.91    7.41
  -3  12  -2   79.91    7.90
  -3  12  -3   10.51    3.22
  -3  12  -3    9.38    3.16
  -3  12  -4  592.98   20.08
  -3  12  -4  604.86   19.94
  -3  12  -4  577.23   19.57
  -3  12  -5   36.38    5.60
  -3  12  -6  946.13   26.31
  -3  12  -7   37.95    5.68
  -3  12  -8  413.23   16.66
  -3  12  -9  161.68   10.18
  -3  12 -10   27.37    4.45
  -3  12 -10   24.56    3.74
  -3  12 -11   45.83    4.82
  -3  12 -12  302.25   10.17
  -3  12 -13   28.84    2.63
  -3  11   9    4.01    1.34
  -3  11   8   82.53    5.54
  -3  11   7  415.24   13.91
  -3  11   6   70.28    6.70
  -3  11   5    4.65    3.03
  -3  11   5    0.10    0.63
  -3  11   4   22.83    4.41
  -3  11   4   29.36    4.49
  -3  11   3    5.58    2.90
  -3  11   3    9.44    3.18
  -3  11   2   13.00    3.33
  -3  11   2    5.64    3.15
  -3  11   2   13.45    4.31
  -3  11   1  234.73   13.32
  -3  11   1  261.03   13.02
  -3  11   1  255.34   13.31
  -3  11   0  186.75   11.34
  -3  11   0  187.54   11.59
  -3  11   0  191.26   11.13
  -3  11   0  193.97   11.68
  -3  11  -1  388.52   15.73
  -3  11  -1  401.49   15.94
  -3  11  -1  389.12   16.41
  -3  11  -2  570.99   17.81
  -3  11  -2  555.72   18.69
  -3  11  -2  518.52   18.99
  -3  11  -3  309.29   14.55
  -3  11  -3  312.36   14.08
  -3  11  -3  298.22   14.46
  -3  11  -4  335.16   15.60
  -3  11  -4  354.00   15.27
  -3  11  -4  360.19   15.50
  -3  11  -5  676.31   21.56
  -3  11  -5  652.44   22.12
  -3  11  -6  892.99   26.17
  -3  11  -7 1311.88   31.51
  -3  11  -8   43.16    5.93
  -3  11  -8   43.81    5.28
  -3  11  -9   50.83    6.27
  -3  11  -9   50.99    5.76
  -3  11 -10    6.45    2.94
  -3  11 -10   13.16    3.25
  -3  11 -11   98.62    7.46
  -3  11 -11   99.31    7.50
  -3  11 -12  340.45   11.98
  -3  11 -12  336.27   12.46
  -3  11 -13  274.84    9.06
  -3  10  11   12.56    1.78
  -3  10  10    6.17    1.89
  -3  10   9    6.48    1.93
  -3  10   9    4.49    1.71
  -3  10   8   46.14    5.12
  -3  10   8   45.76    4.90
  -3  10   7   38.92    5.10
  -3  10   7   34.88    4.70
  -3  10   7   41.33    4.94
  -3  10   6   69.64    7.03
  -3  10   6   68.15    6.85
  -3  10   5   11.02    3.54
  -3  10   5    8.66    2.93
  -3  10   4   20.70    4.14
  -3  10   4   15.92    3.49
  -3  10   4   22.07    4.68
  -3  10   3   68.57    7.61
  -3  10   3   76.02    7.37
  -3  10   2  325.03   15.74
  -3  10   2  352.53   15.15
  -3  10   2  353.85   15.65
  -3  10   1    7.61    2.84
  -3  10   1   10.65    3.02
  -3  10   1    8.62    2.99
  -3  10   0 1771.20   33.93
  -3  10   0 1684.61   33.49
  -3  10  -1   18.87    4.27
  -3  10  -1   28.43    4.28
  -3  10  -1   22.24    3.90
  -3  10  -2  920.61   23.90
  -3  10  -2  871.93   22.27
  -3  10  -2  879.68   23.85
  -3  10  -3  287.67   13.82
  -3  10  -3  280.21   13.47
  -3  10  -3  274.28   12.69
  -3  10  -3  250.98   13.04
  -3  10  -4  109.68    9.05
  -3  10  -4  113.92    8.73
  -3  10  -4  114.48    8.45
  -3  10  -4  105.20    8.27
  -3  10  -5 1261.48   29.01
  -3  10  -5 1282.24   30.53
  -3  10  -5 1174.34   27.89
  -3  10  -5 1182.50   28.11
  -3  10  -6  131.72   10.17
  -3  10  -7  248.41   12.79
  -3  10  -7  229.22   13.15
  -3  10  -7  214.33   14.09
  -3  10  -8   48.20    6.28
  -3  10  -8   40.29    7.07
  -3  10  -8   38.70    5.50
  -3  10  -9   35.27    5.41
  -3  10  -9   37.19    6.71
  -3  10  -9   41.53    5.77
  -3  10 -10  440.16   17.03
  -3  10 -10  426.56   19.68
  -3  10 -10  445.87   17.40
  -3  10 -11   54.82    6.11
  -3  10 -11   51.60    6.07
  -3  10 -11   49.40    7.13
  -3  10 -12    0.60    1.90
  -3  10 -12   -2.11    2.36
  -3  10 -12   -1.49    2.01
  -3  10 -13  149.58    7.38
  -3  10 -13  167.03    9.01
  -3  10 -13  154.32    8.46
  -3  10 -14    4.63    1.17
  -3   9  12    0.64    1.20
  -3   9  11   78.36    5.52
  -3   9  10    7.91    1.56
  -3   9  10    3.18    2.10
  -3   9   9   53.87    5.01
  -3   9   9   66.52    6.34
  -3   9   9   75.04    6.74
  -3   9   8  258.29   11.85
  -3   9   8  267.35   13.01
  -3   9   8  240.41   12.94
  -3   9   7  112.14    9.26
  -3   9   7  122.78    9.30
  -3   9   7  114.78    8.70
  -3   9   6    6.10    2.76
  -3   9   6    1.89    2.32
  -3   9   6    9.87    2.89
  -3   9   5   84.44    7.92
  -3   9   5   79.09    7.88
  -3   9   4  275.30   14.32
  -3   9   4  291.72   15.51
  -3   9   4  289.90   13.89
  -3   9   3    6.12    2.68
  -3   9   3    9.86    3.16
  -3   9   3    8.72    3.36
  -3   9   3   11.24    2.96
  -3   9   2  711.65   20.74
  -3   9   2  693.55   21.69
  -3   9   2  761.75   22.92
  -3   9   2  714.13   20.22
  -3   9   1  600.72   19.46
  -3   9   1  546.26   17.82
  -3   9   0  931.55   22.16
  -3   9   0  946.54   23.28
  -3   9  -1 1545.15   28.63
  -3   9  -2  230.12   11.25
  -3   9  -3  560.05   17.44
  -3   9  -4    5.91    2.01
  -3   9  -4    5.55    2.70
  -3   9  -5  234.44   12.64
  -3   9  -5  223.51   11.66
  -3   9  -5  222.13   11.91
  -3   9  -5  250.30   13.63
  -3   9  -6  843.91   24.39
  -3   9  -6  807.80   22.19
  -3   9  -6  828.40   22.66
  -3   9  -6  804.60   25.55
  -3   9  -7  209.62   12.39
  -3   9  -7  183.56   12.98
  -3   9  -7  163.73   10.23
  -3   9  -7  189.24   11.38
  -3   9  -8  286.90   14.57
  -3   9  -8  262.06   13.68
  -3   9  -8  249.08   15.76
  -3   9  -9  111.36    9.16
  -3   9  -9  123.24    9.67
  -3   9  -9  108.70   10.83
  -3   9 -10  417.10   20.36
  -3   9 -10  460.47   17.66
  -3   9 -10  460.43   18.18
  -3   9 -11  240.42   12.17
  -3   9 -11  247.32   12.99
  -3   9 -11  231.22   14.55
  -3   9 -12  318.31   12.79
  -3   9 -12  333.83   15.88
  -3   9 -12  327.53   14.18
  -3   9 -13   91.68    6.14
  -3   9 -13   99.78    7.75
  -3   9 -13  100.53    7.34
  -3   9 -14   54.95    4.98
  -3   9 -14   60.92    5.06
  -3   8  13  210.14    7.55
  -3   8  12   53.87    4.82
  -3   8  11  180.70    9.56
  -3   8  10   39.34    4.14
  -3   8  10   47.80    5.70
  -3   8   9    0.76    1.62
  -3   8   9    4.72    2.38
  -3   8   9    3.52    1.87
  -3   8   8   80.88    8.02
  -3   8   8   84.91    7.77
  -3   8   8   87.92    7.28
  -3   8   7  132.00    9.58
  -3   8   7  126.32    9.12
  -3   8   6  589.40   21.93
  -3   8   6  620.66   20.28
  -3   8   6  593.91   19.92
  -3   8   5   19.05    3.87
  -3   8   5   21.99    4.33
  -3   8   5   21.14    3.72
  -3   8   5   15.66    4.24
  -3   8   4  334.83   14.31
  -3   8   4  361.37   15.43
  -3   8   4  355.90   15.91
  -3   8   3  112.98    8.83
  -3   8   2  332.46   11.69
  -3   8   2  331.53   13.84
  -3   8   1 1634.32   27.54
  -3   8   1 1675.44   24.97
  -3   8   1 1678.27   29.39
  -3   8   0  133.08    7.84
  -3   8   0  134.21    6.96
  -3   8   0  130.88    8.04
  -3   8  -1  887.86   19.72
  -3   8  -1  936.69   18.08
  -3   8  -1  910.37   19.92
  -3   8  -2  451.02   14.18
  -3   8  -3 1152.74   23.00
  -3   8  -4 1022.00   22.16
   3  -8   5    5.93    1.99
  -3   8  -5   11.68    3.01
  -3   8  -6   77.37    6.57
   3  -8   6   97.53    8.33
  -3   8  -7  489.25   18.28
  -3   8  -7  462.25   15.86
  -3   8  -7  502.13   18.18
  -3   8  -7  474.79   20.40
  -3   8  -8   60.95    6.73
  -3   8  -8   55.48    6.53
   3  -8   8   63.47    7.24
  -3   8  -8   57.96    7.44
  -3   8  -9 1286.56   29.74
  -3   8  -9 1255.00   30.19
  -3   8 -10    4.15    3.32
  -3   8 -10   11.41    3.38
  -3   8 -10    5.67    2.93
  -3   8 -11    5.62    2.89
  -3   8 -11   10.88    3.66
  -3   8 -11    3.82    3.49
  -3   8 -12   44.21    5.16
  -3   8 -12   43.09    5.53
  -3   8 -12   40.09    6.17
  -3   8 -13   22.56    3.30
  -3   8 -13   27.03    4.38
  -3   8 -13   28.33    4.82
  -3   8 -14    1.15    2.01
  -3   8 -14    0.63    1.50
  -3   8 -15  390.73   10.47
  -3   7  14  128.28    5.83
  -3   7  13   22.08    3.29
  -3   7  12  411.39   13.63
  -3   7  12  411.84   14.40
  -3   7  11   10.53    3.21
  -3   7  11    9.42    2.80
  -3   7  10    8.62    2.82
  -3   7  10   10.00    3.38
  -3   7   9    5.51    2.89
  -3   7   9    4.50    2.20
  -3   7   9   10.45    3.45
  -3   7   8  175.29   10.32
  -3   7   8  172.10   11.00
  -3   7   7  155.12    9.74
  -3   7   7  151.99   10.14
  -3   7   7  135.77   10.35
  -3   7   6  168.43   10.85
  -3   7   6  184.85   10.63
  -3   7   5  563.74   18.18
  -3   7   4  332.90   12.92
  -3   7   3 1632.62   26.28
  -3   7   3 1696.06   29.86
  -3   7   2  299.10   10.44
  -3   7   2  308.25   12.16
  -3   7   1  892.94   18.37
  -3   7   1  886.23   16.99
  -3   7   1  864.50   19.06
  -3   7   0 1641.50   24.42
  -3   7   0 1615.56   22.35
  -3   7   0 1604.16   24.68
  -3   7  -1  431.14   12.38
  -3   7  -1  429.81   12.50
  -3   7  -1  419.10   11.31
  -3   7  -2 1986.25   27.04
  -3   7  -3  271.71   10.22
  -3   7  -3  273.18   10.19
  -3   7  -4  752.14   18.42
  -3   7  -4  745.41   17.12
  -3   7  -5  195.35   10.13
  -3   7  -5  196.77    9.16
  -3   7  -6   14.69    3.00
  -3   7  -6   11.79    2.84
  -3   7  -7  165.62    8.83
  -3   7  -7  169.96   10.42
  -3   7  -8  252.98   12.93
  -3   7  -8  252.29   13.05
  -3   7  -8  256.81   13.32
  -3   7  -9  248.51   12.78
   3  -7   9  251.93   14.31
  -3   7  -9  251.22   13.42
  -3   7 -10  149.05    9.98
  -3   7 -10  143.72   10.48
  -3   7 -11    5.32    2.53
  -3   7 -11   11.21    3.45
  -3   7 -12  317.05   14.62
  -3   7 -12  317.82   13.05
  -3   7 -13   44.46    6.08
  -3   7 -13   38.15    5.01
  -3   7 -14  278.98   11.49
  -3   7 -14  289.91   12.40
  -3   7 -15   92.35    5.71
  -3   6  15   33.12    2.82
  -3   6  14   25.19    3.20
  -3   6  13  139.98    8.30
  -3   6  13  144.23    8.03
  -3   6  12   33.86    4.57
  -3   6  12   35.78    5.03
  -3   6  11  328.77   14.73
  -3   6  10    5.85    2.79
  -3   6   9    1.29    1.07
  -3   6   9   -0.54    2.32
  -3   6   9    1.92    2.51
  -3   6   8   22.59    4.48
  -3   6   8   36.58    4.83
  -3   6   8   32.37    4.64
  -3   6   7 1864.64   36.86
  -3   6   6    7.43    2.80
  -3   6   5 1402.86   26.98
  -3   6   4   53.21    4.93
  -3   6   3 2687.69   31.32
  -3   6   2 1076.65   18.55
  -3   6   1    4.79    1.71
  -3   6   1    4.05    1.58
  -3   6   1    4.72    1.90
  -3   6   0  757.96   14.30
  -3   6   0  779.68   15.18
  -3   6   0  777.11   15.30
  -3   6  -1  307.87    9.54
  -3   6  -1  301.71    8.51
  -3   6  -1  316.96    9.43
  -3   6  -1  296.33    9.00
  -3   6  -2 1031.63   17.46
  -3   6  -2 1013.46   17.01
  -3   6  -3 2521.60   27.66
  -3   6  -3 2509.04   29.91
  -3   6  -4   44.72    4.58
  -3   6  -4   40.88    3.79
  -3   6  -5  499.76   13.09
  -3   6  -5  503.32   15.31
  -3   6  -6  286.37   10.25
  -3   6  -6  301.06   12.57
  -3   6  -7   89.24    7.30
  -3   6  -8  142.79    9.52
  -3   6  -9   66.68    6.70
  -3   6  -9   58.67    6.54
  -3   6  -9   61.17    6.54
  -3   6 -10   24.09    3.93
  -3   6 -10   23.18    4.49
  -3   6 -11    5.62    2.72
  -3   6 -11    6.97    2.85
   3  -6  12   54.30    6.08
  -3   6 -12   52.45    6.32
   3  -6  13   44.09    5.02
  -3   6 -13   61.08    6.35
   3  -6  14  489.21   14.17
  -3   6 -14  458.70   14.77
  -3   6 -15  559.30   14.40
  -3   6 -16   58.75    3.41
  -3   5  15   88.08    5.31
  -3   5  14    4.01    1.62
  -3   5  14   -0.84    1.85
  -3   5  13    2.59    2.15
  -3   5  12    5.60    2.53
  -3   5  11    1.11    2.22
  -3   5  10  273.23   15.63
  -3   5  10  263.67   13.44
  -3   5   9  288.98   15.54
  -3   5   9  338.51   14.75
  -3   5   8   40.83    5.79
  -3   5   7  774.05   22.53
  -3   5   6  648.85   19.06
  -3   5   5 1225.76   23.58
  -3   5   4 1186.47   21.14
  -3   5   3    0.39    1.18
  -3   5   2  770.87   14.51
  -3   5   1  800.30   13.96
  -3   5   1  771.61   13.85
  -3   5   1  777.14    9.98
  -3   5   0  116.60    5.31
  -3   5   0  119.20    5.40
  -3   5   0  109.43    4.57
  -3   5   0  109.36    5.14
  -3   5  -1 1370.78   17.33
  -3   5  -1 1424.50   18.28
  -3   5  -1 1421.85   18.42
  -3   5  -2  561.23   11.48
  -3   5  -2  565.99   12.06
  -3   5  -2  556.46   10.76
  -3   5  -2  528.28   12.37
  -3   5  -3 1921.62   21.68
  -3   5  -3 1915.67   25.29
  -3   5  -4  197.66    7.17
  -3   5  -4  213.51    9.07
  -3   5  -5  418.94   10.73
  -3   5  -5  419.50   13.53
  -3   5  -6   93.25    6.83
  -3   5  -6   90.53    5.18
  -3   5  -7   63.70    6.05
  -3   5  -8   50.88    5.63
  -3   5  -9    9.37    2.48
  -3   5  -9   11.41    3.51
  -3   5  -9   10.11    3.29
  -3   5 -10  476.92   18.17
  -3   5 -10  442.63   16.03
  -3   5 -10  485.26   18.49
   3  -5  10  466.74   17.40
   3  -5  11   78.19    7.31
  -3   5 -11   80.82    7.71
   3  -5  12  159.34   10.16
  -3   5 -12  163.52   10.46
   3  -5  13  120.36    8.49
  -3   5 -13  122.16    8.42
   3  -5  14   10.29    2.78
   3  -5  15  582.40   13.82
  -3   5 -16  243.96    7.12
  -3   4  16   14.28    1.96
  -3   4  15   25.55    3.26
  -3   4  14   80.70    5.97
  -3   4  14   67.05    6.00
  -3   4  13    2.80    2.46
  -3   4  13    2.55    1.93
  -3   4  12  192.87   10.54
  -3   4  12  180.10   10.92
  -3   4  11  464.15   16.60
  -3   4  11  476.61   17.75
  -3   4  10  199.25   11.43
  -3   4  10  180.56   12.25
  -3   4   9 1016.89   27.47
  -3   4   8  341.26   15.11
  -3   4   7  152.75    9.45
  -3   4   6  762.22   18.99
  -3   4   5  381.44   12.23
  -3   4   4 3465.37   33.76
  -3   4   3 3282.78   29.62
  -3   4   2    3.85    0.79
  -3   4   2    1.94    1.34
  -3   4   1 2190.77   21.60
  -3   4   1 2181.59   17.53
  -3   4   0   44.52    2.95
  -3   4   0   44.74    2.88
  -3   4   0   42.93    3.12
  -3   4  -1 1374.00   14.90
  -3   4  -1 1421.79   16.04
  -3   4  -1 1371.77   16.97
  -3   4  -1 1435.09   17.36
  -3   4  -2 1469.03   16.30
  -3   4  -2 1492.15   18.51
  -3   4  -2 1519.13   15.24
  -3   4  -3  692.56   11.45
  -3   4  -3  691.74   14.14
  -3   4  -4   35.69    2.81
  -3   4  -4   43.53    3.97
  -3   4  -5  107.35    6.65
  -3   4  -5  110.34    4.94
  -3   4  -6  479.41   14.75
  -3   4  -7   37.45    4.49
  -3   4  -8  742.02   20.25
  -3   4  -9  473.04   17.46
  -3   4  -9  498.06   17.60
  -3   4 -10  233.02   12.64
  -3   4 -10  227.42   12.52
   3  -4  10  231.69   12.55
  -3   4 -11  541.63   19.05
   3  -4  11  562.44   19.61
   3  -4  12   71.23    7.32
  -3   4 -12   74.89    7.15
   3  -4  13  298.61   13.52
  -3   4 -13  290.02   12.55
   3  -4  14  284.84   12.05
   3  -4  15    1.07    1.43
   3  -4  16  236.12    6.96
  -3   4 -16  236.07    7.11
  -3   3  16   58.35    4.04
  -3   3  16   50.46    3.91
  -3   3  15    6.68    2.12
  -3   3  15    4.43    1.73
  -3   3  14   21.34    3.78
  -3   3  14   23.32    3.59
  -3   3  13  109.25    8.08
  -3   3  13  114.34    8.52
  -3   3  12   18.97    4.11
  -3   3  12   21.69    3.85
  -3   3  11  439.52   18.76
  -3   3  11  389.17   15.60
  -3   3  11  405.95   15.87
  -3   3  10 1560.40   33.88
  -3   3  10 1575.05   31.44
  -3   3   9   83.37    7.61
  -3   3   8 1189.69   26.23
  -3   3   7   10.99    2.92
  -3   3   6 1009.06   20.35
  -3   3   5 2272.87   18.86
  -3   3   5 2311.74   28.19
  -3   3   4  170.66    7.03
  -3   3   4  163.59    4.68
  -3   3   3 2620.22   24.67
  -3   3   3 2689.97   17.99
  -3   3   2  427.30    9.17
  -3   3   1  730.43   11.53
  -3   3   0 1322.95   15.25
  -3   3   0 1302.35   14.43
  -3   3  -1  624.86   10.90
  -3   3  -1  614.23    9.08
  -3   3  -1  622.60   10.76
  -3   3  -1  613.75    8.36
  -3   3  -2 1169.08   12.49
  -3   3  -2 1189.60   16.17
  -3   3  -3  657.61    9.49
  -3   3  -3  650.34   13.21
  -3   3  -3  627.66   11.81
  -3   3  -4   51.37    2.81
  -3   3  -4   52.35    4.14
  -3   3  -5  929.60   18.23
  -3   3  -5  995.00   18.63
  -3   3  -6   77.34    5.84
  -3   3  -6   84.27    6.02
  -3   3  -7  374.96   13.49
  -3   3  -7  410.14   14.13
  -3   3  -8   39.23    4.69
  -3   3  -8   46.65    5.14
  -3   3  -9  557.15   18.21
   3  -3   9  549.50   18.58
  -3   3 -10   75.55    7.33
  -3   3 -10   82.23    7.15
   3  -3  10   82.28    7.70
  -3   3 -11  702.31   21.13
   3  -3  11  698.44   22.14
   3  -3  12   77.93    7.58
  -3   3 -12   88.28    7.41
   3  -3  13   84.63    7.54
   3  -3  14  172.63    9.54
   3  -3  15  251.11    9.74
   3  -3  16    7.89    1.56
  -3   2  17   -1.54    1.06
  -3   2  16   15.95    2.34
  -3   2  16   19.51    3.07
  -3   2  15    4.10    2.32
  -3   2  15    3.52    1.85
  -3   2  14    1.09    1.93
  -3   2  14    3.58    2.24
  -3   2  13  508.04   17.97
  -3   2  13  501.18   17.36
  -3   2  12  713.01   21.36
  -3   2  12  704.81   20.83
  -3   2  11  161.96   10.02
  -3   2  11  173.79   10.70
  -3   2  11  172.86   11.48
  -3   2  11  150.26    9.47
  -3   2  10 1816.29   34.66
  -3   2   9  180.34   10.36
  -3   2   8  652.11   18.16
  -3   2   7 1104.00   21.75
  -3   2   7 1089.19   17.02
  -3   2   6  819.67   17.22
  -3   2   6  808.94   13.55
  -3   2   5 1709.68   22.40
  -3   2   5 1609.55   17.48
  -3   2   4 2148.33   22.52
  -3   2   4 2031.57   17.94
  -3   2   3   42.66    3.02
  -3   2   3   40.68    2.47
  -3   2   2 1483.76   13.76
  -3   2   2 1529.22   15.92
  -3   2   1  397.58    7.84
  -3   2   1  368.94    6.95
  -3   2   0 6482.40   31.40
  -3   2   0 6359.55   22.20
  -3   2  -1 1135.73   13.72
  -3   2  -1 1109.16   11.41
  -3   2  -1 1092.43   13.86
  -3   2  -1 1110.36   10.26
  -3   2  -1 1076.07    8.38
  -3   2  -2  326.46    5.25
  -3   2  -2  326.28    7.45
  -3   2  -2  333.69    8.28
  -3   2  -3  152.23    6.17
  -3   2  -3  150.79    5.89
  -3   2  -3  149.37    3.52
  -3   2  -4  157.33    6.81
  -3   2  -4  160.06    6.77
  -3   2  -5   11.71    2.37
  -3   2  -5   12.97    2.47
  -3   2  -6   72.07    5.52
  -3   2  -6   66.12    5.28
  -3   2  -7 1139.13   23.23
  -3   2  -7 1160.63   23.21
  -3   2  -8  716.73   19.16
  -3   2  -8  714.72   19.79
  -3   2  -9   92.47    7.31
  -3   2  -9   92.88    7.65
   3  -2   9   87.15    7.97
  -3   2 -10  532.86   18.13
  -3   2 -10  501.18   17.55
   3  -2  10  501.81   18.74
   3  -2  11    8.02    3.11
  -3   2 -11    5.24    2.36
   3  -2  12  536.26   19.38
   3  -2  13  269.47   13.12
   3  -2  14    2.00    2.26
   3  -2  15  394.45   11.97
   3  -2  16   62.95    3.56
  -3   1  18  137.30    5.00
  -3   1  17  110.79    6.21
  -3   1  16   78.79    6.26
  -3   1  15   19.74    3.67
  -3   1  15   20.53    3.29
  -3   1  14  151.30   10.12
  -3   1  14  140.31    8.69
  -3   1  13    2.03    2.59
  -3   1  13    2.91    2.14
  -3   1  12  779.73   24.02
  -3   1  12  719.29   20.35
  -3   1  12  776.66   22.60
  -3   1  12  746.33   22.09
  -3   1  11 1464.47   31.34
  -3   1  11 1365.79   28.99
  -3   1  10  316.65   13.80
  -3   1   9 1425.48   23.14
  -3   1   9 1393.42   27.27
  -3   1   8   68.68    4.87
  -3   1   8   75.53    6.01
  -3   1   7  912.20   18.67
  -3   1   7  893.96   15.95
  -3   1   6 2082.50   22.48
  -3   1   6 2134.11   25.80
  -3   1   5   11.36    2.02
  -3   1   5   10.32    1.71
  -3   1   4 3215.28   25.59
  -3   1   4 3174.49   23.65
  -3   1   3   21.09    1.95
  -3   1   3   20.85    2.03
  -3   1   2 3443.43   21.83
  -3   1   2 3475.49   21.73
  -3   1   1 5644.84   26.93
  -3   1   1 5725.06   27.51
  -3   1   0   11.20    1.41
  -3   1   0   10.75    1.25
  -3   1  -1 1287.06   13.35
  -3   1  -2   52.91    3.16
  -3   1  -2   52.50    3.34
  -3   1  -3  100.44    4.95
  -3   1  -3   95.84    4.76
  -3   1  -4   12.72    2.38
  -3   1  -4    9.92    2.01
  -3   1  -5  384.70   11.24
  -3   1  -5  380.41   11.62
  -3   1  -6  388.17   12.23
  -3   1  -6  393.07   12.73
  -3   1  -7  361.89   13.24
  -3   1  -7  359.95   12.79
  -3   1  -8  431.93   14.71
  -3   1  -8  410.80   15.13
  -3   1  -9   14.29    3.11
   3  -1   9   18.24    4.23
  -3   1  -9   11.55    2.81
   3  -1  10  713.43   22.43
  -3   1 -10  728.25   22.20
   3  -1  11  775.55   23.69
   3  -1  12  151.07   10.40
   3  -1  13  824.16   22.25
   3  -1  14  206.54    9.98
   3  -1  15  329.42   10.38
  -3   0  18  120.21    5.65
  -3   0  17   94.99    6.25
  -3   0  16  475.73   15.84
  -3   0  15   -2.30    2.72
  -3   0  14  891.66   24.50
  -3   0  13  736.05   22.51
  -3   0  12   62.79    6.69
  -3   0  12   69.62    6.69
  -3   0  12   64.99    7.07
  -3   0  11  633.95   20.10
  -3   0  11  638.82   17.83
  -3   0  10  106.12    7.95
  -3   0  10  101.48    6.94
  -3   0   9  717.39   18.56
  -3   0   9  734.50   17.34
  -3   0   8 1595.83   25.46
  -3   0   8 1534.98   23.43
  -3   0   7   10.03    2.10
  -3   0   7    7.17    1.85
  -3   0   6 2347.71   24.74
  -3   0   6 2422.36   25.92
  -3   0   5  538.77   11.03
  -3   0   5  557.31   11.08
  -3   0   4  613.95   10.84
  -3   0   4  600.94   10.24
  -3   0   3 2119.69   18.82
  -3   0   3 2083.46   16.86
  -3   0   2  692.72    8.77
  -3   0   2  678.91   10.10
  -3   0   1  453.36    6.87
  -3   0   1  439.35    7.91
  -3   0   0  314.46    6.05
  -3   0   0  322.65    6.89
  -3   0  -1   15.20    1.83
  -3   0  -2   21.71    2.32
  -3   0  -2   23.57    2.34
  -3   0  -3  448.06   10.59
  -3   0  -3  436.52   10.06
  -3   0  -4   35.69    3.32
  -3   0  -4   33.26    3.37
  -3   0  -5  285.92   10.37
  -3   0  -5  291.55    9.71
  -3   0  -6 1308.98   23.92
  -3   0  -6 1322.70   22.39
  -3   0  -7  201.28   10.16
  -3   0  -7  216.83    9.82
  -3   0  -8   63.49    6.20
  -3   0  -8   72.64    6.05
  -3   0  -9  127.40    9.22
   3   0   9  121.64    8.37
   3   0   9  133.03    9.61
   3   0  10   37.78    4.64
   3   0  10   45.75    5.98
   3   0  11 1407.05   31.67
   3   0  12  281.97   13.83
   3   0  13  178.51   10.25
   3   0  14  304.88   11.39
   3   0  15    5.31    1.61
  -3  -1  18  108.33    5.79
  -3  -1  17  275.94   11.04
  -3  -1  16  492.51   16.56
  -3  -1  15  345.16   15.03
  -3  -1  14  159.37   10.76
  -3  -1  13  679.05   21.59
  -3  -1  13  692.40   20.84
  -3  -1  12  229.74   11.66
  -3  -1  12  239.55   12.07
  -3  -1  12  239.05   12.56
  -3  -1  12  239.17   12.66
  -3  -1  11   59.84    5.85
  -3  -1  11   62.02    6.22
  -3  -1  10 1784.19   30.22
  -3  -1  10 1788.05   29.44
  -3  -1   9  453.80   14.00
  -3  -1   9  461.73   14.38
  -3  -1   8 3042.58   33.89
  -3  -1   8 2980.94   33.31
  -3  -1   7 3438.86   32.55
  -3  -1   7 3526.67   34.05
  -3  -1   6  416.78   10.17
  -3  -1   6  419.48   10.97
  -3  -1   5  624.51   12.32
  -3  -1   5  615.25   10.85
  -3  -1   4  111.54    4.96
  -3  -1   4  116.85    4.15
  -3  -1   3 1432.85   16.36
  -3  -1   3 1413.95   12.35
  -3  -1   2  399.68    5.76
  -3  -1   2  408.07    8.20
  -3  -1   1   28.26    1.55
  -3  -1   1   38.54    2.53
  -3  -1   0   75.24    3.48
  -3  -1  -1   56.19    3.47
  -3  -1  -2   79.01    4.12
  -3  -1  -2   82.86    4.65
  -3  -1  -3   23.87    2.91
  -3  -1  -3   24.50    2.51
  -3  -1  -4 1635.61   21.11
  -3  -1  -4 1632.09   23.54
  -3  -1  -5  696.95   16.82
  -3  -1  -5  684.49   14.79
  -3  -1  -6  645.50   17.73
  -3  -1  -6  685.72   16.03
  -3  -1  -7  718.46   19.88
  -3  -1  -7  796.41   18.52
  -3  -1  -8   23.97    4.12
   3   1   8   22.97    4.15
   3   1   9  314.87   14.96
  -3  -1  -9  312.51   14.67
   3   1   9  284.97   13.22
   3   1  10 1014.32   27.03
   3   1  10 1028.97   24.86
   3   1  11   71.47    6.63
   3   1  11   61.60    7.09
   3   1  12 1471.99   29.98
   3   1  13   74.03    6.41
   3   1  14  427.77   12.15
   3   1  15    6.61    1.26
  -3  -2  18    0.34    1.04
  -3  -2  17  203.12    9.66
  -3  -2  16    5.91    2.85
  -3  -2  15  967.38   25.08
  -3  -2  14  473.97   18.09
  -3  -2  13  100.77    8.77
  -3  -2  13   94.64    8.03
  -3  -2  13   90.72    7.64
  -3  -2  12  284.22   13.61
  -3  -2  12  271.97   13.09
  -3  -2  12  261.26   12.22
  -3  -2  12  248.07   12.49
  -3  -2  11   74.08    6.71
  -3  -2  11   85.57    6.92
  -3  -2  10  589.29   17.44
  -3  -2  10  602.93   17.00
  -3  -2   9 3248.78   38.90
  -3  -2   9 3442.97   37.45
  -3  -2   8    6.19    2.10
  -3  -2   8    7.92    2.17
  -3  -2   7 3940.30   37.45
  -3  -2   7 3993.67   33.27
  -3  -2   6  539.87   13.03
  -3  -2   6  529.95   10.79
  -3  -2   5 1439.06   19.58
  -3  -2   5 1385.00   15.12
  -3  -2   4  258.07    7.76
  -3  -2   4  261.14    5.45
  -3  -2   3  251.87    7.21
  -3  -2   3  253.40    4.21
  -3  -2   2  467.02    9.24
  -3  -2   2  415.11    4.37
  -3  -2   1   34.15    2.48
  -3  -2   0  583.32    9.92
   3   2   0  616.47    6.97
  -3  -2  -1   45.73    3.47
   3   2   1   46.80    1.54
  -3  -2  -2  306.14    8.08
  -3  -2  -2  297.06    9.24
  -3  -2  -3  286.49    9.74
  -3  -2  -3  284.57    8.28
  -3  -2  -4   23.92    2.80
  -3  -2  -4   31.10    3.70
  -3  -2  -5 2285.98   26.88
  -3  -2  -5 2328.19   32.35
  -3  -2  -6  220.90   10.94
  -3  -2  -7  586.74   18.72
   3   2   8  347.09   15.40
   3   2   8  338.59   14.60
  -3  -2  -8  371.45   15.74
   3   2   9  186.48   11.64
   3   2   9  177.73   10.85
   3   2  10 1769.29   33.00
   3   2  10 1775.86   35.09
   3   2  11  241.71   11.62
   3   2  11  264.52   13.11
   3   2  12  173.13    9.81
   3   2  13  232.37    9.73
   3   2  14  243.16    7.56
  -3  -3  18   17.50    2.67
  -3  -3  17  107.26    7.09
  -3  -3  16  317.90   13.38
  -3  -3  15   55.44    6.70
   3   3 -15   57.91    5.77
  -3  -3  14 1739.15   34.12
   3   3 -14 1730.48   31.77
  -3  -3  13  232.39   12.64
   3   3 -13  208.49   11.33
   3   3 -12  292.06   13.72
  -3  -3  12  307.25   14.27
  -3  -3  12  305.68   13.51
  -3  -3  12  327.34   14.62
  -3  -3  11 1034.59   25.07
  -3  -3  11 1056.83   23.58
  -3  -3  10   11.73    2.78
  -3  -3  10    1.68    1.53
  -3  -3   9  752.03   19.31
  -3  -3   9  807.71   17.67
  -3  -3   8  284.77   11.30
  -3  -3   8  286.19    9.57
  -3  -3   7  938.39   15.50
  -3  -3   7  923.53   18.94
  -3  -3   6  639.22   14.67
  -3  -3   6  649.92   11.14
  -3  -3   5   52.50    4.08
  -3  -3   5   58.99    2.82
  -3  -3   4   11.67    0.93
  -3  -3   4   13.39    2.03
  -3  -3   3  594.80   11.63
  -3  -3   2 1785.34   18.96
  -3  -3   1   37.35    2.75
   3   3   0  758.89    9.54
  -3  -3   0  729.88   11.45
  -3  -3   0  727.74   13.88
   3   3   1   60.33    2.45
  -3  -3  -1   54.00    4.10
  -3  -3  -2   14.49    1.98
  -3  -3  -2   13.32    2.53
  -3  -3  -3  730.70   13.32
  -3  -3  -3  710.53   16.42
  -3  -3  -4 1223.27   23.23
  -3  -3  -5  338.62   13.12
  -3  -3  -6 1760.85   32.09
  -3  -3  -7   19.08    4.17
   3   3   7   17.42    3.80
   3   3   7   15.47    3.64
   3   3   8 1872.89   35.57
   3   3   8 1912.41   35.48
   3   3   9  129.29    9.82
   3   3   9  124.96    9.30
   3   3  10  288.14   13.71
   3   3  10  271.27   13.02
   3   3  11  156.24    9.43
   3   3  12   -1.13    1.61
   3   3  13  103.43    5.26
   3   3  13  110.44    6.33
  -3  -4  18   33.34    3.19
  -3  -4  17   69.84    5.71
   3   4 -16  192.32    9.43
  -3  -4  16  189.18   10.14
  -3  -4  15 1215.83   27.21
   3   4 -15 1245.31   26.41
   3   4 -14   31.67    4.73
  -3  -4  14   34.72    5.27
  -3  -4  13 1274.11   28.79
   3   4 -12   86.17    7.93
  -3  -4  12   89.11    8.04
  -3  -4  12   89.14    7.73
  -3  -4  11 1544.45   31.66
  -3  -4  10  640.87   16.64
  -3  -4  10  652.01   19.76
  -3  -4   9  151.77    7.43
  -3  -4   9  148.64    8.91
  -3  -4   8  309.07   12.23
  -3  -4   8  313.86    9.56
  -3  -4   7  285.77   11.04
  -3  -4   6  443.50   12.77
  -3  -4   5  221.27    8.54
  -3  -4   4  378.74   10.45
  -3  -4   3    9.52    1.84
  -3  -4   2  692.33   12.38
   3   4  -1  430.10    8.83
  -3  -4   1  443.82    9.42
  -3  -4   0   43.36    2.92
   3   4   0   41.80    2.64
  -3  -4   0   38.10    3.61
  -3  -4  -1  739.52   15.87
  -3  -4  -2  184.33    8.52
  -3  -4  -3  220.76    9.90
  -3  -4  -4 2235.24   33.41
  -3  -4  -5  157.13    9.52
  -3  -4  -6  523.27   18.38
   3   4   6  481.52   17.57
   3   4   7  494.41   17.91
  -3  -4  -7  511.72   18.99
   3   4   7  474.00   18.10
   3   4   8  589.23   20.11
   3   4   8  574.64   19.59
   3   4   9 1173.56   27.22
   3   4   9 1184.45   27.84
   3   4  10    5.61    2.55
   3   4  10    3.41    2.70
   3   4  11  122.02    7.29
   3   4  12   72.13    5.64
   3   4  13    9.57    1.89
  -3  -5  18  101.07    4.99
   3   5 -17  134.79    6.89
  -3  -5  17  131.48    7.15
  -3  -5  16    6.29    2.20
   3   5 -16    4.26    2.67
  -3  -5  15  716.85   20.06
   3   5 -15  692.09   20.14
  -3  -5  14  576.60   18.91
   3   5 -14  544.20   18.85
   3   5 -13  416.32   17.11
  -3  -5  13  417.66   16.31
   3   5 -12 1448.44   31.53
  -3  -5  12 1457.33   30.02
   3   5 -11  539.37   18.84
  -3  -5  11  537.92   19.27
  -3  -5  10 1371.68   29.43
  -3  -5   9   91.20    7.49
  -3  -5   8   39.69    4.75
  -3  -5   7  119.81    7.50
  -3  -5   6   12.91    2.54
  -3  -5   5   20.88    3.07
  -3  -5   4    9.17    2.13
  -3  -5   3 1078.97   17.04
   3   5  -2  448.32   10.64
  -3  -5   2  460.28   10.48
   3   5  -1   64.65    3.91
  -3  -5   1   55.24    4.52
  -3  -5   1   61.92    3.71
  -3  -5   0  888.92   17.97
   3   5   0  924.45   13.96
  -3  -5  -1  515.99   14.48
  -3  -5  -2 1597.46   26.71
  -3  -5  -3  359.17   13.36
  -3  -5  -4  248.32   11.82
  -3  -5  -5  952.26   24.32
   3   5   5  861.75   23.58
  -3  -5  -6  237.74   12.87
   3   5   6  210.42   12.25
   3   5   7 1847.64   35.87
   3   5   8  121.16    9.29
   3   5   9  354.27   14.88
   3   5  10  136.44    9.46
   3   5  11   47.54    5.01
   3   5  12   11.99    2.08
   3   6 -18   35.20    2.76
   3   6 -17  621.49   14.91
  -3  -6  17  622.96   13.62
  -3  -6  16  482.17   14.22
   3   6 -16  503.39   15.68
  -3  -6  15   47.28    5.17
   3   6 -15   48.14    5.76
  -3  -6  14  232.26   11.71
   3   6 -14  217.73   12.07
   3   6 -13  191.79   11.89
   3   6 -12 1309.29   30.46
   3   6 -11  679.94   21.60
  -3  -6  11  712.91   22.85
   3   6 -10  336.38   14.63
  -3  -6  10  320.54   14.91
  -3  -6   9   44.49    5.59
  -3  -6   8    4.44    2.24
  -3  -6   7    5.91    2.27
  -3  -6   6  342.86   12.18
  -3  -6   5  150.72    7.66
  -3  -6   4   85.12    5.39
  -3  -6   3  788.48   14.97
   3   6  -3  757.30   15.97
   3   6  -2  362.96   10.52
   3   6  -1  163.25    6.88
  -3  -6   1  174.99    8.43
  -3  -6   0 1432.58   24.67
  -3  -6  -1  967.36   21.24
  -3  -6  -2 1701.65   29.27
   3   6   3  842.78   22.10
  -3  -6  -3  890.41   22.33
   3   6   4   68.23    6.62
  -3  -6  -4   71.23    6.75
   3   6   4   73.17    7.09
   3   6   4   64.23    7.84
   3   6   5 1055.11   24.87
   3   6   5 1045.82   26.65
   3   6   6  195.40   11.76
   3   6   6  199.97   13.77
   3   6   7  646.34   20.91
   3   6   7  661.38   24.28
   3   6   8  529.91   20.54
   3   6   8  525.10   18.25
   3   6   9   37.23    5.48
   3   6  10   23.60    3.71
   3   6  11    4.13    1.59
   3   7 -18  312.91    7.77
   3   7 -17  126.77    6.63
   3   7 -16  462.45   14.81
   3   7 -15   31.74    4.75
   3   7 -14  411.37   16.45
   3   7 -13  252.10   11.79
   3   7 -13  265.04   13.79
   3   7 -13  263.26   13.70
   3   7 -12  157.88   10.78
   3   7 -11  126.27    9.50
   3   7 -10    4.31    2.34
  -3  -7  10   12.05    3.20
   3   7  -9   23.88    3.94
  -3  -7   9   25.35    4.04
   3   7  -9   33.78    5.07
  -3  -7   8   23.81    3.89
  -3  -7   7  252.70   11.69
  -3  -7   6    7.70    2.37
  -3  -7   5  739.94   17.24
   3   7  -4   26.59    3.76
   3   7  -3    1.84    1.55
  -3  -7   2  136.91    7.87
   3   7  -2  141.31    7.23
  -3  -7   1  216.99   10.00
  -3  -7   0   46.92    4.95
   3   7   1 2970.86   44.66
  -3  -7  -1 2797.93   38.23
  -3  -7  -2   14.91    3.25
   3   7   2   14.11    3.76
   3   7   2   14.81    4.10
   3   7   2   21.56    3.86
   3   7   3 1229.56   28.17
  -3  -7  -3 1274.24   27.66
   3   7   3 1276.17   28.08
   3   7   3 1345.48   33.50
   3   7   4  304.45   14.07
   3   7   4  283.35   13.75
   3   7   5  194.96   11.57
   3   7   5  189.10   13.20
   3   7   6  359.97   15.48
   3   7   6  372.06   18.13
   3   7   7   10.47    3.75
   3   7   8   25.55    4.47
   3   7   9   40.07    4.80
   3   7  10   88.64    5.47
   3   8 -17  180.76    7.47
   3   8 -16  759.19   17.96
   3   8 -15   28.72    4.30
   3   8 -14  177.03    9.15
   3   8 -14  177.76   10.69
   3   8 -13  218.42   12.16
   3   8 -13  231.67   12.80
   3   8 -13  229.19   11.25
   3   8 -12  342.78   15.53
   3   8 -11   78.31    7.64
   3   8 -10   86.68    7.94
  -3  -8   9    8.13    2.79
   3   8  -9    2.72    2.43
   3   8  -9    3.22    2.28
   3   8  -8  168.81   10.63
   3   8  -8  165.30   10.57
  -3  -8   8  177.59   10.79
   3   8  -7  215.35   11.86
   3   8  -7  224.82   11.64
   3   8  -6  826.84   22.63
   3   8  -6  881.57   22.43
   3   8  -6  835.25   22.96
   3   8  -5    4.40    2.29
   3   8  -4   80.82    6.58
   3   8  -3  311.35   13.18
   3   8  -3  316.35   11.96
   3   8  -3  316.65   13.59
  -3  -8   3  321.65   12.67
   3   8  -2   24.18    3.94
  -3  -8   2   25.32    4.03
   3   8  -2   23.19    4.09
   3   8  -1 1409.08   29.54
  -3  -8   1 1433.80   27.43
   3   8   0  459.80   17.33
  -3  -8   0  466.28   15.97
   3   8   0  505.50   18.74
   3   8   1 1632.06   33.18
   3   8   1 1776.88   36.54
   3   8   2 1161.35   28.28
   3   8   2 1199.11   31.38
   3   8   3  207.27   11.99
   3   8   3  220.98   13.92
   3   8   4  278.61   15.94
   3   8   5   55.24    7.19
   3   8   6   99.14    9.10
   3   8   7  268.93   13.20
   3   8   8  162.63    8.84
   3   8   9   84.97    5.25
   3   9 -17  160.89    6.30
   3   9 -16   78.56    5.50
   3   9 -15   48.73    5.01
   3   9 -14   31.72    4.15
   3   9 -14   27.71    4.47
   3   9 -13   14.50    3.44
   3   9 -13   11.81    3.47
   3   9 -13   15.73    3.91
   3   9 -12  195.71   11.52
   3   9 -12  182.87   11.69
   3   9 -11   91.84    8.23
   3   9 -10  283.59   14.24
   3   9  -9   23.91    4.43
   3   9  -9   35.99    5.62
   3   9  -8   10.94    3.24
   3   9  -8    5.12    3.53
   3   9  -7  553.51   19.53
   3   9  -7  592.42   19.57
   3   9  -6   66.97    7.17
   3   9  -6   64.97    6.91
   3   9  -6   72.29    7.03
   3   9  -5 1570.17   32.54
   3   9  -5 1626.77   31.63
   3   9  -5 1533.92   30.44
   3   9  -4   47.09    5.80
   3   9  -4   34.51    4.51
   3   9  -4   37.07    5.24
   3   9  -3 1566.41   33.08
   3   9  -3 1683.77   32.78
   3   9  -2   45.73    5.78
   3   9  -2   48.55    5.92
   3   9  -1  714.02   22.18
   3   9  -1  768.11   23.32
   3   9   0  660.64   21.68
   3   9   0  717.04   23.17
   3   9   1   18.77    4.60
   3   9   1   16.97    4.33
   3   9   2  224.99   13.82
   3   9   3   26.96    5.30
   3   9   4  476.60   19.39
   3   9   5  257.95   13.66
   3   9   6   39.94    5.15
   3   9   7   27.51    3.88
   3   9   8  136.13    6.31
   3  10 -16   43.20    3.70
   3  10 -15   89.38    4.82
   3  10 -15  102.51    6.50
   3  10 -14   67.72    5.28
   3  10 -14   67.27    6.00
   3  10 -13   86.93    6.75
   3  10 -13   95.56    7.66
   3  10 -12  245.24   12.24
   3  10 -12  258.72   12.52
   3  10 -12  260.67   13.32
   3  10 -11    4.40    2.75
   3  10 -11    9.02    3.37
   3  10 -10   39.41    5.36
   3  10 -10   39.07    5.99
   3  10  -9   20.70    3.89
   3  10  -9   24.22    5.05
   3  10  -8  319.47   15.15
   3  10  -8  337.87   15.41
   3  10  -7  478.77   18.44
   3  10  -7  451.08   17.57
   3  10  -6  298.56   14.74
   3  10  -6  269.95   13.71
   3  10  -5  521.53   19.36
   3  10  -5  461.80   17.66
   3  10  -4  381.06   15.95
   3  10  -3  548.77   19.43
   3  10  -2  700.36   22.35
   3  10  -1    1.79    3.06
   3  10   0  421.67   18.04
   3  10   1  255.18   14.25
   3  10   2   29.16    5.58
   3  10   3  468.17   18.23
   3  10   4    0.56    2.49
   3  10   5  234.61   11.16
   3  10   6   30.12    3.73
   3  10   7   22.70    2.43
   3  11 -15   82.38    4.91
   3  11 -14    4.44    1.72
   3  11 -14    7.57    2.33
   3  11 -13    3.53    2.00
   3  11 -13    2.52    1.83
   3  11 -12  201.48   10.36
   3  11 -12  205.69   10.01
   3  11 -12  219.13   10.94
   3  11 -11   11.92    3.13
   3  11 -11    7.54    2.80
   3  11 -11    7.19    2.78
   3  11 -10   75.83    6.90
   3  11 -10   63.51    6.56
   3  11  -9  250.83   12.81
   3  11  -9  240.31   12.85
   3  11  -8   37.78    5.58
   3  11  -8   36.60    5.81
   3  11  -7   11.56    3.42
   3  11  -7    7.48    3.52
   3  11  -6  332.23   15.02
   3  11  -5   13.13    3.81
   3  11  -4 1221.51   28.77
   3  11  -3   26.12    4.93
   3  11  -2 1182.85   28.73
   3  11  -1  373.16   16.30
   3  11   0  149.89   10.29
   3  11   1   33.87    5.18
   3  11   2   15.16    3.66
   3  11   3   78.34    6.85
   3  11   4  396.13   13.06
   3  11   5   29.84    3.05
   3  12 -14    6.14    1.39
   3  12 -13    2.34    1.36
   3  12 -12   50.24    4.89
   3  12 -11   29.39    4.36
   3  12 -10  117.11    8.73
   3  12  -9  578.29   20.01
   3  12  -8  750.89   21.34
   3  12  -7    5.21    3.54
   3  12  -6  174.00   10.63
   3  12  -5   34.90    5.19
   3  12  -4  561.14   18.81
   3  12  -3  598.83   19.46
   3  12  -2    0.76    2.17
   3  12  -1  133.58    9.05
   3  12   0    3.43    2.37
   3  12   1   82.03    6.64
   3  12   2   80.96    5.98
   3  12   3  223.25    8.44
   3  13 -12   14.84    2.37
   3  13 -11    4.22    1.83
   3  13 -10  616.35   16.95
   3  13  -9   27.97    4.49
   3  13  -8  671.82   19.71
   3  13  -7   94.02    7.70
   3  13  -7   97.67    7.53
   3  13  -6  293.35   12.60
   3  13  -6  356.27   13.80
   3  13  -5  256.74   10.73
   3  13  -5  339.32   13.52
   3  13  -4    7.80    3.08
   3  13  -3  383.90   13.96
   3  13  -2  108.20    7.40
   3  13  -1   10.79    2.76
   3  13   0  130.02    7.10
   3  13   1    6.95    1.77
   3  14  -5  178.47    8.31
   3  14  -4  202.01    8.55
   3  14  -3   31.67    3.25
  -4  15  -2   71.01    6.10
  -4  15  -3   25.36    3.88
  -4  15  -4   14.54    2.89
  -4  15  -5   17.56    3.26
  -4  15  -6   -1.73    1.58
  -4  15  -7   94.13    5.63
  -4  14   4   34.72    3.58
  -4  14   3  663.97   16.24
  -4  14   2   -0.19    1.74
  -4  14   1  561.18   16.11
  -4  14   0   33.05    3.92
  -4  14   0   31.28    4.73
  -4  14  -1   39.09    5.31
  -4  14  -2    7.98    2.99
  -4  14  -3   18.33    4.01
  -4  14  -4   33.18    5.09
  -4  14  -5   14.10    3.97
  -4  14  -6   53.01    5.89
  -4  14  -6   53.77    4.93
  -4  14  -7   92.67    7.20
  -4  14  -7  100.25    6.59
  -4  14  -8  174.49    8.22
  -4  14  -9  413.97   11.46
  -4  14  -9  387.97   11.56
  -4  13   7   44.84    3.08
  -4  13   6  164.37    7.30
  -4  13   5  342.44   11.98
  -4  13   4  128.79    8.27
  -4  13   3  112.03    8.17
  -4  13   2   66.78    6.70
  -4  13   2   71.65    6.66
  -4  13   1  331.01   14.33
  -4  13   1  359.16   14.86
  -4  13   0   65.85    6.41
  -4  13   0   61.18    6.60
  -4  13  -1    4.46    2.76
  -4  13  -1    3.70    2.43
  -4  13  -2  218.36   12.17
  -4  13  -3    4.99    2.95
  -4  13  -3    3.57    2.55
  -4  13  -4  308.58   12.89
  -4  13  -4  301.60   13.81
  -4  13  -5   16.61    3.38
  -4  13  -6  384.85   15.07
  -4  13  -7   50.42    5.81
  -4  13  -8   22.51    4.05
  -4  13  -9   75.05    6.14
  -4  13 -10  228.62    9.32
  -4  13 -11  168.21    6.89
  -4  12   8  143.67    6.05
  -4  12   7  631.58   15.20
  -4  12   6    3.14    2.48
  -4  12   5  139.16    9.08
  -4  12   4   13.31    3.81
  -4  12   3    4.24    3.21
  -4  12   3    6.59    3.37
  -4  12   2  118.33    9.35
  -4  12   2  123.96    9.17
  -4  12   1   63.51    7.04
  -4  12   1   67.44    7.12
  -4  12   0   -0.70    1.95
  -4  12   0   -2.50    1.96
  -4  12   0   -0.72    1.39
  -4  12  -1   71.31    6.95
  -4  12  -1   86.00    7.33
  -4  12  -1   73.26    7.50
  -4  12  -2  123.86    9.73
  -4  12  -3   98.65    7.84
  -4  12  -3  101.37    8.88
  -4  12  -4  316.76   14.45
  -4  12  -4  325.94   15.27
  -4  12  -5  253.38   13.33
  -4  12  -5  244.25   12.81
  -4  12  -6   19.06    4.30
  -4  12  -7  148.97   10.14
  -4  12  -8  193.38   11.14
  -4  12  -9    6.48    2.80
  -4  12 -10  347.06   12.96
  -4  12 -11   16.54    2.97
  -4  12 -12  608.96   12.71
  -4  11   9  280.73    8.75
  -4  11   8  144.79    7.60
  -4  11   7  384.41   13.95
  -4  11   6  347.68   14.55
  -4  11   5   35.56    5.69
  -4  11   4  187.06   11.95
  -4  11   4  187.73   11.36
  -4  11   3    4.11    2.56
  -4  11   3    2.82    2.68
  -4  11   2    3.45    2.59
  -4  11   2    4.88    2.37
  -4  11   2    0.69    1.61
  -4  11   1    4.94    2.69
  -4  11   1   14.54    3.15
  -4  11   1    8.63    3.30
  -4  11   0  439.90   17.55
  -4  11   0  415.69   17.16
  -4  11  -1   65.40    6.49
  -4  11  -1   54.35    6.30
  -4  11  -2   79.29    7.82
  -4  11  -3  120.08    8.99
  -4  11  -3  101.59    8.86
  -4  11  -4   -2.01    2.70
  -4  11  -4    3.76    1.73
  -4  11  -5  368.94   16.51
  -4  11  -5  370.36   16.48
  -4  11  -6  120.74    9.62
  -4  11  -6  113.25    8.75
  -4  11  -7   48.79    6.32
  -4  11  -8  351.88   15.77
  -4  11  -8  353.51   14.71
  -4  11  -9  236.85   12.49
  -4  11  -9  238.37   11.93
  -4  11 -10   90.07    7.45
  -4  11 -10   95.95    7.37
  -4  11 -11  468.31   14.77
  -4  11 -12    1.78    1.46
  -4  11 -13  582.89   11.18
  -4  10  11  135.26    5.79
  -4  10  10   63.34    4.15
  -4  10  10   67.05    5.04
  -4  10   9  161.19    7.90
  -4  10   9  153.98    8.44
  -4  10   8 1177.19   24.28
  -4  10   8 1175.55   24.92
  -4  10   7   -0.73    1.77
  -4  10   7    0.15    2.23
  -4  10   6  627.87   20.92
  -4  10   5   54.66    6.81
  -4  10   5   51.71    6.32
  -4  10   4    0.68    2.49
  -4  10   4   -2.83    1.86
  -4  10   3   35.04    5.32
  -4  10   3   38.06    5.82
  -4  10   3   32.14    5.22
  -4  10   2   12.42    3.21
  -4  10   2    9.44    3.53
  -4  10   2   10.69    2.92
  -4  10   1  422.66   17.59
  -4  10   1  383.45   15.90
  -4  10   1  372.12   16.71
  -4  10   0  180.26   11.13
  -4  10   0  178.73   10.91
  -4  10  -1  253.07   12.93
  -4  10  -1  231.45   12.55
  -4  10  -1  219.78   11.73
  -4  10  -2   12.02    3.33
  -4  10  -2   13.85    3.93
  -4  10  -3  103.11    8.33
  -4  10  -3  108.41    8.72
  -4  10  -3  102.82    8.64
  -4  10  -4  578.14   20.01
  -4  10  -4  610.65   19.89
  -4  10  -4  557.33   20.20
  -4  10  -5   61.34    7.00
  -4  10  -5   49.62    6.69
  -4  10  -6  869.95   25.33
  -4  10  -6  835.37   25.14
  -4  10  -6  820.15   27.13
  -4  10  -7  414.91   17.72
  -4  10  -7  428.10   17.86
  -4  10  -7  413.53   20.11
  -4  10  -7  441.16   17.04
  -4  10  -8  375.53   16.53
  -4  10  -8  324.68   18.04
  -4  10  -8  353.42   15.61
  -4  10  -9  370.55   15.79
  -4  10  -9  370.74   15.90
  -4  10  -9  324.55   17.89
  -4  10 -10    9.36    3.44
  -4  10 -10    9.97    3.81
  -4  10 -10    7.41    2.85
  -4  10 -11  610.42   17.89
  -4  10 -11  629.87   21.71
  -4  10 -11  609.54   18.58
  -4  10 -12  568.63   15.27
  -4  10 -12  612.26   18.90
  -4  10 -13   20.90    2.70
  -4   9  12  235.24    8.29
  -4   9  11   83.77    5.94
  -4   9  10  290.23   10.42
  -4   9  10  287.83   12.06
  -4   9   9   13.77    3.16
  -4   9   9   17.88    3.47
  -4   9   8  263.87   12.55
  -4   9   8  258.77   13.01
  -4   9   7  231.78   12.62
  -4   9   7  229.89   12.46
  -4   9   6   -0.05    2.25
  -4   9   6    4.78    2.04
  -4   9   5    7.66    2.61
  -4   9   5    1.60    2.32
  -4   9   4  116.85    9.56
  -4   9   4  116.27    9.16
  -4   9   4  121.13   10.17
  -4   9   4  123.99    8.92
  -4   9   3   19.20    3.51
  -4   9   3   22.95    4.18
  -4   9   3   17.52    3.89
  -4   9   3   14.70    4.19
  -4   9   2   29.82    5.10
  -4   9   2   37.37    5.07
  -4   9   2   42.02    5.98
  -4   9   1 1066.85   25.92
  -4   9   1  994.41   25.96
  -4   9   1 1002.17   24.27
  -4   9   0  109.55    8.14
  -4   9   0  110.85    8.12
  -4   9  -1  234.49   11.47
  -4   9  -2  100.67    7.54
  -4   9  -3    2.76    2.16
  -4   9  -3    1.12    1.91
  -4   9  -3   -0.45    1.71
  -4   9  -4  540.79   18.95
  -4   9  -4  507.44   16.97
  -4   9  -4  491.98   18.75
  -4   9  -4  550.38   19.93
  -4   9  -5 1164.57   28.42
  -4   9  -5 1169.84   30.41
  -4   9  -5 1152.95   25.66
  -4   9  -5 1073.45   28.45
  -4   9  -6    3.52    2.18
  -4   9  -6    2.82    2.71
  -4   9  -6    2.10    2.66
  -4   9  -6    6.99    3.02
  -4   9  -7 1598.33   39.10
  -4   9  -7 1505.20   34.80
  -4   9  -7 1527.97   32.55
  -4   9  -8    2.01    2.27
  -4   9  -8    2.30    2.22
  -4   9  -8    5.38    2.07
  -4   9  -9  830.90   24.08
  -4   9  -9  773.57   23.57
  -4   9 -10   15.77    3.92
  -4   9 -10   14.38    4.93
  -4   9 -10   15.09    4.06
  -4   9 -11   14.21    3.52
  -4   9 -11   14.06    3.90
  -4   9 -11   10.39    3.06
  -4   9 -12  345.56   12.49
  -4   9 -12  381.83   16.07
  -4   9 -12  357.30   13.99
  -4   9 -13    9.34    2.01
  -4   9 -13    9.31    2.88
  -4   9 -14   32.20    3.31
  -4   8  14  800.96   11.64
  -4   8  13    3.50    1.58
  -4   8  12  650.87   16.45
  -4   8  11    8.77    2.76
  -4   8  10  253.05   10.78
  -4   8  10  256.18   12.50
  -4   8   9  386.47   14.60
  -4   8   9  376.13   15.92
  -4   8   8   93.66    8.23
  -4   8   8   87.47    7.63
  -4   8   7   21.86    4.93
  -4   8   7   24.93    4.29
  -4   8   6   28.23    4.77
  -4   8   6   29.50    4.60
  -4   8   6   34.88    5.74
  -4   8   6   34.06    5.24
  -4   8   5   18.61    3.68
  -4   8   5   17.18    3.55
  -4   8   5   28.69    4.61
  -4   8   5   15.99    3.61
  -4   8   5   19.63    4.93
  -4   8   4   51.03    5.44
  -4   8   4   43.99    5.15
  -4   8   4   31.58    4.64
  -4   8   4   40.46    6.04
  -4   8   3  204.30   10.23
  -4   8   3  214.25   12.10
  -4   8   2  416.72   14.00
  -4   8   2  409.77   15.54
  -4   8   1  448.07   13.98
  -4   8   1  469.96   15.65
  -4   8   0 1013.56   21.77
  -4   8   0 1011.30   20.40
  -4   8   0 1034.92   22.03
  -4   8  -1    6.45    2.44
  -4   8  -1    7.62    2.31
  -4   8  -1   14.32    2.89
  -4   8  -2   30.78    4.05
  -4   8  -3  446.35   14.43
  -4   8  -4   12.32    2.99
  -4   8  -5 1393.50   29.88
  -4   8  -5 1338.18   25.50
  -4   8  -5 1394.34   32.30
  -4   8  -6  751.69   22.49
  -4   8  -6  684.82   23.25
  -4   8  -6  729.99   21.38
  -4   8  -6  783.39   23.40
  -4   8  -6  734.02   25.12
  -4   8  -7  827.13   24.02
  -4   8  -7  781.08   23.05
  -4   8  -7  752.49   26.98
  -4   8  -7  827.20   24.93
  -4   8  -7  706.94   24.34
  -4   8  -8 1189.92   28.96
  -4   8  -8 1074.77   30.23
  -4   8  -8 1159.92   28.75
  -4   8  -8 1067.33   33.19
  -4   8  -9  463.83   19.42
  -4   8  -9  449.15   17.71
  -4   8  -9  452.69   18.24
  -4   8  -9  404.30   20.73
  -4   8 -10  228.27   12.33
  -4   8 -10  215.31   15.00
  -4   8 -10  224.97   12.82
  -4   8 -11   20.99    3.58
  -4   8 -11   17.85    4.06
  -4   8 -11   21.09    4.78
  -4   8 -12   34.62    4.93
  -4   8 -12   40.95    6.09
  -4   8 -12   49.44    4.97
  -4   8 -13   16.13    2.30
  -4   8 -13   15.71    3.42
  -4   8 -14   53.49    4.61
  -4   8 -15   90.89    4.19
  -4   7  14  303.12    9.45
  -4   7  13  500.33   14.35
  -4   7  12  319.50   13.03
  -4   7  11  444.70   16.44
  -4   7  10  297.70   14.11
  -4   7  10  286.77   12.08
  -4   7   9  133.08    8.88
  -4   7   9  142.53   10.05
  -4   7   8   25.02    5.30
  -4   7   8   27.76    4.31
  -4   7   8   32.78    4.86
  -4   7   7   93.53    7.85
  -4   7   7   86.29    7.61
  -4   7   7   77.97    7.93
  -4   7   6   57.19    6.04
  -4   7   6   61.64    6.59
  -4   7   5  262.11   12.68
  -4   7   4   96.99    7.34
  -4   7   3   24.38    3.64
  -4   7   2  234.03    9.78
  -4   7   2  249.03   10.99
  -4   7   1 1011.16   19.61
  -4   7   1  981.57   20.40
  -4   7   0  323.57   11.27
  -4   7   0  313.77   10.78
  -4   7   0  318.58   11.09
  -4   7  -1  876.27   18.14
  -4   7  -1  886.98   18.01
  -4   7  -1  889.63   17.77
  -4   7  -2   60.27    4.90
  -4   7  -2   61.93    4.89
  -4   7  -3 1817.17   26.24
  -4   7  -3 1865.16   29.47
  -4   7  -4 1139.91   21.07
  -4   7  -4 1157.38   24.92
  -4   7  -5  364.03   12.20
  -4   7  -5  387.88   15.23
  -4   7  -6  838.93   23.21
  -4   7  -7   44.11    5.65
  -4   7  -7   46.39    5.98
  -4   7  -7   42.96    5.52
  -4   7  -8 1096.11   28.44
  -4   7  -8 1050.10   26.58
  -4   7  -8 1026.58   26.88
  -4   7  -9  127.07    9.52
  -4   7  -9  130.41    9.92
  -4   7 -10   90.79    8.01
  -4   7 -10   93.93    8.46
  -4   7 -11   69.12    6.51
  -4   7 -11   71.97    7.35
  -4   7 -12  115.03    9.84
  -4   7 -12  102.31    8.19
  -4   7 -12   89.56    6.60
  -4   7 -13    7.76    3.24
  -4   7 -14  322.14   11.69
  -4   7 -15   15.46    2.07
  -4   6  15  407.99   10.37
  -4   6  14   14.82    2.71
  -4   6  13  204.06   10.29
  -4   6  12    6.18    3.17
  -4   6  11  593.81   19.81
  -4   6  10  149.37   10.29
  -4   6  10  151.44    8.86
  -4   6   9    8.09    2.09
  -4   6   9    8.61    3.14
  -4   6   9    8.87    3.30
  -4   6   8  540.36   21.08
  -4   6   8  605.14   19.84
  -4   6   8  570.44   18.13
  -4   6   7    6.22    2.73
  -4   6   6  104.25    8.21
  -4   6   5  207.11   10.37
  -4   6   4 1330.67   24.61
  -4   6   3  145.61    7.75
  -4   6   2   15.50    2.48
  -4   6   1 1250.36   20.25
  -4   6   1 1299.17   20.88
  -4   6   0 1217.12   19.68
  -4   6   0 1185.18   19.60
  -4   6   0 1151.17   17.74
  -4   6   0 1162.65   18.83
  -4   6  -1 1704.58   22.75
  -4   6  -1 1693.56   23.46
  -4   6  -1 1701.19   23.90
  -4   6  -1 1706.55   21.95
  -4   6  -2 1602.12   25.02
  -4   6  -2 1649.29   23.70
  -4   6  -3 1483.94   21.39
  -4   6  -3 1469.98   25.51
  -4   6  -4 1958.69   31.09
  -4   6  -4 1842.31   24.30
  -4   6  -5   92.55    7.23
  -4   6  -5   94.66    5.55
  -4   6  -6  218.66   11.45
  -4   6  -7   76.84    6.99
  -4   6  -8  102.31    8.36
  -4   6  -8  116.12    9.09
  -4   6  -8  113.43    9.15
  -4   6  -9  735.26   21.87
  -4   6  -9  721.35   22.83
  -4   6 -10  115.08    8.68
  -4   6 -10  118.15    9.38
  -4   6 -11    6.44    2.33
  -4   6 -11    7.70    3.24
   4  -6  12   48.44    5.40
  -4   6 -12   50.29    5.77
   4  -6  13    4.19    1.58
  -4   6 -14   10.64    2.59
  -4   6 -15  161.08    6.65
  -4   5  16   80.77    4.07
  -4   5  15  159.67    7.52
  -4   5  14    4.60    2.03
  -4   5  13  119.42    8.42
  -4   5  12  208.02   11.71
  -4   5  11   95.32    8.33
  -4   5  10    2.83    2.07
  -4   5  10    3.20    2.96
  -4   5   9  284.11   15.29
  -4   5   9  325.96   14.65
  -4   5   8    9.21    3.55
  -4   5   7    9.65    2.96
  -4   5   6  637.87   18.56
  -4   5   5  925.21   20.59
  -4   5   4  372.56   12.06
  -4   5   3  518.23   13.26
  -4   5   2   80.69    5.08
  -4   5   1  651.45   13.64
  -4   5   1  635.56   11.91
  -4   5   0 1921.57   22.18
  -4   5   0 1902.41   23.12
  -4   5   0 1891.78   22.28
  -4   5   0 1866.22   21.08
  -4   5  -1   17.30    2.30
  -4   5  -1   20.35    2.74
  -4   5  -1   20.73    2.70
  -4   5  -1   21.88    2.32
  -4   5  -2 6246.07   38.88
  -4   5  -2 6235.68   46.47
  -4   5  -3  278.39    8.34
  -4   5  -3  294.11   10.69
  -4   5  -4 1186.07   17.31
  -4   5  -4 1251.26   23.35
  -4   5  -5  122.53    8.01
  -4   5  -6  310.85   13.18
  -4   5  -7  599.04   18.87
  -4   5  -8  917.52   23.83
  -4   5  -8  970.51   25.11
  -4   5  -8  947.83   25.15
  -4   5  -9   16.17    3.40
  -4   5  -9    7.04    2.95
   4  -5   9    6.23    3.44
  -4   5  -9   16.00    3.99
  -4   5 -10  206.88   11.14
   4  -5  10  218.48   12.18
  -4   5 -10  209.72   12.40
   4  -5  11    4.86    2.43
  -4   5 -11    4.70    2.59
   4  -5  12   35.38    4.90
  -4   5 -12   35.00    5.27
   4  -5  13    5.71    2.53
   4  -5  14  112.07    6.56
   4  -5  15   36.34    2.74
  -4   5 -15   44.28    3.66
  -4   4  16   78.14    4.68
  -4   4  15   47.24    3.99
  -4   4  15   41.50    4.32
  -4   4  14   13.12    2.85
  -4   4  14   12.81    3.21
  -4   4  13    8.20    2.70
  -4   4  13    4.46    2.79
  -4   4  12  154.42    9.60
  -4   4  12  135.51    9.71
  -4   4  11  213.65   11.95
  -4   4  10  283.24   15.28
  -4   4  10  267.61   13.44
  -4   4   9   19.31    4.17
  -4   4   8   34.22    4.81
  -4   4   7   71.06    6.43
  -4   4   6   36.97    4.27
  -4   4   5 2165.66   29.34
  -4   4   4  760.62   16.12
  -4   4   3  418.30   11.08
  -4   4   2 1432.45   16.64
  -4   4   2 1416.85   19.65
  -4   4   1    6.35    1.44
  -4   4   1    7.97    1.87
  -4   4   0 1190.48   15.86
  -4   4   0 1217.74   17.60
  -4   4   0 1193.35   16.97
  -4   4  -1  752.84   14.36
  -4   4  -1  736.98   12.02
  -4   4  -1  778.71   14.29
  -4   4  -1  785.54   11.18
  -4   4  -2 1436.17   16.41
  -4   4  -2 1479.43   21.28
  -4   4  -3 2747.29   22.55
  -4   4  -3 2821.67   31.46
  -4   4  -4  105.16    6.02
  -4   4  -4  106.60    6.55
  -4   4  -5  733.21   17.33
  -4   4  -5  694.23   17.63
  -4   4  -6   28.55    3.91
  -4   4  -6   30.23    4.23
  -4   4  -7   16.81    3.63
  -4   4  -8  453.01   16.91
  -4   4  -8  476.10   17.60
   4  -4   9  297.81   14.11
  -4   4  -9  309.29   14.52
  -4   4  -9  315.02   14.68
  -4   4  -9  294.76   13.27
   4  -4  10   12.47    3.57
  -4   4 -10   12.89    3.85
  -4   4 -11    5.57    2.71
   4  -4  11    8.25    3.24
   4  -4  12  119.97    8.92
   4  -4  13    3.05    2.43
   4  -4  14  258.32   10.26
   4  -4  15  514.56   11.21
  -4   3  16  162.55    7.22
  -4   3  16  171.42    7.41
  -4   3  15    6.68    2.37
  -4   3  15   11.92    2.60
  -4   3  14   51.18    5.23
  -4   3  14   47.91    5.28
  -4   3  13  109.29    8.42
  -4   3  13  101.15    8.33
  -4   3  12  197.05   11.22
  -4   3  12  196.58   11.54
  -4   3  11  163.84   10.13
  -4   3  11  170.74   11.73
  -4   3  11  169.86   10.78
  -4   3  10  327.11   14.34
  -4   3  10  310.62   15.15
  -4   3   9   76.63    7.28
  -4   3   8   28.77    4.09
  -4   3   7  744.46   18.96
  -4   3   6  449.86   10.43
  -4   3   6  415.54   13.14
  -4   3   5  415.59   12.15
  -4   3   5  400.58    9.30
  -4   3   4 2873.25   23.76
  -4   3   4 2980.26   29.40
  -4   3   3  324.68    7.82
  -4   3   3  332.97    9.22
  -4   3   2 2559.83   24.62
  -4   3   1 2558.08   23.61
  -4   3   1 2348.55   12.17
  -4   3   0 1698.11   19.44
  -4   3   0 1664.37   19.38
  -4   3  -1 4059.84   31.12
  -4   3  -1 3950.23   24.80
  -4   3  -1 4022.93   31.54
  -4   3  -1 4013.53   20.90
  -4   3  -2  853.05   15.65
  -4   3  -2  850.07   10.81
  -4   3  -2  848.16   13.50
  -4   3  -3  557.96   12.44
  -4   3  -3  544.41   13.35
  -4   3  -4  144.68    7.04
  -4   3  -4  138.37    7.24
  -4   3  -5  312.58   11.18
  -4   3  -5  289.65   11.08
  -4   3  -6  111.15    7.23
  -4   3  -6  104.88    7.27
  -4   3  -7  515.47   16.73
  -4   3  -7  497.23   16.63
  -4   3  -8   76.68    7.16
  -4   3  -8   86.95    7.45
   4  -3   9   52.44    6.50
  -4   3  -9   51.49    5.98
  -4   3  -9   49.90    6.09
   4  -3  10    3.68    2.86
  -4   3 -10    4.65    2.92
   4  -3  11  206.96   12.17
   4  -3  12  272.64   13.29
   4  -3  13  513.22   16.76
   4  -3  14  211.05    9.40
   4  -3  15  116.44    5.47
  -4   2  17  158.60    6.73
  -4   2  16    0.90    2.10
  -4   2  16    2.96    1.37
  -4   2  15    7.34    2.47
  -4   2  15    9.35    2.84
  -4   2  14    4.99    2.68
  -4   2  14    6.16    3.05
  -4   2  13    4.83    2.73
  -4   2  13    1.13    2.40
  -4   2  12  233.48   12.26
  -4   2  12  222.31   13.26
  -4   2  12  211.28   11.44
  -4   2  12  224.88   12.61
  -4   2  11  681.03   22.23
  -4   2  11  640.42   20.27
  -4   2  11  649.80   19.88
  -4   2  10   10.49    3.11
  -4   2   9   41.36    5.17
  -4   2   8  194.33    9.99
  -4   2   8  192.82    8.13
  -4   2   7  155.34    8.28
  -4   2   7  158.15    7.00
  -4   2   6 3040.81   28.31
  -4   2   6 2885.84   32.17
  -4   2   5 1029.38   17.65
  -4   2   5 1011.32   15.34
  -4   2   4 1406.59   17.10
  -4   2   4 1366.30   18.68
  -4   2   3 2588.35   22.27
  -4   2   3 2604.80   23.83
  -4   2   2 1607.64   17.22
  -4   2   2 1603.23   18.12
  -4   2   1 7535.52   38.06
  -4   2   0   16.36    2.06
  -4   2   0   15.49    1.58
  -4   2  -1  200.92    5.84
  -4   2  -1  205.27    6.73
  -4   2  -1  202.06    6.97
  -4   2  -1  190.58    3.09
  -4   2  -2  588.88   11.36
  -4   2  -2  587.88   12.51
  -4   2  -3    4.46    1.58
  -4   2  -3    4.40    1.80
  -4   2  -4  600.78   14.58
  -4   2  -4  583.05   14.11
  -4   2  -5  473.72   13.84
  -4   2  -5  472.24   13.70
  -4   2  -6  198.61    9.70
  -4   2  -6  194.17    9.61
  -4   2  -7  356.59   13.95
  -4   2  -7  340.17   13.46
  -4   2  -8   48.83    5.66
   4  -2   8   42.60    5.74
  -4   2  -8   48.26    5.50
  -4   2  -9    3.33    2.44
  -4   2  -9    1.39    1.96
  -4   2  -9   -0.30    1.99
   4  -2  10   19.23    4.23
   4  -2  11   31.74    5.45
   4  -2  12   56.83    6.65
   4  -2  13  246.77   11.65
   4  -2  14  568.18   14.96
   4  -2  15    4.26    1.35
  -4   1  18   21.83    2.34
  -4   1  17   19.33    3.14
  -4   1  16   77.19    6.39
  -4   1  15   39.56    5.11
  -4   1  15   31.62    4.10
  -4   1  14  100.14    8.38
  -4   1  14   92.61    7.32
  -4   1  13   70.88    7.12
  -4   1  13   69.96    6.61
  -4   1  13   76.23    7.31
  -4   1  12   13.34    4.03
  -4   1  12   13.54    3.59
  -4   1  12   15.27    3.79
  -4   1  11  331.20   15.09
  -4   1  11  332.76   14.38
  -4   1  10  317.74   13.92
  -4   1  10  332.33   12.31
  -4   1   9    8.54    2.16
  -4   1   9    8.15    2.53
  -4   1   8 1778.90   25.56
  -4   1   8 1729.10   28.07
  -4   1   7 1527.99   24.10
  -4   1   7 1552.84   22.33
  -4   1   6  829.10   15.34
  -4   1   6  879.41   16.69
  -4   1   5 2154.71   23.84
  -4   1   5 2043.35   22.50
  -4   1   4   20.43    2.32
  -4   1   4   18.49    2.18
  -4   1   3 3140.38   25.01
  -4   1   3 3064.52   23.98
  -4   1   2 2116.94   19.23
  -4   1   2 2051.89   19.64
  -4   1   1 1646.99   17.70
  -4   1   1 1675.74   16.78
  -4   1   0   17.41    1.84
  -4   1   0   18.99    2.00
  -4   1  -1    3.44    1.11
  -4   1  -2  307.35    8.50
  -4   1  -2  323.53    9.32
  -4   1  -3  318.55    9.77
  -4   1  -3  308.20    9.41
  -4   1  -4  402.24   11.72
  -4   1  -4  400.16   11.79
  -4   1  -5 1551.80   25.42
  -4   1  -5 1603.61   25.15
  -4   1  -6  228.70   10.49
  -4   1  -6  238.62   10.48
  -4   1  -7    8.74    2.58
  -4   1  -7   15.98    3.19
  -4   1  -8  505.11   17.06
   4  -1   8  462.49   17.68
  -4   1  -8  473.96   17.12
   4  -1   9  217.02   12.71
  -4   1  -9  213.21   12.08
  -4   1  -9  189.29   10.81
   4  -1  10  421.67   17.64
   4  -1  11  774.85   23.44
   4  -1  12  407.50   16.16
   4  -1  13    6.03    2.80
   4  -1  14  312.30   10.62
   4  -1  15   18.55    1.98
  -4   0  18  107.96    5.62
  -4   0  17   53.35    4.92
  -4   0  16   79.85    6.84
  -4   0  15    4.39    3.05
  -4   0  14  287.27   14.12
  -4   0  13  374.43   15.79
  -4   0  13  375.53   16.17
  -4   0  12  794.72   23.42
  -4   0  12  800.80   22.63
  -4   0  11  492.16   15.93
  -4   0  11  527.67   18.24
  -4   0  10  776.88   19.31
  -4   0  10  817.61   21.07
  -4   0   9   65.71    5.42
  -4   0   9   65.82    5.72
  -4   0   8 1222.54   22.34
  -4   0   8 1180.03   21.23
  -4   0   7 3156.29   32.52
  -4   0   7 3131.28   32.69
  -4   0   6  316.05    9.78
  -4   0   6  310.73    9.39
  -4   0   5 1401.91   19.22
  -4   0   5 1439.49   18.14
  -4   0   4 1127.67   16.23
  -4   0   4 1163.56   14.81
  -4   0   3  474.09   10.08
  -4   0   3  470.09    8.67
  -4   0   2 3172.31   21.40
  -4   0   2 3333.83   25.49
  -4   0   1   34.15    2.33
  -4   0   1   28.45    2.55
  -4   0   0 1689.70   18.31
  -4   0  -1  509.68   10.76
  -4   0  -2    3.00    1.49
  -4   0  -2    1.54    1.30
  -4   0  -3  100.17    5.70
  -4   0  -3  103.21    5.62
  -4   0  -4  810.62   16.75
  -4   0  -4  768.88   16.85
  -4   0  -5   25.33    3.56
  -4   0  -5   27.92    3.79
  -4   0  -6   39.49    4.85
  -4   0  -6   44.76    4.67
  -4   0  -7    2.91    1.68
  -4   0  -7    1.04    2.00
  -4   0  -8   38.90    4.90
   4   0   8   37.07    5.33
  -4   0  -8   44.82    5.60
   4   0   8   34.93    4.86
   4   0   9   29.26    5.14
   4   0  10 1653.10   34.76
   4   0  11   57.59    6.56
   4   0  12 1097.11   25.30
   4   0  13   84.59    6.35
   4   0  14   49.27    3.93
  -4  -1  18    6.37    1.88
  -4  -1  17  222.87   10.15
  -4  -1  16   18.26    4.13
  -4  -1  15  433.85   16.93
  -4  -1  14  342.70   15.58
  -4  -1  14  346.49   14.99
  -4  -1  13   87.89    8.03
  -4  -1  13  100.40    8.05
  -4  -1  12    8.32    2.29
  -4  -1  12    4.92    2.63
  -4  -1  12    7.91    2.35
  -4  -1  11  851.26   21.63
  -4  -1  11  951.79   23.30
  -4  -1  10  102.72    7.36
  -4  -1  10   85.10    6.69
  -4  -1   9 2772.72   35.47
  -4  -1   9 2940.14   35.87
  -4  -1   8   78.53    5.50
  -4  -1   8   73.21    5.61
  -4  -1   7  717.85   16.07
  -4  -1   7  785.40   15.46
  -4  -1   6  401.68   11.33
  -4  -1   6  382.93    9.74
  -4  -1   5  331.17    9.71
  -4  -1   5  323.92    8.01
  -4  -1   4 3790.19   30.98
  -4  -1   4 3726.22   24.02
  -4  -1   3  498.28    8.03
  -4  -1   3  529.34   11.05
  -4  -1   2  788.05    9.55
  -4  -1   2  844.12   13.38
  -4  -1   1  435.44    9.50
  -4  -1   0   52.50    3.66
  -4  -1   0   52.23    3.42
  -4  -1  -1  801.85   14.59
  -4  -1  -2  221.94    8.34
  -4  -1  -2  208.41    7.58
  -4  -1  -3   26.42    3.32
  -4  -1  -3   27.42    3.12
  -4  -1  -4   66.80    4.93
  -4  -1  -4   73.36    5.66
  -4  -1  -5  399.01   12.66
  -4  -1  -5  369.08   13.43
  -4  -1  -6    6.67    2.22
  -4  -1  -6    8.26    2.74
   4   1   7   40.68    5.37
  -4  -1  -7   34.63    4.79
   4   1   7   35.41    4.86
   4   1   8   56.86    6.74
  -4  -1  -8   63.46    6.83
   4   1   8   58.15    6.45
   4   1   9  155.75   10.86
   4   1  10  636.40   21.25
   4   1  11  595.53   19.45
   4   1  12   74.26    6.53
   4   1  13  492.25   13.60
   4   1  14   28.89    2.56
   4   1  14   24.12    2.24
  -4  -2  19  104.15    4.49
  -4  -2  18   -1.15    1.39
  -4  -2  17   20.19    3.51
  -4  -2  16  196.56   10.84
  -4  -2  15    8.71    3.41
  -4  -2  14  249.15   12.31
  -4  -2  14  252.41   13.30
  -4  -2  13  398.50   16.68
  -4  -2  13  394.79   15.53
  -4  -2  13  371.94   15.71
   4   2 -12  171.60   10.29
  -4  -2  12  158.52   10.06
  -4  -2  12  161.44    9.88
  -4  -2  12  162.42    9.90
  -4  -2  11 1293.67   26.40
  -4  -2  11 1276.85   27.26
  -4  -2  10  780.71   20.46
  -4  -2  10  844.29   19.89
  -4  -2   9 1854.35   29.77
  -4  -2   9 1945.13   27.78
  -4  -2   8 3826.93   40.40
  -4  -2   8 4083.55   36.59
  -4  -2   7  471.39   13.56
  -4  -2   7  499.25   11.67
  -4  -2   6  631.43   14.65
  -4  -2   6  640.22   11.65
  -4  -2   5   27.22    2.15
  -4  -2   5   28.14    3.21
  -4  -2   4  248.45    8.34
  -4  -2   4  248.27    5.36
  -4  -2   3 1740.57   12.11
  -4  -2   3 1830.67   21.22
  -4  -2   2  280.18    8.05
  -4  -2   1 1234.78   16.54
  -4  -2   0  709.82   12.74
  -4  -2   0  715.19   14.27
  -4  -2  -1    0.01    1.23
  -4  -2  -2  424.84   12.37
  -4  -2  -2  408.22   10.93
  -4  -2  -3  101.59    5.78
  -4  -2  -3  102.38    6.53
  -4  -2  -4   48.53    4.31
  -4  -2  -4   47.50    5.01
  -4  -2  -5   34.64    3.89
  -4  -2  -5   41.00    4.89
  -4  -2  -6  915.61   23.82
   4   2   7  252.81   13.23
  -4  -2  -7  271.76   13.63
   4   2   7  251.39   12.82
   4   2   8  395.05   16.95
   4   2   8  386.63   15.90
   4   2   9  935.55   25.82
   4   2  10   13.06    3.63
   4   2  11  434.49   15.63
   4   2  12  193.45    9.12
   4   2  13  146.37    6.28
   4   2  13  164.39    6.91
  -4  -3  19   13.75    1.86
  -4  -3  18   51.93    4.36
  -4  -3  17    1.16    2.21
  -4  -3  16   56.02    5.89
  -4  -3  15 1056.14   26.04
   4   3 -15 1026.84   23.35
  -4  -3  14   13.91    3.96
   4   3 -14   16.50    3.84
  -4  -3  14   16.19    3.49
   4   3 -13  590.14   19.58
  -4  -3  13  571.39   18.15
  -4  -3  13  629.15   20.54
   4   3 -12  166.32   10.34
  -4  -3  12  171.16   10.69
  -4  -3  12  150.72    9.28
  -4  -3  11  766.53   21.78
  -4  -3  11  758.31   19.55
  -4  -3  10 1115.58   22.10
  -4  -3  10 1031.58   24.35
  -4  -3   9   15.61    3.22
  -4  -3   9   16.29    2.47
  -4  -3   8 1526.11   26.54
  -4  -3   8 1523.81   21.35
  -4  -3   7 1172.81   22.03
  -4  -3   7 1138.58   16.27
  -4  -3   6  506.40   13.68
  -4  -3   5 1136.25   19.38
  -4  -3   4   14.29    2.23
  -4  -3   3  148.80    6.45
  -4  -3   2  928.37   15.13
  -4  -3   1  165.22    6.37
  -4  -3   0   94.31    5.73
  -4  -3  -1   48.09    4.30
  -4  -3  -2   38.87    4.25
  -4  -3  -2   40.21    3.54
  -4  -3  -3   17.88    2.59
  -4  -3  -3   15.44    3.15
  -4  -3  -4  718.93   19.46
  -4  -3  -5  632.97   19.53
   4   3   6  161.66   10.47
  -4  -3  -6  178.47   11.00
   4   3   6  162.33   10.39
   4   3   7  700.25   22.09
   4   3   7  693.81   21.72
   4   3   8  353.15   15.74
   4   3   8  358.89   15.66
   4   3   9  877.83   24.17
   4   3  10  211.70   11.12
   4   3  11    0.17    1.77
   4   3  12  280.18    9.01
   4   3  12  307.20   10.46
  -4  -4  18   43.19    3.81
  -4  -4  17  301.76   11.44
   4   4 -17  299.10    9.97
  -4  -4  16   58.90    5.97
   4   4 -16   62.44    5.52
  -4  -4  15  365.56   15.03
   4   4 -15  356.69   14.38
  -4  -4  14  861.21   23.61
  -4  -4  13  187.75   11.30
   4   4 -13  218.58   12.36
   4   4 -12  857.44   23.95
  -4  -4  12  869.78   24.74
   4   4 -11   -0.22    1.87
  -4  -4  11    6.22    2.53
  -4  -4  10  323.30   14.15
  -4  -4   9 1297.63   26.87
  -4  -4   8   79.82    6.47
  -4  -4   7  913.14   20.26
  -4  -4   6  150.96    7.95
  -4  -4   5 1965.68   26.73
  -4  -4   4  985.42   17.83
  -4  -4   3  542.00   12.67
  -4  -4   2  290.83    8.86
  -4  -4   1   70.65    4.31
  -4  -4   1   71.10    5.29
  -4  -4   0    4.45    1.94
  -4  -4  -1  188.65    9.08
  -4  -4  -2   71.59    6.06
  -4  -4  -3  344.33   13.51
  -4  -4  -4   60.95    6.16
   4   4   5  856.21   23.23
  -4  -4  -5  918.90   24.63
   4   4   5  897.47   24.06
   4   4   6  110.45    8.72
   4   4   6  113.06    9.09
   4   4   7  677.81   21.45
   4   4   7  689.39   21.85
   4   4   8  314.08   14.35
   4   4   9   76.46    6.81
   4   4  10  221.88    9.97
   4   4  10  245.62   11.78
   4   4  11  100.77    5.47
   4   4  11  116.68    6.98
   4   4  12   69.57    4.13
  -4  -5  18    0.86    1.03
  -4  -5  17  148.38    7.59
   4   5 -17  141.74    7.29
  -4  -5  16 1015.62   22.05
   4   5 -16  997.46   22.04
  -4  -5  15    9.92    3.13
   4   5 -15   11.80    3.23
  -4  -5  14  682.95   20.54
   4   5 -13   64.83    7.27
  -4  -5  13   75.97    7.30
   4   5 -12 1412.28   31.33
  -4  -5  12 1380.28   31.97
   4   5 -11  998.58   25.69
  -4  -5  11  984.45   26.29
  -4  -5  10    9.67    3.02
  -4  -5   9  164.52   10.07
  -4  -5   8  821.47   21.06
  -4  -5   7  108.41    7.47
  -4  -5   6  824.96   18.98
  -4  -5   5   87.70    5.92
  -4  -5   4  747.41   16.10
  -4  -5   3   63.48    4.52
   4   5  -2  279.71    8.41
  -4  -5   2  294.61    9.22
  -4  -5   1  328.43    9.36
  -4  -5   1  305.99   11.41
  -4  -5   0  384.26   13.16
  -4  -5  -1   26.20    4.02
  -4  -5  -2   15.84    3.14
  -4  -5  -3  628.49   19.21
   4   5   3  607.17   18.89
  -4  -5  -4  663.04   20.79
   4   5   4  643.31   20.34
   4   5   5  237.86   12.83
   4   5   6  733.54   22.70
   4   5   7  229.81   13.83
   4   5   8  754.67   23.47
   4   5   9  301.44   13.49
   4   5  10    4.01    2.33
   4   5  11  120.37    5.84
   4   6 -18   79.59    4.17
  -4  -6  17   30.29    3.10
   4   6 -17   28.96    3.51
  -4  -6  16  337.43   11.82
   4   6 -16  337.42   12.89
  -4  -6  15  721.11   19.11
   4   6 -15  681.48   19.98
   4   6 -14  519.44   18.73
  -4  -6  14  550.16   17.67
   4   6 -13  644.31   21.47
   4   6 -12   10.74    3.64
   4   6 -11  944.95   25.62
  -4  -6  11  977.67   26.91
   4   6 -10  217.30   12.02
  -4  -6  10  215.00   12.31
  -4  -6   9   21.68    3.84
  -4  -6   8  296.81   13.34
  -4  -6   7   21.10    3.91
  -4  -6   6 1098.04   22.70
  -4  -6   5  299.34   11.14
  -4  -6   4   17.73    2.88
  -4  -6   3   42.98    3.91
   4   6  -3   51.32    4.18
  -4  -6   2  173.69    9.11
  -4  -6   1  178.43    9.27
  -4  -6   0    7.86    2.51
  -4  -6  -1 1058.69   24.32
  -4  -6  -2  354.68   14.62
   4   6   2  354.22   15.80
  -4  -6  -3   60.34    6.27
   4   6   3   73.81    7.99
   4   6   4  615.60   22.49
   4   6   5    4.84    3.30
   4   6   6  521.03   20.74
   4   6   7  268.05   14.14
   4   6   8   49.52    6.00
   4   6   9  389.91   13.47
   4   6  10   17.87    2.55
   4   7 -18  404.61    8.96
   4   7 -17  267.18    9.62
   4   7 -16   12.03    3.00
   4   7 -15  327.67   13.72
   4   7 -14    8.62    3.24
   4   7 -14    5.86    2.75
   4   7 -13  646.46   21.34
   4   7 -12  753.33   23.24
   4   7 -11    3.80    2.95
  -4  -7  10   26.45    4.86
   4   7 -10   36.36    5.25
   4   7  -9   12.04    3.53
  -4  -7   9   11.88    3.79
   4   7  -9   13.16    3.40
   4   7  -8  408.59   16.14
  -4  -7   8  399.54   15.77
   4   7  -8  387.86   15.16
  -4  -7   7 1356.73   27.32
  -4  -7   6   71.46    6.15
   4   7  -5   71.93    6.10
   4   7  -4   23.20    3.55
  -4  -7   3   81.46    6.70
  -4  -7   2   81.72    6.72
  -4  -7   1  344.81   13.78
   4   7  -1  333.19   14.11
   4   7   0 1282.36   28.58
  -4  -7   0 1194.32   26.47
  -4  -7  -1  322.39   13.97
   4   7   1  345.67   15.61
   4   7   2  510.51   19.64
   4   7   3    4.67    2.74
   4   7   4  323.40   16.38
   4   7   5  223.79   13.52
   4   7   6   30.43    5.33
   4   7   7  621.47   19.40
   4   7   8  372.81   13.12
   4   7   9  209.71    8.02
   4   7   9  202.88    7.55
   4   8 -17  418.54   11.16
   4   8 -16    4.05    2.19
   4   8 -15    4.13    2.41
   4   8 -14   22.84    3.36
   4   8 -14   29.58    4.67
   4   8 -14   24.45    4.38
   4   8 -13  254.24   13.04
   4   8 -12  582.62   20.19
   4   8 -11  424.33   17.42
   4   8 -10  222.30   12.65
   4   8  -9  770.07   23.24
   4   8  -9  804.11   23.29
   4   8  -8   41.73    5.67
   4   8  -8   34.56    5.38
   4   8  -7  149.72   10.13
   4   8  -7  165.67   10.12
   4   8  -7  131.49    9.78
   4   8  -6    6.24    2.49
   4   8  -6    4.67    2.47
   4   8  -6    5.57    3.00
   4   8  -5    8.96    2.65
   4   8  -5   13.03    3.05
   4   8  -5    8.16    2.49
  -4  -8   4   41.84    4.97
   4   8  -4   46.76    5.22
  -4  -8   3    7.15    2.89
   4   8  -3    2.08    1.79
  -4  -8   2   20.27    4.08
   4   8  -2   21.30    4.08
  -4  -8   1   14.28    3.49
   4   8  -1   15.59    3.51
   4   8   0 1505.05   32.37
   4   8   0 1453.24   30.25
   4   8   1  166.61   11.26
   4   8   1  163.78   10.47
   4   8   2  240.98   13.74
   4   8   2  230.78   12.63
   4   8   3  147.34   11.08
   4   8   4   36.93    5.52
   4   8   5  198.36   11.75
   4   8   6  447.99   15.99
   4   8   6  411.34   14.30
   4   8   7   26.55    3.71
   4   8   7   28.86    3.54
   4   8   8  686.23   13.95
   4   8   8  552.85   10.94
   4   9 -17  170.06    6.35
   4   9 -16  116.23    6.57
   4   9 -15   25.95    3.88
   4   9 -14  330.42   11.69
   4   9 -14  338.29   13.44
   4   9 -14  335.26   13.72
   4   9 -13 1093.76   23.69
   4   9 -13 1109.45   25.70
   4   9 -13 1086.86   26.40
   4   9 -12    3.57    2.57
   4   9 -11  505.41   18.66
   4   9 -10   14.98    3.88
   4   9  -9  181.40   11.47
   4   9  -9  202.16   12.02
   4   9  -8   14.88    3.50
   4   9  -8   13.70    4.54
   4   9  -7   85.09    8.05
   4   9  -7   82.36    7.58
   4   9  -6  152.51   10.65
   4   9  -6  164.52   10.34
   4   9  -5   97.91    8.67
   4   9  -5  108.09    8.22
   4   9  -4  100.67    8.08
   4   9  -4  112.84    9.05
   4   9  -3  181.47   10.99
   4   9  -2   90.22    7.84
   4   9  -1  368.75   15.97
   4   9   0   14.79    4.14
   4   9   1  464.92   18.56
   4   9   2   80.26    8.00
   4   9   2   86.62    7.51
   4   9   3  665.49   19.59
   4   9   3  717.15   22.32
   4   9   4  377.67   13.91
   4   9   4  395.20   15.75
   4   9   5  107.92    7.68
   4   9   5  102.39    6.51
   4   9   6  327.93   11.35
   4   9   7  194.56    6.98
   4  10 -16  319.27    9.09
   4  10 -15   66.62    3.95
   4  10 -15   77.67    5.50
   4  10 -14   13.29    2.54
   4  10 -14   17.03    3.31
   4  10 -13  193.52    9.65
   4  10 -13  176.50    9.63
   4  10 -13  192.44   10.40
   4  10 -12  157.25    9.74
   4  10 -12  170.29   10.45
   4  10 -11    7.28    2.92
   4  10 -11    5.98    3.34
   4  10 -10   66.76    6.93
   4  10  -9  105.36    8.78
   4  10  -9  114.84    8.79
   4  10  -8   19.29    4.19
   4  10  -8   17.97    4.41
   4  10  -7    9.92    3.34
   4  10  -7    8.88    3.12
   4  10  -6  486.44   18.92
   4  10  -6  447.16   16.87
   4  10  -5    7.21    3.37
   4  10  -5    5.91    3.09
   4  10  -4  245.86   13.62
   4  10  -4  231.72   12.38
   4  10  -3   84.94    7.84
   4  10  -3   91.80    7.98
   4  10  -2  145.20   10.27
   4  10  -1  470.33   17.87
   4  10   0  168.33   10.99
   4  10   1  111.90    8.81
   4  10   2  309.74   13.86
   4  10   3   75.39    6.67
   4  10   4  720.84   17.95
   4  10   5   84.08    5.41
   4  11 -15  210.23    6.96
   4  11 -14   52.09    3.90
   4  11 -14   54.61    4.40
   4  11 -13    1.06    1.63
   4  11 -13    2.54    1.63
   4  11 -12   50.79    5.35
   4  11 -12   52.28    5.11
   4  11 -12   60.17    5.58
   4  11 -11    3.39    2.57
   4  11 -11    0.79    1.14
   4  11 -10  246.07   11.98
   4  11  -9   73.37    6.85
   4  11  -9   75.81    7.18
   4  11  -8   14.86    3.72
   4  11  -8   12.62    3.57
   4  11  -7  485.88   18.11
   4  11  -7  477.41   17.12
   4  11  -6  144.64   10.05
   4  11  -6  139.91    9.39
   4  11  -5  126.14    9.40
   4  11  -5  128.99    9.15
   4  11  -4  102.43    8.26
   4  11  -3  650.44   20.11
   4  11  -2  114.28    8.55
   4  11  -1   51.83    5.86
   4  11   0   78.04    7.00
   4  11   1   23.00    3.87
   4  11   2  546.29   15.74
   4  11   3  355.80   11.26
   4  11   4   89.15    4.68
   4  12 -13    6.76    1.54
   4  12 -12   -1.02    1.37
   4  12 -11    2.27    2.06
   4  12 -11    3.12    1.57
   4  12 -10   68.46    6.48
   4  12 -10   72.66    5.63
   4  12  -9   63.26    5.71
   4  12  -8   33.98    4.78
   4  12  -7  109.10    7.85
   4  12  -6   56.15    5.92
   4  12  -5  156.01    9.34
   4  12  -4  126.02    8.34
   4  12  -3  191.75   10.13
   4  12  -2  487.24   15.65
   4  12  -1   39.52    4.63
   4  12   0  195.21    8.98
   4  12   1  214.18    8.55
   4  12   2   22.20    2.45
   4  13 -11   18.89    2.82
   4  13 -10  109.83    6.65
   4  13  -9  649.49   16.91
   4  13  -8    3.80    2.00
   4  13  -7    5.37    2.37
   4  13  -6    8.90    2.30
   4  13  -6    7.65    2.35
   4  13  -5   -0.05    1.68
   4  13  -4  531.90   14.62
   4  13  -3  124.70    6.93
   4  13  -2   73.12    5.05
   4  13  -1  125.28    5.83
  -5  15  -2  222.87    9.94
  -5  15  -3   75.59    6.04
  -5  15  -4   -2.19    1.96
  -5  15  -5   29.10    3.80
  -5  15  -6    9.98    2.27
  -5  14   4  663.76   14.62
  -5  14   3  316.87   11.12
  -5  14   2  239.15   10.04
  -5  14   1  141.32    7.77
  -5  14   1  144.60    8.65
  -5  14   0  109.16    6.48
  -5  14   0  114.37    7.93
  -5  14  -1   78.20    6.93
  -5  14  -2    4.92    2.61
  -5  14  -3  168.52   10.01
  -5  14  -4  173.95   10.16
  -5  14  -5   29.83    4.40
  -5  14  -6   85.31    6.87
  -5  14  -6   84.24    5.58
  -5  14  -7    1.73    1.53
  -5  14  -8   12.80    2.40
  -5  14  -9   11.71    2.03
  -5  13   7  488.53   10.55
  -5  13   6  339.21   10.71
  -5  13   5  105.06    6.93
  -5  13   4  795.08   20.22
  -5  13   3   15.20    3.44
  -5  13   2  686.38   20.28
  -5  13   2  720.80   19.92
  -5  13   1   14.86    3.74
  -5  13   1   20.84    3.91
  -5  13   0   55.26    6.29
  -5  13   0   56.17    5.64
  -5  13  -1   55.17    6.31
  -5  13  -1   62.77    6.99
  -5  13  -2  103.93    8.39
  -5  13  -2  110.58    8.95
  -5  13  -3    4.03    2.42
  -5  13  -4  137.32    8.44
  -5  13  -4  119.34    8.78
  -5  13  -5   44.97    5.24
  -5  13  -5   42.21    5.18
  -5  13  -6   79.78    6.81
  -5  13  -7   10.38    3.03
  -5  13  -8  147.03    8.40
  -5  13  -9   68.98    5.39
  -5  13 -10  153.13    6.78
  -5  12   8  288.57    8.95
  -5  12   7  156.33    7.86
  -5  12   6  770.41   19.59
  -5  12   5   87.55    7.41
  -5  12   4   47.95    6.11
  -5  12   3  321.88   15.33
  -5  12   3  308.17   13.81
  -5  12   2   49.12    6.24
  -5  12   2   43.27    5.70
  -5  12   1  596.48   19.40
  -5  12   1  588.47   20.44
  -5  12   1  595.53   20.46
  -5  12   0   92.05    7.80
  -5  12   0   98.26    8.38
  -5  12   0   94.71    8.66
  -5  12  -1    1.76    1.26
  -5  12  -1    5.98    3.14
  -5  12  -2   24.87    4.46
  -5  12  -3   27.07    4.60
  -5  12  -3   19.09    4.07
  -5  12  -4    0.63    2.05
  -5  12  -4    3.08    1.58
  -5  12  -5    6.40    2.80
  -5  12  -5   10.08    3.41
  -5  12  -6   -0.23    2.22
  -5  12  -6    2.59    1.35
  -5  12  -7   39.97    5.67
  -5  12  -7   30.53    4.25
  -5  12  -8  274.01   12.57
  -5  12  -9  681.86   18.36
  -5  12 -10   26.81    3.72
  -5  12 -11  495.18   12.08
  -5  11  10  464.35    8.82
  -5  11   9    3.48    1.39
  -5  11   8 1276.41   22.99
  -5  11   7  102.90    7.56
  -5  11   6  258.51   12.98
  -5  11   5  216.33   12.62
  -5  11   4   22.62    4.38
  -5  11   4   22.24    4.79
  -5  11   3   81.63    8.23
  -5  11   3   72.97    7.31
  -5  11   3   83.71    7.72
  -5  11   2  209.11   11.55
  -5  11   2  200.96   12.02
  -5  11   2  172.63   11.98
  -5  11   1   28.60    4.67
  -5  11   1   23.02    4.70
  -5  11   1   26.87    4.79
  -5  11   0  632.99   21.18
  -5  11   0  598.53   20.82
  -5  11  -1    6.41    2.52
  -5  11  -1    3.70    1.68
  -5  11  -2   60.20    6.80
  -5  11  -3   15.42    3.86
  -5  11  -3   19.08    4.32
  -5  11  -4  114.73    8.82
  -5  11  -4  106.20    9.28
  -5  11  -5    0.78    2.23
  -5  11  -5    1.76    2.31
  -5  11  -6  389.86   16.69
  -5  11  -6  362.36   16.70
  -5  11  -7  346.81   15.58
  -5  11  -7  348.27   15.68
  -5  11  -8  236.21   12.51
  -5  11  -8  220.87   11.41
  -5  11  -9  321.07   13.72
  -5  11 -10   12.05    3.20
  -5  11 -11  450.51   13.11
  -5  11 -12  403.58   10.20
  -5  10  11  183.22    6.91
  -5  10  10  268.76    9.00
  -5  10  10  263.53    9.90
  -5  10   9  487.54   15.05
  -5  10   9  502.65   14.49
  -5  10   8  488.90   16.25
  -5  10   8  458.85   15.73
  -5  10   7  857.85   23.44
  -5  10   7  857.53   22.41
  -5  10   6    6.04    3.27
  -5  10   5   60.08    7.03
  -5  10   5   55.31    6.56
  -5  10   4   21.38    4.39
  -5  10   4   35.59    5.78
  -5  10   4   25.98    4.95
  -5  10   3   51.06    5.72
  -5  10   3   61.60    7.28
  -5  10   3   47.11    6.05
  -5  10   2  477.23   16.89
  -5  10   2  470.70   19.64
  -5  10   2  495.65   18.18
  -5  10   1  431.60   17.11
  -5  10   1  420.44   18.06
  -5  10   0   85.25    7.67
  -5  10   0   75.01    7.25
  -5  10  -1   -1.81    1.73
  -5  10  -2   71.66    6.68
  -5  10  -2   69.70    7.21
  -5  10  -3   15.41    3.74
  -5  10  -3   17.06    3.83
  -5  10  -4   31.77    5.13
  -5  10  -4   23.44    4.92
  -5  10  -5  746.51   23.39
  -5  10  -5  692.43   24.25
  -5  10  -6   -0.89    3.34
  -5  10  -6    4.52    2.61
  -5  10  -6    5.28    3.13
  -5  10  -6    6.32    2.61
  -5  10  -7  231.45   13.04
  -5  10  -7  230.11   15.02
  -5  10  -7  224.72   13.78
  -5  10  -7  225.78   12.25
  -5  10  -8   61.08    6.93
  -5  10  -8   62.49    8.22
  -5  10  -8   66.18    7.32
  -5  10  -8   66.21    6.87
  -5  10  -9   78.41    7.24
  -5  10  -9   67.29    8.44
  -5  10  -9   70.50    6.66
  -5  10 -10  377.21   17.44
  -5  10 -10  398.15   14.90
  -5  10 -11   59.18    6.59
  -5  10 -11   61.85    5.58
  -5  10 -12  269.92   11.24
  -5  10 -12  241.27    8.85
  -5   9  13   93.86    4.17
  -5   9  12  138.35    6.57
  -5   9  11  191.84    7.25
  -5   9  11  195.84    9.10
  -5   9  10   61.45    5.19
  -5   9  10   64.14    5.91
  -5   9   9 1555.34   28.25
  -5   9   9 1546.63   30.15
  -5   9   8  210.49   11.66
  -5   9   8  209.74   11.84
  -5   9   7  329.82   15.31
  -5   9   7  327.24   14.93
  -5   9   6  275.02   13.92
  -5   9   6  277.49   14.45
  -5   9   5  239.79   12.88
  -5   9   5  234.13   13.73
  -5   9   5  264.15   13.04
  -5   9   4  256.89   12.95
  -5   9   4  284.19   13.00
  -5   9   4  290.37   15.88
  -5   9   4  268.98   14.88
  -5   9   3  107.76    8.03
  -5   9   3   91.77    7.57
  -5   9   3  100.83    8.12
  -5   9   3   92.57    8.92
  -5   9   3  112.40    9.50
  -5   9   2   43.51    5.27
  -5   9   2   40.90    5.75
  -5   9   2   46.88    5.44
  -5   9   2   51.59    6.24
  -5   9   1  361.74   16.28
  -5   9   1  358.87   14.78
  -5   9   1  370.90   14.30
  -5   9   1  376.54   15.27
  -5   9   0   75.23    7.01
  -5   9   0   66.05    6.03
  -5   9   0   80.73    6.90
  -5   9   0   70.37    7.00
  -5   9  -1   90.42    7.76
  -5   9  -2   83.17    7.11
  -5   9  -2   94.96    7.59
  -5   9  -2   88.02    7.84
  -5   9  -3  248.31   12.59
  -5   9  -3  230.36   11.49
  -5   9  -3  235.78   13.19
  -5   9  -3  240.96   13.08
  -5   9  -4  185.50   11.45
  -5   9  -4  163.77   11.53
  -5   9  -4  184.13   10.13
  -5   9  -4  183.93   11.90
  -5   9  -5  388.17   16.64
  -5   9  -5  401.47   18.53
  -5   9  -5  356.11   17.49
  -5   9  -5  421.68   16.08
  -5   9  -6 1008.60   27.27
  -5   9  -6 1007.82   25.78
  -5   9  -6  979.68   30.03
  -5   9  -7  164.98   11.31
  -5   9  -7  143.43   11.57
  -5   9  -7  161.21   12.72
  -5   9  -7  159.94   10.56
  -5   9  -8  673.36   21.92
  -5   9  -8  622.23   25.15
  -5   9  -8  615.93   22.98
  -5   9  -8  660.07   21.55
  -5   9  -9   20.76    4.46
  -5   9  -9   16.64    5.24
  -5   9  -9   15.78    4.14
  -5   9  -9   15.13    3.76
  -5   9 -10  198.26   11.03
  -5   9 -10  190.80   11.11
  -5   9 -10  214.39   13.93
  -5   9 -10  198.92   10.85
  -5   9 -11  644.45   21.77
  -5   9 -11  605.02   17.22
  -5   9 -12   22.23    3.90
  -5   9 -12   19.39    3.01
  -5   9 -13  252.92    9.64
  -5   9 -13  200.28    6.37
  -5   8  14  262.67    7.21
  -5   8  13 1095.59   18.66
  -5   8  12  107.45    6.96
  -5   8  11  291.21   10.39
  -5   8  11  298.92   12.67
  -5   8  10    2.89    1.65
  -5   8  10    1.33    2.15
  -5   8   9  184.06   10.50
  -5   8   9  168.89   10.79
  -5   8   8  420.46   17.20
  -5   8   8  441.22   17.06
  -5   8   7  122.52    9.43
  -5   8   7  121.70    9.44
  -5   8   6  297.45   15.36
  -5   8   6  319.57   15.41
  -5   8   6  311.07   14.71
  -5   8   6  325.45   14.20
  -5   8   5  333.61   15.73
  -5   8   5  303.74   14.57
  -5   8   5  328.26   14.17
  -5   8   5  329.54   16.90
  -5   8   5  321.84   13.63
  -5   8   4  205.46   11.31
  -5   8   4  216.64   11.28
  -5   8   4  226.17   13.09
  -5   8   4  236.70   13.63
  -5   8   3  190.81   10.42
  -5   8   3  215.72   12.16
  -5   8   2  132.55    8.34
  -5   8   2  136.72    9.09
  -5   8   1   37.25    4.47
  -5   8   1   40.20    4.85
  -5   8   0   22.53    3.54
  -5   8   0   23.62    3.53
  -5   8  -1   35.57    4.34
  -5   8  -2  131.51    8.02
  -5   8  -3  868.82   20.35
  -5   8  -4 1450.32   30.56
  -5   8  -4 1413.12   32.82
  -5   8  -5   56.08    6.26
  -5   8  -5   65.33    7.88
  -5   8  -5   63.26    7.81
  -5   8  -5   57.53    6.36
  -5   8  -5   56.65    6.71
  -5   8  -6 1459.41   32.15
  -5   8  -6 1458.87   33.57
  -5   8  -6 1410.78   35.83
  -5   8  -6 1372.41   30.23
  -5   8  -7    9.87    3.50
  -5   8  -7    6.60    4.33
  -5   8  -7    2.71    2.87
  -5   8  -8 1027.10   27.22
  -5   8  -8 1002.22   32.30
  -5   8  -8 1040.62   27.47
  -5   8  -8  958.73   29.61
  -5   8  -9   41.80    5.85
  -5   8  -9   46.72    6.69
  -5   8  -9   41.13    6.97
  -5   8  -9   40.88    5.70
  -5   8 -10   23.10    4.48
  -5   8 -10   32.33    5.31
  -5   8 -10   22.25    5.88
  -5   8 -10   24.97    4.56
  -5   8 -11   72.94    8.13
  -5   8 -11   64.37    5.99
  -5   8 -11   58.45    5.76
  -5   8 -12  418.29   16.04
  -5   8 -12  387.47   12.23
  -5   8 -13   16.98    3.12
  -5   8 -14  587.36   12.03
  -5   7  15  582.46   10.26
  -5   7  14  148.66    6.92
  -5   7  13  542.09   15.30
  -5   7  12  164.80    9.51
  -5   7  11  596.36   16.15
  -5   7  11  603.59   19.27
  -5   7  10  469.05   15.87
  -5   7  10  456.02   17.53
  -5   7   9  433.68   17.36
  -5   7   9  437.89   16.28
  -5   7   8   20.58    4.34
  -5   7   8   30.60    4.72
  -5   7   7  606.42   20.16
  -5   7   7  572.82   21.42
  -5   7   6   92.39    8.12
  -5   7   6   94.27    7.52
  -5   7   6   84.94    7.92
  -5   7   5 1169.98   27.17
  -5   7   4  116.31    8.06
  -5   7   3   52.41    5.34
  -5   7   2  350.80   12.60
  -5   7   2  353.43   13.07
  -5   7   1  133.40    7.71
  -5   7   1  147.94    8.03
  -5   7   0  173.22    8.68
  -5   7   0  178.63    8.27
  -5   7  -1  325.69   11.65
  -5   7  -1  325.05   11.88
  -5   7  -1  332.15   10.78
  -5   7  -2 1168.42   24.60
  -5   7  -2 1108.48   21.07
  -5   7  -3   54.33    5.68
  -5   7  -3   50.35    4.57
  -5   7  -4  464.67   17.19
  -5   7  -5  440.61   16.88
  -5   7  -5  427.86   16.88
  -5   7  -6   40.98    5.52
  -5   7  -6   40.28    5.73
  -5   7  -6   38.91    5.41
  -5   7  -7  974.71   26.23
  -5   7  -7  927.51   25.52
  -5   7  -7  990.65   27.36
  -5   7  -8    2.18    2.56
  -5   7  -8    1.25    2.82
  -5   7  -9  274.69   13.77
  -5   7  -9  279.02   14.31
  -5   7 -10  834.45   24.22
  -5   7 -10  854.82   22.88
  -5   7 -11    7.62    2.88
  -5   7 -11    6.82    3.76
  -5   7 -12  338.27   11.84
  -5   7 -12  368.01   15.60
  -5   7 -12  339.78   11.39
  -5   7 -13   13.83    2.99
  -5   7 -14  172.00    7.11
  -5   6  15  244.74    8.35
  -5   6  14  546.20   14.91
  -5   6  13   25.37    4.14
  -5   6  12  741.36   21.19
  -5   6  11   22.60    4.48
  -5   6  10  608.10   20.32
  -5   6  10  612.22   18.38
  -5   6   9  466.28   16.60
  -5   6   9  412.81   19.02
  -5   6   8   41.20    5.39
  -5   6   8   31.85    5.17
  -5   6   8   25.70    4.37
  -5   6   7  371.31   16.33
  -5   6   6  256.26   12.72
  -5   6   5   66.13    6.17
  -5   6   4   47.02    4.99
  -5   6   3   24.78    3.48
  -5   6   2  410.13   12.81
  -5   6   1    1.54    1.50
  -5   6   1    1.91    1.44
  -5   6   0 1709.30   25.54
  -5   6   0 1698.99   25.22
  -5   6  -1    2.89    1.70
  -5   6  -1    3.33    1.48
  -5   6  -1    2.14    1.61
  -5   6  -1    2.10    1.10
  -5   6  -2 1382.40   21.16
  -5   6  -2 1402.47   25.66
  -5   6  -3  365.00   10.78
  -5   6  -3  376.14   14.01
  -5   6  -4   30.16    4.45
  -5   6  -5  713.58   21.16
  -5   6  -6  287.18   13.74
  -5   6  -6  306.15   14.26
  -5   6  -6  293.29   13.79
  -5   6  -7  421.39   16.96
  -5   6  -7  435.35   17.54
  -5   6  -7  418.39   17.04
  -5   6  -8 1498.64   31.89
  -5   6  -8 1462.92   32.43
  -5   6  -9   15.92    3.88
  -5   6  -9   10.60    3.56
  -5   6 -10  716.44   22.55
  -5   6 -10  704.91   20.61
   5  -6  11  107.92    7.72
  -5   6 -11   85.92    6.85
   5  -6  12  132.19    7.81
  -5   6 -13   73.61    6.25
  -5   6 -14   48.27    4.12
  -5   5  16  313.61    8.43
  -5   5  15   10.89    2.33
  -5   5  14  212.57   10.31
  -5   5  13  222.28   11.54
  -5   5  12  251.66   12.89
  -5   5  11  710.21   21.77
  -5   5  10  104.95    7.63
  -5   5  10  120.44    8.94
  -5   5   9  259.03   12.15
  -5   5   9  249.65   14.26
  -5   5   9  250.99   12.92
  -5   5   8    4.33    2.15
  -5   5   7   70.27    6.80
  -5   5   6   90.50    7.20
  -5   5   5  104.93    7.15
  -5   5   4   91.84    6.36
  -5   5   3  187.31    8.50
  -5   5   2  720.79   14.28
  -5   5   2  698.42   15.61
  -5   5   1  708.64   15.00
  -5   5   1  658.46   14.94
  -5   5   0 2235.54   27.85
  -5   5   0 2209.20   27.39
  -5   5   0 2196.71   22.96
  -5   5  -1 2088.18   28.31
  -5   5  -1 2080.02   27.04
  -5   5  -1 2130.80   21.35
  -5   5  -2  208.44    7.54
  -5   5  -2  207.96    9.40
  -5   5  -3  685.97   17.85
  -5   5  -4  372.58   13.79
  -5   5  -5   86.78    7.15
  -5   5  -6  532.44   18.36
  -5   5  -7   93.41    8.15
  -5   5  -7   83.16    7.77
  -5   5  -7   96.29    8.47
  -5   5  -8 1226.02   28.40
   5  -5   8 1150.47   27.30
  -5   5  -8 1267.58   29.82
  -5   5  -8 1166.89   28.78
   5  -5   9  821.36   23.56
  -5   5  -9  761.71   23.56
  -5   5  -9  830.05   23.08
   5  -5  10  102.26    8.58
  -5   5 -10   91.49    7.54
   5  -5  11   66.03    6.36
   5  -5  12  173.01    9.52
   5  -5  13  150.85    7.76
   5  -5  14  300.38    8.39
  -5   5 -14  345.00   10.54
  -5   4  16  218.55    8.04
  -5   4  15  242.29    9.07
  -5   4  15  258.08   10.53
  -5   4  14   10.77    2.37
  -5   4  14    5.69    2.92
  -5   4  13  636.63   18.37
  -5   4  13  626.81   19.77
  -5   4  12  120.86    9.16
  -5   4  12  138.61    8.86
  -5   4  11  360.92   15.79
  -5   4  11  350.62   14.33
  -5   4  10  928.59   27.12
  -5   4  10  932.31   24.66
  -5   4   9    0.48    2.32
  -5   4   8    7.21    2.75
  -5   4   7   32.29    4.47
  -5   4   6   18.81    3.41
  -5   4   5  408.62   13.00
  -5   4   4  770.55   16.79
  -5   4   3  160.55    7.48
  -5   4   2  137.10    6.58
  -5   4   2  142.27    6.40
  -5   4   1 2063.86   25.15
  -5   4   1 2072.72   24.71
  -5   4   0   80.65    5.17
  -5   4   0   88.53    5.45
  -5   4   0   78.01    3.82
  -5   4  -1 1339.38   21.54
  -5   4  -1 1378.88   21.25
  -5   4  -2 1180.25   21.12
  -5   4  -3  348.88   12.19
  -5   4  -4 1445.45   26.06
  -5   4  -5   73.10    6.37
  -5   4  -6  414.21   15.78
  -5   4  -7 1494.83   30.76
   5  -4   7 1483.68   30.47
  -5   4  -7 1597.39   32.39
  -5   4  -7 1647.08   32.72
  -5   4  -8  113.95    9.12
   5  -4   8  111.90    9.04
  -5   4  -8  104.39    8.82
  -5   4  -8  105.12    8.36
   5  -4   9  543.52   19.56
  -5   4  -9  526.85   17.92
   5  -4  10    3.16    2.92
   5  -4  11  237.54   12.46
   5  -4  12  150.93    9.29
   5  -4  13  172.50    8.58
   5  -4  14   59.60    4.12
  -5   3  17  262.57    6.78
  -5   3  16    4.22    1.71
  -5   3  16    6.61    1.77
  -5   3  15  174.25    8.89
  -5   3  15  176.98    9.24
  -5   3  14  116.59    7.99
  -5   3  14  119.32    8.41
  -5   3  13  167.75   10.39
  -5   3  13  172.44   10.52
  -5   3  12  501.90   18.62
  -5   3  12  499.06   17.54
  -5   3  11  101.23    9.37
  -5   3  11  109.50    8.61
  -5   3  10  698.16   22.50
  -5   3  10  705.78   20.80
  -5   3   9    8.04    2.80
  -5   3   8  469.98   16.49
  -5   3   7   66.35    5.96
  -5   3   6  491.00   14.51
  -5   3   6  515.64   12.57
  -5   3   5 2206.58   28.24
  -5   3   5 2072.13   24.26
  -5   3   4   14.85    2.52
  -5   3   4   23.66    2.66
  -5   3   3  849.05   14.73
  -5   3   3  862.87   16.01
  -5   3   2   23.94    2.68
  -5   3   2   25.04    1.69
  -5   3   1  526.48   11.99
  -5   3   1  511.81    7.99
  -5   3   0  738.46   14.41
  -5   3   0  786.23   11.25
  -5   3   0  754.14   15.01
  -5   3  -1   -1.12    1.26
  -5   3  -1    2.37    1.34
  -5   3  -2 2189.91   27.80
  -5   3  -2 2295.53   25.12
  -5   3  -3  101.16    6.52
  -5   3  -3  107.84    6.08
  -5   3  -4 1232.30   23.43
  -5   3  -4 1294.97   22.70
  -5   3  -5  502.81   15.33
  -5   3  -5  504.31   15.99
  -5   3  -6   -1.78    2.54
  -5   3  -6    2.96    1.81
   5  -3   7  997.29   25.31
  -5   3  -7 1034.19   24.85
  -5   3  -7  996.25   25.55
  -5   3  -7 1032.61   25.66
  -5   3  -8  697.58   21.62
   5  -3   8  709.18   22.18
  -5   3  -8  675.78   20.47
   5  -3   9  298.90   14.75
   5  -3  10   53.41    6.66
   5  -3  11    8.09    3.16
   5  -3  12    3.16    2.80
   5  -3  13   64.58    5.48
   5  -3  14  287.80    8.91
  -5   2  17  265.32    8.85
  -5   2  16  172.74    8.65
  -5   2  16  173.91    7.96
  -5   2  15   97.22    7.35
  -5   2  15   80.74    6.25
  -5   2  14  317.11   13.98
  -5   2  14  337.08   13.86
  -5   2  13    2.57    2.02
  -5   2  13   -0.45    2.61
  -5   2  12  531.00   18.49
  -5   2  12  515.70   18.81
  -5   2  11  657.21   21.82
  -5   2  11  666.62   20.66
  -5   2  10    3.68    2.12
  -5   2   9   83.65    7.28
  -5   2   8   88.31    5.95
  -5   2   8   86.67    6.72
  -5   2   7  481.66   14.53
  -5   2   7  489.84   13.17
  -5   2   6   18.01    2.57
  -5   2   6   16.06    2.83
  -5   2   5 2984.25   29.32
  -5   2   5 3045.88   31.10
  -5   2   4 1268.27   18.52
  -5   2   4 1287.46   18.91
  -5   2   3 2682.69   26.09
  -5   2   3 2812.73   27.26
  -5   2   2  297.84    8.54
  -5   2   2  285.99    8.48
  -5   2   1 1160.30   16.83
  -5   2   1 1134.67   13.56
  -5   2   0   29.47    2.50
  -5   2   0   26.79    2.80
  -5   2  -1 4293.86   31.32
  -5   2  -1 4317.30   36.51
  -5   2  -2   64.75    4.36
  -5   2  -2   64.48    4.78
  -5   2  -3 2165.70   28.73
  -5   2  -3 2118.67   26.76
  -5   2  -4   28.75    3.89
  -5   2  -4   25.74    3.41
  -5   2  -5 2079.11   31.11
  -5   2  -5 2120.26   32.06
  -5   2  -6  365.26   14.01
  -5   2  -6  348.77   13.96
   5  -2   7  132.73    9.45
  -5   2  -7  128.82    8.82
  -5   2  -7  128.85    9.09
  -5   2  -8   50.01    5.72
   5  -2   8   48.80    6.20
  -5   2  -8   46.17    5.93
   5  -2   9  106.49    9.28
   5  -2  10   39.64    5.89
   5  -2  11   74.75    7.45
   5  -2  12   24.03    4.11
   5  -2  13   20.62    3.38
   5  -2  14  139.57    6.07
  -5   1  18  477.84   10.49
  -5   1  17    2.38    1.83
  -5   1  16  573.54   16.92
  -5   1  15    2.08    2.35
  -5   1  15    4.28    2.45
  -5   1  14  721.08   20.03
  -5   1  14  748.23   22.31
  -5   1  14  762.12   22.24
  -5   1  13  225.46   12.49
  -5   1  13  224.81   12.58
  -5   1  12  333.64   15.66
  -5   1  12  335.70   15.01
  -5   1  11   80.06    7.53
  -5   1  11   89.92    7.53
  -5   1  10   14.97    3.51
  -5   1  10   13.84    2.74
  -5   1   9    2.39    1.85
  -5   1   9    2.95    1.62
  -5   1   8   44.93    4.76
  -5   1   8   40.41    4.09
  -5   1   7 1652.54   24.62
  -5   1   7 1763.97   26.24
  -5   1   6  686.58   15.04
  -5   1   6  701.71   15.31
  -5   1   5   34.49    3.40
  -5   1   5   29.53    3.08
  -5   1   4  477.86   10.87
  -5   1   4  469.83   11.43
  -5   1   3  163.58    6.13
  -5   1   3  170.76    6.69
  -5   1   2 4926.87   35.03
  -5   1   2 4846.86   32.31
  -5   1   1  889.43   13.89
  -5   1   1  845.55   13.11
  -5   1   0  104.92    5.05
  -5   1   0  101.93    4.84
  -5   1  -1 2259.57   24.35
  -5   1  -2  447.82   11.62
  -5   1  -2  458.58   12.47
  -5   1  -3 2880.62   32.96
  -5   1  -3 2788.03   31.58
  -5   1  -4 1912.19   28.46
  -5   1  -4 1825.82   27.68
  -5   1  -5  245.17   10.95
  -5   1  -5  236.71   10.91
  -5   1  -6  319.57   13.33
  -5   1  -6  347.07   13.68
   5  -1   7  122.47    9.35
  -5   1  -7  123.61    8.84
  -5   1  -7  124.90    8.94
  -5   1  -8   15.93    3.82
   5  -1   8   19.27    4.17
   5  -1   9   18.93    4.74
   5  -1  10  290.06   14.55
   5  -1  11  502.62   17.94
   5  -1  12  142.06    8.78
   5  -1  13   80.11    5.61
   5  -1  14   25.52    2.38
  -5   0  18  205.28    7.84
  -5   0  17  256.73   10.48
  -5   0  16  437.42   15.44
  -5   0  15  637.08   20.19
  -5   0  14   13.57    3.96
  -5   0  14   13.62    3.30
  -5   0  13    6.45    2.44
  -5   0  12   39.92    5.40
  -5   0  12   31.55    5.00
  -5   0  11  176.97   10.57
  -5   0  11  172.01    9.80
  -5   0  10    9.02    2.45
  -5   0  10   11.47    2.75
  -5   0   9  158.17    8.66
  -5   0   9  175.78    9.26
  -5   0   8  234.16   10.01
  -5   0   8  239.35    9.95
  -5   0   7  304.92   10.30
  -5   0   7  289.61   10.59
  -5   0   6 1798.41   22.97
  -5   0   6 1739.28   24.41
  -5   0   5  981.14   17.51
  -5   0   5  963.68   15.43
  -5   0   4  411.59   10.95
  -5   0   4  420.33    9.51
  -5   0   3 1498.62   16.97
  -5   0   3 1488.86   19.95
  -5   0   2   25.56    2.32
  -5   0   2   22.69    2.67
  -5   0   1 2576.31   25.82
  -5   0   1 2441.84   21.85
  -5   0   0  610.33   12.70
  -5   0  -1 1204.37   18.96
  -5   0  -2  464.04   12.57
  -5   0  -2  475.74   12.85
  -5   0  -3   10.90    2.53
  -5   0  -3    9.22    2.33
  -5   0  -4 1143.09   22.12
  -5   0  -4 1083.11   22.12
  -5   0  -5   95.71    6.94
  -5   0  -5  102.15    7.51
   5   0   6  245.81   12.86
  -5   0  -6  230.06   11.74
  -5   0  -6  265.34   12.03
  -5   0  -7    6.54    2.57
   5   0   7    3.76    2.51
  -5   0  -7    4.35    2.59
   5   0   8   62.64    7.01
   5   0   9  114.93    9.63
   5   0  10  228.72   12.76
   5   0  11  107.55    8.41
   5   0  12   11.46    2.84
   5   0  13   57.86    4.45
  -5  -1  19  251.11    6.70
  -5  -1  18   23.69    3.03
  -5  -1  17  267.28   11.19
  -5  -1  16    1.68    2.67
  -5  -1  15  354.97   14.70
  -5  -1  15  359.30   15.48
  -5  -1  14   34.98    5.68
  -5  -1  14   30.36    4.63
  -5  -1  13   10.14    3.33
  -5  -1  12   93.14    7.61
  -5  -1  12   74.43    7.02
  -5  -1  12   88.74    7.68
  -5  -1  11   33.68    4.40
  -5  -1  11   33.25    4.76
  -5  -1  10  377.98   14.43
  -5  -1  10  414.98   14.48
  -5  -1   9  281.46   11.87
  -5  -1   9  287.00   11.20
  -5  -1   8 3137.97   37.28
  -5  -1   8 3074.03   33.81
  -5  -1   7  396.44   11.02
  -5  -1   7  376.40   12.38
  -5  -1   6   31.69    3.61
  -5  -1   6   27.75    2.76
  -5  -1   5  589.99   14.00
  -5  -1   5  598.48   11.19
  -5  -1   4   63.81    3.39
  -5  -1   4   59.72    4.39
  -5  -1   3 2628.96   27.11
  -5  -1   3 2484.30   19.81
  -5  -1   2 3387.84   30.26
  -5  -1   2 3261.17   22.61
  -5  -1   1  125.78    5.97
  -5  -1   0 1812.11   23.49
  -5  -1  -1   57.88    4.56
  -5  -1  -2 1356.42   23.01
  -5  -1  -2 1446.76   22.67
  -5  -1  -3  166.64    8.58
  -5  -1  -3  163.98    8.15
  -5  -1  -4   10.13    2.48
  -5  -1  -4    9.60    2.34
  -5  -1  -5  349.96   14.25
  -5  -1  -5  351.56   13.11
  -5  -1  -6   47.43    5.66
  -5  -1  -6   42.05    5.15
   5   1   7   -1.28    2.16
   5   1   8   60.78    6.82
   5   1   9  231.57   12.98
   5   1  10   37.69    5.68
   5   1  11  260.90   11.84
   5   1  12  347.82   11.64
   5   1  13    1.21    1.12
  -5  -2  19  167.12    5.77
  -5  -2  18   44.52    4.07
  -5  -2  17  181.67    9.37
  -5  -2  16   87.28    7.58
  -5  -2  15  164.50    9.78
  -5  -2  15  173.08   10.90
  -5  -2  14   41.93    5.01
  -5  -2  14   36.62    5.73
  -5  -2  13   11.23    2.93
   5   2 -12  275.46   12.80
  -5  -2  12  258.66   12.53
  -5  -2  12  283.17   13.66
  -5  -2  12  284.27   13.17
  -5  -2  11   15.62    3.44
  -5  -2  11   12.82    3.35
  -5  -2  10  851.60   22.10
  -5  -2  10  909.14   20.44
  -5  -2   9  651.07   18.52
  -5  -2   9  670.09   16.22
  -5  -2   8  336.10   12.70
  -5  -2   8  330.93   10.49
  -5  -2   7  458.51   14.09
  -5  -2   7  460.77   11.13
  -5  -2   6    6.67    2.16
  -5  -2   6   10.35    1.57
  -5  -2   5  406.74   12.03
  -5  -2   4 1639.29   23.00
  -5  -2   3    0.94    1.47
  -5  -2   2 4677.10   36.68
  -5  -2   1  235.88    8.97
  -5  -2   1  233.69    8.32
  -5  -2   0 1693.01   24.58
  -5  -2  -1  181.12    8.57
  -5  -2  -2  470.96   14.48
  -5  -2  -2  467.51   13.31
  -5  -2  -3  179.59    9.54
  -5  -2  -3  188.48    8.81
  -5  -2  -4  244.72   10.46
  -5  -2  -4  249.15   11.89
   5   2   5   46.87    5.94
  -5  -2  -5   44.48    5.46
   5   2   6  107.83    8.96
  -5  -2  -6  110.53    8.78
   5   2   7    0.84    1.58
   5   2   8   76.95    7.77
   5   2   9   35.64    5.28
   5   2  10  127.53    8.66
   5   2  11   54.96    5.10
   5   2  12   99.16    5.27
   5   2  12  103.28    5.14
  -5  -3  19   40.57    2.94
  -5  -3  18   15.00    2.57
  -5  -3  17    5.42    2.56
  -5  -3  16    6.06    2.87
   5   3 -16    6.94    1.83
  -5  -3  15  368.40   15.42
   5   3 -15  391.25   14.58
  -5  -3  15  366.24   13.94
  -5  -3  14  424.59   17.09
  -5  -3  14  442.35   15.85
   5   3 -13   -2.59    2.45
  -5  -3  13   -0.07    1.95
   5   3 -12   90.53    7.84
  -5  -3  12   84.01    7.74
  -5  -3  12   84.30    7.14
   5   3 -11  436.91   16.23
  -5  -3  11  405.29   16.39
  -5  -3  10   92.95    7.70
  -5  -3   9 1304.10   27.03
  -5  -3   8  904.73   21.49
  -5  -3   7  411.84   13.80
  -5  -3   6 1503.21   25.01
  -5  -3   5  258.70    9.96
  -5  -3   4 2787.08   31.32
  -5  -3   3 1291.99   20.37
  -5  -3   2 1049.77   18.04
  -5  -3   1  366.91   10.59
  -5  -3   1  362.39   11.94
  -5  -3   0  493.02   14.35
  -5  -3  -1  785.07   18.96
  -5  -3  -2   36.12    4.55
  -5  -3  -2   32.79    3.73
  -5  -3  -3  137.01    8.80
   5   3   4  105.58    8.24
  -5  -3  -4  107.77    8.31
   5   3   5  221.04   12.32
  -5  -3  -5  241.77   12.98
   5   3   6    2.41    2.47
   5   3   7  138.48   10.04
   5   3   8   51.23    6.11
   5   3   9  182.35   10.25
   5   3  10   19.75    3.44
   5   3  10   22.32    3.55
   5   3  11  434.21   11.28
   5   3  11  465.55   12.19
  -5  -4  18    5.22    1.66
  -5  -4  17   56.31    5.08
   5   4 -17   58.62    4.55
  -5  -4  16  193.39   10.19
   5   4 -16  204.12    9.95
  -5  -4  15   28.97    4.83
   5   4 -15   34.93    4.74
   5   4 -14   34.41    5.45
  -5  -4  14   37.33    5.36
   5   4 -13   23.21    4.60
   5   4 -12   53.93    6.18
  -5  -4  12   47.93    6.16
   5   4 -11 1140.10   27.02
  -5  -4  11 1109.69   27.78
  -5  -4  10  810.65   22.96
  -5  -4   9  478.78   17.04
  -5  -4   8 1156.65   25.11
  -5  -4   7   65.24    5.85
  -5  -4   6 1779.37   28.20
  -5  -4   5  599.40   15.66
  -5  -4   4  169.73    8.04
  -5  -4   3  925.13   17.92
  -5  -4   2   82.82    5.40
  -5  -4   1  821.46   16.38
  -5  -4   1  795.25   18.94
  -5  -4   0  200.44    9.87
  -5  -4  -1   50.42    5.41
  -5  -4  -1   50.19    4.44
  -5  -4  -2  177.46   10.16
  -5  -4  -3  279.62   13.28
   5   4   4  245.11   12.64
  -5  -4  -4  255.51   13.35
   5   4   5    9.99    3.39
   5   4   6   33.53    5.05
   5   4   7   84.98    7.46
   5   4   8  100.87    7.35
   5   4   8  110.57    8.71
   5   4   9  334.77   12.11
   5   4   9  359.04   13.61
   5   4  10   11.19    2.15
   5   4  10   10.18    2.31
   5   4  11  244.28    6.98
  -5  -5  18    3.55    1.16
   5   5 -18    4.28    0.95
  -5  -5  17   90.88    5.83
   5   5 -17   92.49    5.92
  -5  -5  16  415.03   14.06
   5   5 -16  410.13   14.26
  -5  -5  15  569.22   17.78
   5   5 -15  515.21   17.42
   5   5 -14   13.12    3.80
  -5  -5  14   10.38    3.11
   5   5 -13  127.67    9.69
   5   5 -12  100.45    8.59
   5   5 -11  114.28    9.19
  -5  -5  11  125.71    9.82
   5   5 -10  706.64   21.32
  -5  -5  10  682.82   21.73
  -5  -5   9  793.73   22.56
  -5  -5   8  895.77   22.96
  -5  -5   7  738.28   19.79
  -5  -5   6  589.84   16.87
  -5  -5   5 2145.45   30.59
  -5  -5   4  300.55   10.96
  -5  -5   3  462.78   13.08
  -5  -5   2  190.80    9.74
  -5  -5   2  183.68    8.09
  -5  -5   1    2.06    1.79
  -5  -5   0  140.61    8.94
  -5  -5  -1  207.05   11.12
  -5  -5  -2  120.75    8.96
   5   5   2  134.82    9.56
  -5  -5  -3    1.68    3.05
   5   5   3    7.57    2.25
   5   5   4    4.15    3.05
   5   5   5    8.59    3.00
   5   5   6  223.72   12.87
   5   5   7  211.14   11.84
   5   5   8   52.13    5.76
   5   5   9  102.62    6.54
   5   5  10  252.25    7.74
   5   6 -18   66.70    3.81
  -5  -6  17  295.26    9.12
   5   6 -17  309.37   10.51
  -5  -6  16   82.51    5.79
   5   6 -16   79.54    6.40
  -5  -6  15  101.12    7.30
   5   6 -15   88.63    7.36
   5   6 -14   75.57    7.31
  -5  -6  14   79.52    6.75
   5   6 -13  258.22   13.66
  -5  -6  13  252.97   12.25
   5   6 -12 1227.64   29.53
   5   6 -11  257.24   13.57
  -5  -6  10   28.08    5.00
   5   6 -10   11.35    3.33
   5   6  -9 1308.51   29.12
  -5  -6   9 1348.98   30.00
   5   6  -8   83.39    7.28
  -5  -6   8   69.24    6.78
  -5  -6   7 2876.64   40.00
  -5  -6   6  242.45   11.20
  -5  -6   5  927.34   20.77
  -5  -6   4  215.58    9.46
  -5  -6   3   79.60    6.75
  -5  -6   2   71.98    6.38
  -5  -6   1  215.85   11.23
   5   6  -1  221.06   11.31
  -5  -6   0   59.01    6.23
   5   6   0   59.73    6.28
  -5  -6  -1  339.40   14.75
   5   6   1  327.99   14.42
   5   6   2    7.82    3.06
   5   6   3    7.50    3.57
   5   6   4    6.74    2.74
   5   6   5  201.82   12.05
   5   6   6  167.37   10.50
   5   6   7  330.84   13.41
   5   6   8  791.30   17.82
   5   6   9    6.38    1.63
   5   6   9   12.21    2.31
   5   7 -18    0.60    0.85
   5   7 -17   90.83    5.59
   5   7 -16   95.01    6.75
   5   7 -15   24.51    4.11
   5   7 -14  511.66   17.91
   5   7 -13  362.17   15.82
   5   7 -12  689.02   22.19
   5   7 -11  519.28   19.23
   5   7 -10   13.69    3.65
   5   7  -9  937.07   25.39
  -5  -7   9 1000.63   26.20
   5   7  -9  935.86   24.06
   5   7  -8  364.53   15.61
  -5  -7   8  356.58   15.08
   5   7  -8  345.36   14.32
   5   7  -7  245.61   12.81
   5   7  -7  230.17   11.42
  -5  -7   7  229.12   11.66
   5   7  -6  729.52   21.59
   5   7  -6  692.75   19.38
   5   7  -5   10.33    2.97
   5   7  -5    6.14    2.20
  -5  -7   4   25.00    4.29
   5   7  -4   35.50    4.33
   5   7  -4   34.21    4.77
  -5  -7   3  150.24    9.73
   5   7  -3  148.65    9.11
   5   7  -3  146.20    9.19
  -5  -7   2   10.82    3.10
   5   7  -2   13.43    3.31
   5   7  -2   17.25    3.38
  -5  -7   1   48.64    5.66
   5   7  -1   54.14    5.65
   5   7  -1   55.63    6.25
   5   7   0  491.02   18.07
   5   7   0  494.40   17.81
   5   7   1    4.93    2.27
   5   7   1   -0.92    1.66
   5   7   2   62.84    6.78
   5   7   3   17.60    3.98
   5   7   4  226.67   12.47
   5   7   5    4.69    2.22
   5   7   6  888.64   21.41
   5   7   7    2.71    2.03
   5   7   7    9.94    2.32
   5   7   8  586.97   11.98
   5   7   8  611.34   12.78
   5   8 -17    6.45    1.72
   5   8 -16    5.62    2.41
   5   8 -15  307.01   12.51
   5   8 -14   46.87    4.54
   5   8 -14   36.15    4.95
   5   8 -13 1746.59   33.41
   5   8 -12   53.56    6.25
   5   8 -11  741.49   22.82
   5   8 -10  232.04   12.94
   5   8  -9  235.37   13.08
   5   8  -9  255.21   12.84
   5   8  -8  216.69   12.40
   5   8  -8  212.00   11.60
   5   8  -7    6.68    2.77
   5   8  -7    9.14    2.87
   5   8  -6   44.50    5.69
   5   8  -6   45.01    5.30
   5   8  -5  406.12   16.90
   5   8  -5  404.42   15.28
   5   8  -5  398.78   15.00
   5   8  -4    0.24    1.51
   5   8  -4   -3.33    1.85
   5   8  -3   75.40    6.64
   5   8  -3   61.82    6.55
   5   8  -2  211.62   11.47
   5   8  -2  205.47   11.31
   5   8  -1  182.05   10.81
   5   8  -1  193.14   11.23
   5   8   0   84.64    7.66
   5   8   0   81.52    7.49
   5   8   1   35.92    5.13
   5   8   1   42.11    5.58
   5   8   2  128.91    9.33
   5   8   2  124.79    9.07
   5   8   3   49.04    5.94
   5   8   3   47.58    5.97
   5   8   4  107.04    8.00
   5   8   4  100.24    7.69
   5   8   5   76.20    6.17
   5   8   5   67.21    5.80
   5   8   6  397.31   11.91
   5   8   6  391.22   11.70
   5   8   7  521.85   10.68
   5   9 -17   38.90    2.94
   5   9 -16    8.83    2.13
   5   9 -15  428.07   13.45
   5   9 -14  261.43    9.99
   5   9 -14  282.54   11.90
   5   9 -14  279.49   12.18
   5   9 -13  371.83   14.67
   5   9 -12  574.43   18.90
   5   9 -11  107.03    8.67
   5   9 -10  274.35   13.92
   5   9  -9    2.74    2.34
   5   9  -9    7.95    3.36
   5   9  -8  252.57   13.46
   5   9  -8  237.57   12.30
   5   9  -7  313.93   15.09
   5   9  -7  311.43   13.82
   5   9  -6   80.67    7.74
   5   9  -6   72.30    6.81
   5   9  -5   86.53    7.95
   5   9  -5   78.44    7.09
   5   9  -4   68.96    7.39
   5   9  -4   73.68    6.88
   5   9  -3  140.70    9.41
   5   9  -2   28.65    4.58
   5   9  -1  166.45   10.05
   5   9  -1  168.89   10.39
   5   9   0  104.71    8.27
   5   9   0  101.14    7.85
   5   9   1   55.28    6.12
   5   9   1   47.70    5.68
   5   9   2  197.52   10.79
   5   9   2  172.95    9.74
   5   9   3   49.35    5.41
   5   9   3   47.81    4.90
   5   9   4  450.13   13.79
   5   9   4  415.88   12.38
   5   9   5  235.46    8.55
   5  10 -16   41.63    3.13
   5  10 -15  206.95    6.16
   5  10 -15  270.09    9.32
   5  10 -14  404.61   11.33
   5  10 -14  434.98   13.46
   5  10 -13  120.48    7.29
   5  10 -13  130.29    8.04
   5  10 -13  135.19    8.41
   5  10 -12  463.11   15.81
   5  10 -12  493.11   16.94
   5  10 -11   49.35    5.84
   5  10 -10  322.93   14.41
   5  10  -9  164.00   10.49
   5  10  -9  150.36    9.58
   5  10  -8   44.67    5.81
   5  10  -8   47.00    5.66
   5  10  -7   11.03    3.30
   5  10  -7    9.40    3.43
   5  10  -6  120.32    9.62
   5  10  -6  108.95    8.20
   5  10  -5   26.09    4.58
   5  10  -5   17.35    3.67
   5  10  -4    8.95    2.86
   5  10  -4    5.68    2.14
   5  10  -3   -0.68    2.26
   5  10  -3    6.35    2.62
   5  10  -2   -3.85    2.51
   5  10  -2    1.37    2.02
   5  10  -1   18.33    3.81
   5  10  -1   14.57    3.20
   5  10   0  167.62    9.62
   5  10   1  289.04   12.12
   5  10   2  171.72    8.79
   5  10   3  515.95   13.35
   5  10   4    1.84    1.19
   5  11 -14  226.15    7.19
   5  11 -14  231.44    7.68
   5  11 -13   95.89    5.84
   5  11 -13  100.64    6.00
   5  11 -13   94.99    5.70
   5  11 -12    9.80    2.52
   5  11 -12    7.64    2.64
   5  11 -12    8.74    2.32
   5  11 -11  185.71    9.48
   5  11 -11  175.32    8.96
   5  11 -10   11.97    3.02
   5  11  -9   80.46    6.93
   5  11  -8   60.09    6.15
   5  11  -8   59.81    5.87
   5  11  -7  137.92    9.34
   5  11  -7  128.65    8.39
   5  11  -6    4.78    2.45
   5  11  -6   -2.62    2.32
   5  11  -5   29.22    4.66
   5  11  -5   30.49    4.29
   5  11  -4    9.15    3.24
   5  11  -4    8.00    2.89
   5  11  -3   98.83    7.17
   5  11  -2  147.72    8.61
   5  11  -1  379.41   13.11
   5  11   0   12.70    2.55
   5  11   1  244.11    9.07
   5  11   2   11.75    1.83
   5  12 -13   10.33    1.70
   5  12 -12    9.44    1.98
   5  12 -11   81.22    5.90
   5  12 -11   68.35    4.59
   5  12 -10  489.90   15.18
   5  12 -10  469.90   12.87
   5  12  -9   50.71    4.66
   5  12  -8    1.22    1.47
   5  12  -7   14.87    2.85
   5  12  -6    9.19    2.61
   5  12  -5    1.92    2.12
   5  12  -4  238.33    9.89
   5  12  -3   12.76    2.54
   5  12  -2    3.33    1.58
   5  12  -1  130.79    6.15
   5  13  -9   82.61    5.07
   5  13  -8   21.54    2.72
  -6  15  -2  148.36    7.38
  -6  15  -3  334.88   11.00
  -6  15  -4  171.11    7.70
  -6  14   4  419.05   11.18
  -6  14   3   67.00    4.88
  -6  14   2   52.02    4.58
  -6  14   1   84.48    5.38
  -6  14   1   90.38    6.45
  -6  14   0  116.38    7.57
  -6  14  -1   90.23    6.98
  -6  14  -2  725.22   18.98
  -6  14  -3   15.03    3.55
  -6  14  -4  432.26   14.68
  -6  14  -5    1.52    1.74
  -6  14  -6  240.31   10.22
  -6  14  -7   24.32    3.34
  -6  13   7   11.23    1.94
  -6  13   6  291.97    9.97
  -6  13   5  514.18   14.86
  -6  13   4   38.99    4.63
  -6  13   3   64.43    6.23
  -6  13   2    3.59    2.78
  -6  13   2   12.19    3.12
  -6  13   1   78.45    6.54
  -6  13   1   79.19    6.66
  -6  13   0  941.83   22.70
  -6  13   0  935.97   20.80
  -6  13   0  940.28   24.64
  -6  13  -1   52.51    6.03
  -6  13  -1   53.61    6.55
  -6  13  -2  594.85   18.67
  -6  13  -2  588.98   19.91
  -6  13  -3  272.05   13.47
  -6  13  -4  392.89   15.77
  -6  13  -4  427.71   13.67
  -6  13  -5  111.76    8.16
  -6  13  -5  130.61    7.90
  -6  13  -6   58.95    5.41
  -6  13  -6   60.79    5.49
  -6  13  -7   13.55    2.96
  -6  13  -8   48.09    4.41
  -6  13  -9  212.98    7.86
  -6  12   8  175.79    7.18
  -6  12   7  112.76    6.81
  -6  12   6   33.21    4.36
  -6  12   5  280.67   13.21
  -6  12   4  279.08   13.83
  -6  12   3  247.85   13.48
  -6  12   3  272.24   12.36
  -6  12   2  511.98   19.32
  -6  12   2  542.52   19.04
  -6  12   2  548.80   17.72
  -6  12   1   82.28    7.37
  -6  12   1   88.18    8.16
  -6  12   1   87.36    8.10
  -6  12   0  858.16   22.68
  -6  12   0  885.26   23.10
  -6  12   0  831.88   24.19
  -6  12  -1  114.35    9.17
  -6  12  -2   96.26    8.60
  -6  12  -3  235.51   11.25
  -6  12  -3  221.02   12.95
  -6  12  -4    1.81    1.87
  -6  12  -4    5.18    2.95
  -6  12  -5  378.69   15.03
  -6  12  -5  324.43   15.28
  -6  12  -6   54.87    6.06
  -6  12  -6   41.04    5.57
  -6  12  -7  113.30    8.08
  -6  12  -7  110.44    7.74
  -6  12  -8   39.00    4.71
  -6  12  -9    6.77    2.09
  -6  12 -10    4.47    1.75
  -6  11  10   21.85    2.23
  -6  11   9  139.37    6.71
  -6  11   8   94.37    6.53
  -6  11   7  157.66    9.50
  -6  11   6  360.67   15.59
  -6  11   5   54.86    6.91
  -6  11   4  779.64   25.03
  -6  11   4  814.42   21.76
  -6  11   3   53.70    7.19
  -6  11   3   55.13    6.57
  -6  11   3   55.34    6.13
  -6  11   2 1071.90   25.12
  -6  11   2  993.36   28.51
  -6  11   2 1043.49   26.82
  -6  11   1 1213.45   26.76
  -6  11   1 1218.35   30.62
  -6  11   1 1213.31   29.03
  -6  11   0  135.84   10.08
  -6  11   0  146.99   10.17
  -6  11  -1   97.55    8.72
  -6  11  -2   45.14    5.54
  -6  11  -2   46.67    6.40
  -6  11  -3    4.26    2.35
  -6  11  -3    3.24    2.46
  -6  11  -4   69.22    7.11
  -6  11  -4   65.04    7.49
  -6  11  -5   53.16    6.11
  -6  11  -5   52.23    6.69
  -6  11  -6   -3.84    2.96
  -6  11  -6   -1.00    1.15
  -6  11  -7   49.03    6.02
  -6  11  -7   44.14    5.65
  -6  11  -8    9.68    2.97
  -6  11  -8   11.27    3.19
  -6  11  -9   45.36    4.36
  -6  11  -9   53.07    5.48
  -6  11 -10   12.13    2.80
  -6  11 -11  134.93    6.20
  -6  10  11  137.93    5.06
  -6  10  11  145.19    6.13
  -6  10  10   20.31    2.68
  -6  10  10   20.62    2.93
  -6  10   9  315.44   11.79
  -6  10   9  304.23   11.77
  -6  10   8  349.16   13.99
  -6  10   8  337.44   13.42
  -6  10   7   16.20    4.05
  -6  10   6  624.04   21.67
  -6  10   5  482.26   19.88
  -6  10   5  491.93   17.13
  -6  10   4   58.61    7.57
  -6  10   4   60.18    6.82
  -6  10   4   61.26    6.41
  -6  10   3 1304.85   27.41
  -6  10   3 1275.11   29.20
  -6  10   2   16.67    3.40
  -6  10   2   12.80    3.58
  -6  10   2   12.79    3.72
  -6  10   1 1365.96   30.46
  -6  10   1 1337.11   32.56
  -6  10   0   23.17    4.08
  -6  10   0   23.42    4.44
  -6  10  -1  138.21   10.26
  -6  10  -2   78.37    6.96
  -6  10  -2   79.22    8.06
  -6  10  -3   98.46    8.05
  -6  10  -3   78.15    8.32
  -6  10  -4   48.35    6.04
  -6  10  -4   35.80    5.79
  -6  10  -5  196.49   12.03
  -6  10  -5  172.69   12.78
  -6  10  -6   41.60    5.46
  -6  10  -6   35.75    6.07
  -6  10  -6   32.24    5.98
  -6  10  -7    4.75    3.28
  -6  10  -7    6.93    3.03
  -6  10  -7    3.23    3.13
  -6  10  -8    3.35    2.57
  -6  10  -8    2.47    1.37
  -6  10  -9   -0.87    2.61
  -6  10  -9   -1.53    1.88
  -6  10  -9   -2.47    3.84
  -6  10 -10   32.41    5.04
  -6  10 -10   27.80    3.50
  -6  10 -10   35.05    4.42
  -6  10 -11  935.89   21.00
  -6  10 -11  890.19   17.43
  -6  10 -12  165.70    5.80
  -6   9  13  228.32    6.58
  -6   9  12   36.22    3.50
  -6   9  11   27.74    2.97
  -6   9  11   34.55    4.08
  -6   9  10  445.69   13.80
  -6   9  10  458.99   15.27
  -6   9   9    2.05    2.18
  -6   9   9   -3.43    2.57
  -6   9   8  863.72   23.59
  -6   9   8  852.82   23.55
  -6   9   7  672.80   21.53
  -6   9   7  705.42   22.63
  -6   9   6  125.56   10.36
  -6   9   6  123.78    9.31
  -6   9   5  128.28   10.55
  -6   9   5  123.22    9.19
  -6   9   5  121.75    8.75
  -6   9   4   47.32    5.70
  -6   9   4   52.84    6.92
  -6   9   4   49.55    5.86
  -6   9   3 1063.16   24.02
  -6   9   3  999.32   29.31
  -6   9   3 1026.47   26.52
  -6   9   3 1033.03   25.40
  -6   9   3 1049.68   28.24
  -6   9   2 1704.31   32.94
  -6   9   2 1776.49   33.40
  -6   9   2 1801.18   34.77
  -6   9   1  218.51   11.63
  -6   9   1  232.30   12.28
  -6   9   1  233.95   11.92
  -6   9   1  204.36   12.85
  -6   9   0  133.31    9.78
  -6   9   0  128.87    8.91
  -6   9   0  135.76    9.63
  -6   9  -1  348.14   14.23
  -6   9  -1  342.56   15.57
  -6   9  -2  538.79   18.43
  -6   9  -2  557.34   20.52
  -6   9  -3   23.49    4.44
  -6   9  -3   28.26    4.63
  -6   9  -3   32.36    5.33
  -6   9  -4  113.42    9.07
  -6   9  -4   92.08    9.23
  -6   9  -4  109.82    9.62
  -6   9  -5   40.38    5.66
  -6   9  -5   32.76    5.73
  -6   9  -5   31.14    6.04
  -6   9  -6   94.53    8.76
  -6   9  -6   77.66    8.75
  -6   9  -6   78.60    8.57
  -6   9  -7   39.30    5.79
  -6   9  -7   31.47    6.25
  -6   9  -7   33.80    5.26
  -6   9  -8   -0.41    2.74
  -6   9  -8    1.95    3.32
  -6   9  -8   -2.50    2.78
  -6   9  -9   99.28    9.72
  -6   9  -9  115.84    9.01
  -6   9  -9  123.80    8.92
  -6   9 -10  440.54   17.87
  -6   9 -10  441.60   15.12
  -6   9 -10  434.52   14.96
  -6   9 -11   75.43    6.93
  -6   9 -11   64.47    5.24
  -6   9 -12  443.06   12.99
  -6   9 -12  387.43    9.71
  -6   8  14  306.98    7.95
  -6   8  13  212.54    8.40
  -6   8  12   34.47    4.19
  -6   8  11    2.48    1.44
  -6   8  11   -1.46    2.46
  -6   8  10  176.53    9.64
  -6   8  10  176.80   10.51
  -6   8   9 1200.70   27.07
  -6   8   9 1155.54   27.69
  -6   8   8    1.91    2.77
  -6   8   8    8.19    3.06
  -6   8   7 1865.25   37.24
  -6   8   6   60.10    7.26
  -6   8   6   62.82    6.50
  -6   8   5 1378.20   31.67
  -6   8   5 1434.44   33.94
  -6   8   5 1499.59   29.80
  -6   8   5 1401.26   34.53
  -6   8   4  353.17   15.32
  -6   8   4  352.98   17.10
  -6   8   4  357.73   14.53
  -6   8   4  372.97   16.92
  -6   8   3  185.26   10.66
  -6   8   3  191.77   12.82
  -6   8   3  191.05   10.51
  -6   8   3  178.60   10.92
  -6   8   2  403.99   15.30
  -6   8   2  373.96   17.30
  -6   8   2  417.39   15.43
  -6   8   2  406.82   15.39
  -6   8   1    2.14    1.99
  -6   8   1    5.96    2.36
  -6   8   1    6.09    2.11
  -6   8   0    1.38    1.54
  -6   8   0    3.03    2.19
  -6   8  -1   36.88    5.23
  -6   8  -2  289.45   13.25
  -6   8  -2  272.54   12.99
  -6   8  -2  277.96   14.26
  -6   8  -3   50.53    6.17
  -6   8  -3   70.54    7.26
  -6   8  -3   59.85    7.02
  -6   8  -4   47.90    5.87
  -6   8  -4   47.40    6.40
  -6   8  -4   55.60    7.17
  -6   8  -5  216.43   12.65
  -6   8  -5  225.05   13.86
  -6   8  -5  201.20   13.75
  -6   8  -6  174.57   11.60
  -6   8  -6  149.44   11.95
  -6   8  -6  151.98   12.14
  -6   8  -7   23.72    5.00
  -6   8  -7   20.46    5.34
  -6   8  -7   19.72    4.93
  -6   8  -8  197.23   11.99
  -6   8  -8  188.77   13.69
  -6   8  -8  182.93   13.02
  -6   8  -9   11.61    3.67
  -6   8  -9   18.90    4.17
  -6   8  -9   12.81    4.08
  -6   8 -10 1015.79   25.06
  -6   8 -10 1069.77   28.68
  -6   8 -10  998.77   23.23
  -6   8 -11  276.44   13.14
  -6   8 -11  245.90   10.35
  -6   8 -11  257.45   10.44
  -6   8 -12  289.37   11.44
  -6   8 -13  398.73   10.36
  -6   7  15   81.92    4.02
  -6   7  14  455.37   12.07
  -6   7  13   48.92    4.82
  -6   7  12   21.21    3.88
  -6   7  11  198.01    9.82
  -6   7  11  202.25   11.35
  -6   7  10   25.28    4.21
  -6   7  10   31.93    5.05
  -6   7   9 1368.60   29.40
  -6   7   8  887.45   24.55
  -6   7   7 1134.10   28.27
  -6   7   7 1133.06   25.96
  -6   7   7 1055.61   29.25
  -6   7   6  822.11   24.58
  -6   7   6  873.25   25.38
  -6   7   6  874.61   22.11
  -6   7   5  547.93   19.02
  -6   7   5  547.00   17.20
  -6   7   5  569.60   20.76
  -6   7   4  791.29   21.63
  -6   7   3    5.96    2.12
  -6   7   2  171.16    9.53
  -6   7   2  182.00    9.51
  -6   7   1   96.19    7.02
  -6   7   1   99.87    6.67
  -6   7   0   85.46    6.62
  -6   7   0   89.51    5.92
  -6   7  -1  341.58   13.16
  -6   7  -2  661.93   20.59
  -6   7  -3   69.99    7.15
  -6   7  -4  108.89    8.63
  -6   7  -4   99.53    8.67
  -6   7  -4  102.59    8.69
  -6   7  -5   40.82    5.64
  -6   7  -5   41.38    6.03
  -6   7  -5   44.20    6.10
  -6   7  -5   41.14    5.18
  -6   7  -6  375.12   16.59
  -6   7  -6  348.90   17.93
  -6   7  -6  339.98   15.52
  -6   7  -7   58.04    7.15
  -6   7  -7   56.45    8.11
  -6   7  -8  729.89   26.62
  -6   7  -8  807.54   23.85
  -6   7  -9  217.56   14.28
  -6   7  -9  215.95   12.02
  -6   7 -10  705.47   23.73
  -6   7 -10  655.17   19.06
  -6   7 -11  374.47   15.64
  -6   7 -11  364.65   12.45
  -6   7 -12   70.03    6.14
  -6   7 -12   63.50    4.68
  -6   7 -13  373.29   10.70
  -6   6  15  301.34    9.41
  -6   6  14   10.69    2.67
  -6   6  13  257.26   11.68
  -6   6  12   19.40    3.90
  -6   6  11 1150.09   24.07
  -6   6  11 1133.28   27.19
  -6   6  10 1356.64   28.02
  -6   6   9   20.58    4.00
  -6   6   9   14.10    3.07
  -6   6   8  779.68   22.53
  -6   6   8  751.92   24.45
  -6   6   7   16.90    4.14
  -6   6   7   13.67    3.08
  -6   6   6 1366.53   30.03
  -6   6   5  438.94   16.05
  -6   6   4  461.86   15.56
  -6   6   3   76.28    6.16
  -6   6   2  178.31    9.13
  -6   6   1   20.17    3.26
  -6   6   1   24.68    3.11
  -6   6   0  164.02    8.95
  -6   6   0  151.95    8.33
  -6   6   0  145.79    6.64
  -6   6  -1    8.24    2.36
  -6   6  -1    9.02    2.73
  -6   6  -2    2.71    1.94
  -6   6  -3   41.28    5.41
  -6   6  -4  723.91   22.16
  -6   6  -5  217.50   12.38
  -6   6  -5  213.61   11.92
  -6   6  -5  210.30   12.33
  -6   6  -6  690.48   22.25
  -6   6  -6  715.93   23.03
  -6   6  -6  671.67   21.64
  -6   6  -7  531.21   19.59
  -6   6  -8  644.50   21.11
  -6   6  -9  885.34   23.70
  -6   6 -10    2.81    2.13
   6  -6  11  160.81    8.58
  -6   6 -11  158.22    8.12
  -6   6 -12  105.96    7.38
  -6   6 -13   55.90    4.43
  -6   5  16    5.24    1.28
  -6   5  15  369.88   11.73
  -6   5  14  257.32   11.33
  -6   5  13  643.42   19.37
  -6   5  12  662.29   20.71
  -6   5  11  424.34   15.07
  -6   5  11  431.21   17.02
  -6   5  10 1992.39   33.62
  -6   5  10 1960.57   36.17
  -6   5   9    5.22    2.49
  -6   5   9    3.78    3.18
  -6   5   9   -1.45    2.62
  -6   5   8  461.23   18.21
  -6   5   7  406.05   16.18
  -6   5   6   48.58    5.35
  -6   5   5 1193.27   25.11
  -6   5   4   10.78    2.58
  -6   5   3   41.89    4.48
  -6   5   2   47.12    4.61
  -6   5   2   56.78    4.82
  -6   5   1   75.85    5.65
  -6   5   1   73.46    5.61
  -6   5   0    1.65    1.24
  -6   5   0   -1.06    1.54
  -6   5  -1   61.77    5.56
  -6   5  -1   58.87    5.16
  -6   5  -2  349.22   13.53
  -6   5  -3  170.12    9.77
  -6   5  -4   19.86    3.73
  -6   5  -5 1435.74   30.91
  -6   5  -5 1405.43   30.36
  -6   5  -6  392.00   16.76
  -6   5  -6  383.70   16.45
   6  -5   7 3030.55   44.44
  -6   5  -7 3145.62   46.60
  -6   5  -8    9.32    3.31
   6  -5   8    8.01    3.16
   6  -5   9  589.66   19.86
  -6   5  -9  541.27   18.31
   6  -5  10  339.43   14.43
  -6   5 -10  322.46   12.88
   6  -5  11   50.24    5.32
   6  -5  12  180.36    8.42
   6  -5  13  170.28    6.33
  -6   5 -13  198.02    8.07
  -6   4  16  119.70    5.99
  -6   4  15   72.37    5.02
  -6   4  15   81.30    6.03
  -6   4  14  794.34   18.69
  -6   4  14  805.88   20.88
  -6   4  13   39.37    4.82
  -6   4  13   37.29    4.92
  -6   4  12 1594.19   29.93
  -6   4  12 1500.53   31.71
  -6   4  11  346.54   14.20
  -6   4  11  354.33   15.52
  -6   4  10  597.78   18.22
  -6   4  10  584.04   21.45
  -6   4  10  608.71   19.92
  -6   4   9   11.36    3.39
  -6   4   9   18.74    3.81
  -6   4   8  168.84   10.60
  -6   4   7  463.30   16.25
  -6   4   6  918.07   21.46
  -6   4   5   17.93    3.15
  -6   4   4  154.50    8.10
  -6   4   3   17.98    2.86
  -6   4   2  238.06    9.38
  -6   4   2  254.94    9.80
  -6   4   1   62.22    4.95
  -6   4   1   90.23    6.05
  -6   4   0   59.20    4.90
  -6   4   0   63.45    5.19
  -6   4  -1   60.85    5.22
  -6   4  -2 1560.53   27.18
  -6   4  -3  595.22   17.56
  -6   4  -4    1.30    1.28
  -6   4  -5  659.67   20.23
   6  -4   6 1189.20   27.57
  -6   4  -6 1237.50   29.18
  -6   4  -6 1186.11   28.49
   6  -4   7 1454.14   31.53
  -6   4  -7 1522.04   32.29
   6  -4   8  521.47   19.05
  -6   4  -8  532.97   18.75
   6  -4   9   55.25    6.59
  -6   4  -9   51.91    5.82
   6  -4  10  220.82   12.02
   6  -4  11   27.90    4.34
   6  -4  12   82.26    5.92
   6  -4  13  285.27    8.81
  -6   3  17   42.11    2.85
  -6   3  17   58.37    3.38
  -6   3  16  204.63    8.23
  -6   3  16  212.44    8.56
  -6   3  15   73.30    5.91
  -6   3  15   72.58    6.01
  -6   3  14  726.04   19.75
  -6   3  14  735.31   20.45
  -6   3  13  991.12   25.57
  -6   3  13 1026.75   24.59
  -6   3  12  404.95   15.90
  -6   3  12  416.11   16.95
  -6   3  11 2135.95   40.52
  -6   3  11 2146.10   37.78
  -6   3  10    1.12    1.72
  -6   3  10   -2.55    1.84
  -6   3   9  177.71   10.86
  -6   3   8   29.62    4.42
  -6   3   7   45.13    4.48
  -6   3   7   56.81    5.45
  -6   3   6   62.69    5.49
  -6   3   6   62.97    5.01
  -6   3   5  403.30   12.08
  -6   3   5  405.31   12.76
  -6   3   4    2.56    1.56
  -6   3   4    2.57    1.30
  -6   3   3   62.22    4.68
  -6   3   2  158.14    7.29
  -6   3   1   -0.99    1.20
  -6   3   0  886.83   17.59
  -6   3   0  904.05   18.60
  -6   3  -1 3700.89   38.71
  -6   3  -2  236.38   10.28
  -6   3  -3  970.15   21.71
  -6   3  -4  348.65   13.80
  -6   3  -5  604.48   18.95
   6  -3   6 1329.66   29.77
  -6   3  -6 1312.89   29.29
  -6   3  -6 1307.57   29.79
   6  -3   7  156.44   10.77
  -6   3  -7  170.58   10.81
   6  -3   8  705.85   22.74
  -6   3  -8  705.42   20.89
   6  -3   9  201.50   12.17
   6  -3  10  277.49   13.68
   6  -3  11  160.14    9.68
   6  -3  12   33.12    4.10
   6  -3  13    7.97    1.98
  -6   2  17  181.53    7.35
  -6   2  16  545.85   15.16
  -6   2  16  549.05   14.16
  -6   2  15  433.23   15.13
  -6   2  15  455.65   14.90
  -6   2  14  171.21   10.35
  -6   2  14  163.98    9.85
  -6   2  14  165.27   10.49
  -6   2  13 1035.61   25.78
  -6   2  13 1013.91   26.20
  -6   2  12  108.81    8.84
  -6   2  11  858.08   25.04
  -6   2  11  900.49   24.22
  -6   2  10   29.21    4.65
  -6   2  10   32.27    4.89
  -6   2   9   81.26    7.13
  -6   2   8  172.68    8.80
  -6   2   8  166.36    9.44
  -6   2   7  475.87   14.72
  -6   2   7  477.71   14.10
  -6   2   6    8.38    2.23
  -6   2   6    8.20    1.97
  -6   2   5   88.64    5.71
  -6   2   5   90.48    5.77
  -6   2   4   13.13    2.32
  -6   2   4   13.82    2.31
  -6   2   3  165.59    7.11
  -6   2   3  159.91    7.33
  -6   2   2   33.68    3.37
  -6   2   2   32.32    2.71
  -6   2   1 1020.05   17.49
  -6   2   1  981.67   15.04
  -6   2   0 3002.98   28.12
  -6   2   0 2969.01   30.65
  -6   2  -1  831.88   15.89
  -6   2  -1  856.46   18.46
  -6   2  -2 1570.99   23.65
  -6   2  -2 1525.31   25.66
  -6   2  -3  838.88   19.97
  -6   2  -3  841.19   18.81
  -6   2  -4 2457.85   36.01
  -6   2  -4 2465.46   34.50
  -6   2  -5  148.62    9.41
  -6   2  -5  135.92    8.64
   6  -2   6  699.25   21.81
  -6   2  -6  701.69   20.58
  -6   2  -6  731.35   21.64
  -6   2  -6  739.92   22.06
   6  -2   7  160.62   10.93
   6  -2   8   45.84    6.15
   6  -2   9  505.78   19.18
   6  -2  10  130.17    9.43
   6  -2  11  383.84   14.52
   6  -2  12  147.96    7.87
   6  -2  13   70.28    4.40
  -6   1  18  158.52    6.10
  -6   1  17  603.02   14.87
  -6   1  16  291.27   12.12
  -6   1  16  283.30   10.10
  -6   1  15 1147.93   25.84
  -6   1  15 1104.48   23.08
  -6   1  14   19.30    4.28
  -6   1  14   25.27    4.00
  -6   1  14   23.53    4.44
  -6   1  13   12.94    3.70
  -6   1  12  130.76   10.03
  -6   1  12  150.90   10.21
  -6   1  11   46.48    5.99
  -6   1  11   51.18    5.81
  -6   1  10  375.02   14.11
  -6   1  10  374.97   15.08
  -6   1   9   57.09    5.41
  -6   1   9   62.75    6.11
  -6   1   8  127.03    7.76
  -6   1   8  128.71    7.81
  -6   1   7  441.00   13.64
  -6   1   7  436.31   13.32
  -6   1   6  476.15   13.69
  -6   1   6  496.05   13.26
  -6   1   5  762.21   16.41
  -6   1   5  790.77   15.78
  -6   1   4   93.58    5.24
  -6   1   4  100.66    5.89
  -6   1   3  425.04   10.71
  -6   1   3  426.79   11.85
  -6   1   2  392.64   10.28
  -6   1   2  398.24   11.39
  -6   1   1  678.12   13.71
  -6   1   1  673.42   13.42
  -6   1   0 2781.59   28.79
  -6   1  -1   33.72    3.45
  -6   1  -1   33.51    3.90
  -6   1  -2 1196.37   21.36
  -6   1  -2 1219.96   23.05
  -6   1  -3  137.12    8.18
  -6   1  -3  127.47    7.62
  -6   1  -4 1905.76   31.57
  -6   1  -4 1870.17   30.88
   6  -1   5  618.05   20.07
  -6   1  -5  621.55   19.00
  -6   1  -5  580.24   18.20
  -6   1  -6   11.66    3.36
  -6   1  -6    9.11    3.02
   6  -1   6   17.85    4.18
   6  -1   7  148.93   10.69
   6  -1   8  251.38   13.84
   6  -1   9   34.40    5.70
   6  -1  10  866.85   23.56
   6  -1  11    1.12    2.25
   6  -1  12  133.74    7.19
   6  -1  13    2.80    1.08
  -6   0  18  110.82    5.79
  -6   0  17  685.00   16.90
  -6   0  16   83.59    6.98
  -6   0  15  489.67   17.46
  -6   0  15  471.64   17.01
  -6   0  14  400.59   16.62
  -6   0  14  408.85   16.43
  -6   0  13    0.35    2.29
  -6   0  12    9.99    2.95
  -6   0  12   14.58    3.39
  -6   0  11  463.71   16.55
  -6   0  11  444.77   16.67
  -6   0  11  496.60   17.58
  -6   0  10   25.88    3.86
  -6   0  10   23.22    3.86
  -6   0   9  620.70   17.84
  -6   0   9  652.98   17.88
  -6   0   8  130.96    8.00
  -6   0   8  125.07    7.38
  -6   0   7   21.32    3.30
  -6   0   7   18.58    2.91
  -6   0   6  415.38   12.91
  -6   0   6  416.09   11.40
  -6   0   5  183.11    8.30
  -6   0   5  199.53    7.46
  -6   0   4  391.88    9.88
  -6   0   4  395.54   11.73
  -6   0   3 1506.95   18.87
  -6   0   3 1549.91   22.83
  -6   0   2 1592.48   22.90
  -6   0   2 1526.95   19.02
  -6   0   1   53.91    4.27
  -6   0   0 1862.05   25.11
  -6   0  -1  336.23   11.36
  -6   0  -1  305.98   11.23
  -6   0  -2 1035.47   20.90
  -6   0  -2 1131.82   22.20
  -6   0  -3 2249.15   32.93
  -6   0  -3 2086.71   31.71
  -6   0  -4   88.45    7.00
  -6   0  -4   86.82    6.98
  -6   0  -5  618.47   18.94
   6   0   5  628.64   20.55
   6   0   6  139.87   10.40
  -6   0  -6  132.32    9.51
  -6   0  -6  126.88    9.32
   6   0   7   30.14    5.04
   6   0   8  483.66   18.98
   6   0   9   65.05    7.18
   6   0  10  347.19   14.42
   6   0  11  161.66    8.77
   6   0  12    2.35    1.55
  -6  -1  19  236.83    6.42
  -6  -1  18  341.11   10.47
  -6  -1  17   97.57    6.88
  -6  -1  16  794.77   21.16
  -6  -1  15   34.61    5.09
  -6  -1  15   30.65    5.20
  -6  -1  14  160.67   10.41
  -6  -1  13   72.08    6.91
  -6  -1  12   34.03    4.98
  -6  -1  12   34.02    4.77
  -6  -1  12   34.97    4.99
  -6  -1  11  107.37    8.27
  -6  -1  11  104.71    7.69
  -6  -1  11  118.37    8.71
  -6  -1  10  335.57   13.95
  -6  -1  10  351.46   13.26
  -6  -1   9   26.15    3.92
  -6  -1   9   31.76    3.91
  -6  -1   8   72.05    6.07
  -6  -1   8   71.27    5.23
  -6  -1   7   83.01    6.25
  -6  -1   7   77.28    5.09
  -6  -1   6  709.87   17.32
  -6  -1   6  725.61   13.96
  -6  -1   5  186.97    6.55
  -6  -1   5  188.11    8.62
  -6  -1   4 2326.93   22.05
  -6  -1   4 2458.25   29.70
  -6  -1   3   17.30    3.00
  -6  -1   3   17.63    2.04
  -6  -1   2 3252.62   33.69
  -6  -1   1  763.27   16.69
  -6  -1   0   23.53    3.28
  -6  -1  -1  566.28   15.65
  -6  -1  -2   81.52    6.34
  -6  -1  -2   72.51    5.93
  -6  -1  -3  973.16   21.86
  -6  -1  -3  918.30   22.21
  -6  -1  -4 1576.32   28.93
   6   1   4 1586.93   31.94
  -6  -1  -5    1.40    1.80
  -6  -1  -5    8.24    2.54
   6   1   5    3.72    2.77
   6   1   6  336.05   15.71
   6   1   7    6.37    3.15
   6   1   8   91.55    8.23
   6   1   9  224.94   12.15
   6   1  10   13.70    3.20
   6   1  11   19.06    3.17
   6   1  11   18.28    2.15
   6   1  12    4.08    1.13
  -6  -2  19   10.96    1.63
  -6  -2  18  196.41    8.08
  -6  -2  17    4.80    2.36
  -6  -2  16  146.42    9.24
  -6  -2  15  691.12   21.17
  -6  -2  15  720.11   20.20
  -6  -2  14   80.75    7.16
   6   2 -13    2.12    2.34
  -6  -2  13    7.70    2.72
   6   2 -12   64.09    6.55
  -6  -2  12   68.40    6.80
  -6  -2  12   64.73    6.55
   6   2 -11   72.44    6.56
  -6  -2  11   72.76    7.08
  -6  -2  11   82.67    7.13
  -6  -2  10  166.17   10.22
  -6  -2   9  168.66    9.87
  -6  -2   8  186.09   10.00
  -6  -2   7   24.41    3.77
  -6  -2   6  654.83   17.10
  -6  -2   5  834.92   18.52
  -6  -2   4 1413.45   23.33
  -6  -2   3 2853.58   32.33
  -6  -2   2  346.15   11.35
  -6  -2   1 1373.11   23.94
  -6  -2   0   68.30    5.76
  -6  -2  -1  452.55   14.93
  -6  -2  -1  445.17   13.95
  -6  -2  -2  902.39   21.99
  -6  -2  -2  921.25   20.63
  -6  -2  -3  386.83   13.85
  -6  -2  -3  367.41   14.81
   6   2   4  696.81   21.62
  -6  -2  -4  699.30   21.42
   6   2   5  159.05   10.75
   6   2   6  445.73   18.00
   6   2   7  370.57   16.34
   6   2   8   55.56    6.17
   6   2   9   12.54    2.67
   6   2   9    4.35    1.45
   6   2  10   16.15    3.03
   6   2  10   18.98    2.66
   6   2  11   98.33    5.08
  -6  -3  19   72.71    3.62
  -6  -3  18    0.74    1.41
  -6  -3  17  131.90    7.76
  -6  -3  16   83.03    6.86
   6   3 -16   96.96    6.51
  -6  -3  15  184.63   10.95
  -6  -3  15  172.98    9.57
   6   3 -14  224.09   11.67
  -6  -3  14  238.73   11.76
   6   3 -13    7.43    3.17
  -6  -3  13    7.68    2.38
   6   3 -12   14.18    3.39
  -6  -3  12   19.74    3.79
  -6  -3  12   14.36    3.25
   6   3 -11    8.75    2.93
  -6  -3  11    2.19    1.55
  -6  -3  11    6.00    2.12
  -6  -3  10   73.77    7.07
  -6  -3   9   55.23    5.86
  -6  -3   8  550.18   17.52
  -6  -3   7  361.16   13.65
  -6  -3   6  772.21   19.19
  -6  -3   5 1165.98   22.70
  -6  -3   4    4.90    1.94
  -6  -3   3 2038.71   28.41
  -6  -3   2  598.27   15.25
  -6  -3   2  578.76   16.27
  -6  -3   1  298.21   12.03
  -6  -3   0  733.38   19.44
  -6  -3  -1   16.81    2.77
  -6  -3  -1   14.59    2.97
  -6  -3  -2  736.87   21.02
  -6  -3  -2  737.68   18.63
   6   3   3 1396.04   30.14
  -6  -3  -3 1538.26   31.92
   6   3   4    0.59    2.62
   6   3   5  272.28   13.95
   6   3   6  155.92   10.67
   6   3   7  336.38   14.67
   6   3   7  354.78   14.68
   6   3   8   13.11    3.14
   6   3   8   16.17    3.21
   6   3   9   29.06    3.85
   6   3   9   30.25    3.61
   6   3  10   18.60    2.47
   6   3  10   15.30    1.91
   6   3  11   98.12    4.34
  -6  -4  18   37.43    3.35
  -6  -4  17   68.49    5.43
   6   4 -17   71.09    4.96
  -6  -4  16  681.62   18.53
   6   4 -16  664.78   17.45
  -6  -4  15  187.10   10.51
   6   4 -14    2.73    2.24
  -6  -4  14    8.68    2.58
   6   4 -13   24.17    4.56
  -6  -4  13   34.88    4.77
   6   4 -12   52.88    6.07
  -6  -4  12   54.21    5.73
   6   4 -11   63.26    6.59
  -6  -4  11   52.61    6.42
  -6  -4  11   53.34    5.60
   6   4 -10  799.44   22.47
  -6  -4  10  765.79   22.85
  -6  -4  10  745.67   20.11
  -6  -4   9 1805.82   33.88
  -6  -4   8    7.54    2.51
  -6  -4   7  754.35   20.36
  -6  -4   6   90.44    6.84
  -6  -4   5 1601.35   27.37
  -6  -4   4 1196.37   22.87
  -6  -4   3    5.01    1.90
  -6  -4   2 1268.57   25.82
  -6  -4   2 1276.11   22.79
  -6  -4   1   24.09    3.91
  -6  -4   0  983.74   24.00
  -6  -4  -1  507.43   17.88
  -6  -4  -2    2.64    2.22
   6   4   2   -3.91    1.89
   6   4   3  213.84   11.85
   6   4   4    8.02    3.00
   6   4   4   10.37    3.34
   6   4   5  187.60   11.31
   6   4   5  193.50   11.26
   6   4   6  317.71   14.12
   6   4   6  320.64   14.04
   6   4   7   22.11    3.74
   6   4   7   16.83    3.18
   6   4   8  142.51    7.69
   6   4   8  155.72    8.24
   6   4   9    4.36    1.46
   6   4   9    6.59    1.40
   6   4  10  250.26    7.72
  -6  -5  18   56.48    3.53
   6   5 -18   54.71    3.20
  -6  -5  17   61.06    4.77
   6   5 -17   60.47    4.66
  -6  -5  16   26.58    3.52
   6   5 -16   29.93    4.12
  -6  -5  15   99.71    7.45
   6   5 -14   34.62    5.25
   6   5 -13   47.29    6.23
   6   5 -12   36.31    5.41
   6   5 -11  154.50   10.45
   6   5 -10   55.77    6.36
  -6  -5  10   42.71    5.74
   6   5  -9 1816.69   34.07
  -6  -5   9 1860.26   35.38
   6   5  -8  217.27   11.69
  -6  -5   8  201.99   11.40
  -6  -5   7 1544.81   29.87
  -6  -5   6  739.28   19.81
  -6  -5   5   83.27    6.49
  -6  -5   4  247.85   10.73
  -6  -5   3   35.52    4.20
  -6  -5   3   40.35    5.15
  -6  -5   2  146.58    9.38
  -6  -5   1 1672.43   31.87
   6   5  -1 1660.78   31.51
  -6  -5   0    1.13    1.86
  -6  -5  -1  828.96   23.69
   6   5   2   19.27    3.68
   6   5   3   53.45    5.96
   6   5   4  117.44    8.69
   6   5   5   67.20    6.70
   6   5   6   17.82    3.42
   6   5   7  137.86    7.86
   6   5   8  150.06    6.73
   6   5   9   50.73    3.88
   6   6 -18   39.66    2.74
   6   6 -17   72.95    5.02
  -6  -6  16   17.90    2.60
   6   6 -16   17.11    3.49
   6   6 -15    3.40    2.42
  -6  -6  15   -0.32    1.17
   6   6 -14    9.38    2.94
  -6  -6  14    6.68    2.45
   6   6 -13   62.05    7.00
   6   6 -12    0.16    1.95
   6   6 -11  642.81   21.39
   6   6 -10 1407.56   31.16
   6   6  -9   51.19    6.23
  -6  -6   9   54.89    6.37
   6   6  -8  241.61   12.72
  -6  -6   8  247.92   12.88
   6   6  -7  526.73   18.49
  -6  -6   7  532.89   17.86
  -6  -6   6 1515.57   28.65
   6   6  -6 1559.75   29.84
   6   6  -5  882.81   22.61
  -6  -6   5  877.78   20.95
  -6  -6   4   18.93    4.46
   6   6  -4   25.68    4.45
  -6  -6   3  246.46   12.55
   6   6  -3  231.72   11.83
  -6  -6   2   62.83    6.49
   6   6  -2   56.97    6.06
  -6  -6   1  611.27   20.28
   6   6  -1  563.31   19.13
   6   6   0 1415.52   28.44
   6   6   0 1350.07   30.27
   6   6   1  536.73   17.96
   6   6   1  507.52   18.87
   6   6   2  197.36   11.12
   6   6   3   24.63    4.15
   6   6   4  148.99    9.40
   6   6   5    7.46    2.39
   6   6   6  138.66    7.84
   6   6   6  140.81    8.76
   6   6   7    0.30    0.60
   6   6   7    1.26    1.85
   6   6   8  117.13    5.64
   6   7 -17    6.14    1.85
   6   7 -16    4.32    2.05
   6   7 -15  104.80    7.48
   6   7 -14    2.62    2.50
   6   7 -13  443.33   17.04
   6   7 -12  340.69   15.34
   6   7 -11    5.78    3.52
   6   7 -10  748.68   23.04
   6   7  -9    7.05    2.80
   6   7  -8  634.88   21.04
   6   7  -7  626.99   20.88
   6   7  -6   21.61    4.27
   6   7  -5  757.13   21.35
   6   7  -4   35.43    5.27
   6   7  -3  920.73   22.08
   6   7  -3  962.93   24.44
   6   7  -2  786.53   20.69
   6   7  -2  774.46   22.33
   6   7  -1    1.79    2.23
   6   7  -1   -0.11    1.42
   6   7   0  223.21   11.62
   6   7   0  243.95   12.97
   6   7   1    4.68    2.66
   6   7   1    3.71    2.88
   6   7   2   17.13    3.51
   6   7   2   19.66    3.97
   6   7   3    8.69    2.91
   6   7   3   10.29    3.25
   6   7   4   10.26    2.32
   6   7   4    2.61    2.19
   6   7   5   71.45    5.36
   6   7   5   80.96    6.54
   6   7   6  264.39    8.65
   6   7   6  265.86    9.98
   6   7   7  259.62    7.79
   6   8 -17    1.88    1.19
   6   8 -16  120.53    6.58
   6   8 -15   96.63    6.63
   6   8 -15   96.66    6.75
   6   8 -14  354.80   11.47
   6   8 -14  371.38   14.01
   6   8 -13  218.10   11.63
   6   8 -12  386.05   15.88
   6   8 -11   23.93    4.50
   6   8 -10  294.53   14.33
   6   8  -9  288.22   14.32
   6   8  -8   24.08    4.57
   6   8  -8   22.47    4.06
   6   8  -7  637.52   21.39
   6   8  -7  632.55   18.98
   6   8  -6  679.33   22.23
   6   8  -6  670.69   19.21
   6   8  -5   92.49    8.29
   6   8  -5   81.67    6.86
   6   8  -5   87.67    7.57
   6   8  -4  160.75    9.51
   6   8  -4  163.11   10.05
   6   8  -3  174.84    9.86
   6   8  -3  167.56   10.37
   6   8  -2  391.62   14.92
   6   8  -2  382.45   15.62
   6   8  -1  132.64    8.76
   6   8  -1  138.10    9.58
   6   8   0   17.87    3.64
   6   8   0   22.99    4.41
   6   8   1   40.04    5.14
   6   8   1   43.70    5.62
   6   8   2   80.07    6.52
   6   8   2   70.05    6.66
   6   8   3    9.52    2.31
   6   8   3    9.84    2.68
   6   8   4   64.13    4.90
   6   8   4   55.30    4.97
   6   8   5   70.95    4.26
   6   8   5   71.80    4.79
   6   9 -16    9.02    1.85
   6   9 -15   15.88    2.90
   6   9 -14  871.24   16.85
   6   9 -14  915.43   20.07
   6   9 -14  903.76   20.33
   6   9 -13  388.93   14.28
   6   9 -12  240.82   11.96
   6   9 -11   63.53    6.56
   6   9 -10    7.62    3.19
   6   9  -9  207.70   12.03
   6   9  -8  513.33   18.94
   6   9  -8  503.36   16.62
   6   9  -7    7.99    3.31
   6   9  -7    0.03    2.46
   6   9  -6  975.06   26.49
   6   9  -6  964.14   22.89
   6   9  -5   53.15    6.61
   6   9  -5   53.83    5.76
   6   9  -4  351.26   16.07
   6   9  -4  340.44   13.50
   6   9  -3   79.77    7.96
   6   9  -3   75.01    6.58
   6   9  -3   83.19    7.23
   6   9  -2   20.48    3.43
   6   9  -2   24.03    3.96
   6   9  -1   33.50    4.21
   6   9  -1   34.12    4.74
   6   9   0   14.37    2.95
   6   9   0   14.42    3.04
   6   9   1   34.46    3.98
   6   9   1   32.24    4.04
   6   9   2   35.35    3.85
   6   9   2   30.06    3.74
   6   9   3  103.05    5.61
   6   9   3   96.24    5.61
   6  10 -15  110.61    5.30
   6  10 -14    1.58    1.13
   6  10 -14    2.13    1.69
   6  10 -14    2.41    1.61
   6  10 -13  447.11   12.71
   6  10 -13  483.88   14.12
   6  10 -13  490.35   14.33
   6  10 -12    1.46    2.43
   6  10 -12    6.83    2.27
   6  10 -11  329.38   13.38
   6  10 -10  197.37   10.90
   6  10  -9    2.01    2.38
   6  10  -8  370.38   15.42
   6  10  -8  353.53   13.35
   6  10  -7  362.39   15.50
   6  10  -7  355.35   13.35
   6  10  -6  543.02   19.00
   6  10  -6  546.55   16.51
   6  10  -5  142.59   10.08
   6  10  -5  142.16    8.45
   6  10  -4  420.60   16.68
   6  10  -4  406.04   13.96
   6  10  -3  213.88   11.88
   6  10  -3  198.94    9.67
   6  10  -2   39.17    4.98
   6  10  -2   34.11    4.25
   6  10  -1  131.80    8.42
   6  10  -1  136.29    7.58
   6  10   0   44.45    4.56
   6  10   0   43.09    4.11
   6  10   1   90.12    5.22
   6  10   2   34.03    2.65
   6  11 -13   24.69    2.71
   6  11 -13   26.46    2.88
   6  11 -12  242.42    9.29
   6  11 -12  240.39    9.11
   6  11 -11   21.46    3.33
   6  11 -10  815.44   19.13
   6  11  -9  146.79    8.57
   6  11  -8   55.36    5.68
   6  11  -7  100.35    7.40
   6  11  -7   88.56    6.13
   6  11  -6   11.74    2.98
   6  11  -6    7.58    2.38
   6  11  -5  166.59    9.28
   6  11  -5  149.04    7.70
   6  11  -4    5.71    2.34
   6  11  -4    3.18    1.70
   6  11  -3    2.24    1.89
   6  11  -3    3.48    1.29
   6  11  -2   23.44    2.82
   6  11  -1   95.52    5.04
   6  12 -11  194.13    7.54
   6  12 -10   66.17    4.96
  -7  14   0  495.17   13.59
  -7  14  -1  266.09   10.45
  -7  14  -2  356.76   12.03
  -7  14  -3  345.26   11.79
  -7  14  -4   71.12    5.40
  -7  14  -5  293.88   10.19
  -7  14  -6   12.72    2.24
  -7  13   7    7.85    1.60
  -7  13   6    5.39    1.82
  -7  13   5    8.00    2.30
  -7  13   4  133.79    8.00
  -7  13   3   37.30    4.44
  -7  13   2  444.72   14.82
  -7  13   2  500.22   14.69
  -7  13   1  164.05    8.68
  -7  13   1  180.26   10.45
  -7  13   1  165.09    8.78
  -7  13   0  511.87   15.67
  -7  13   0  526.52   17.95
  -7  13  -1  509.62   15.81
  -7  13  -1  518.65   18.05
  -7  13  -2   92.15    7.13
  -7  13  -2   94.32    8.02
  -7  13  -3  267.49   13.00
  -7  13  -4   10.90    2.24
  -7  13  -4    9.32    2.88
  -7  13  -5  122.99    7.95
  -7  13  -5  130.96    7.04
  -7  13  -6  106.06    6.37
  -7  13  -6  112.05    6.44
  -7  13  -7  162.70    7.21
  -7  13  -8   11.88    1.90
  -7  12   8   34.19    3.26
  -7  12   7    5.84    2.15
  -7  12   6  169.45    9.33
  -7  12   5   79.15    6.97
  -7  12   4  181.25   11.05
  -7  12   3  482.71   18.31
  -7  12   3  533.82   16.06
  -7  12   2   96.95    8.27
  -7  12   2   80.76    7.38
  -7  12   2   96.84    7.19
  -7  12   1 1000.78   22.72
  -7  12   1 1022.59   25.06
  -7  12   1 1019.57   25.87
  -7  12   0    0.56    2.22
  -7  12   0    2.09    2.47
  -7  12  -1   35.01    5.38
  -7  12  -2  324.16   15.35
  -7  12  -3   35.64    5.58
  -7  12  -3   39.09    4.65
  -7  12  -4  581.51   20.32
  -7  12  -4  650.02   18.22
  -7  12  -5   70.58    7.12
  -7  12  -5   86.16    6.92
  -7  12  -6  116.27    8.25
  -7  12  -6  137.06    8.45
  -7  12  -7  111.07    7.14
  -7  12  -7  127.37    7.75
  -7  12  -8    3.88    1.88
  -7  12  -8    4.31    1.42
  -7  12  -9   61.03    4.33
  -7  11  10   11.70    1.65
  -7  11   9   71.93    4.89
  -7  11   8    6.75    2.46
  -7  11   7   33.32    4.50
  -7  11   6  264.81   13.39
  -7  11   5 1424.83   32.48
  -7  11   4    4.13    2.48
  -7  11   4    5.56    2.85
  -7  11   4    5.42    3.12
  -7  11   3  491.83   20.21
  -7  11   3  542.55   18.75
  -7  11   3  546.21   16.97
  -7  11   2    6.31    2.80
  -7  11   2    3.10    2.49
  -7  11   2    3.90    3.15
  -7  11   1  913.52   22.31
  -7  11   1  935.02   26.18
  -7  11   1  921.47   25.18
  -7  11   0  131.25    9.06
  -7  11   0  124.66    9.74
  -7  11  -1   23.23    4.54
  -7  11  -2  185.42   12.14
  -7  11  -2  203.18   10.48
  -7  11  -3  183.76   12.29
  -7  11  -3  196.80   10.83
  -7  11  -4  228.65   13.65
  -7  11  -4  236.52   12.23
  -7  11  -5  751.97   24.32
  -7  11  -5  851.56   22.77
  -7  11  -6   36.90    5.45
  -7  11  -6   45.49    5.78
  -7  11  -7  163.05   10.28
  -7  11  -7  174.43    9.97
  -7  11  -8   27.65    3.66
  -7  11  -8   30.43    4.12
  -7  11  -9    8.65    2.48
  -7  11  -9    8.63    1.58
  -7  11 -10    8.43    2.05
  -7  10  11   21.73    2.15
  -7  10  11   23.82    2.61
  -7  10  10   80.97    5.28
  -7  10  10   78.21    5.19
  -7  10   9   42.48    4.60
  -7  10   9   37.71    4.20
  -7  10   8  230.90   11.52
  -7  10   8  208.46   10.28
  -7  10   7  558.89   19.39
  -7  10   6  121.32    9.85
  -7  10   5  303.51   16.12
  -7  10   5  316.68   14.24
  -7  10   4   32.55    5.03
  -7  10   4   40.15    6.33
  -7  10   4   39.25    4.90
  -7  10   3  892.51   21.79
  -7  10   3  876.89   23.84
  -7  10   2  676.74   18.94
  -7  10   2  658.60   24.02
  -7  10   2  695.48   21.70
  -7  10   1   90.66    8.91
  -7  10   1   79.47    8.03
  -7  10   0  106.94    9.14
  -7  10   0  124.26    9.43
  -7  10  -1  200.78   12.54
  -7  10  -2   15.04    3.50
  -7  10  -2   10.60    3.55
  -7  10  -3  587.35   19.61
  -7  10  -3  558.69   21.88
  -7  10  -4  108.08    8.72
  -7  10  -4   90.85    9.34
  -7  10  -5  122.16    9.45
  -7  10  -5  124.51   10.60
  -7  10  -6   52.23    7.13
  -7  10  -6   61.99    6.77
  -7  10  -7   31.70    5.29
  -7  10  -7   46.42    6.58
  -7  10  -7   48.77    6.02
  -7  10  -8   31.42    5.02
  -7  10  -8   29.17    4.68
  -7  10  -8   36.18    4.88
  -7  10  -9   19.85    3.21
  -7  10  -9   23.96    3.77
  -7  10 -10  184.16    6.89
  -7  10 -10  212.19    8.63
  -7   9  12    4.93    1.58
  -7   9  11   50.11    4.09
  -7   9  11   48.36    4.59
  -7   9  10   44.48    4.70
  -7   9  10   45.66    4.93
  -7   9   9  305.80   13.16
  -7   9   9  290.04   12.95
  -7   9   8   43.23    5.78
  -7   9   8   52.30    5.94
  -7   9   7  228.85   12.51
  -7   9   7  225.51   13.11
  -7   9   6  510.30   20.44
  -7   9   6  535.97   18.22
  -7   9   5    3.78    3.04
  -7   9   5    4.81    2.61
  -7   9   4 1393.84   29.55
  -7   9   4 1296.07   34.24
  -7   9   3   32.91    5.70
  -7   9   3   38.86    5.38
  -7   9   2  940.40   28.81
  -7   9   2 1004.90   25.35
  -7   9   1  738.41   24.48
  -7   9   1  751.88   22.44
  -7   9   0   23.34    4.74
  -7   9  -1  402.04   15.53
  -7   9  -1  412.64   17.62
  -7   9  -2   71.22    7.00
  -7   9  -2   73.52    7.64
  -7   9  -3  114.58    8.93
  -7   9  -3  110.21    9.94
  -7   9  -4  450.82   17.99
  -7   9  -4  492.11   19.30
  -7   9  -4  445.17   20.26
  -7   9  -5  117.45    9.49
  -7   9  -5  122.06   10.03
  -7   9  -5   97.67   10.11
  -7   9  -6   45.66    6.76
  -7   9  -6   38.79    6.40
  -7   9  -6   38.03    5.57
  -7   9  -7   36.32    6.09
  -7   9  -7   32.18    5.90
  -7   9  -7   39.59    5.68
  -7   9  -8   15.51    4.23
  -7   9  -8   21.46    4.83
  -7   9  -8   27.23    4.79
  -7   9  -9   15.29    3.55
  -7   9  -9   14.70    3.85
  -7   9  -9   15.00    3.60
  -7   9 -10   87.65    7.01
  -7   9 -10   80.34    5.70
  -7   9 -10   86.44    6.04
  -7   9 -11  113.37    6.42
  -7   8  14  164.33    5.73
  -7   8  13    4.03    1.62
  -7   8  12  163.77    6.74
  -7   8  12  178.99    8.71
  -7   8  11    4.34    2.12
  -7   8  11    6.27    2.72
  -7   8  10  153.89    9.24
  -7   8  10  162.86    9.93
  -7   8   9  660.49   20.41
  -7   8   9  635.17   20.34
  -7   8   8 1657.33   34.19
  -7   8   7   55.08    7.10
  -7   8   6  595.70   18.96
  -7   8   6  565.83   21.73
  -7   8   5   10.95    3.45
  -7   8   5    5.05    2.64
  -7   8   4  633.75   21.18
  -7   8   4  613.54   23.59
  -7   8   4  628.79   19.12
  -7   8   4  622.03   21.40
  -7   8   3  857.34   23.96
  -7   8   3  807.15   26.93
  -7   8   3  844.95   22.22
  -7   8   3  829.44   23.15
  -7   8   2  232.93   12.26
  -7   8   2  207.16   13.75
  -7   8   2  232.24   12.04
  -7   8   2  220.26   11.02
  -7   8   1  349.40   17.12
  -7   8   1  357.70   15.00
  -7   8   1  368.00   15.23
  -7   8   0   39.16    5.46
  -7   8   0   36.96    5.18
  -7   8  -1  398.12   15.41
  -7   8  -1  417.99   17.34
  -7   8  -2 1202.69   27.93
  -7   8  -2 1197.95   30.74
  -7   8  -2 1178.43   27.08
  -7   8  -3   14.10    3.57
  -7   8  -3   14.89    3.53
  -7   8  -3   18.66    4.60
  -7   8  -4  320.20   15.37
  -7   8  -4  352.34   16.42
  -7   8  -4  339.19   17.80
  -7   8  -5   10.49    3.68
  -7   8  -5   11.73    3.72
  -7   8  -5   11.21    3.84
  -7   8  -6   -1.28    2.43
  -7   8  -6    7.48    3.72
  -7   8  -6    8.99    3.55
  -7   8  -7    5.09    2.81
  -7   8  -7    3.95    3.56
  -7   8  -7    3.51    3.23
  -7   8  -8   26.48    4.89
  -7   8  -8   37.68    5.94
  -7   8  -8   28.93    5.61
  -7   8  -9  196.11   11.87
  -7   8  -9  209.24   11.76
  -7   8  -9  193.72   10.47
  -7   8 -10    2.46    2.06
  -7   8 -10    2.63    2.40
  -7   8 -10    0.02    1.30
  -7   8 -11  354.74   12.08
  -7   8 -11  338.62   10.03
  -7   8 -12    1.59    1.24
  -7   7  15   47.15    3.07
  -7   7  14    8.34    2.09
  -7   7  13   19.80    3.27
  -7   7  12   75.29    5.29
  -7   7  12   77.29    6.62
  -7   7  11  337.11   12.80
  -7   7  11  325.58   13.99
  -7   7  10 1458.84   29.01
  -7   7  10 1405.02   30.12
  -7   7   9   43.48    5.87
  -7   7   8 1244.04   29.82
  -7   7   7    6.75    2.91
  -7   7   7    9.12    3.70
  -7   7   6  740.22   23.35
  -7   7   6  731.71   24.44
  -7   7   6  733.30   20.16
  -7   7   6  683.33   19.15
  -7   7   5  229.89   12.50
  -7   7   5  224.22   13.86
  -7   7   5  225.25   11.21
  -7   7   5  212.87   10.83
  -7   7   4  364.72   15.28
  -7   7   4  375.08   14.33
  -7   7   3   70.81    6.87
  -7   7   3   93.86    7.35
  -7   7   3   80.39    6.85
  -7   7   2 1842.26   32.76
  -7   7   2 1918.59   29.85
  -7   7   1   55.24    5.97
  -7   7   1   54.29    5.85
  -7   7   0 1383.51   28.21
  -7   7   0 1497.71   30.63
  -7   7  -1   30.24    4.42
  -7   7  -1   28.42    4.44
  -7   7  -2  195.30   11.36
  -7   7  -2  193.16   10.73
  -7   7  -2  209.28   12.52
  -7   7  -2  215.32   12.90
  -7   7  -3    1.78    1.81
  -7   7  -3    5.98    2.99
  -7   7  -3    1.79    2.17
  -7   7  -4   67.21    7.36
  -7   7  -4   74.93    8.12
  -7   7  -4   62.03    7.09
  -7   7  -5   51.56    6.89
  -7   7  -5   46.88    6.17
  -7   7  -6    7.94    3.39
  -7   7  -6    7.94    4.04
  -7   7  -7  125.94   10.77
  -7   7  -7  116.05    9.41
  -7   7  -8  278.68   15.29
  -7   7  -8  270.62   13.56
  -7   7  -9  349.07   15.90
  -7   7  -9  334.62   13.75
  -7   7 -10  151.99    9.57
  -7   7 -10  151.48    8.29
  -7   7 -11   91.77    6.50
  -7   7 -11   88.52    5.85
  -7   7 -12  147.43    6.49
  -7   6  15  179.42    7.20
  -7   6  14  231.06    9.68
  -7   6  13   31.12    4.32
  -7   6  12  203.61    9.37
  -7   6  12  187.34   10.52
  -7   6  11    0.31    1.40
  -7   6  10  694.28   20.43
  -7   6  10  689.74   21.47
  -7   6   9  816.88   23.19
  -7   6   9  825.62   23.45
  -7   6   8    9.96    3.27
  -7   6   8   13.59    3.81
  -7   6   7 1364.97   31.90
  -7   6   7 1271.53   26.79
  -7   6   6   33.32    4.40
  -7   6   6   32.74    4.95
  -7   6   5  575.87   18.81
  -7   6   4  747.58   20.70
  -7   6   3  189.65   10.29
  -7   6   2  764.51   20.04
  -7   6   1  118.98    8.04
  -7   6   0  725.75   21.04
  -7   6   0  676.19   18.95
  -7   6  -1 1194.69   27.69
  -7   6  -2   53.12    6.53
  -7   6  -3  240.34   12.57
  -7   6  -3  258.75   13.77
  -7   6  -3  254.97   13.06
  -7   6  -4   69.67    7.44
  -7   6  -4   78.88    8.09
  -7   6  -4   70.14    7.26
  -7   6  -5  134.73   10.11
  -7   6  -6  393.57   17.22
  -7   6  -7  244.71   13.36
  -7   6  -8   53.02    6.58
  -7   6  -9    4.52    2.89
  -7   6 -10  164.55   10.06
  -7   6 -11  109.79    7.16
  -7   6 -12   87.03    5.18
  -7   6 -12   78.15    4.23
  -7   5  16  156.37    6.04
  -7   5  15    1.18    1.57
  -7   5  14  590.87   16.78
  -7   5  13    4.68    2.71
  -7   5  12  628.49   19.73
  -7   5  11  973.31   22.97
  -7   5  11  959.18   25.16
  -7   5  10    7.18    2.99
  -7   5  10    8.78    3.13
  -7   5   9  155.89   10.08
  -7   5   9  146.93    9.96
  -7   5   9  143.56   10.86
  -7   5   8  510.31   17.47
  -7   5   8  502.16   17.84
  -7   5   8  518.27   19.49
  -7   5   7  351.82   14.10
  -7   5   7  353.16   15.56
  -7   5   6 2491.97   38.91
  -7   5   5    3.30    1.79
  -7   5   4  736.19   19.38
  -7   5   3  214.96   10.33
  -7   5   2  456.58   14.87
  -7   5   2  488.75   15.73
  -7   5   1  354.92   13.77
  -7   5   1  345.27   12.91
  -7   5   0    7.73    2.40
  -7   5   0    6.88    2.06
  -7   5  -1  290.20   13.02
  -7   5  -2   44.31    5.47
  -7   5  -3   15.06    3.54
  -7   5  -3   12.44    3.05
  -7   5  -4  241.53   13.01
  -7   5  -4  254.40   13.46
   7  -5   5  533.89   18.42
  -7   5  -5  575.35   20.60
  -7   5  -5  563.61   20.35
   7  -5   6  192.34   11.36
  -7   5  -6  196.24   12.30
   7  -5   7  179.26   11.07
  -7   5  -7  159.17   10.94
   7  -5   8  181.59   11.04
  -7   5  -8  176.20   10.95
   7  -5   9  257.11   12.50
  -7   5  -9  244.89   11.54
   7  -5  10    3.88    1.76
   7  -5  11   73.06    5.30
  -7   5 -11   77.33    6.04
  -7   5 -12    9.01    1.88
   7  -5  12    7.61    1.51
  -7   4  16  225.56    8.15
  -7   4  15  398.22   11.24
  -7   4  15  425.46   13.44
  -7   4  14  423.02   13.51
  -7   4  14  424.52   15.00
  -7   4  13  485.14   15.66
  -7   4  13  477.70   17.14
  -7   4  12   38.19    4.71
  -7   4  12   45.28    5.87
  -7   4  11 1031.75   23.83
  -7   4  11 1020.95   26.08
  -7   4  10  294.61   14.04
  -7   4   9   19.75    4.64
  -7   4   9   20.09    3.76
  -7   4   9   23.65    3.80
  -7   4   8  751.44   20.76
  -7   4   8  694.69   21.42
  -7   4   7  214.24   11.56
  -7   4   6 1859.05   31.95
  -7   4   5 1739.67   29.29
  -7   4   4  461.69   14.67
  -7   4   3  203.35    9.55
  -7   4   2   83.91    6.24
  -7   4   2   91.51    6.68
  -7   4   1  230.57   10.14
  -7   4   1  234.61   10.71
  -7   4   0  325.17   12.29
  -7   4   0  335.94   13.04
  -7   4  -1  843.91   21.27
  -7   4  -2   59.21    5.84
  -7   4  -3   10.42    2.98
  -7   4  -4   27.52    4.56
   7  -4   4   25.54    4.16
  -7   4  -4   33.14    5.50
  -7   4  -5    6.91    3.08
   7  -4   5    4.98    2.66
   7  -4   6  464.15   17.93
  -7   4  -6  461.15   18.30
   7  -4   7  385.06   16.51
  -7   4  -7  404.62   16.76
   7  -4   8  172.67   10.91
  -7   4  -8  165.41   10.37
   7  -4   9  320.11   14.21
   7  -4  10    4.18    2.26
   7  -4  11  382.34   12.41
   7  -4  12  681.00   13.10
  -7   4 -12  699.43   13.97
  -7   3  17  185.81    5.89
  -7   3  16    3.81    1.60
  -7   3  16    2.79    1.29
  -7   3  15  440.76   13.77
  -7   3  15  450.49   14.47
  -7   3  14   57.10    5.64
  -7   3  14   53.60    5.75
  -7   3  14   58.91    6.11
  -7   3  13  743.02   20.82
  -7   3  13  763.67   22.29
  -7   3  12  451.46   17.52
  -7   3  11  243.72   12.86
  -7   3  10  161.00   10.32
  -7   3  10  167.20   10.99
  -7   3   9    8.69    2.86
  -7   3   9    4.07    2.67
  -7   3   9    3.94    2.00
  -7   3   8  323.09   13.87
  -7   3   7 1758.93   28.99
  -7   3   7 1761.96   30.75
  -7   3   6  149.68    8.43
  -7   3   6  147.68    8.80
  -7   3   5  965.54   20.75
  -7   3   5 1005.61   20.98
  -7   3   4   94.73    6.38
  -7   3   3  486.10   13.99
  -7   3   2  602.31   15.50
  -7   3   1   20.34    3.14
  -7   3   1   16.93    3.21
  -7   3   0  596.26   16.90
  -7   3  -1  129.01    8.12
  -7   3  -2   42.74    4.95
  -7   3  -3   28.64    4.63
   7  -3   4   56.03    6.01
  -7   3  -4   56.98    6.09
  -7   3  -4   68.48    7.27
   7  -3   5  120.72    9.28
  -7   3  -5  130.13    9.75
  -7   3  -5  121.76    9.75
  -7   3  -6   14.40    3.88
   7  -3   6    9.60    3.48
   7  -3   7  843.69   24.75
   7  -3   8  300.88   14.64
   7  -3   9  502.00   18.01
   7  -3  10  215.61   10.86
   7  -3  11   44.18    4.47
   7  -3  12  414.46   10.35
  -7   2  17  383.69   10.29
  -7   2  17  352.02    8.49
  -7   2  16    3.73    1.93
  -7   2  16   -1.06    1.38
  -7   2  15  182.37    9.75
  -7   2  15  181.21    9.37
  -7   2  15  188.21   10.42
  -7   2  14  290.16   13.14
  -7   2  14  283.29   13.54
  -7   2  13   13.03    3.47
  -7   2  12 1563.95   32.53
  -7   2  11  653.33   21.50
  -7   2  11  672.35   21.20
  -7   2  10  149.93   10.06
  -7   2  10  158.90   10.05
  -7   2   9  888.37   22.93
  -7   2   8   74.54    6.27
  -7   2   8   79.43    6.71
  -7   2   7 1265.99   24.51
  -7   2   7 1245.05   24.67
  -7   2   6  632.91   16.97
  -7   2   6  673.14   17.25
  -7   2   5  468.49   13.77
  -7   2   5  483.81   14.42
  -7   2   4  146.85    7.47
  -7   2   4  148.21    7.94
  -7   2   3    8.51    2.07
  -7   2   2   22.43    3.15
  -7   2   1   19.40    2.40
  -7   2   1   30.29    3.46
  -7   2   0  697.98   15.36
  -7   2   0  658.29   17.56
  -7   2  -1   13.00    2.78
  -7   2  -1   18.10    2.88
  -7   2  -2  630.00   18.27
  -7   2  -2  639.73   16.89
  -7   2  -3    9.91    2.78
   7  -2   4   14.82    3.86
  -7   2  -4   23.05    4.25
  -7   2  -4   23.53    4.38
   7  -2   5  690.73   22.04
  -7   2  -5  706.10   21.89
   7  -2   6  994.25   27.00
   7  -2   7   19.30    4.44
   7  -2   8  722.24   22.66
   7  -2   9    8.19    2.98
   7  -2  10 1209.22   25.25
   7  -2  11   53.73    4.81
   7  -2  12   33.14    3.02
  -7   1  18  168.24    6.00
  -7   1  17  322.08   10.63
  -7   1  16   61.45    5.64
  -7   1  16   66.78    4.84
  -7   1  15   57.97    6.15
  -7   1  15   55.54    5.46
  -7   1  15   61.78    6.31
  -7   1  14  443.01   16.99
  -7   1  13 1280.89   29.49
  -7   1  12    3.16    2.22
  -7   1  11 1393.90   30.19
  -7   1  11 1469.52   31.00
  -7   1  10    7.18    2.67
  -7   1  10    1.41    2.36
  -7   1  10    8.44    2.64
  -7   1   9 1792.21   31.27
  -7   1   9 1840.51   31.56
  -7   1   8  801.59   20.49
  -7   1   8  825.02   19.96
  -7   1   7  173.23    9.16
  -7   1   7  182.47    8.91
  -7   1   6   35.99    3.91
  -7   1   6   39.25    4.45
  -7   1   5    4.05    1.81
  -7   1   5    5.09    1.55
  -7   1   4  170.03    8.44
  -7   1   4  174.65    7.73
  -7   1   3    4.91    1.75
  -7   1   3    7.01    1.90
  -7   1   2   10.54    2.02
  -7   1   2   12.31    2.13
  -7   1   1   94.92    5.83
  -7   1   0  520.82   14.15
  -7   1  -1  365.32   12.41
  -7   1  -1  379.47   13.76
  -7   1  -2   33.99    4.34
  -7   1  -2   40.44    4.87
  -7   1  -3  465.63   16.48
   7  -1   3  508.18   17.97
  -7   1  -3  493.08   16.18
   7  -1   4  307.07   14.40
  -7   1  -4  292.28   13.63
  -7   1  -4  280.27   12.95
  -7   1  -5   10.41    3.69
  -7   1  -5    5.25    2.35
   7  -1   5    8.54    3.05
   7  -1   6  888.37   25.76
   7  -1   7  117.74    9.53
   7  -1   8  580.71   20.18
   7  -1   9  628.63   19.67
   7  -1  10  426.06   14.48
   7  -1  11  378.92   11.59
   7  -1  12   28.24    2.39
  -7   0  18  488.51   11.42
  -7   0  17   24.50    3.51
  -7   0  16  395.02   14.34
  -7   0  15  374.01   15.11
  -7   0  15  342.29   12.37
  -7   0  15  366.84   14.85
  -7   0  14   39.89    5.60
  -7   0  13  469.91   18.00
  -7   0  12  435.28   17.16
  -7   0  11  581.70   19.31
  -7   0  11  588.28   18.73
  -7   0  10  911.60   23.61
  -7   0  10  933.79   22.50
  -7   0   9  190.89   10.48
  -7   0   9  181.54    9.61
  -7   0   8  676.06   19.04
  -7   0   8  641.45   16.68
  -7   0   7   79.80    6.44
  -7   0   7   94.33    6.12
  -7   0   6   18.73    2.54
  -7   0   6   17.03    3.20
  -7   0   5  153.06    6.98
  -7   0   5  151.74    8.19
  -7   0   4  319.60    9.72
  -7   0   4  329.97   11.87
  -7   0   3    0.35    1.27
  -7   0   3    0.24    1.03
  -7   0   2   62.75    4.92
  -7   0   1  646.11   15.92
  -7   0   0   64.69    5.31
  -7   0  -1   33.10    4.10
  -7   0  -1   37.91    4.49
  -7   0  -2  336.31   13.24
  -7   0  -2  368.51   14.24
  -7   0  -3    6.30    2.30
  -7   0  -3    6.16    2.27
   7   0   3    8.05    2.54
   7   0   4 1457.24   32.01
  -7   0  -4 1480.32   30.40
   7   0   5  393.56   17.11
   7   0   6  206.95   12.70
   7   0   7  677.51   22.13
   7   0   8   82.07    7.71
   7   0   9 1284.32   26.90
   7   0  10   22.53    3.45
   7   0  11   55.56    4.05
  -7  -1  18   90.59    5.29
  -7  -1  17  322.86   11.78
  -7  -1  16   -1.21    2.25
  -7  -1  16    3.18    1.70
  -7  -1  15  718.98   21.13
  -7  -1  15  694.40   20.22
  -7  -1  14  425.45   16.64
  -7  -1  13  106.86    8.57
  -7  -1  12  962.90   25.24
  -7  -1  11   25.44    4.34
  -7  -1  11   20.19    4.27
  -7  -1  10  928.09   24.25
  -7  -1  10 1069.82   25.43
  -7  -1   9  209.10   11.19
  -7  -1   8  119.12    8.16
  -7  -1   7   51.31    5.31
  -7  -1   6  307.42   12.23
  -7  -1   5    0.58    1.11
  -7  -1   4  647.29   16.97
  -7  -1   3   60.71    5.22
  -7  -1   2   46.16    4.59
  -7  -1   1  201.76    9.50
  -7  -1   0  448.21   14.82
  -7  -1  -1  471.13   15.78
  -7  -1  -1  506.82   16.28
  -7  -1  -2 1035.05   24.25
  -7  -1  -2 1088.74   24.51
  -7  -1  -3 1373.06   28.39
   7   1   3 1360.01   30.38
  -7  -1  -3 1290.46   28.26
   7   1   4 1351.33   31.19
   7   1   5  994.68   27.15
   7   1   6   17.24    4.05
   7   1   7  598.92   20.29
   7   1   8   32.47    4.79
   7   1   9  188.28    9.69
   7   1  10  184.35    8.10
  -7  -2  18   18.95    2.68
  -7  -2  17  471.94   14.20
  -7  -2  16  994.51   22.95
  -7  -2  16  976.76   21.33
  -7  -2  15  264.60   12.16
  -7  -2  14  772.71   21.83
  -7  -2  13   12.52    3.47
   7   2 -12  337.24   13.95
  -7  -2  12  342.34   14.95
   7   2 -11  153.76    9.50
  -7  -2  11  163.69   10.71
  -7  -2  11  177.87   10.66
  -7  -2  10  165.59   10.60
  -7  -2  10  162.93    9.96
  -7  -2   9  395.36   15.71
  -7  -2   8   59.65    6.26
  -7  -2   7   48.64    5.39
  -7  -2   6  104.73    7.42
  -7  -2   5  159.38    8.84
  -7  -2   4    9.85    2.79
  -7  -2   3  619.28   16.82
  -7  -2   2  401.81   13.98
  -7  -2   1  305.06   12.47
  -7  -2   0   49.54    5.40
   7   2   1  345.37   14.59
  -7  -2  -1  336.59   14.09
  -7  -2  -1  344.97   13.61
   7   2   2  226.77   12.24
  -7  -2  -2  217.73   11.80
  -7  -2  -2  213.42   10.93
   7   2   3 2934.34   45.05
  -7  -2  -3 3049.70   45.37
   7   2   4    3.73    2.57
   7   2   5  411.21   17.23
   7   2   6   34.28    5.41
   7   2   7  150.77    9.92
   7   2   8  347.65   13.45
   7   2   9  149.20    7.60
   7   2  10    2.22    1.21
   7   2  10    2.45    1.22
  -7  -3  18  648.21   13.55
  -7  -3  17    7.39    2.42
  -7  -3  16 1111.36   23.71
   7   3 -16 1098.44   20.97
  -7  -3  16 1075.96   21.12
  -7  -3  15   40.46    4.98
   7   3 -14  749.69   20.42
  -7  -3  14  730.83   20.44
   7   3 -13   84.72    7.51
  -7  -3  13   81.68    7.29
   7   3 -12   64.62    6.40
  -7  -3  12   64.29    6.68
   7   3 -11  139.14    9.47
  -7  -3  11  132.64    9.90
  -7  -3  11  142.55    9.52
   7   3 -10  231.47   11.92
  -7  -3  10  251.52   13.26
  -7  -3  10  240.07   12.06
   7   3  -9  119.02    8.47
  -7  -3   9  123.98    9.04
  -7  -3   9  127.58    8.63
  -7  -3   8   72.72    6.93
  -7  -3   7    3.49    1.63
  -7  -3   6   22.71    3.69
  -7  -3   5    4.23    2.20
  -7  -3   4 2277.86   33.31
  -7  -3   3  211.41   10.14
  -7  -3   3  216.62   10.87
  -7  -3   2   98.24    7.52
  -7  -3   1  189.21   10.44
  -7  -3   0    8.31    2.65
   7   3   0    1.08    1.25
  -7  -3   0    8.40    2.60
   7   3   1 1397.33   29.77
  -7  -3  -1 1407.62   30.21
  -7  -3  -1 1342.41   26.87
   7   3   2  566.82   19.42
   7   3   3  730.53   22.51
   7   3   4  880.45   24.71
   7   3   5  158.68   10.40
   7   3   6  592.45   18.98
   7   3   7   16.39    3.15
   7   3   8    5.40    2.14
   7   3   9  177.67    6.53
   7   3   9  202.81    7.87
  -7  -4  18  378.13    9.53
  -7  -4  17  482.13   13.21
   7   4 -17  473.28   11.77
  -7  -4  16  180.74    9.31
   7   4 -16  168.69    8.54
  -7  -4  15  376.28   14.49
  -7  -4  15  347.70   12.44
   7   4 -14   37.56    5.05
  -7  -4  14   31.33    4.52
   7   4 -13  172.62   10.55
  -7  -4  13  176.51   10.16
   7   4 -12   10.14    2.98
  -7  -4  12   14.86    3.06
   7   4 -11   11.93    3.16
  -7  -4  11   14.21    3.28
   7   4 -10   31.58    4.65
  -7  -4  10   29.03    5.19
  -7  -4  10   33.67    4.44
   7   4  -9  928.98   24.16
  -7  -4   9  899.38   24.85
  -7  -4   9  922.90   23.04
   7   4  -8   29.91    4.53
  -7  -4   8   34.32    4.94
  -7  -4   8   26.83    4.08
   7   4  -7    5.42    1.82
  -7  -4   7    3.29    2.18
  -7  -4   7    7.64    2.56
  -7  -4   6  125.03    8.45
   7   4  -6  145.56    9.24
  -7  -4   5   77.36    6.61
  -7  -4   4  106.71    7.55
   7   4  -4  114.49    8.22
  -7  -4   3 1661.63   28.59
  -7  -4   3 1633.80   31.41
   7   4  -3 1712.73   31.52
  -7  -4   2   18.51    3.56
   7   4  -2   14.45    3.74
   7   4  -2   22.94    4.20
  -7  -4   1 1584.68   31.89
   7   4  -1 1580.08   31.44
   7   4   0  155.77    9.94
  -7  -4   0  158.96   10.57
   7   4   0  157.88   10.32
   7   4   1  804.56   22.62
   7   4   2 1207.19   28.05
   7   4   3   47.68    5.54
   7   4   4  410.33   16.13
   7   4   5   42.02    5.23
   7   4   6  411.82   14.11
   7   4   7  102.38    6.24
   7   4   7  108.88    7.28
   7   4   8   34.89    3.76
   7   4   9    1.84    0.94
  -7  -5  17  554.15   12.72
   7   5 -17  580.62   13.27
  -7  -5  16    1.54    1.72
   7   5 -16    2.62    1.94
   7   5 -15  308.19   12.67
  -7  -5  15  316.03   12.52
   7   5 -14   90.47    7.67
   7   5 -13    5.63    2.67
   7   5 -12   23.18    4.57
   7   5 -11   29.77    4.92
  -7  -5  11   24.52    4.13
   7   5 -10  686.08   21.54
  -7  -5  10  664.59   19.32
   7   5  -9    9.01    2.97
  -7  -5   9    5.66    2.35
   7   5  -8    5.96    2.50
  -7  -5   8    2.34    2.13
  -7  -5   8    6.91    2.58
   7   5  -7  134.63    9.48
  -7  -5   7  150.86    9.74
  -7  -5   7  132.57    8.75
  -7  -5   6  292.42   13.11
   7   5  -6  300.99   13.74
  -7  -5   5  991.19   23.27
   7   5  -5 1019.71   24.85
  -7  -5   4  473.87   17.61
   7   5  -4  472.34   17.06
  -7  -5   4  462.62   15.59
  -7  -5   3  110.46    8.73
   7   5  -3  114.99    8.77
  -7  -5   2 1038.33   26.43
   7   5  -2 1019.52   25.61
   7   5  -1  808.09   23.42
   7   5   0 2510.32   41.54
   7   5   1   38.65    5.62
   7   5   2   51.97    6.06
   7   5   3   61.85    6.93
   7   5   4   47.48    5.95
   7   5   5  401.15   15.34
   7   5   6   55.42    5.43
   7   5   7    4.14    1.76
   7   5   8   36.44    2.92
   7   6 -17   80.43    4.88
  -7  -6  16   12.97    2.25
   7   6 -16   13.02    2.57
   7   6 -15    5.31    2.10
  -7  -6  15   11.95    2.30
   7   6 -14   28.37    4.55
  -7  -6  14   19.81    3.09
   7   6 -13  136.54    9.47
   7   6 -12    6.59    3.20
   7   6 -11   45.99    6.01
   7   6 -10  114.57    9.15
   7   6  -9    2.19    1.83
   7   6  -8   13.76    3.88
   7   6  -7  462.09   17.72
  -7  -6   7  468.54   16.13
   7   6  -6   78.92    7.27
  -7  -6   6   86.36    7.23
   7   6  -5  343.01   14.71
   7   6  -4 1056.58   26.05
   7   6  -3   -0.85    2.00
   7   6  -2  890.02   24.42
   7   6  -1   76.43    7.56
   7   6   0 1267.88   29.72
   7   6   1  216.66   12.34
   7   6   2   33.35    5.14
   7   6   3   25.10    4.30
   7   6   4   79.38    6.92
   7   6   5   38.74    4.68
   7   6   6  465.48   12.79
   7   6   7   43.99    3.15
   7   7 -17    0.08    0.97
   7   7 -16   48.02    4.42
   7   7 -15   74.01    5.92
   7   7 -14    9.15    2.98
   7   7 -13  159.94    9.94
   7   7 -12    8.21    3.19
   7   7 -11    8.13    3.25
   7   7 -10    5.58    2.94
   7   7  -9   66.78    7.23
   7   7  -8  516.21   19.02
   7   7  -7  284.63   14.24
   7   7  -6 1506.36   32.51
   7   7  -5    9.91    3.41
   7   7  -4  288.44   13.54
   7   7  -3   72.50    7.13
   7   7  -2  837.28   23.32
   7   7  -1  885.05   24.07
   7   7   0    5.66    2.93
   7   7   1   25.66    4.48
   7   7   2   62.79    6.38
   7   7   3  254.82   11.54
   7   7   4  203.46    9.32
   7   7   5  152.96    6.96
   7   8 -16    8.40    1.96
   7   8 -15   68.40    5.16
   7   8 -15   67.43    5.22
   7   8 -14  437.25   14.15
   7   8 -13   48.13    5.38
   7   8 -12   -3.23    2.54
   7   8 -11   18.12    4.06
   7   8 -10  335.17   14.84
   7   8  -9    8.78    3.25
   7   8  -8  699.24   21.85
   7   8  -7    9.38    3.37
   7   8  -6 1042.22   27.12
   7   8  -5  257.95   13.67
   7   8  -4  328.29   14.18
   7   8  -3  467.73   16.73
   7   8  -2   29.52    4.76
   7   8  -1  513.14   17.35
   7   8   0  184.78   10.23
   7   8   1    2.77    2.32
   7   8   2  164.25    8.60
   7   8   3   -1.33    1.43
   7   8   4   33.97    2.90
   7   9 -16   56.89    3.35
   7   9 -15   32.29    3.26
   7   9 -14   36.95    3.19
   7   9 -14   40.31    4.03
   7   9 -14   41.36    4.19
   7   9 -13  127.71    7.62
   7   9 -12   10.29    2.81
   7   9 -11   17.26    3.81
   7   9 -10   92.12    7.68
   7   9  -9  133.77    9.27
   7   9  -8  588.95   19.40
   7   9  -7  993.42   25.31
   7   9  -6   96.53    8.44
   7   9  -5  309.03   14.57
   7   9  -4   27.52    4.77
   7   9  -3  419.11   16.55
   7   9  -2  176.03   10.62
   7   9  -2  171.31    9.24
   7   9  -1   48.98    5.62
   7   9  -1   43.19    4.74
   7   9   0   55.45    5.35
   7   9   0   60.18    5.00
   7   9   1   42.38    3.95
   7   9   1   41.41    4.05
   7   9   2  148.74    5.87
   7  10 -14   61.99    3.82
   7  10 -13    6.19    1.61
   7  10 -13    7.41    1.98
   7  10 -13    7.77    1.95
   7  10 -12   45.31    4.45
   7  10 -12   44.99    4.15
   7  10 -11  135.10    7.97
   7  10 -10  263.13   11.34
   7  10  -9  661.59   18.55
   7  10  -8    7.66    3.30
   7  10  -7  698.21   19.69
   7  10  -6   65.83    6.44
   7  10  -5  268.72   12.26
   7  10  -4  183.25    9.93
   7  10  -3   25.39    3.89
   7  10  -2   24.17    3.60
   7  10  -1  129.16    6.59
   7  11 -12   52.68    3.67
   7  11 -12   48.24    3.49
   7  11 -11  377.54   10.53
   7  11 -10   48.20    4.30
   7  11  -9  433.37   12.63
   7  11  -8  153.64    7.82
   7  11  -7   25.52    3.55
   7  11  -6  172.94    8.13
   7  11  -5    2.01    1.09
   7  11  -4  325.72    9.61
  -8  13   6   11.14    1.99
  -8  13   5   15.72    2.72
  -8  13   4   66.40    5.15
  -8  13   3   30.38    3.80
  -8  13   2    1.09    0.93
  -8  13   1   79.24    6.64
  -8  13   1   69.86    5.03
  -8  13   0   99.48    7.69
  -8  13   0  105.80    6.44
  -8  13  -1    7.46    2.15
  -8  13  -1    6.70    2.87
  -8  13  -2  174.81    8.24
  -8  13  -2  181.29   10.15
  -8  13  -3   55.37    4.64
  -8  13  -3   56.86    5.63
  -8  13  -4  116.73    6.60
  -8  13  -4  116.65    7.49
  -8  13  -5  218.78    9.01
  -8  13  -5  168.41    6.47
  -8  12   8   55.30    3.89
  -8  12   7    0.59    1.48
  -8  12   6   13.76    2.97
  -8  12   5  134.68    8.78
  -8  12   4   14.27    3.58
  -8  12   3   34.71    5.03
  -8  12   3   41.75    5.17
  -8  12   2    0.94    0.88
  -8  12   2   -0.74    1.81
  -8  12   2    2.90    2.46
  -8  12   1   56.68    5.14
  -8  12   1   62.93    5.86
  -8  12   1   57.44    6.32
  -8  12   0  191.70    9.36
  -8  12   0  192.97   11.32
  -8  12  -1  373.06   13.05
  -8  12  -1  395.03   16.11
  -8  12  -2   46.03    5.83
  -8  12  -3  355.80   15.30
  -8  12  -3  349.36   11.90
  -8  12  -4    5.70    2.53
  -8  12  -4    3.95    2.84
  -8  12  -5  926.78   22.59
  -8  12  -5  979.00   20.08
  -8  12  -6  336.60   12.23
  -8  12  -6  345.43   11.47
  -8  12  -7    3.56    1.81
  -8  12  -7    7.07    1.98
  -8  12  -8  102.79    5.04
  -8  11  10    2.07    0.95
  -8  11   9  158.85    6.98
  -8  11   8    2.17    2.03
  -8  11   7   61.09    5.86
  -8  11   6   86.00    7.79
  -8  11   5    8.34    3.32
  -8  11   4    6.43    3.31
  -8  11   4   12.91    3.06
  -8  11   3    7.33    3.48
  -8  11   3    4.19    2.35
  -8  11   2  233.67   10.35
  -8  11   2  250.71   13.70
  -8  11   2  273.48   13.25
  -8  11   1  116.49    7.61
  -8  11   1  111.84    8.89
  -8  11   1  120.89    9.11
  -8  11   0    3.04    3.13
  -8  11  -1  753.01   23.19
  -8  11  -2  317.37   15.37
  -8  11  -2  291.74   12.10
  -8  11  -3  618.98   21.51
  -8  11  -3  593.87   17.74
  -8  11  -4  499.31   19.23
  -8  11  -4  510.46   16.71
  -8  11  -5  229.87   12.73
  -8  11  -5  236.25   11.25
  -8  11  -6  416.89   15.83
  -8  11  -6  445.12   14.80
  -8  11  -7   10.71    2.68
  -8  11  -7   11.43    2.85
  -8  11  -8  151.99    7.10
  -8  11  -8  163.16    7.55
  -8  10  11    0.19    0.90
  -8  10  10  216.89    8.36
  -8  10  10  205.80    7.75
  -8  10   9   30.90    3.93
  -8  10   9   30.99    3.77
  -8  10   8   15.63    3.65
  -8  10   7   71.58    7.16
  -8  10   6    6.26    3.21
  -8  10   5   20.41    4.66
  -8  10   5   11.00    2.96
  -8  10   4   51.57    7.16
  -8  10   4   52.51    6.08
  -8  10   3  413.75   19.15
  -8  10   3  507.15   17.89
  -8  10   2   13.89    3.86
  -8  10   2   18.72    4.23
  -8  10   1  872.70   25.62
  -8  10   1  818.29   23.68
  -8  10   0  441.52   17.90
  -8  10  -1  213.25   12.94
  -8  10  -1  229.65   11.15
  -8  10  -2  377.62   17.43
  -8  10  -2  360.47   14.65
  -8  10  -3  365.23   17.51
  -8  10  -3  387.10   15.44
  -8  10  -4 1365.15   33.63
  -8  10  -4 1341.09   29.00
  -8  10  -5  172.24   12.00
  -8  10  -5  179.00   10.59
  -8  10  -6   76.20    7.92
  -8  10  -6   69.83    6.81
  -8  10  -7    5.18    2.41
  -8  10  -7    5.32    2.70
  -8  10  -8   77.36    6.12
  -8  10  -8   73.20    5.73
  -8  10  -9   95.41    5.41
  -8  10  -9   99.77    5.79
  -8   9  12    0.78    0.39
  -8   9  12    3.62    1.28
  -8   9  11    4.28    1.44
  -8   9  11    2.76    1.76
  -8   9  10   33.93    4.10
  -8   9  10   37.42    4.39
  -8   9   9   79.14    6.78
  -8   9   9   83.28    6.92
  -8   9   8  175.78   10.87
  -8   9   8  165.98    9.98
  -8   9   7   52.85    6.55
  -8   9   7   60.47    6.47
  -8   9   6    4.79    2.93
  -8   9   6    9.11    2.83
  -8   9   5   82.44    9.09
  -8   9   5   96.18    7.77
  -8   9   4    5.33    3.06
  -8   9   4    0.91    2.13
  -8   9   3 1134.25   32.62
  -8   9   3 1372.62   29.17
  -8   9   2  279.18   16.01
  -8   9   2  291.40   13.95
  -8   9   1   78.59    8.35
  -8   9   1   61.96    6.79
  -8   9   0  207.49   12.41
  -8   9  -1   59.53    7.43
  -8   9  -1   68.36    6.74
  -8   9  -2  961.54   27.96
  -8   9  -2  936.51   24.55
  -8   9  -3  253.08   15.03
  -8   9  -3  259.57   13.42
  -8   9  -4   60.37    7.79
  -8   9  -4   70.02    7.34
  -8   9  -5  632.20   20.70
  -8   9  -5  617.84   23.40
  -8   9  -5  611.98   20.40
  -8   9  -6   23.39    4.43
  -8   9  -6   20.48    5.02
  -8   9  -6   29.05    5.14
  -8   9  -7  261.97   12.80
  -8   9  -7  278.42   14.45
  -8   9  -7  286.36   12.94
  -8   9  -8   12.74    3.26
  -8   9  -8   13.52    2.97
  -8   9  -8   14.03    3.33
  -8   9  -9   37.91    4.30
  -8   9  -9   39.20    4.32
  -8   9  -9   38.89    4.14
  -8   9 -10   68.22    4.02
  -8   8  14  186.97    5.67
  -8   8  13   20.28    2.75
  -8   8  12    9.02    1.70
  -8   8  12    7.76    2.28
  -8   8  11   26.89    3.41
  -8   8  11   30.42    4.30
  -8   8  10  302.79   12.61
  -8   8  10  266.15   12.31
  -8   8   9    9.29    3.01
  -8   8   8  320.81   15.29
  -8   8   7   68.94    7.65
  -8   8   7   62.07    6.18
  -8   8   6   68.16    8.23
  -8   8   6   63.51    6.21
  -8   8   5  180.95   13.44
  -8   8   5  181.52   10.35
  -8   8   4  575.61   23.55
  -8   8   4  631.23   19.15
  -8   8   3   -0.19    2.49
  -8   8   3    6.25    2.36
  -8   8   2 1957.49   34.99
  -8   8   2 1948.14   33.12
  -8   8   1   10.90    3.39
  -8   8   1    8.43    3.54
  -8   8   1   14.76    3.56
  -8   8   0 1006.26   26.87
  -8   8   0  959.00   23.82
  -8   8   0 1038.02   24.69
  -8   8  -1  750.90   23.96
  -8   8  -1  760.39   21.92
  -8   8  -2  188.92   12.61
  -8   8  -2  194.76   11.55
  -8   8  -3  980.40   25.00
  -8   8  -3  996.62   29.73
  -8   8  -3 1014.06   26.66
  -8   8  -4   73.38    7.26
  -8   8  -4   76.93    8.53
  -8   8  -4   74.14    7.68
  -8   8  -5  102.80    8.70
  -8   8  -5   97.33    9.83
  -8   8  -5   96.56    8.54
  -8   8  -6   32.51    5.32
  -8   8  -6   27.40    5.82
  -8   8  -6   30.92    5.33
  -8   8  -7  132.69   10.56
  -8   8  -7  129.43    9.20
  -8   8  -8   81.84    6.86
  -8   8  -8   87.18    7.85
  -8   8  -8   84.92    6.93
  -8   8  -9  309.97   12.06
  -8   8  -9  331.17   12.81
  -8   8  -9  323.26   11.62
  -8   8 -10   68.95    4.83
  -8   8 -10   68.32    4.70
  -8   7  14    8.89    1.92
  -8   7  13   50.87    4.77
  -8   7  12   19.68    2.84
  -8   7  12   19.90    3.56
  -8   7  11    0.43    1.88
  -8   7  11   -0.05    1.79
  -8   7  10  115.20    8.41
  -8   7   9  296.49   14.11
  -8   7   8   14.47    3.73
  -8   7   7   20.47    3.39
  -8   7   7   28.35    5.57
  -8   7   7   19.88    3.69
  -8   7   6  579.78   22.43
  -8   7   6  576.62   17.76
  -8   7   6  543.99   17.78
  -8   7   5    1.93    2.10
  -8   7   5    2.70    2.12
  -8   7   4 2395.78   40.39
  -8   7   4 2375.90   36.00
  -8   7   3  989.49   25.54
  -8   7   3  967.66   23.36
  -8   7   2  722.41   21.49
  -8   7   2  692.64   20.45
  -8   7   2  671.33   19.65
  -8   7   1  676.16   20.84
  -8   7   1  630.04   20.09
  -8   7   1  632.68   19.24
  -8   7   0 1757.85   34.59
  -8   7   0 1629.52   31.20
  -8   7  -1 1105.91   28.53
  -8   7  -1 1133.88   27.03
  -8   7  -2    7.66    3.13
  -8   7  -2   -0.47    2.12
  -8   7  -3    2.54    2.82
  -8   7  -3    5.41    2.89
  -8   7  -3    3.70    2.84
  -8   7  -4  340.15   15.38
  -8   7  -4  353.31   16.23
  -8   7  -5    5.19    2.87
  -8   7  -5    2.63    2.66
  -8   7  -6  141.49   10.40
  -8   7  -6  141.90   10.25
  -8   7  -7  127.11    9.61
  -8   7  -7  124.74    9.25
  -8   7  -8    0.73    2.12
  -8   7  -8    2.14    2.44
  -8   7  -9    7.66    2.36
  -8   7  -9   12.31    3.09
  -8   7 -10   23.54    3.15
  -8   7 -10   25.47    3.40
  -8   7 -11   38.99    2.98
  -8   7 -11   38.53    2.91
  -8   6  15   32.67    3.05
  -8   6  14   99.71    6.29
  -8   6  13    2.48    1.94
  -8   6  12   25.86    3.52
  -8   6  12   23.07    4.11
  -8   6  11   86.11    6.92
  -8   6  11   84.60    7.20
  -8   6  10    1.55    2.23
  -8   6  10    8.91    2.78
  -8   6   9  143.82   10.05
  -8   6   9  141.84    9.75
  -8   6   8  919.70   23.60
  -8   6   7  160.56    9.84
  -8   6   6  535.73   19.34
  -8   6   6  513.61   17.27
  -8   6   5  211.68   11.89
  -8   6   5  217.10   10.42
  -8   6   5  206.59   10.94
  -8   6   4  751.15   21.77
  -8   6   4  733.55   19.26
  -8   6   4  772.71   20.85
  -8   6   3 1787.18   32.97
  -8   6   3 1772.90   30.65
  -8   6   3 1793.53   31.55
  -8   6   2   15.18    3.48
  -8   6   2   13.03    3.16
  -8   6   2    5.17    3.17
  -8   6   1 1232.97   27.33
  -8   6   1 1280.50   27.66
  -8   6   1 1202.40   25.71
  -8   6   0  378.41   16.54
  -8   6   0  389.67   15.91
  -8   6   0  382.61   15.20
  -8   6  -1  230.37   13.27
  -8   6  -1  250.50   12.87
  -8   6  -2   71.36    7.71
  -8   6  -2   67.72    6.86
  -8   6  -3    6.25    3.00
  -8   6  -4   12.74    4.27
  -8   6  -4   13.99    3.69
  -8   6  -5  149.60   10.43
  -8   6  -5  142.79   10.55
  -8   6  -6    5.32    3.68
  -8   6  -6    2.67    3.15
  -8   6  -7  271.21   13.89
  -8   6  -7  291.54   13.97
  -8   6  -8   57.82    6.27
  -8   6  -8   44.01    5.56
  -8   6  -9   64.09    5.86
  -8   6 -10   79.38    5.58
  -8   6 -11   24.08    2.47
  -8   6 -11   28.73    2.79
  -8   5  16  139.49    5.45
  -8   5  15   32.64    3.50
  -8   5  14  193.02    9.37
  -8   5  13   21.91    3.66
  -8   5  12   14.51    3.38
  -8   5  12   17.76    3.82
  -8   5  11   28.06    4.37
  -8   5  11   26.04    4.38
  -8   5  10  181.16   10.86
  -8   5  10  187.31   11.28
  -8   5   9  443.06   17.06
  -8   5   8  531.40   19.85
  -8   5   8  545.41   18.43
  -8   5   8  523.14   18.40
  -8   5   7  535.34   19.22
  -8   5   7  546.10   18.11
  -8   5   6 1437.41   30.22
  -8   5   6 1447.44   29.00
  -8   5   5 2525.77   38.84
  -8   5   5 2648.25   38.64
  -8   5   4  229.54   11.56
  -8   5   3  268.56   12.36
  -8   5   2  238.94   11.56
  -8   5   2  241.33   12.21
  -8   5   1  541.35   18.66
  -8   5   1  539.55   17.35
  -8   5   0 1459.76   31.00
  -8   5   0 1508.76   30.07
  -8   5  -1  689.50   21.78
  -8   5  -1  737.40   21.92
  -8   5  -2   68.52    7.34
  -8   5  -2   92.55    8.14
  -8   5  -3   94.08    8.52
  -8   5  -3   89.84    8.44
   8  -5   4  159.28   10.40
  -8   5  -4  158.12   11.20
  -8   5  -5   22.92    4.94
   8  -5   5   25.01    4.48
   8  -5   6  350.69   15.06
  -8   5  -6  340.04   15.72
   8  -5   7    3.99    2.37
  -8   5  -7    0.73    2.26
   8  -5   8    4.83    2.27
  -8   5  -9    5.65    2.27
   8  -5   9    5.16    1.69
   8  -5  10   93.80    5.54
  -8   5 -10   89.45    5.88
  -8   5 -11   99.57    4.80
  -8   5 -11  116.01    5.50
  -8   4  16    7.81    1.77
  -8   4  15   47.85    4.54
  -8   4  14    0.65    1.28
  -8   4  14    0.66    1.82
  -8   4  13   27.04    4.03
  -8   4  13   30.16    4.36
  -8   4  12  259.19   11.43
  -8   4  12  268.54   13.09
  -8   4  11   98.64    7.61
  -8   4  11  102.56    8.41
  -8   4  10   27.90    4.68
  -8   4   9 2235.60   37.94
  -8   4   9 2196.75   37.48
  -8   4   9 2252.89   40.70
  -8   4   8   64.01    7.04
  -8   4   8   62.66    6.47
  -8   4   8   51.03    5.75
  -8   4   7 2847.29   42.25
  -8   4   7 2779.29   40.64
  -8   4   6    6.48    2.73
  -8   4   6    6.15    2.78
  -8   4   5 1052.10   23.92
  -8   4   4  779.85   20.23
  -8   4   3   38.96    4.82
  -8   4   3   35.56    4.59
  -8   4   2  237.27   10.92
  -8   4   2  230.95   11.62
  -8   4   1   35.60    4.51
  -8   4   1   31.89    4.48
  -8   4   0  278.11   13.10
  -8   4  -1  703.05   21.27
  -8   4  -1  770.72   22.52
   8  -4   2   55.97    6.17
  -8   4  -2   57.78    6.39
  -8   4  -2   69.87    7.00
   8  -4   3  178.71   10.93
  -8   4  -3  190.27   11.65
  -8   4  -3  181.94   11.79
   8  -4   4   33.04    4.97
  -8   4  -4   34.97    5.46
  -8   4  -5   13.52    4.24
   8  -4   5   12.95    3.49
   8  -4   6   11.86    3.62
   8  -4   7  186.17   11.12
   8  -4   8   90.89    7.53
   8  -4   9    5.41    2.24
   8  -4  10  239.66    9.33
  -8   4 -10  228.90    8.98
   8  -4  11   30.13    2.63
  -8   4 -11   28.56    2.46
  -8   3  16   18.20    2.53
  -8   3  16   20.80    2.67
  -8   3  15    9.37    2.20
  -8   3  15   10.01    2.77
  -8   3  14   97.06    7.01
  -8   3  14   95.95    7.41
  -8   3  13    5.77    2.55
  -8   3  12  875.98   21.02
  -8   3  12  838.86   23.38
  -8   3  11  637.79   20.66
  -8   3  10  308.51   14.21
  -8   3   9 1110.14   26.70
  -8   3   9 1019.97   25.36
  -8   3   9 1041.44   26.57
  -8   3   8 1156.08   26.87
  -8   3   8 1205.50   27.11
  -8   3   7 1794.97   32.07
  -8   3   7 1831.71   31.89
  -8   3   7 1902.31   33.18
  -8   3   6 1352.69   26.70
  -8   3   5   23.90    3.88
  -8   3   4  522.36   15.83
  -8   3   3    1.20    2.07
  -8   3   2  703.13   18.19
  -8   3   2  663.68   19.15
  -8   3   1  570.61   18.12
  -8   3   0 1042.33   24.62
  -8   3  -1  107.16    8.23
  -8   3  -1  120.27    9.04
  -8   3  -2  134.67    9.35
   8  -3   2  126.07    8.93
  -8   3  -2  133.76   10.11
   8  -3   3   23.85    4.45
  -8   3  -3   20.75    3.91
  -8   3  -3   22.64    4.39
   8  -3   4   98.72    8.56
   8  -3   5  511.40   19.15
   8  -3   6  281.16   14.35
   8  -3   7   47.88    5.82
   8  -3   8  380.35   15.16
   8  -3   9   21.76    3.86
   8  -3  10  217.62    8.98
   8  -3  11  202.92    6.73
  -8   2  17   50.55    3.59
  -8   2  17   42.03    2.83
  -8   2  16    7.32    2.10
  -8   2  16    5.77    1.75
  -8   2  15   10.03    2.56
  -8   2  15    9.44    2.59
  -8   2  15    9.66    2.98
  -8   2  14  170.59    9.83
  -8   2  14  172.39   10.31
  -8   2  13 1557.57   31.70
  -8   2  12  301.15   14.32
  -8   2  11  141.99    9.96
  -8   2  10   73.59    7.19
  -8   2  10   70.79    7.06
  -8   2  10   57.91    6.59
  -8   2   9  632.95   19.81
  -8   2   9  594.17   19.26
  -8   2   9  608.33   19.38
  -8   2   8 1596.51   30.24
  -8   2   8 1536.00   29.95
  -8   2   8 1718.64   31.75
  -8   2   8 1645.63   31.05
  -8   2   7   88.04    6.91
  -8   2   7   92.73    7.35
  -8   2   6  743.15   18.90
  -8   2   6  726.20   19.71
  -8   2   5  490.69   14.89
  -8   2   5  491.46   15.98
  -8   2   4  183.35    9.07
  -8   2   3  567.48   15.55
  -8   2   2   74.30    5.76
  -8   2   1   29.29    4.30
  -8   2   0  814.19   21.62
   8  -2   1   43.56    5.34
  -8   2  -1   51.15    5.54
  -8   2  -2    9.67    2.96
   8  -2   2   21.37    4.19
   8  -2   3    8.85    3.03
  -8   2  -3    6.94    2.73
   8  -2   4  230.47   12.96
   8  -2   5   11.97    3.99
   8  -2   6   93.00    8.50
   8  -2   7  233.24   12.75
   8  -2   8  301.34   13.63
   8  -2   9  425.43   14.38
   8  -2  10   51.63    4.47
   8  -2  11  111.95    4.76
  -8   1  18   87.69    3.96
  -8   1  17    0.25    1.24
  -8   1  16   11.16    2.57
  -8   1  16    8.00    1.65
  -8   1  15  400.25   14.67
  -8   1  15  387.19   13.28
  -8   1  15  401.26   14.92
  -8   1  14  409.63   16.01
  -8   1  13  384.43   16.09
  -8   1  12 1678.48   33.81
  -8   1  11  177.89   11.06
  -8   1  10 1169.86   27.10
  -8   1  10 1302.07   28.62
  -8   1  10 1341.50   29.51
  -8   1  10 1180.91   26.59
  -8   1   9    2.31    2.26
  -8   1   9    5.38    2.27
  -8   1   9    9.19    2.68
  -8   1   8  612.71   17.74
  -8   1   8  588.59   18.53
  -8   1   8  610.40   18.94
  -8   1   7  831.97   19.60
  -8   1   7  774.01   20.83
  -8   1   6   25.64    3.43
  -8   1   6   26.68    3.99
  -8   1   5  914.44   19.21
  -8   1   5  860.87   21.09
  -8   1   4  103.34    6.57
  -8   1   4  111.52    6.69
  -8   1   3  315.41   11.12
  -8   1   3  329.39   11.34
  -8   1   2  285.70   10.84
  -8   1   1  170.15    8.63
  -8   1   0   18.34    3.60
  -8   1   0   27.79    3.66
  -8   1  -1   21.39    3.90
   8  -1   1   20.51    3.83
  -8   1  -2    3.46    2.12
   8  -1   2    0.12    1.24
   8  -1   3    0.27    1.76
  -8   1  -3    5.71    2.61
   8  -1   4  205.71   12.50
   8  -1   5  318.44   15.57
   8  -1   6   22.93    4.54
   8  -1   7  664.32   20.99
   8  -1   8   37.55    5.08
   8  -1   9  576.60   16.10
   8  -1  10   88.39    5.32
  -8   0  18    1.98    1.21
  -8   0  17   23.64    3.32
  -8   0  16  131.53    8.07
  -8   0  16  121.15    7.72
  -8   0  15   93.98    7.54
  -8   0  15   93.40    7.59
  -8   0  14 1159.07   27.07
  -8   0  13   22.39    4.48
  -8   0  12 2130.88   38.01
  -8   0  11   83.07    7.72
  -8   0  10 2799.72   41.12
  -8   0  10 2855.82   42.70
  -8   0   9  580.22   18.95
  -8   0   9  615.29   18.82
  -8   0   9  613.55   19.44
  -8   0   8   18.80    3.68
  -8   0   8   22.32    3.85
  -8   0   7   34.90    4.47
  -8   0   6  270.34   12.14
  -8   0   5  332.49   13.21
  -8   0   4  804.61   20.32
  -8   0   3  146.40    8.12
  -8   0   2  308.31   11.90
  -8   0   1   13.05    2.83
   8   0   0   33.24    4.70
  -8   0   0   33.06    4.25
  -8   0   0   35.47    4.77
   8   0   1   75.15    7.14
  -8   0  -1   67.69    6.38
   8   0   1   60.42    6.10
  -8   0  -1   68.94    6.81
  -8   0  -2  200.11   11.44
   8   0   2  212.34   12.14
  -8   0  -2  177.28   10.54
   8   0   3   86.63    8.09
   8   0   4   26.66    4.73
   8   0   5  738.00   23.23
   8   0   6  289.82   14.31
   8   0   7  226.54   12.03
   8   0   8  235.60   11.14
   8   0   8  213.89    9.30
   8   0   9   91.66    6.14
   8   0   9   77.98    4.49
   8   0  10  306.63    8.58
  -8  -1  18   74.67    4.51
  -8  -1  17  362.80   11.81
  -8  -1  16  916.32   21.19
  -8  -1  16  913.67   20.38
  -8  -1  15    8.36    2.86
  -8  -1  14  328.02   14.41
  -8  -1  13  458.73   17.46
  -8  -1  12  249.39   13.18
  -8  -1  11  562.87   19.37
  -8  -1  10    3.90    2.26
  -8  -1  10   15.86    4.15
  -8  -1   9  542.55   18.72
  -8  -1   9  525.93   17.26
  -8  -1   9  570.75   18.88
  -8  -1   8  247.63   12.32
  -8  -1   8  283.73   13.11
  -8  -1   7   89.31    7.34
  -8  -1   6  637.66   18.89
  -8  -1   5  202.32   10.57
  -8  -1   4  581.80   17.53
  -8  -1   3  134.67    8.27
  -8  -1   2   36.08    4.70
   8   1  -1  595.92   18.92
  -8  -1   1  537.65   17.24
   8   1  -1  568.10   18.08
   8   1   0   59.89    6.33
  -8  -1   0   48.72    5.51
  -8  -1   0   53.65    5.97
   8   1   0   56.14    5.80
   8   1   1 1024.92   26.08
   8   1   1  973.21   24.51
  -8  -1  -1 1006.32   24.92
   8   1   2  134.30    9.87
   8   1   3  873.42   25.18
   8   1   4   24.47    4.47
   8   1   5   47.30    6.17
   8   1   6  181.30   11.02
   8   1   7    3.32    2.38
   8   1   8  207.96    9.56
   8   1   8  209.90    8.84
   8   1   9  523.07   12.51
   8   1   9  455.43   10.12
  -8  -2  18  578.88   12.17
  -8  -2  17   28.99    3.68
  -8  -2  16  799.74   19.78
  -8  -2  16  782.36   18.26
  -8  -2  15  170.33    9.55
  -8  -2  14   25.41    4.46
  -8  -2  13  588.10   19.41
  -8  -2  12  205.48   11.83
  -8  -2  11  248.71   12.89
   8   2 -10  947.71   23.13
  -8  -2  10  958.99   25.80
  -8  -2  10  964.63   24.87
   8   2  -9    5.71    2.02
  -8  -2   9    6.55    2.94
   8   2  -8  772.96   20.72
  -8  -2   8  835.28   23.10
  -8  -2   8  845.13   22.56
  -8  -2   7   16.47    3.29
  -8  -2   7   10.72    2.98
  -8  -2   6  125.03    8.58
   8   2  -6  124.26    8.74
  -8  -2   6  129.14    8.74
  -8  -2   5  371.86   14.51
  -8  -2   4  354.28   13.87
  -8  -2   4  324.29   13.49
   8   2  -3   42.32    4.87
  -8  -2   3   40.87    4.93
   8   2  -3   41.43    5.07
   8   2  -2   36.26    4.90
  -8  -2   2   31.57    4.56
   8   2  -2   43.05    5.15
   8   2  -1   70.12    6.76
  -8  -2   1   62.20    6.54
   8   2  -1   65.75    6.69
  -8  -2   0    6.35    2.60
  -8  -2   0    6.94    2.62
   8   2   0    2.74    2.10
   8   2   0    5.45    2.03
   8   2   1  639.32   20.81
   8   2   1  658.89   20.92
   8   2   2  488.33   18.60
   8   2   3  205.40   12.23
   8   2   4  553.18   19.52
   8   2   5  106.86    8.44
   8   2   6   44.29    5.40
   8   2   7  205.98    9.77
   8   2   7  198.03    9.48
   8   2   8    1.75    1.35
   8   2   8    2.24    1.57
  -8  -3  18  468.44   10.45
  -8  -3  17 1110.44   19.76
  -8  -3  16    4.31    2.17
  -8  -3  16    5.03    1.71
  -8  -3  15  452.46   14.70
   8   3 -14    2.37    1.82
  -8  -3  14    4.17    2.24
   8   3 -13  392.06   14.83
  -8  -3  13  383.20   15.18
   8   3 -12  390.50   15.26
  -8  -3  12  390.81   15.74
   8   3 -11   91.09    7.59
  -8  -3  11  102.93    8.25
   8   3 -10  286.98   13.26
  -8  -3  10  279.75   13.34
   8   3  -9  572.06   18.69
  -8  -3   9  560.89   19.62
  -8  -3   9  582.90   19.15
   8   3  -8  120.26    8.65
  -8  -3   8  128.60    9.52
  -8  -3   8  123.08    8.76
   8   3  -7   97.51    7.60
  -8  -3   7   93.41    7.91
  -8  -3   7   98.66    7.91
  -8  -3   6   47.95    5.47
   8   3  -6   57.70    6.28
  -8  -3   6   48.13    5.68
  -8  -3   5   27.02    4.08
   8   3  -5   22.42    3.92
  -8  -3   4   70.11    6.37
  -8  -3   4   67.52    6.54
   8   3  -4   71.68    6.81
   8   3  -3  235.88   11.92
  -8  -3   3  233.72   12.16
   8   3  -3  237.81   12.17
  -8  -3   2    4.97    2.36
   8   3  -2    3.87    2.34
   8   3  -2    9.08    3.20
   8   3  -1   53.90    6.00
  -8  -3   1   66.47    6.82
   8   3  -1   61.78    6.76
   8   3   0   19.67    3.96
   8   3   0   14.20    3.77
   8   3   1    3.46    2.74
   8   3   1    6.49    3.11
   8   3   2 1130.71   27.61
   8   3   2 1174.03   28.48
   8   3   3  534.58   18.85
   8   3   3  542.93   19.26
   8   3   4   96.11    8.02
   8   3   4   95.97    8.03
   8   3   5   99.90    7.52
   8   3   5   93.16    7.52
   8   3   6   70.06    5.79
   8   3   6   73.21    6.22
   8   3   7  150.40    7.14
   8   3   7  165.89    7.91
   8   3   8  312.16    8.63
  -8  -4  18    1.93    0.82
  -8  -4  17  751.45   15.07
   8   4 -17  720.02   13.19
  -8  -4  16  297.62   11.06
  -8  -4  15   72.47    5.39
   8   4 -14  267.55   11.97
  -8  -4  14  257.73   11.25
   8   4 -13    3.94    2.30
  -8  -4  13    3.23    2.35
   8   4 -12  168.59   10.34
  -8  -4  12  161.52    9.86
   8   4 -11  349.69   15.07
  -8  -4  11  325.53   13.99
   8   4 -10   13.60    3.21
  -8  -4  10   16.65    3.53
   8   4  -9  909.52   24.18
  -8  -4   9  882.36   23.26
   8   4  -8    0.21    2.67
  -8  -4   8   -0.87    1.73
   8   4  -7   36.33    4.78
  -8  -4   7   38.10    4.97
  -8  -4   7   34.26    4.71
  -8  -4   6   13.24    2.84
   8   4  -6   15.60    3.68
  -8  -4   6   11.18    3.43
  -8  -4   5   66.71    6.49
  -8  -4   5   69.95    6.94
   8   4  -5   60.76    6.54
  -8  -4   4  188.74   11.28
   8   4  -4  185.86   10.95
   8   4  -3   66.47    6.92
   8   4  -2 1165.62   27.00
   8   4  -2 1266.07   28.98
   8   4  -1  195.09   11.28
   8   4  -1  199.15   11.74
   8   4   0  158.12   10.24
   8   4   0  154.79   10.70
   8   4   1  231.65   12.35
   8   4   1  238.15   12.98
   8   4   2   70.05    6.83
   8   4   2   73.28    7.39
   8   4   3  328.09   13.93
   8   4   3  344.33   15.05
   8   4   4    3.18    1.34
   8   4   4    2.51    1.90
   8   4   5  519.99   14.85
   8   4   5  578.60   17.17
   8   4   6  458.99   11.64
   8   4   6  513.37   14.35
   8   4   7    6.57    1.78
  -8  -5  17    3.45    1.34
   8   5 -17   12.09    2.07
  -8  -5  16  153.67    7.28
   8   5 -15    3.84    2.10
  -8  -5  15    9.91    2.44
   8   5 -14  314.76   12.80
   8   5 -13  589.32   18.58
  -8  -5  13  564.89   16.34
   8   5 -12   42.01    5.53
  -8  -5  12   43.86    5.35
   8   5 -11   95.20    7.89
  -8  -5  11   84.92    7.02
   8   5 -10  116.41    8.93
  -8  -5  10  105.45    7.92
   8   5  -9  342.37   15.18
  -8  -5   9  362.46   14.59
   8   5  -8  265.23   13.44
  -8  -5   8  268.73   12.78
   8   5  -7   12.61    3.46
  -8  -5   7    9.67    3.21
   8   5  -6   73.06    7.23
  -8  -5   6   69.84    6.57
   8   5  -5   22.55    4.47
   8   5  -4  668.25   21.03
   8   5  -3  180.06   11.22
   8   5  -2  174.60   11.05
   8   5  -1   51.03    6.31
   8   5   0  624.33   19.33
   8   5   0  605.23   20.26
   8   5   1  339.77   14.01
   8   5   1  355.68   15.59
   8   5   2  388.46   14.29
   8   5   2  422.68   16.52
   8   5   3   68.45    6.70
   8   5   4  355.93   13.49
   8   5   5   37.78    4.16
   8   5   6  643.87   13.63
   8   6 -17  236.44    7.23
   8   6 -16    4.72    1.76
   8   6 -15  465.61   13.70
  -8  -6  15  487.45   12.44
   8   6 -14   15.90    3.29
   8   6 -13  447.94   15.86
   8   6 -12  139.99    9.40
   8   6 -11    4.21    2.72
   8   6 -10  111.07    8.85
   8   6  -9   21.19    4.18
  -8  -6   9   13.61    3.40
   8   6  -8   52.16    6.15
  -8  -6   8   52.87    5.54
   8   6  -7   14.64    3.48
  -8  -6   7   14.39    3.18
  -8  -6   6   22.22    4.18
   8   6  -5  160.88   10.39
   8   6  -4  406.38   16.40
   8   6  -3  270.06   13.40
   8   6  -2   95.69    8.17
   8   6  -1  250.02   12.85
   8   6   0   66.25    6.82
   8   6   1   33.55    4.87
   8   6   2  361.44   14.17
   8   6   3   59.66    5.58
   8   6   4  383.48   12.23
   8   6   5  455.72   11.18
   8   7 -16  114.12    5.75
   8   7 -15  398.31   11.85
   8   7 -14  544.51   15.44
   8   7 -13  142.45    8.68
   8   7 -12   26.11    4.22
   8   7 -11    8.99    3.00
   8   7 -10   79.05    7.41
   8   7  -9    6.62    2.80
   8   7  -8  238.18   12.78
   8   7  -7    1.68    1.97
   8   7  -6  184.92   11.31
  -8  -7   6  194.70   10.17
  -8  -7   5   78.35    6.70
   8   7  -4    6.10    2.63
   8   7  -3  115.09    8.56
   8   7  -2  222.90   11.69
   8   7  -1  107.42    8.01
   8   7   0  593.80   18.10
   8   7   1  402.02   14.17
   8   7   2   99.14    6.68
   8   7   3   94.84    5.84
   8   7   4  172.57    6.31
   8   8 -16  147.32    5.51
   8   8 -15    1.74    1.42
   8   8 -14  197.66    6.68
   8   8 -14  212.42    8.82
   8   8 -13   40.03    4.50
   8   8 -12    9.58    2.81
   8   8 -11   66.37    6.25
   8   8 -10    8.70    2.99
   8   8  -9   12.83    3.81
   8   8  -8  289.77   13.47
   8   8  -7  528.08   18.30
   8   8  -6   -0.51    2.24
   8   8  -5   40.54    5.50
   8   8  -4  116.30    8.91
   8   8  -3   54.25    5.60
  -8  -8   3   50.81    4.78
   8   8  -2  463.82   15.31
   8   8  -1  184.79    9.36
   8   8   0  333.48   11.81
   8   8   1  311.89   10.39
   8   8   2   27.36    2.82
   8   8   2   27.98    2.86
   8   9 -14    3.86    1.45
   8   9 -14    3.57    1.41
   8   9 -13   32.24    3.49
   8   9 -12   10.01    2.42
   8   9 -11   41.87    4.67
   8   9 -10    2.72    2.22
   8   9  -9  176.63    9.64
   8   9  -8  159.62    9.44
   8   9  -7  532.39   17.07
   8   9  -6   96.40    7.57
   8   9  -5   20.50    3.82
   8   9  -4   87.59    7.10
   8   9  -3  275.54   11.74
   8   9  -2   68.10    5.78
   8   9  -1  668.00   15.60
   8   9   0   30.29    3.06
   8  10 -13   81.61    4.25
   8  10 -12    8.65    1.85
   8  10 -11   36.38    3.59
   8  10 -10   27.85    3.46
   8  10  -9  137.14    7.49
   8  10  -8  439.61   13.47
   8  10  -7  105.23    6.78
   8  10  -6   17.27    3.03
   8  10  -5    5.11    1.99
   8  10  -4   93.31    5.91
   8  10  -3  413.60   10.89
  -9  13   1  184.67    8.98
  -9  13   0    1.77    1.89
  -9  13  -1  112.91    7.13
  -9  13  -2   15.44    2.88
  -9  13  -3   69.05    5.26
  -9  13  -4    3.93    1.28
  -9  12   8  131.99    5.17
  -9  12   7  252.62    8.73
  -9  12   6   44.75    4.34
  -9  12   5  240.93   10.44
  -9  12   4    7.37    2.50
  -9  12   3   99.88    6.95
  -9  12   3  104.47    7.01
  -9  12   2   70.43    5.41
  -9  12   2   75.32    6.22
  -9  12   1    5.77    2.59
  -9  12   0  120.26    8.30
  -9  12  -1  102.31    7.70
  -9  12  -2  162.29    7.19
  -9  12  -2  184.00   10.14
  -9  12  -3   87.10    5.17
  -9  12  -3   94.69    7.29
  -9  12  -4  153.90    8.64
  -9  12  -5    8.95    2.25
  -9  12  -6   80.04    4.76
  -9  11   9   40.92    3.47
  -9  11   8   50.24    4.51
  -9  11   7  269.21   11.39
  -9  11   6   63.95    6.18
  -9  11   5   91.55    7.79
  -9  11   4  104.48    8.77
  -9  11   4  117.66    7.80
  -9  11   3   43.42    5.48
  -9  11   3   47.37    5.26
  -9  11   2   26.00    4.08
  -9  11   2   25.89    4.11
  -9  11   1   14.85    3.70
  -9  11   0  272.62   13.11
  -9  11  -1   16.20    4.06
  -9  11  -2  266.31   13.21
  -9  11  -2  267.48   10.56
  -9  11  -3    2.20    2.04
  -9  11  -3    2.27    2.47
  -9  11  -4  418.21   15.90
  -9  11  -4  417.60   13.41
  -9  11  -5  366.60   13.99
  -9  11  -5  382.36   12.46
  -9  11  -6   11.27    2.57
  -9  11  -6   17.41    2.78
  -9  11  -7  127.11    6.14
  -9  10  10  114.83    5.83
  -9  10   9  493.25   13.95
  -9  10   8   42.92    4.90
  -9  10   7   67.39    6.70
  -9  10   6   90.01    8.21
  -9  10   5    4.95    2.94
  -9  10   5    1.19    1.41
  -9  10   4   68.75    7.54
  -9  10   4   64.99    6.16
  -9  10   3  117.77    9.86
  -9  10   3  125.09    8.62
  -9  10   2   25.14    4.87
  -9  10   2   29.38    4.61
  -9  10   1  132.48    9.18
  -9  10   1  123.28    9.04
  -9  10   0  331.33   14.98
  -9  10  -1   62.16    6.95
  -9  10  -1   48.18    4.85
  -9  10  -2  258.80   13.84
  -9  10  -2  244.58   11.43
  -9  10  -3  417.29   17.43
  -9  10  -3  402.00   14.94
  -9  10  -4    0.60    2.40
  -9  10  -4    2.00    2.70
  -9  10  -5  348.85   15.07
  -9  10  -5  358.24   13.52
  -9  10  -6   76.70    6.82
  -9  10  -6   71.81    5.88
  -9  10  -7   11.58    2.84
  -9  10  -8  359.19    9.89
  -9   9  12   -0.07    0.53
  -9   9  11  357.24   10.05
  -9   9  11  365.97   10.62
  -9   9  10  196.53    8.94
  -9   9  10  181.97    8.56
  -9   9   9  224.69   10.83
  -9   9   9  220.74   10.29
  -9   9   8  299.07   13.70
  -9   9   8  282.74   12.43
  -9   9   7    7.33    2.97
  -9   9   6   -1.05    2.40
  -9   9   6    0.24    1.36
  -9   9   5    8.51    3.98
  -9   9   5    5.36    2.21
  -9   9   4  138.20   11.33
  -9   9   4  154.66    9.49
  -9   9   3   11.13    3.74
  -9   9   3    4.89    2.58
  -9   9   2  169.49   12.18
  -9   9   2  166.20   10.43
  -9   9   1   84.10    8.25
  -9   9   1   87.63    7.61
  -9   9   0   10.97    2.68
  -9   9   0   10.16    3.56
  -9   9  -1  573.02   20.68
  -9   9  -1  576.10   18.49
  -9   9  -1  579.85   18.21
  -9   9  -2    3.81    2.42
  -9   9  -2    4.62    2.66
  -9   9  -2    4.48    3.31
  -9   9  -3  485.19   19.68
  -9   9  -3  452.08   16.78
  -9   9  -3  468.87   16.61
  -9   9  -4  540.49   20.49
  -9   9  -4  525.56   17.93
  -9   9  -4  522.77   17.18
  -9   9  -5   85.74    8.49
  -9   9  -5   74.64    6.90
  -9   9  -6  183.69   11.13
  -9   9  -6  202.88   10.32
  -9   9  -7   29.99    4.39
  -9   9  -7   32.03    4.17
  -9   9  -8  108.80    6.49
  -9   9  -9  514.26   10.41
  -9   8  13   65.84    4.06
  -9   8  12   87.58    4.80
  -9   8  12   88.76    5.64
  -9   8  11    4.78    1.61
  -9   8  11    4.74    2.21
  -9   8  10  570.40   16.77
  -9   8  10  525.13   16.42
  -9   8   9   13.79    3.59
  -9   8   8  248.52   13.31
  -9   8   7    3.75    2.53
  -9   8   7    2.90    2.23
  -9   8   6   31.01    5.57
  -9   8   6   33.79    4.67
  -9   8   6   37.08    4.76
  -9   8   5    3.21    2.17
  -9   8   5    4.36    2.54
  -9   8   5    3.02    1.97
  -9   8   4   25.56    6.13
  -9   8   4   37.77    4.84
  -9   8   4   35.77    4.82
  -9   8   3  765.20   27.24
  -9   8   3  842.76   22.38
  -9   8   3  810.99   21.86
  -9   8   2   59.77    7.56
  -9   8   2   51.51    5.85
  -9   8   2   57.06    6.31
  -9   8   1  380.04   17.57
  -9   8   1  395.18   16.20
  -9   8   1  345.77   14.64
  -9   8   0    2.26    2.26
  -9   8   0   -0.44    1.32
  -9   8   0    0.34    2.78
  -9   8  -1   76.59    8.04
  -9   8  -1   56.98    5.96
  -9   8  -1   65.58    6.68
  -9   8  -2  507.76   20.19
  -9   8  -2  473.13   17.76
  -9   8  -3   37.75    6.25
  -9   8  -3   38.05    5.81
  -9   8  -4  849.00   21.29
  -9   8  -4  852.93   26.55
  -9   8  -4  851.55   23.70
  -9   8  -5  229.66   11.06
  -9   8  -5  244.17   13.99
  -9   8  -5  252.46   12.77
  -9   8  -6  115.50    7.53
  -9   8  -6  126.67    9.77
  -9   8  -6  128.03    8.79
  -9   8  -7  269.13   10.70
  -9   8  -7  307.32   13.64
  -9   8  -8   15.68    2.33
  -9   8  -8   14.32    2.92
  -9   8  -9  237.45    8.34
  -9   7  14   90.42    4.74
  -9   7  13  142.56    5.43
  -9   7  13  152.42    7.39
  -9   7  12  426.08   12.17
  -9   7  12  433.65   13.85
  -9   7  11   89.76    6.47
  -9   7  10   44.17    5.47
  -9   7   9    7.84    3.17
  -9   7   8   71.18    7.73
  -9   7   7   12.68    2.70
  -9   7   7   18.36    4.53
  -9   7   6   12.09    2.96
  -9   7   6    8.53    2.95
  -9   7   5   12.70    3.03
  -9   7   5   14.94    3.04
  -9   7   4   -2.17    2.44
  -9   7   4   -0.08    1.39
  -9   7   3 1315.61   27.33
  -9   7   3 1199.69   27.07
  -9   7   2  386.53   15.41
  -9   7   2  353.26   14.86
  -9   7   1  229.53   12.32
  -9   7   1  240.31   11.78
  -9   7   1  215.90   11.83
  -9   7   0  472.75   17.48
  -9   7   0  494.67   18.63
  -9   7   0  492.00   17.50
  -9   7  -1    4.45    2.60
  -9   7  -1    7.22    3.12
  -9   7  -2  293.88   15.43
  -9   7  -2  283.36   14.18
  -9   7  -3 1338.25   33.33
  -9   7  -3 1252.70   29.73
  -9   7  -4    2.88    2.82
  -9   7  -4    4.67    3.73
  -9   7  -5  732.19   19.90
  -9   7  -5  755.45   24.88
  -9   7  -5  754.05   22.34
  -9   7  -6   36.88    4.49
  -9   7  -6   45.07    6.27
  -9   7  -6   43.09    5.73
  -9   7  -7  901.32   20.04
  -9   7  -7 1023.07   25.43
  -9   7  -8  105.05    6.17
  -9   7  -8  116.82    7.73
  -9   7  -9    2.62    0.95
  -9   7  -9   -1.12    1.19
  -9   6  15   32.51    2.79
  -9   6  14  639.51   14.60
  -9   6  13   17.72    2.40
  -9   6  13   15.60    3.08
  -9   6  12  115.90    6.95
  -9   6  11   40.12    5.01
  -9   6  11   27.55    4.12
  -9   6  10   37.70    5.37
  -9   6  10   42.95    5.45
  -9   6   9   22.72    4.70
  -9   6   8   82.90    7.37
  -9   6   7  283.73   13.33
  -9   6   6   15.04    3.45
  -9   6   5  250.26   12.55
  -9   6   4  727.33   19.35
  -9   6   4  733.70   21.23
  -9   6   3  101.91    7.69
  -9   6   3   91.47    7.88
  -9   6   2  552.17   18.11
  -9   6   2  538.52   18.36
  -9   6   1    5.45    2.88
  -9   6   1    5.80    2.47
  -9   6   0  447.49   17.39
  -9   6   0  436.30   16.89
  -9   6  -1  511.39   19.36
  -9   6  -1  510.87   18.80
  -9   6  -2  143.05   10.24
  -9   6  -3  414.38   17.44
  -9   6  -4  224.21   12.87
  -9   6  -5  705.15   22.06
  -9   6  -6  710.45   19.13
  -9   6  -7  135.82    7.93
  -9   6  -8   15.31    2.49
  -9   6  -9    6.19    1.26
  -9   6  -9    5.39    2.06
  -9   6 -10    2.76    1.06
  -9   5  16  177.38    5.51
  -9   5  15  128.65    6.23
  -9   5  14  421.13   13.07
  -9   5  13  333.71   10.81
  -9   5  13  321.46   12.35
  -9   5  12    1.24    1.79
  -9   5  12    1.24    1.84
  -9   5  11   15.26    3.51
  -9   5  11   14.38    3.21
  -9   5  10   12.23    3.34
  -9   5   9  254.53   12.79
  -9   5   9  268.91   13.28
  -9   5   8    3.25    1.78
  -9   5   8   -0.27    1.55
  -9   5   7  131.59    9.23
  -9   5   6  249.41   13.12
  -9   5   6  234.35   12.19
  -9   5   5   50.16    6.08
  -9   5   5   56.55    6.14
  -9   5   4  806.80   22.60
  -9   5   4  828.00   22.69
  -9   5   3  843.45   22.84
  -9   5   3  869.55   21.12
  -9   5   3  863.86   23.04
  -9   5   2    7.27    2.95
  -9   5   2    4.31    2.20
  -9   5   2    8.02    2.85
  -9   5   2    3.62    2.31
  -9   5   1  212.20   12.78
  -9   5   1  216.65   11.52
  -9   5   0  103.76    9.08
  -9   5   0  109.09    8.37
  -9   5  -1 2247.97   39.71
   9  -5   2  689.83   20.38
  -9   5  -2  666.53   22.12
   9  -5   3   55.61    5.95
  -9   5  -3   63.68    7.22
   9  -5   4  151.06    9.95
  -9   5  -4  132.53   10.00
   9  -5   5   28.77    4.59
   9  -5   6  632.55   18.80
   9  -5   7   67.62    6.00
  -9   5  -7   63.30    5.41
   9  -5   8   42.22    4.16
  -9   5  -8   45.43    4.05
  -9   5  -9    3.17    0.87
   9  -5   9    1.69    0.99
  -9   5 -10   12.01    1.87
  -9   4  16    4.14    1.39
  -9   4  15  177.48    7.95
  -9   4  14   10.92    2.27
  -9   4  14   14.04    2.99
  -9   4  14   12.29    2.91
  -9   4  13   76.71    6.04
  -9   4  13   70.34    6.35
  -9   4  12   39.40    4.63
  -9   4  12   45.22    5.55
  -9   4  11   40.65    5.36
  -9   4  10  127.00    9.15
  -9   4   9  327.43   14.69
  -9   4   9  307.89   14.19
  -9   4   8   77.41    7.29
  -9   4   8   80.00    7.24
  -9   4   7    8.82    2.78
  -9   4   7   11.48    3.20
  -9   4   7   12.90    3.01
  -9   4   6  247.33   12.51
  -9   4   6  247.34   12.48
  -9   4   6  260.79   12.85
  -9   4   5  473.85   16.90
  -9   4   5  507.30   17.58
  -9   4   4   52.99    5.92
  -9   4   4   51.23    5.93
  -9   4   4   50.51    5.77
  -9   4   3  693.61   20.04
  -9   4   3  731.48   22.34
  -9   4   3  739.24   21.18
  -9   4   2   14.42    3.64
  -9   4   2   10.26    3.01
   9  -4  -1 2609.16   38.68
  -9   4   1 2605.52   42.62
  -9   4   0 2555.65   42.73
   9  -4   0 2504.73   38.61
   9  -4   1  127.01    9.13
   9  -4   2  375.82   15.62
   9  -4   3   44.32    5.78
   9  -4   4  593.63   19.81
   9  -4   5  179.25   10.93
   9  -4   6    6.63    2.88
   9  -4   7   11.27    3.21
   9  -4   8    5.92    2.20
   9  -4   9   31.03    3.24
  -9   4 -10   59.72    3.65
  -9   3  16    5.31    1.27
  -9   3  16    7.80    1.70
  -9   3  15   32.60    3.43
  -9   3  15   30.18    3.79
  -9   3  15   36.32    4.29
  -9   3  14   98.51    6.80
  -9   3  14   97.47    7.23
  -9   3  13  184.64   10.47
  -9   3  12  144.13    9.68
  -9   3  11   57.95    6.62
  -9   3  10  239.60   12.72
  -9   3  10  240.21   12.64
  -9   3   9    1.55    2.10
  -9   3   9    5.54    1.86
  -9   3   8  488.02   17.67
  -9   3   8  512.58   18.30
  -9   3   8  504.33   17.89
  -9   3   7  349.41   14.52
  -9   3   7  353.64   14.99
  -9   3   7  333.83   14.30
  -9   3   6  135.77    9.05
  -9   3   6  132.63    9.04
  -9   3   6  151.79    9.77
  -9   3   5  975.92   23.30
  -9   3   5  930.04   23.27
  -9   3   4  219.38   11.00
  -9   3   4  208.13   11.00
  -9   3   4  234.94   11.94
  -9   3   3  393.24   15.38
  -9   3   3  360.27   14.03
  -9   3   3  373.05   15.64
   9  -3  -2 1110.17   25.33
  -9   3   2 1069.01   26.78
   9  -3  -1   92.16    7.76
  -9   3   1   97.12    8.33
   9  -3   0 1961.56   34.71
  -9   3   0 1954.54   36.53
   9  -3   1   28.92    4.79
   9  -3   2  352.65   15.33
   9  -3   3   64.26    6.95
   9  -3   4  320.48   15.00
   9  -3   5   72.26    7.42
   9  -3   6  186.15   10.91
   9  -3   7   97.48    7.49
   9  -3   8    5.86    2.28
   9  -3   9    3.67    1.60
  -9   2  17   51.26    3.21
  -9   2  16    2.12    1.38
  -9   2  16    3.48    1.40
  -9   2  15    5.85    2.15
  -9   2  15   15.11    2.80
  -9   2  15   12.52    2.94
  -9   2  14   28.79    4.49
  -9   2  13  225.63   11.86
  -9   2  12  171.94   10.73
  -9   2  11   -2.50    2.07
  -9   2  10   20.92    4.32
  -9   2  10   14.37    3.39
  -9   2   9  734.18   21.85
  -9   2   9  724.89   21.62
  -9   2   8   57.90    5.94
  -9   2   8   58.47    6.67
  -9   2   8   66.00    6.72
  -9   2   8   57.40    6.17
  -9   2   7 1625.67   29.86
  -9   2   7 1606.43   31.98
  -9   2   7 1708.86   32.32
  -9   2   7 1660.50   31.78
  -9   2   6  728.49   19.51
  -9   2   6  701.21   20.53
  -9   2   6  723.77   20.84
  -9   2   5  353.27   13.47
  -9   2   5  370.38   14.68
  -9   2   5  389.05   15.11
  -9   2   4  541.69   16.36
  -9   2   4  550.59   17.81
   9  -2  -3   27.77    4.37
  -9   2   3   39.12    4.69
   9  -2  -2 1106.61   25.73
  -9   2   2 1027.25   25.71
   9  -2  -1  791.93   22.11
  -9   2   1  774.07   22.52
   9  -2   0  320.84   14.31
  -9   2   0  315.99   14.69
   9  -2   1   90.46    7.97
   9  -2   2   51.45    6.10
   9  -2   3  488.96   18.82
   9  -2   4   78.52    7.62
   9  -2   5  118.52    9.22
   9  -2   6    4.94    3.02
   9  -2   7  109.51    7.84
   9  -2   8    7.03    2.19
   9  -2   9  125.05    6.08
  -9   1  17   18.11    2.37
  -9   1  16    1.29    1.76
  -9   1  16    3.77    1.17
  -9   1  16   -1.00    1.80
  -9   1  15    1.89    1.93
  -9   1  15    1.40    1.72
  -9   1  14  188.25   10.54
  -9   1  13   85.07    7.71
  -9   1  12  267.46   13.47
  -9   1  11   14.17    3.23
  -9   1  10   10.37    3.32
  -9   1  10    5.93    2.72
  -9   1   9  505.83   18.40
  -9   1   9  517.28   18.05
  -9   1   9  494.54   18.01
  -9   1   8 1778.41   32.74
  -9   1   8 1791.84   33.57
  -9   1   7   87.69    7.62
  -9   1   7   84.22    7.09
  -9   1   7   83.17    7.26
  -9   1   6 1014.09   25.10
  -9   1   6 1007.61   24.24
  -9   1   6 1014.41   24.64
  -9   1   5    9.43    3.75
  -9   1   5    0.69    1.65
  -9   1   4 1483.00   29.46
  -9   1   4 1563.30   29.68
  -9   1   3  495.45   16.79
   9  -1  -3  508.87   17.68
   9  -1  -2  124.81    9.01
   9  -1  -1 1131.24   26.80
  -9   1   1 1124.22   27.13
  -9   1   0   15.74    4.02
   9  -1   0   12.99    3.72
   9  -1   1  567.06   19.66
   9  -1   2   10.12    3.45
   9  -1   3   25.74    4.76
   9  -1   4   11.08    3.90
   9  -1   5   74.61    7.43
   9  -1   6  132.58    9.27
   9  -1   7    8.67    2.94
   9  -1   8   47.75    4.51
   9  -1   9   19.52    2.44
  -9   0  18   18.71    1.91
  -9   0  17    2.90    1.53
  -9   0  16   88.18    6.36
  -9   0  16   94.28    6.35
  -9   0  15  191.72    9.95
  -9   0  14  237.40   11.89
  -9   0  13  848.23   23.32
  -9   0  12   -1.82    2.09
  -9   0  11   95.50    8.43
  -9   0  10  116.95    8.60
  -9   0  10   91.54    8.13
  -9   0   9   55.23    6.03
  -9   0   9   55.44    6.36
  -9   0   8  729.64   22.05
  -9   0   8  732.01   20.68
  -9   0   8  733.84   21.75
  -9   0   7 1324.06   29.22
  -9   0   7 1355.89   27.81
  -9   0   7 1386.50   29.47
  -9   0   6 1434.18   29.95
  -9   0   6 1480.83   29.99
  -9   0   5 1628.58   31.28
  -9   0   5 1612.37   29.85
   9   0  -4  901.64   22.37
  -9   0   4  867.26   22.00
   9   0  -3 1451.07   28.40
  -9   0   3 1407.86   28.06
   9   0  -2   10.34    3.09
   9   0  -2   -3.53    2.03
   9   0  -1   79.54    7.38
  -9   0   1   82.56    7.38
   9   0  -1   76.54    7.03
   9   0   0   26.43    4.48
   9   0   0   27.03    4.25
   9   0   1   69.74    7.40
   9   0   1   67.70    6.71
   9   0   2   40.51    5.71
   9   0   2   31.41    4.94
   9   0   3  205.59   12.28
   9   0   3  216.90   11.56
   9   0   4  116.34    9.10
   9   0   4   95.89    7.61
   9   0   5    2.58    2.44
   9   0   5   -1.08    1.84
   9   0   6   40.22    5.15
   9   0   6   37.47    4.13
   9   0   7    8.20    2.57
   9   0   7    9.26    1.73
   9   0   8   61.94    4.65
  -9  -1  18  144.74    5.39
  -9  -1  17    0.09    1.23
  -9  -1  16  192.32    9.19
  -9  -1  16  193.37    8.89
  -9  -1  15   91.54    7.03
  -9  -1  14   51.55    5.75
  -9  -1  13   73.19    7.06
  -9  -1  12  402.94   16.38
  -9  -1  11    3.51    2.73
  -9  -1  10 1959.34   36.11
  -9  -1   9  366.90   14.69
  -9  -1   9  388.79   16.00
  -9  -1   8  451.04   17.54
  -9  -1   8  435.29   15.70
  -9  -1   8  465.07   17.55
  -9  -1   7  771.78   22.62
  -9  -1   7  718.32   19.80
  -9  -1   7  762.75   22.14
  -9  -1   6   78.29    7.35
  -9  -1   6   75.26    6.84
  -9  -1   6   72.12    6.88
  -9  -1   5 1772.96   33.29
  -9  -1   5 1579.42   30.14
   9   1  -5 1767.63   32.26
  -9  -1   5 1611.58   29.31
  -9  -1   4   25.95    4.24
   9   1  -4   17.31    4.04
   9   1  -3  426.68   16.55
  -9  -1   3  392.48   15.11
   9   1  -3  429.24   16.06
  -9  -1   2    5.15    2.06
   9   1  -2    6.58    2.61
   9   1  -2    2.01    1.83
   9   1  -1   80.55    7.40
   9   1  -1   79.86    7.32
   9   1   0   99.98    8.45
   9   1   0   98.63    8.19
   9   1   1  254.40   13.47
   9   1   1  253.26   12.86
   9   1   2   39.54    5.69
   9   1   2   42.59    5.39
   9   1   3  203.85   11.95
   9   1   3  197.66   11.16
   9   1   4    6.13    2.83
   9   1   4    6.92    2.87
   9   1   5   16.96    3.55
   9   1   5   17.84    3.05
   9   1   6  108.17    7.43
   9   1   6   97.18    6.35
   9   1   7  266.58    9.99
   9   1   7  248.99    8.37
   9   1   8   91.72    4.67
  -9  -2  18  108.83    4.57
  -9  -2  17  107.93    5.96
  -9  -2  16    1.54    1.91
  -9  -2  16    2.22    1.14
  -9  -2  15    6.59    2.51
  -9  -2  14  223.52   11.19
  -9  -2  13  369.31   15.02
  -9  -2  12  588.27   19.42
  -9  -2  11  594.11   19.75
  -9  -2  10  890.71   24.15
   9   2  -9 1120.15   25.06
  -9  -2   9 1122.73   27.06
   9   2  -8    8.34    2.72
  -9  -2   8   13.65    3.44
   9   2  -7  552.93   17.70
  -9  -2   7  567.41   19.25
  -9  -2   6   83.17    7.54
  -9  -2   6   73.20    7.36
  -9  -2   5    2.07    2.24
   9   2  -5    7.19    3.21
  -9  -2   4  981.84   24.83
   9   2  -4 1037.88   25.53
   9   2  -3   78.13    7.26
  -9  -2   3   60.81    6.46
   9   2  -3   67.65    6.73
   9   2  -2  109.00    8.75
   9   2  -2  110.90    8.64
   9   2  -1   18.26    4.06
   9   2  -1   27.35    4.41
   9   2   0   14.62    3.56
   9   2   0   12.02    3.56
   9   2   1   15.75    3.53
   9   2   1   15.61    3.74
   9   2   2  156.47   10.51
   9   2   2  147.55   10.00
   9   2   3  152.78    9.97
   9   2   3  149.75    9.63
   9   2   4   31.68    4.75
   9   2   4   27.73    4.12
   9   2   5    8.07    2.60
   9   2   5    9.74    2.87
   9   2   6   51.12    4.63
   9   2   6   51.86    4.49
   9   2   7  110.54    5.36
   9   2   7  108.31    5.09
  -9  -3  17  287.76    9.06
  -9  -3  16  257.97   10.12
  -9  -3  16  251.84    9.08
  -9  -3  15  156.92    8.26
  -9  -3  14    6.93    2.38
   9   3 -13  378.46   13.48
  -9  -3  13  381.41   14.69
   9   3 -12   25.10    4.19
  -9  -3  12   25.28    4.40
   9   3 -11 2369.93   36.78
  -9  -3  11 2410.65   38.70
   9   3 -10  305.64   13.55
  -9  -3  10  297.35   13.75
   9   3  -9  820.83   22.21
  -9  -3   9  827.64   23.07
   9   3  -8  311.74   13.80
  -9  -3   8  325.46   14.56
   9   3  -7  335.30   14.36
  -9  -3   7  332.58   14.72
  -9  -3   6  899.00   24.08
   9   3  -5   19.85    3.96
   9   3  -4   17.40    3.86
   9   3  -3  232.58   12.46
   9   3  -2   28.03    4.43
   9   3  -2   41.63    5.43
   9   3  -1   -0.07    1.31
   9   3  -1    5.69    2.84
   9   3   0    8.76    3.18
   9   3   0   10.55    3.54
   9   3   1  371.69   15.60
   9   3   1  390.17   16.00
   9   3   2    3.56    2.67
   9   3   2   -1.15    2.18
   9   3   3   60.30    6.10
   9   3   3   48.01    5.49
   9   3   4   43.33    4.87
   9   3   4   46.00    5.05
   9   3   5  134.80    7.29
   9   3   5  131.37    7.35
   9   3   6  248.57    7.88
   9   3   6  278.09    8.96
  -9  -4  17   19.80    2.29
  -9  -4  16   40.08    3.82
  -9  -4  15  114.11    6.32
   9   4 -14   -0.78    1.41
  -9  -4  14    3.19    1.77
   9   4 -13 1158.78   24.00
  -9  -4  13 1139.38   23.87
   9   4 -12  318.43   13.40
  -9  -4  12  301.18   12.99
   9   4 -11  415.73   15.70
  -9  -4  11  386.95   15.08
   9   4 -10 1166.19   26.79
  -9  -4  10 1178.54   26.63
   9   4  -9  238.82   12.44
  -9  -4   9  236.78   12.19
   9   4  -8  278.41   13.43
  -9  -4   8  286.02   13.43
   9   4  -7    1.68    2.05
  -9  -4   7    7.10    2.93
  -9  -4   6   33.61    4.88
   9   4  -5  162.85   10.76
   9   4  -4    3.13    2.50
   9   4  -3   38.41    5.62
   9   4  -2   22.45    4.31
   9   4  -1   27.90    4.65
   9   4   0    6.48    2.62
   9   4   0    2.23    2.50
   9   4   1   86.27    7.31
   9   4   1   83.50    7.54
   9   4   2  197.69   10.20
   9   4   2  215.97   11.32
   9   4   3    4.72    2.18
   9   4   3    6.62    2.78
   9   4   4  356.78   10.93
   9   4   4  378.37   12.62
   9   4   5   67.60    4.77
  -9  -5  16   27.08    2.91
   9   5 -15  346.46   10.62
  -9  -5  15  355.36   11.02
   9   5 -14  232.27    9.92
  -9  -5  14  219.98    8.68
   9   5 -13  410.71   14.34
  -9  -5  13  412.43   13.19
   9   5 -12  859.93   21.74
  -9  -5  12  802.89   19.51
   9   5 -11  134.73    9.06
  -9  -5  11  136.06    8.56
   9   5 -10  349.56   14.70
  -9  -5  10  336.23   13.58
   9   5  -9    7.98    2.96
  -9  -5   9    5.70    2.86
   9   5  -8  411.64   16.31
  -9  -5   8  402.70   15.47
   9   5  -7  155.32   10.14
  -9  -5   7  158.24    9.92
  -9  -5   6  173.19   10.45
   9   5  -5   16.86    3.84
   9   5  -4   80.92    7.27
   9   5  -3    7.02    2.51
   9   5  -2    2.71    2.28
   9   5  -1   14.83    3.65
   9   5   0   27.65    4.82
   9   5   1   38.73    4.85
   9   5   2  404.12   14.14
   9   5   3  440.39   13.48
   9   5   4   79.42    5.15
   9   5   5  249.80    7.00
   9   6 -16  649.86   12.78
   9   6 -15  195.86    7.64
   9   6 -14 1002.09   19.50
   9   6 -13   26.44    3.88
   9   6 -12  142.80    8.73
   9   6 -11  111.56    8.06
  -9  -6  11  115.39    7.10
   9   6 -10  145.60    9.52
  -9  -6  10  131.90    7.99
   9   6  -9  307.60   13.76
  -9  -6   9  310.04   12.44
   9   6  -8   43.17    5.52
  -9  -6   8   43.15    4.90
   9   6  -7    3.50    2.59
  -9  -6   7    6.23    2.49
   9   6  -6   74.58    7.15
  -9  -6   6   78.25    6.72
  -9  -6   5    5.29    2.08
   9   6  -4    3.17    2.50
   9   6  -3  149.49    9.51
   9   6  -2  134.82    9.00
   9   6  -1   13.52    3.31
   9   6   0   30.47    4.35
   9   6   1  600.04   16.44
   9   6   2    5.12    2.21
   9   6   3  327.29    9.77
   9   7 -16  709.70   11.50
   9   7 -14  552.83   13.44
   9   7 -13  107.53    6.63
   9   7 -12    2.21    2.21
   9   7 -11   10.64    2.77
   9   7 -10   78.57    6.79
   9   7  -9   42.62    5.32
   9   7  -8  427.44   15.69
  -9  -7   8  412.22   13.25
   9   7  -7   17.13    3.90
  -9  -7   7   16.27    3.04
   9   7  -6   14.40    3.55
  -9  -7   6   17.01    3.00
   9   7  -5   64.19    6.57
  -9  -7   5   72.43    5.92
  -9  -7   4   29.74    3.78
   9   7  -3  171.05    9.65
  -9  -7   3  179.58    9.06
   9   7  -2  292.05   12.02
   9   7  -1   46.11    4.85
   9   7   0   15.13    2.85
   9   7   1  392.51   11.29
   9   7   2   55.45    3.65
   9   8 -14   -0.15    0.77
   9   8 -13  120.11    6.26
   9   8 -12   24.63    3.42
   9   8 -11   -1.07    1.48
   9   8 -10   52.93    5.13
   9   8  -9  189.17    9.72
   9   8  -8   48.44    5.26
   9   8  -7  103.17    7.43
   9   8  -6   36.77    4.66
   9   8  -5  113.57    7.86
   9   8  -4    1.96    2.02
   9   8  -3  303.93   11.90
  -9  -8   3  297.55    9.48
   9   8  -2    9.88    2.51
  -9  -8   2   11.56    1.78
   9   8  -1  458.84   12.63
   9   8   0  147.00    6.22
   9   9 -13   42.05    3.09
   9   9 -12   53.52    3.93
   9   9 -11    2.34    1.58
   9   9 -10    5.22    2.02
   9   9  -9   95.70    6.16
   9   9  -8  115.09    6.90
   9   9  -7    2.40    1.85
   9   9  -6   38.79    4.15
   9   9  -5   31.88    3.78
   9   9  -4    9.15    2.30
   9   9  -3  320.94    9.81
   9  10  -9   42.40    3.20
   9  10  -8   11.15    1.92
   9  10  -7  122.47    5.44
 -10  13   0   17.80    2.53
 -10  13  -1  151.19    6.62
 -10  12   6  502.17   11.40
 -10  12   5  132.84    6.38
 -10  12   4   53.89    4.28
 -10  12   3  138.28    6.24
 -10  12   2  279.44   10.50
 -10  12   1   14.00    2.85
 -10  12   0   48.93    4.67
 -10  12  -1   59.77    5.26
 -10  12  -2   21.84    3.32
 -10  12  -3   93.28    5.88
 -10  12  -4   57.23    4.11
 -10  11   9  504.44    9.81
 -10  11   8  331.67    9.86
 -10  11   7   14.84    2.70
 -10  11   6  220.98   10.11
 -10  11   5    3.36    1.83
 -10  11   4  664.86   18.48
 -10  11   4  703.40   16.85
 -10  11   3   92.80    6.81
 -10  11   3   87.50    6.34
 -10  11   2    1.52    1.65
 -10  11   1   18.25    3.36
 -10  11   0   11.69    2.98
 -10  11  -1   22.95    3.87
 -10  11  -2   52.27    5.55
 -10  11  -3   72.65    5.95
 -10  11  -4    1.43    1.49
 -10  11  -5    1.31    1.25
 -10  10  10  329.62    8.71
 -10  10   9  209.82    8.46
 -10  10   8  727.19   17.77
 -10  10   7   10.81    2.85
 -10  10   6   61.28    6.39
 -10  10   5  113.73    8.94
 -10  10   5  101.80    6.71
 -10  10   4    6.71    2.95
 -10  10   4   13.95    2.91
 -10  10   3  371.93   15.49
 -10  10   3  377.18   13.65
 -10  10   2   75.59    6.78
 -10  10   2   80.19    6.66
 -10  10   1   24.65    4.01
 -10  10   0   23.87    4.10
 -10  10  -1   52.31    5.78
 -10  10  -2   -0.12    1.60
 -10  10  -3  145.05    9.33
 -10  10  -4  190.16    9.95
 -10  10  -5   38.81    4.28
 -10  10  -6    6.50    1.78
 -10   9  11   38.42    3.15
 -10   9  11   37.62    3.04
 -10   9  10 1087.24   19.35
 -10   9  10 1060.28   18.10
 -10   9   9  174.48    9.02
 -10   9   9  163.27    7.94
 -10   9   8  171.43    9.98
 -10   9   8  161.45    8.59
 -10   9   7   14.62    4.13
 -10   9   6   59.46    7.13
 -10   9   6   64.98    5.49
 -10   9   5   75.43    8.24
 -10   9   5   75.89    6.10
 -10   9   5   69.31    5.76
 -10   9   4  180.61   12.37
 -10   9   4  164.99    9.24
 -10   9   4  168.33    9.20
 -10   9   3  103.61    9.41
 -10   9   3   86.73    6.96
 -10   9   3   89.26    6.79
 -10   9   2  126.65    9.70
 -10   9   2  116.26    8.18
 -10   9   2  122.51    8.12
 -10   9   1   17.26    3.54
 -10   9   1   25.13    4.15
 -10   9   0    0.37    1.57
 -10   9   0    0.69    1.83
 -10   9  -1    0.98    0.96
 -10   9  -1    2.15    2.50
 -10   9  -2  302.50   14.23
 -10   9  -2  306.84   12.68
 -10   9  -3  136.90    9.71
 -10   9  -3  134.25    8.31
 -10   9  -4  165.48   10.31
 -10   9  -4  164.43    8.71
 -10   9  -5  219.86   10.93
 -10   9  -5  201.11    8.80
 -10   9  -6   -1.07    1.27
 -10   9  -6    1.13    1.51
 -10   9  -7  259.20    8.81
 -10   8  12  951.51   14.43
 -10   8  12  993.11   16.44
 -10   8  11  571.31   13.89
 -10   8  11  586.08   14.58
 -10   8  10  107.21    7.11
 -10   8  10  108.62    6.94
 -10   8   9  363.11   14.23
 -10   8   8   44.92    5.87
 -10   8   7  216.65   12.88
 -10   8   6   48.11    6.78
 -10   8   6   35.28    4.29
 -10   8   6   43.87    5.07
 -10   8   5   97.46    9.57
 -10   8   5   79.58    6.35
 -10   8   5   79.39    6.76
 -10   8   4    4.56    2.27
 -10   8   4    6.52    3.05
 -10   8   4    2.31    2.01
 -10   8   3  169.06   12.33
 -10   8   3  176.55    9.90
 -10   8   3  171.24   10.01
 -10   8   2    6.48    2.38
 -10   8   2    8.72    2.86
 -10   8   2   11.65    3.09
 -10   8   1   11.59    3.12
 -10   8   1   15.70    3.34
 -10   8   0    3.37    2.53
 -10   8   0   -0.63    2.21
 -10   8  -1   38.60    5.48
 -10   8  -1   43.64    5.26
 -10   8  -2   38.46    6.06
 -10   8  -2   43.86    5.36
 -10   8  -3  940.96   23.36
 -10   8  -3 1026.74   26.42
 -10   8  -4   32.78    5.46
 -10   8  -5  231.70   11.88
 -10   8  -6   32.33    4.24
 -10   8  -7  258.00    9.71
 -10   8  -7  231.25    8.32
 -10   8  -8  297.53    8.18
 -10   7  14  171.46    5.64
 -10   7  13   95.52    4.08
 -10   7  13  118.62    5.94
 -10   7  12  148.62    6.76
 -10   7  12  154.89    7.77
 -10   7  11  762.72   17.88
 -10   7  10   63.64    5.95
 -10   7   9   88.40    7.62
 -10   7   8  132.53    9.91
 -10   7   7   92.10    8.80
 -10   7   7   82.79    6.90
 -10   7   6   46.69    5.33
 -10   7   5   64.23    5.84
 -10   7   5   63.25    6.44
 -10   7   4   70.96    6.07
 -10   7   4   68.42    6.47
 -10   7   3   20.08    4.05
 -10   7   3   19.74    3.59
 -10   7   2   21.66    3.89
 -10   7   2   20.43    3.79
 -10   7   1  153.11    9.96
 -10   7   1  145.35    9.58
 -10   7   0    6.87    2.89
 -10   7   0    2.63    2.49
 -10   7  -1   82.92    7.45
 -10   7  -1   82.71    7.90
 -10   7  -2  142.17   10.20
 -10   7  -3  352.92   16.04
 -10   7  -4  646.26   21.04
 -10   7  -5  134.83    9.43
 -10   7  -6  638.26   18.23
 -10   7  -7   19.25    3.29
 -10   7  -8  126.17    5.87
 -10   6  14  171.61    6.94
 -10   6  13  501.23   11.20
 -10   6  13  503.95   13.66
 -10   6  12  171.01    8.06
 -10   6  11    4.70    2.07
 -10   6  11    3.09    1.61
 -10   6  10   14.90    3.37
 -10   6  10    7.34    2.57
 -10   6   9    7.55    3.01
 -10   6   8  131.04    9.02
 -10   6   7  172.58   10.35
 -10   6   6   15.47    3.70
 -10   6   5    3.96    2.69
 -10   6   4   22.54    4.07
 -10   6   3   24.59    4.44
 -10   6   3   25.28    4.10
 -10   6   2    2.06    2.31
 -10   6   2    0.80    1.98
 -10   6   1  328.19   14.25
 -10   6   1  306.60   14.26
 -10   6   0  192.58   11.24
 -10   6  -1  457.84   17.81
 -10   6  -2 1385.50   31.41
 -10   6  -3   95.98    8.73
 -10   6  -4  658.88   21.31
 -10   6  -5   19.21    4.01
 -10   6  -6  638.31   18.54
 -10   6  -7  249.41   10.34
 -10   6  -8   47.09    3.85
 -10   5  15  659.22   12.50
 -10   5  14   13.47    2.51
 -10   5  13  140.62    6.77
 -10   5  13  130.27    7.22
 -10   5  12  148.06    8.00
 -10   5  12  149.61    8.43
 -10   5  11   31.76    4.65
 -10   5  11   18.62    3.09
 -10   5  10   12.64    2.85
 -10   5   9  136.50    9.32
 -10   5   9  141.94    9.48
 -10   5   8    4.76    2.46
 -10   5   8    3.25    1.92
 -10   5   7  287.52   13.62
 -10   5   6   83.37    7.35
 -10   5   5   61.76    6.48
 -10   5   4   97.52    8.06
 -10   5   3  163.51   10.37
 -10   5   2  183.92   10.14
 -10   5   2  179.60   10.96
 -10   5   1  356.68   14.60
 -10   5   0 1086.91   26.24
  10  -5   1   29.80    4.63
 -10   5  -1   30.85    4.80
  10  -5   2  526.59   17.69
  10  -5   3  345.55   14.14
  10  -5   4   29.97    4.61
  10  -5   5  260.22   11.26
  10  -5   6    3.28    1.25
  10  -5   7  168.92    7.13
 -10   5  -8  172.86    7.19
 -10   4  16  149.08    5.02
 -10   4  15   48.50    3.89
 -10   4  14  345.22   11.57
 -10   4  13   22.61    2.80
 -10   4  13   25.31    3.28
 -10   4  13   20.58    3.45
 -10   4  12   99.19    6.91
 -10   4  12   97.69    7.45
 -10   4  11   46.55    5.50
 -10   4  10    5.54    2.26
 -10   4   9   37.41    4.99
 -10   4   9   27.08    4.40
 -10   4   8  197.07   11.48
 -10   4   8  187.79   11.10
 -10   4   7   33.97    4.84
 -10   4   7   44.65    5.28
 -10   4   6    1.93    1.90
 -10   4   6    8.24    2.63
 -10   4   5    9.29    3.33
 -10   4   5    6.50    2.05
 -10   4   4  509.36   18.19
 -10   4   3   85.92    7.74
 -10   4   2 1077.43   26.65
  10  -4  -1  337.47   14.58
 -10   4   1  336.92   13.89
  10  -4   0  366.04   15.20
  10  -4   1   72.81    6.88
  10  -4   2   20.06    4.27
  10  -4   3  141.05    9.41
  10  -4   4   49.59    5.65
  10  -4   5  455.00   15.50
  10  -4   6 1014.48   21.18
  10  -4   7   57.85    4.67
  10  -4   8   40.37    3.04
 -10   3  16  101.87    4.68
 -10   3  15  139.85    6.34
 -10   3  15  151.70    7.10
 -10   3  15  160.42    7.63
 -10   3  14   68.06    5.22
 -10   3  14   69.17    5.79
 -10   3  13  632.77   15.63
 -10   3  13  635.94   18.20
 -10   3  12   -0.09    1.65
 -10   3  11   -1.69    2.09
 -10   3  10   21.09    4.07
 -10   3  10   23.40    4.19
 -10   3   9    2.42    2.21
 -10   3   9    4.84    1.99
 -10   3   8   26.64    4.47
 -10   3   8   30.27    4.46
 -10   3   7  150.22    9.98
 -10   3   7  143.00    9.71
 -10   3   6  371.05   15.37
 -10   3   6  379.50   15.72
 -10   3   5   96.99    7.97
 -10   3   5   85.78    7.75
 -10   3   4  377.07   15.31
 -10   3   4  374.20   15.59
 -10   3   3  354.12   14.79
 -10   3   3  334.65   14.81
 -10   3   2  635.40   19.80
  10  -3  -1 1451.83   30.51
  10  -3   0  106.48    8.54
  10  -3   1  755.83   22.46
  10  -3   2  143.40   10.03
  10  -3   3   81.20    7.31
  10  -3   4  366.16   14.98
  10  -3   5   30.63    4.22
  10  -3   6  258.19   10.98
  10  -3   7  197.13    8.44
  10  -3   8   56.33    3.71
 -10   2  16   26.48    2.66
 -10   2  16   32.15    2.70
 -10   2  15  275.69    9.99
 -10   2  15  295.27   10.89
 -10   2  14  418.00   14.26
 -10   2  13   12.64    3.24
 -10   2  12   11.85    3.22
 -10   2  11    8.49    2.77
 -10   2  10   37.58    5.21
 -10   2  10   34.18    4.95
 -10   2   9  150.82   10.15
 -10   2   9  155.57   10.11
 -10   2   8  175.16   10.75
 -10   2   8  170.14   10.64
 -10   2   7   29.12    4.74
 -10   2   7   21.37    3.96
 -10   2   6  527.57   18.39
 -10   2   6  465.96   17.29
 -10   2   5  133.54    9.29
 -10   2   5  139.53    9.52
 -10   2   4  135.30    9.35
 -10   2   4  143.08    9.65
 -10   2   3  475.21   17.32
 -10   2   3  513.78   18.09
  10  -2  -2   35.41    5.31
 -10   2   2   33.39    4.46
  10  -2  -1 1124.32   27.25
  10  -2   0  197.69   11.74
  10  -2   1  248.66   13.07
  10  -2   2  450.73   17.50
  10  -2   3   39.10    5.48
  10  -2   4  189.77   10.82
  10  -2   5  289.55   12.62
  10  -2   6    1.47    1.87
  10  -2   7   41.79    4.02
  10  -2   8    2.10    0.92
 -10   1  17   40.44    2.89
 -10   1  16   63.19    4.53
 -10   1  16   51.85    3.38
 -10   1  16   58.33    4.56
 -10   1  15    3.12    1.85
 -10   1  15    2.70    2.15
 -10   1  14  104.49    7.49
 -10   1  13   99.42    7.61
 -10   1  12   21.16    4.00
 -10   1  11  153.29   10.01
 -10   1  10   64.20    6.40
 -10   1  10   65.40    6.80
 -10   1   9    6.72    2.74
 -10   1   9    7.38    2.48
 -10   1   8  117.42    8.63
 -10   1   8  130.76    9.27
 -10   1   7  757.25   21.57
 -10   1   7  751.08   22.10
 -10   1   6  190.34   10.97
 -10   1   6  179.90   10.90
 -10   1   5  486.31   17.70
 -10   1   5  514.17   17.74
 -10   1   4    5.49    3.10
 -10   1   4    4.36    2.41
 -10   1   3  433.12   16.72
 -10   1   3  469.08   16.96
 -10   1   2  854.11   23.00
  10  -1  -2  886.60   24.42
  10  -1  -1    8.58    3.16
  10  -1   0  339.96   15.48
  10  -1   1   89.03    8.25
  10  -1   2  381.04   16.20
  10  -1   3  342.05   14.95
  10  -1   4    3.92    2.58
  10  -1   5  111.80    7.81
  10  -1   6  154.66    8.19
  10  -1   7   16.74    2.43
 -10   0  17   29.64    2.72
 -10   0  16  347.05   10.92
 -10   0  16  336.61   10.69
 -10   0  15  108.17    7.02
 -10   0  14   19.90    3.72
 -10   0  13    4.14    2.27
 -10   0  12   72.26    7.01
 -10   0  11   10.73    3.09
 -10   0  10   49.15    5.73
 -10   0  10   56.90    6.16
 -10   0   9  293.33   13.29
 -10   0   9  288.25   13.91
 -10   0   8  109.34    8.28
 -10   0   8  105.42    8.52
 -10   0   7 1803.88   32.46
 -10   0   7 1774.33   34.16
 -10   0   6  363.22   14.75
 -10   0   6  342.79   15.17
 -10   0   5  940.65   23.40
 -10   0   5  878.36   24.00
 -10   0   4  143.29    9.83
 -10   0   4  141.20    9.22
  10   0  -3  116.99    8.53
 -10   0   3  115.27    8.46
  10   0  -2  547.31   19.26
  10   0  -2  576.62   18.40
 -10   0   2  538.43   17.79
  10   0  -1  451.17   17.67
  10   0  -1  446.64   16.29
  10   0   0   24.64    4.79
  10   0   0   18.74    3.77
  10   0   1  763.12   22.82
  10   0   1  750.01   20.71
  10   0   2   41.60    5.94
  10   0   2   35.45    4.89
  10   0   3  904.39   23.63
  10   0   3  854.69   20.38
  10   0   4    9.64    3.43
  10   0   4    9.33    2.22
  10   0   5    5.20    2.39
  10   0   6   34.74    3.76
  10   0   7   -0.04    0.98
 -10  -1  17   75.09    4.36
 -10  -1  16  139.64    7.15
 -10  -1  16  137.68    6.73
 -10  -1  15   19.15    3.07
 -10  -1  14   88.92    6.90
 -10  -1  13  142.95    9.17
 -10  -1  12   43.00    5.69
 -10  -1  11  207.43   11.68
 -10  -1  10   27.83    4.65
 -10  -1   9  913.10   22.59
 -10  -1   9  891.05   24.40
 -10  -1   8  207.55   10.72
 -10  -1   8  211.07   12.08
 -10  -1   7  140.50    8.71
 -10  -1   7  142.24    9.90
 -10  -1   6  448.10   15.67
 -10  -1   6  429.43   16.86
 -10  -1   5    1.42    2.21
 -10  -1   5    3.41    2.98
  10   1  -4  954.59   24.33
  10   1  -3  566.65   18.76
  10   1  -2   56.01    6.44
  10   1  -2   58.65    6.20
  10   1  -1  317.47   14.79
  10   1  -1  301.00   13.65
  10   1   0    3.40    2.51
  10   1   0    0.98    2.04
  10   1   1  707.86   21.53
  10   1   1  717.71   20.39
  10   1   2  658.19   20.32
  10   1   2  648.90   18.77
  10   1   3   91.56    7.57
  10   1   3   77.37    6.38
  10   1   4    5.38    2.54
  10   1   4    7.26    2.30
  10   1   5   29.49    3.73
  10   1   5   24.24    2.82
  10   1   6   14.49    2.19
 -10  -2  17   88.93    4.58
 -10  -2  16   10.09    2.26
 -10  -2  16   10.75    1.99
 -10  -2  15  153.18    7.88
 -10  -2  14   25.37    3.69
 -10  -2  13  288.80   12.55
 -10  -2  12  337.39   14.13
 -10  -2  11  472.05   17.10
 -10  -2  10  259.00   13.00
 -10  -2   9   -1.61    2.08
  10   2  -8  489.38   16.21
 -10  -2   8  473.21   17.62
  10   2  -7   45.20    5.27
 -10  -2   7   43.81    5.71
 -10  -2   6  200.42   11.76
 -10  -2   5  954.32   25.17
  10   2  -4   37.10    5.25
  10   2  -3  567.32   18.98
  10   2  -2   64.99    6.71
  10   2  -1  301.92   14.13
  10   2  -1  285.13   13.47
  10   2   0  322.24   14.35
  10   2   0  305.73   13.74
  10   2   1   25.87    4.37
  10   2   1   26.89    4.42
  10   2   2  176.11   10.11
  10   2   2  169.79    9.63
  10   2   3   72.74    6.23
  10   2   3   68.38    5.78
  10   2   4    2.56    1.51
  10   2   4    3.95    1.55
  10   2   5    2.33    1.30
  10   2   5    1.98    1.15
 -10  -3  17   16.14    1.92
 -10  -3  16   32.37    3.43
 -10  -3  16   26.78    2.58
 -10  -3  15   46.13    4.15
 -10  -3  14   77.20    5.90
 -10  -3  13  158.39    8.95
 -10  -3  12  227.71   11.32
  10   3 -11   83.02    6.64
 -10  -3  11   88.73    7.52
  10   3 -10  767.97   20.10
 -10  -3  10  772.10   21.60
  10   3  -9   82.82    6.96
 -10  -3   9   82.85    7.51
  10   3  -8    5.11    2.53
 -10  -3   8    5.09    2.72
  10   3  -7  311.73   13.56
 -10  -3   7  301.78   14.02
 -10  -3   6    3.67    2.69
 -10  -3   5  890.81   24.03
  10   3  -4  249.89   12.73
  10   3  -3   30.10    4.79
  10   3  -2  352.19   14.94
  10   3  -1   -0.35    1.57
  10   3   0  472.70   16.63
  10   3   1   88.12    6.75
  10   3   1   79.28    6.76
  10   3   2   14.93    3.11
  10   3   2   14.18    3.30
  10   3   3    1.05    1.75
  10   3   4    0.71    1.04
 -10  -4  16   41.34    3.24
 -10  -4  15   16.20    2.30
 -10  -4  14  184.21    8.10
  10   4 -13   30.72    3.51
 -10  -4  13   31.54    3.89
  10   4 -12  626.25   16.71
 -10  -4  12  606.19   17.07
  10   4 -11  831.84   20.42
 -10  -4  11  790.56   20.30
  10   4 -10  117.38    8.13
 -10  -4  10  108.65    7.97
  10   4  -9   21.81    4.07
 -10  -4   9   20.54    3.75
  10   4  -8   41.27    5.35
 -10  -4   8   48.48    5.74
  10   4  -7  707.36   20.43
 -10  -4   7  730.56   21.04
  10   4  -6 1296.45   27.76
 -10  -4   6 1324.73   28.41
 -10  -4   5   10.23    3.18
  10   4  -4  569.30   18.79
  10   4  -3    1.84    2.71
  10   4  -2  282.08   12.98
  10   4  -1  125.28    8.58
  10   4   0    3.69    1.92
  10   4   1   14.06    3.05
  10   4   2   77.90    5.75
  10   4   3   23.91    3.05
  10   4   4   16.79    2.04
  10   5 -16  131.45    5.06
 -10  -5  15   52.84    3.58
  10   5 -14   66.37    4.40
 -10  -5  14   71.26    4.28
  10   5 -13  175.19    8.03
 -10  -5  13  170.31    7.56
  10   5 -12    6.43    2.31
 -10  -5  12    8.01    1.89
  10   5 -11  910.79   20.88
 -10  -5  11  909.21   20.04
  10   5 -10    4.04    2.20
 -10  -5  10    5.56    2.48
  10   5  -9  301.42   12.88
 -10  -5   9  281.72   12.02
  10   5  -8  488.97   16.67
 -10  -5   8  479.63   16.00
  10   5  -7    4.11    2.61
 -10  -5   7    3.16    2.57
  10   5  -6  308.91   13.55
 -10  -5   6  303.74   13.11
 -10  -5   5  221.25   11.22
  10   5  -4  146.03    9.43
 -10  -5   4  145.22    9.12
  10   5  -3  273.07   12.47
  10   5  -2  228.71   11.13
  10   5  -1  108.67    7.57
  10   5   0    2.11    1.88
  10   5   1  110.75    6.58
  10   5   2    0.88    1.15
  10   5   3   77.48    3.94
  10   6 -14  108.25    5.22
  10   6 -13   76.61    5.19
  10   6 -12  320.51   11.17
  10   6 -11   40.41    4.59
 -10  -6  11   41.87    3.91
  10   6 -10  601.57   16.88
 -10  -6  10  592.10   15.06
  10   6  -9   24.99    4.11
 -10  -6   9   27.73    3.77
  10   6  -8  605.09   17.79
 -10  -6   8  599.99   16.24
  10   6  -7  247.37   11.55
 -10  -6   7  246.90   10.62
  10   6  -6   40.48    5.12
 -10  -6   6   40.72    4.61
  10   6  -5   68.32    6.27
 -10  -6   5   75.06    6.05
  10   6  -4    2.33    2.39
 -10  -6   4   -0.34    1.41
 -10  -6   3  379.51   12.98
  10   6  -2   20.09    3.40
 -10  -6   2   19.70    3.24
  10   6  -1    1.14    1.78
 -10  -6   1    2.65    1.68
  10   6   0  116.67    6.43
 -10  -6   0  116.38    6.11
  10   6   1   55.80    4.02
 -10  -6  -1   54.18    3.76
  10   7 -13    2.62    1.34
  10   7 -12  167.79    7.41
  10   7 -11  105.53    6.40
  10   7 -10  337.22   11.77
  10   7  -9  440.35   13.82
  10   7  -8  305.47   11.79
 -10  -7   8  296.02    9.68
  10   7  -7  350.51   12.68
 -10  -7   7  352.14   10.91
  10   7  -6    8.77    2.72
 -10  -7   6    6.82    1.90
  10   7  -5    5.89    2.37
 -10  -7   5    4.48    1.70
  10   7  -4   76.72    5.89
 -10  -7   4   73.10    5.03
  10   7  -3    1.66    1.54
 -10  -7   3   -0.17    1.42
  10   7  -2   56.15    4.59
 -10  -7   2   55.21    3.96
  10   7  -1   42.06    3.60
 -10  -7   1   36.66    2.83
  10   8 -12   33.52    2.94
  10   8 -11  283.00    8.94
  10   8 -10   18.58    2.73
  10   8  -9  480.84   12.81
  10   8  -8   45.70    4.25
  10   8  -7  183.93    8.20
  10   8  -6    2.86    1.58
  10   8  -5   19.46    2.97
  10   8  -4    9.27    2.07
  10   8  -3  116.07    5.54
  10   9  -9   26.29    2.47
  10   9  -8   60.43    3.70
 -11  12   1   85.36    4.76
 -11  12   0  605.17   12.39
 -11  12  -1    1.78    1.04
 -11  11   7  547.24   11.47
 -11  11   6    9.61    1.94
 -11  11   5  605.03   13.81
 -11  11   4    6.74    1.47
 -11  11   3  442.55   11.76
 -11  11   2  196.33    8.15
 -11  11   1  111.83    6.35
 -11  11   0  110.19    6.32
 -11  11  -1   26.31    3.30
 -11  11  -2  334.23   10.31
 -11  11  -3  240.15    8.08
 -11  10   9  412.50    9.98
 -11  10   8    3.53    1.66
 -11  10   7  166.71    8.25
 -11  10   6  198.05    9.60
 -11  10   5   85.28    6.81
 -11  10   4  742.75   18.85
 -11  10   4  769.06   16.37
 -11  10   3    9.73    2.57
 -11  10   3   13.09    2.64
 -11  10   2  139.01    7.50
 -11  10   1   27.46    3.66
 -11  10   0   26.49    3.77
 -11  10  -1  231.54    9.95
 -11  10  -2    4.01    1.77
 -11  10  -3    5.24    1.94
 -11  10  -4   10.93    1.94
 -11   9  10    4.65    1.60
 -11   9   9  403.54   12.10
 -11   9   8  146.90    8.29
 -11   9   7    3.95    2.48
 -11   9   6  570.08   18.44
 -11   9   5  181.35   10.84
 -11   9   5  166.24    7.77
 -11   9   5  155.08    7.97
 -11   9   4  495.02   17.60
 -11   9   4  469.89   13.60
 -11   9   4  472.68   14.40
 -11   9   3  764.81   20.80
 -11   9   3  726.62   17.53
 -11   9   3  702.83   17.88
 -11   9   2  128.85    7.72
 -11   9   2  127.24    7.91
 -11   9   1   59.21    5.35
 -11   9   1   51.01    5.06
 -11   9   0   70.72    6.16
 -11   9   0   68.30    5.82
 -11   9  -1   14.59    2.89
 -11   9  -1   18.83    3.30
 -11   9  -2   32.85    4.31
 -11   9  -2   33.15    3.89
 -11   9  -3  281.06   11.09
 -11   9  -3  249.62    9.45
 -11   9  -4   89.94    5.93
 -11   9  -4   89.23    5.15
 -11   9  -5    8.73    1.81
 -11   8  11  323.17    9.28
 -11   8  11  332.78    9.37
 -11   8  10  606.14   14.92
 -11   8  10  577.05   14.03
 -11   8   9    2.51    2.22
 -11   8   8  377.40   14.60
 -11   8   7   77.30    7.40
 -11   8   6  267.72   13.92
 -11   8   6  246.04   10.86
 -11   8   5  496.10   19.19
 -11   8   5  420.70   14.51
 -11   8   4   -0.06    1.95
 -11   8   4    2.25    2.42
 -11   8   4    5.20    2.04
 -11   8   3  423.00   16.92
 -11   8   3  408.98   13.51
 -11   8   3  389.84   14.48
 -11   8   2    1.80    2.21
 -11   8   2    3.48    2.19
 -11   8   2    2.63    1.61
 -11   8   1  169.19    9.29
 -11   8   1  182.43    9.97
 -11   8   0    0.60    1.34
 -11   8   0    0.81    2.12
 -11   8  -1   55.82    5.68
 -11   8  -1   53.90    5.51
 -11   8  -2  177.55    9.80
 -11   8  -2  165.45    9.21
 -11   8  -3  167.63    9.19
 -11   8  -3  160.96    8.58
 -11   8  -4   74.16    5.87
 -11   8  -4   68.16    5.27
 -11   8  -5   10.37    2.12
 -11   8  -5    9.07    2.20
 -11   8  -6   92.11    4.82
 -11   7  13  129.48    5.16
 -11   7  12  687.56   12.86
 -11   7  12  700.22   14.31
 -11   7  11    7.07    1.94
 -11   7  10  554.49   15.89
 -11   7   9  412.57   15.07
 -11   7   8  140.20    9.68
 -11   7   7  417.62   17.34
 -11   7   7  341.46   13.35
 -11   7   6    5.60    2.19
 -11   7   6   14.90    3.71
 -11   7   5  262.84   12.24
 -11   7   4  240.56   11.82
 -11   7   3   31.72    3.89
 -11   7   3   27.00    4.23
 -11   7   2  123.64    7.92
 -11   7   2  129.42    8.89
 -11   7   1    4.65    2.56
 -11   7   1    7.10    2.60
 -11   7   0   -1.25    2.14
 -11   7   0    1.29    2.03
 -11   7  -1    6.66    2.87
 -11   7  -1    5.94    2.69
 -11   7  -2  399.45   14.82
 -11   7  -2  400.25   14.75
 -11   7  -3   65.69    6.14
 -11   7  -3   73.03    6.32
 -11   7  -4  117.57    7.51
 -11   7  -4  116.04    7.35
 -11   7  -5    3.86    1.90
 -11   7  -5    3.52    1.78
 -11   7  -6   13.82    2.23
 -11   7  -6   15.54    2.22
 -11   6  14   85.11    4.15
 -11   6  13   19.71    2.19
 -11   6  13   25.07    2.96
 -11   6  12  363.27   10.67
 -11   6  11  433.20   13.53
 -11   6  10    2.05    2.09
 -11   6   9  856.87   22.73
 -11   6   8   28.43    4.43
 -11   6   7 1160.40   25.82
 -11   6   6  461.60   16.55
 -11   6   5    4.82    2.31
 -11   6   4    1.88    1.41
 -11   6   3   34.78    4.88
 -11   6   2    2.88    2.35
 -11   6   2    5.62    2.68
 -11   6   1    2.41    2.48
 -11   6   1    3.05    2.14
 -11   6   0   81.19    6.78
 -11   6   0   79.04    7.17
 -11   6  -1   97.74    7.57
 -11   6  -1   89.31    7.36
 -11   6  -2   25.52    4.34
 -11   6  -2   23.34    4.13
 -11   6  -3  345.32   13.55
 -11   6  -4   11.10    2.65
 -11   6  -5  193.60    8.79
 -11   6  -6   27.45    3.01
 -11   6  -6   28.98    3.23
 -11   5  14   59.23    4.08
 -11   5  13  450.91   10.74
 -11   5  12    2.95    1.51
 -11   5  12   -0.01    1.36
 -11   5  11  691.98   18.07
 -11   5  11  683.17   17.34
 -11   5  10  643.00   17.76
 -11   5   9  593.51   18.41
 -11   5   9  621.51   18.12
 -11   5   8  401.41   15.56
 -11   5   8  423.03   15.32
 -11   5   7  272.30   13.02
 -11   5   6   15.84    3.66
 -11   5   5    6.13    2.51
 -11   5   4   12.84    3.34
 -11   5   3    6.39    2.61
 -11   5   2  174.29   10.67
 -11   5   1  131.61    8.39
 -11   5   1  142.23    9.63
 -11   5   0  166.32    9.59
 -11   5   0  169.38   10.47
 -11   5  -1   63.75    6.26
 -11   5  -2   64.05    6.05
 -11   5  -3   74.14    6.42
 -11   5  -4  331.46   12.56
 -11   5  -5   30.62    3.77
 -11   5  -6  576.87   13.06
 -11   5  -7  110.39    4.68
 -11   4  15  447.09    9.75
 -11   4  14   68.08    4.59
 -11   4  13 1019.81   17.42
 -11   4  13  995.85   16.90
 -11   4  13 1013.92   19.51
 -11   4  12  396.44   12.76
 -11   4  12  409.66   13.53
 -11   4  11    1.82    1.69
 -11   4  10  437.08   15.51
 -11   4   9   25.66    4.33
 -11   4   9   22.14    3.82
 -11   4   8  594.95   19.17
 -11   4   8  602.79   18.89
 -11   4   7   70.02    6.93
 -11   4   7   74.15    6.93
 -11   4   6   11.24    3.19
 -11   4   6   13.38    3.19
 -11   4   5   37.77    5.14
 -11   4   4    8.28    2.83
 -11   4   3    4.99    2.60
 -11   4   2  194.16   11.36
 -11   4   1  492.13   17.83
 -11   4   0   -0.06    1.79
  11  -4   1   11.90    3.02
 -11   4  -1    9.50    2.74
  11  -4   2  273.22   12.20
 -11   4  -2  262.86   11.87
  11  -4   3    7.73    2.28
  11  -4   4  424.97   13.52
  11  -4   5  386.06   11.52
 -11   4  -5  385.38   12.06
 -11   4  -6  183.77    7.15
 -11   3  15  671.73   11.04
 -11   3  15  865.55   14.55
 -11   3  14 1046.40   17.49
 -11   3  14 1107.12   19.78
 -11   3  13   68.57    4.84
 -11   3  13   69.77    5.69
 -11   3  12  108.63    7.46
 -11   3  11   42.38    5.07
 -11   3  10  291.72   13.19
 -11   3  10  279.47   12.83
 -11   3   9  160.08   10.08
 -11   3   9  170.00   10.17
 -11   3   8   27.74    4.47
 -11   3   8   25.36    4.05
 -11   3   7   62.11    6.54
 -11   3   7   60.97    6.38
 -11   3   6   32.56    5.05
 -11   3   6   40.31    5.04
 -11   3   5   13.11    3.69
 -11   3   5   13.57    3.18
 -11   3   4   30.93    4.74
 -11   3   4   32.85    4.98
 -11   3   3  142.81    9.29
 -11   3   3  127.82    9.21
 -11   3   2  263.35   12.57
 -11   3   2  260.97   13.04
 -11   3   1  161.98   10.17
  11  -3   0   44.09    5.50
  11  -3   1   61.20    6.38
  11  -3   2  143.03    9.13
  11  -3   3  508.99   16.24
  11  -3   4   12.06    2.89
  11  -3   5  551.87   14.04
 -11   3  -6   41.12    3.34
 -11   3  -6   42.35    3.27
 -11   2  15    7.61    1.78
 -11   2  15   10.12    2.21
 -11   2  14  685.91   16.47
 -11   2  13   82.98    6.48
 -11   2  12  700.79   19.17
 -11   2  11   60.16    6.14
 -11   2  10  102.76    8.05
 -11   2  10  111.46    8.32
 -11   2   9    2.48    1.90
 -11   2   9    5.41    2.37
 -11   2   8  148.68    9.64
 -11   2   8  150.97    9.77
 -11   2   7   87.48    7.54
 -11   2   7   93.79    7.93
 -11   2   6   -1.00    2.00
 -11   2   6    2.69    1.59
 -11   2   5    3.38    2.60
 -11   2   5    7.41    2.69
 -11   2   4   39.05    5.12
 -11   2   4   46.10    5.50
 -11   2   3   47.16    5.59
 -11   2   3   44.81    5.71
 -11   2   2  964.86   24.20
 -11   2   2  973.44   24.65
 -11   2   1  248.37   12.15
 -11   2   1  234.62   12.02
  11  -2   0  234.69   12.30
 -11   2   0  238.52   11.61
  11  -2   1  353.64   14.70
 -11   2  -1  344.49   13.32
  11  -2   2    4.33    2.56
  11  -2   3  550.01   16.87
  11  -2   4  159.19    8.55
  11  -2   5  355.13   11.16
 -11   1  16  665.63   11.89
 -11   1  16  703.23   12.91
 -11   1  15  524.97   12.87
 -11   1  15  531.14   13.40
 -11   1  14   24.22    3.60
 -11   1  13  209.39   10.19
 -11   1  12   71.77    6.61
 -11   1  11  491.73   16.90
 -11   1  10    1.76    2.04
 -11   1  10    4.20    2.41
 -11   1   9   43.75    5.33
 -11   1   9   43.96    5.31
 -11   1   8  141.35    9.28
 -11   1   8  137.70    9.43
 -11   1   7  235.18   11.80
 -11   1   7  228.29   12.08
 -11   1   6   12.32    3.31
 -11   1   6   12.07    3.34
 -11   1   5    0.39    1.69
 -11   1   5    2.55    1.73
 -11   1   4  151.55    9.98
 -11   1   4  165.81    9.95
 -11   1   3   24.87    4.32
 -11   1   3   24.61    4.22
 -11   1   2  147.75    9.62
 -11   1   2  148.09    9.40
 -11   1   1  708.47   20.63
 -11   1   1  747.79   20.81
 -11   1   0   14.70    3.05
  11  -1   0   11.89    3.61
  11  -1   1  718.16   20.82
  11  -1   2   46.57    5.54
  11  -1   3  270.88   11.68
  11  -1   4  392.41   12.77
 -11   1  -4  377.31   10.95
 -11   1  -5   11.64    1.53
  11  -1   5   12.22    2.18
 -11   0  16  126.81    5.63
 -11   0  16  134.92    5.86
 -11   0  15  380.41   11.40
 -11   0  14   24.30    3.53
 -11   0  13  227.50   10.66
 -11   0  12    0.05    1.64
 -11   0  11   65.11    6.36
 -11   0  10    2.67    2.14
 -11   0   9   89.50    7.19
 -11   0   9   86.42    7.50
 -11   0   8  117.49    8.18
 -11   0   8  118.92    8.83
 -11   0   7   24.23    4.10
 -11   0   7   22.25    4.26
 -11   0   6  138.34    8.96
 -11   0   6  141.13    9.53
 -11   0   5   15.64    3.55
 -11   0   5   15.35    3.39
 -11   0   4   25.54    4.24
 -11   0   4   22.38    4.14
 -11   0   3  424.07   16.35
 -11   0   3  434.60   15.26
  11   0  -2  540.22   17.12
 -11   0   2  525.16   16.70
  11   0  -1  125.73    8.32
 -11   0   1  120.14    8.00
  11   0   0  493.64   17.45
  11   0   0  494.95   15.51
 -11   0   0  498.31   15.46
  11   0   1  361.07   14.51
  11   0   1  361.33   12.53
 -11   0  -1  355.73   12.53
  11   0   2  917.27   21.77
 -11   0  -2  887.85   18.25
  11   0   3    2.86    2.25
  11   0   4  130.65    6.97
 -11   0  -4  109.59    5.29
 -11  -1  16    1.78    1.26
 -11  -1  16    2.49    1.15
 -11  -1  15   -0.34    1.31
 -11  -1  14    5.49    1.95
 -11  -1  13   59.84    5.62
 -11  -1  12   66.15    6.06
 -11  -1  11  170.41    9.98
 -11  -1  10  214.21   11.42
 -11  -1   9    2.54    1.57
 -11  -1   9    0.81    2.47
 -11  -1   8    5.15    2.20
 -11  -1   8   13.94    3.41
 -11  -1   7   75.26    7.14
 -11  -1   6    5.17    2.68
 -11  -1   5  504.05   17.98
 -11  -1   4  147.83    9.73
  11   1  -3  227.07   11.47
 -11  -1   3  251.11   12.52
  11   1  -2  950.45   22.81
  11   1  -1   38.99    5.06
  11   1   0  784.03   19.54
  11   1   1   23.23    3.98
  11   1   1   21.50    3.25
  11   1   2  597.21   16.56
  11   1   2  584.80   14.46
  11   1   3  196.28    7.20
 -11  -1  -4   17.31    2.02
 -11  -2  16   58.18    3.72
 -11  -2  16   54.39    3.34
 -11  -2  15   81.57    4.98
 -11  -2  14    1.14    1.19
 -11  -2  13    5.14    2.31
 -11  -2  12   11.55    3.02
 -11  -2  11   -0.12    1.94
 -11  -2  10   26.67    4.27
 -11  -2   9   96.84    7.91
 -11  -2   8   91.83    7.84
 -11  -2   7  515.25   17.73
  11   2  -6  154.13    8.88
 -11  -2   6  146.31    9.71
 -11  -2   5  411.65   15.99
 -11  -2   4  565.20   18.69
  11   2  -3    0.70    1.87
 -11  -2   3    1.08    2.06
  11   2  -2  596.84   17.98
  11   2  -1   66.94    6.14
  11   2   0  194.73    9.56
  11   2   1  560.70   14.98
  11   2   2   16.20    2.50
  11   2   3   13.33    1.95
 -11  -3  16    2.34    0.76
 -11  -3  15    5.91    1.44
 -11  -3  14   14.44    2.30
 -11  -3  13   88.20    5.99
 -11  -3  12  361.76   12.81
 -11  -3  11  219.49   10.43
 -11  -3  10    9.79    2.94
  11   3  -9   23.56    3.29
 -11  -3   9   17.96    3.66
  11   3  -8  163.00    8.86
 -11  -3   8  153.30    9.52
  11   3  -7  110.05    7.49
 -11  -3   7  132.77    8.98
  11   3  -6 1288.22   25.44
 -11  -3   6 1275.15   27.19
  11   3  -5   31.13    4.39
 -11  -3   5   31.02    4.60
 -11  -3   4  566.70   18.06
  11   3  -3  311.14   12.95
 -11  -3   3  322.01   13.56
  11   3  -2  209.82   10.36
  11   3  -1  116.91    7.49
  11   3   0   30.12    3.75
  11   3   1   82.34    5.40
  11   3   2  195.86    7.23
 -11  -4  15    9.56    1.50
 -11  -4  14    1.78    1.06
 -11  -4  13   82.12    5.16
 -11  -4  12   28.48    3.38
  11   4 -11  110.51    6.34
 -11  -4  11  109.89    6.89
  11   4 -10   27.62    3.60
 -11  -4  10   30.64    3.95
  11   4  -9    1.99    1.10
 -11  -4   9   -1.39    1.80
  11   4  -8  553.08   16.02
 -11  -4   8  550.32   16.74
  11   4  -7  317.71   12.30
 -11  -4   7  309.19   12.74
  11   4  -6  273.24   11.61
 -11  -4   6  266.94   11.90
  11   4  -5  588.66   16.95
 -11  -4   5  571.90   17.24
 -11  -4   4   28.39    4.21
 -11  -4   3  342.39   12.98
  11   4  -2    4.09    2.21
 -11  -4   2    3.82    2.27
  11   4  -1  220.27    9.48
 -11  -4   1  224.47    9.64
  11   4   0   99.83    5.96
 -11  -4   0   99.36    6.06
 -11  -4  -1   69.79    4.52
 -11  -5  13  149.87    5.68
  11   5 -12  494.42   11.64
 -11  -5  12  504.75   11.96
  11   5 -11   -1.30    1.32
 -11  -5  11    0.73    1.49
  11   5 -10  142.29    7.34
 -11  -5  10  141.34    7.28
  11   5  -9   88.46    6.08
 -11  -5   9   82.64    5.86
  11   5  -8  192.48    9.18
 -11  -5   8  193.21    9.07
  11   5  -7  580.68   15.99
 -11  -5   7  580.45   15.91
  11   5  -6    8.32    2.75
 -11  -5   6    9.11    2.77
  11   5  -5  529.87   15.30
 -11  -5   5  526.90   15.08
  11   5  -4   28.68    3.89
 -11  -5   4   32.53    3.92
  11   5  -3  207.69    9.26
 -11  -5   3  206.98    9.12
 -11  -5   2  303.85   10.47
 -11  -5   1    9.66    1.98
 -11  -5   0   15.63    2.24
  11   6 -12  216.84    7.05
  11   6 -11  420.71   10.84
  11   6 -10   80.81    5.32
 -11  -6  10   84.00    4.73
  11   6  -9  414.20   12.01
 -11  -6   9  405.94   10.87
  11   6  -8   55.45    4.78
 -11  -6   8   54.54    4.31
  11   6  -7  296.12   10.59
 -11  -6   7  293.59    9.80
  11   6  -6  146.77    7.57
 -11  -6   6  150.31    7.09
  11   6  -5   90.27    5.91
 -11  -6   5   87.58    5.48
  11   6  -4  204.58    8.46
 -11  -6   4  200.27    7.83
  11   6  -3    3.68    1.58
 -11  -6   3    2.81    1.46
  11   6  -2   66.89    4.30
 -11  -6   2   64.27    3.83
  11   7 -11  269.21    7.36
  11   7 -10    8.27    1.67
  11   7  -9  663.07   13.28
  11   7  -8  380.55   10.36
  11   7  -7   27.55    3.04
  11   7  -6   17.98    2.42
  11   7  -5   75.49    4.53
  11   7  -4   29.26    2.64
 -12  10   7  192.62    6.69
 -12  10   6  257.59    8.24
 -12  10   5  394.41   10.09
 -12  10   3  517.74   10.53
 -12  10   2    6.86    1.55
 -12  10   1  247.61    7.85
 -12  10   0  158.02    6.30
 -12  10  -1   88.14    4.52
 -12   9   9  135.04    5.78
 -12   9   8    3.18    1.59
 -12   9   7  645.50   15.43
 -12   9   6    2.84    1.90
 -12   9   5 1062.28   20.78
 -12   9   4   77.92    5.54
 -12   9   4   73.76    5.19
 -12   9   3  455.82   11.09
 -12   9   3  463.84   12.57
 -12   9   2   53.27    3.96
 -12   9   2   53.28    4.46
 -12   9   1    3.99    1.38
 -12   9   1    2.63    1.35
 -12   9   0   49.64    4.06
 -12   9   0   48.15    3.93
 -12   9  -1  112.28    5.75
 -12   9  -1   98.77    5.26
 -12   9  -2   36.65    3.19
 -12   9  -3  183.95    6.07
 -12   8  10   67.55    4.32
 -12   8   9  386.16   11.57
 -12   8   9  350.92    9.58
 -12   8   8   44.67    4.57
 -12   8   7  423.10   14.34
 -12   8   6  311.08   12.78
 -12   8   6  270.06   10.25
 -12   8   5  434.59   15.15
 -12   8   5  387.52   12.67
 -12   8   4  932.73   21.36
 -12   8   4  874.51   19.26
 -12   8   3    7.05    2.56
 -12   8   3    7.07    2.47
 -12   8   3    5.95    1.55
 -12   8   2  106.92    6.03
 -12   8   2  113.64    7.09
 -12   8   1   68.05    4.89
 -12   8   1   72.70    5.79
 -12   8   0    5.04    2.03
 -12   8   0    2.83    1.73
 -12   8  -1  186.32    7.87
 -12   8  -1  184.22    8.33
 -12   8  -2  175.88    7.31
 -12   8  -2  167.17    7.40
 -12   8  -3   79.78    4.56
 -12   8  -3   84.09    4.73
 -12   7  11  496.49   11.28
 -12   7  11  490.14   11.26
 -12   7  10  142.67    7.11
 -12   7   9  342.59   12.14
 -12   7   8  144.20    8.69
 -12   7   7  142.86    9.22
 -12   7   7  128.70    7.70
 -12   7   6  892.26   23.21
 -12   7   6  754.49   18.71
 -12   7   5  138.48    9.42
 -12   7   5  130.05    8.19
 -12   7   4  336.65   14.13
 -12   7   4  330.34   12.79
 -12   7   3  125.43    8.25
 -12   7   3  124.03    8.00
 -12   7   2   21.46    2.94
 -12   7   2   27.21    4.14
 -12   7   1   97.89    6.00
 -12   7   1   98.73    7.15
 -12   7   0   13.32    2.89
 -12   7   0    7.36    1.95
 -12   7  -1   41.46    4.15
 -12   7  -1   49.22    4.84
 -12   7  -2  207.78    8.31
 -12   7  -2  203.58    8.97
 -12   7  -3   11.39    2.24
 -12   7  -3   11.99    2.19
 -12   7  -4   31.04    2.74
 -12   7  -4   38.03    3.16
 -12   6  13  233.97    6.67
 -12   6  12  192.93    6.65
 -12   6  11  135.17    6.72
 -12   6  10 1309.96   23.28
[truncated: 14,822 more chars]
